# Supplementary material for: Candidate Pathways for Promoting Differentiation or Quiescence of Oligodendrocyte Progenitor-like Cells in Glioma
Source: Oxford University Press journal article supplement (doi:10.1158/0008-5472.can-11-2632), 2012-08-04
Supplement: 00085472can112632-sup-tab_1_xls_6305k.xls [file 00085472can112632-sup-tab_1_xls_6305k.xls]

## Sheet: OPC - Table 1
Row	OPC_SI	OPC_pSI	Astrocyte_SI	Astrocyte_pSI	Oligodendroctye_SI	Oligodendrocyte_pSI	Neuron_SI	Neuron_pSI	Entrez	Symbol	Name
3417	14.6667	1.01798e-05	NA	NA	NA	NA	NA	NA	16763	Lad1	ladinin
4283	22.3333	3.39328e-05	NA	NA	NA	NA	NA	NA	18595	Pdgfra	platelet derived growth factor receptor, alpha polypeptide
10978	23	3.56295e-05	NA	NA	2358.67	NA	NA	NA	574402	Gpr17	G protein-coupled receptor 17
13306	31.6667	5.59891e-05	NA	NA	NA	NA	NA	NA	69627	Fam89a	family with sequence similarity 89, member A
10122	32.6667	5.76858e-05	NA	NA	NA	NA	NA	NA	52033	Pbk	PDZ binding kinase
1446	34.3333	6.6169e-05	NA	NA	NA	NA	NA	NA	12159	Bmp4	bone morphogenetic protein 4
3732	36.3333	7.12589e-05	NA	NA	NA	NA	NA	NA	17183	Matn4	matrilin 4
11959	38	7.46522e-05	NA	NA	NA	NA	NA	NA	668303	Kif26a	kinesin family member 26A
9274	50	0.000135731	NA	NA	NA	NA	NA	NA	319903	9630013A20Rik	RIKEN cDNA 9630013A20 gene
13090	57.3333	0.000179844	NA	NA	NA	NA	NA	NA	69060	Pnlip	pancreatic lipase
8215	61.6667	0.000208687	NA	NA	NA	NA	NA	NA	242523	Dmrta1	doublesex and mab-3 related transcription factor like family A1
1428	73	0.000285036	NA	NA	NA	NA	NA	NA	121021	Cspg4	chondroitin sulfate proteoglycan 4
8646	78	0.000318968	NA	NA	NA	NA	NA	NA	268697	Ccnb1	cyclin B1
8776	78.6667	0.000322362	NA	NA	NA	NA	NA	NA	269629	Lhfpl3	lipoma HMGIC fusion partner-like 3
7471	79.3333	0.000322362	NA	NA	NA	NA	NA	NA	232599	EG232599	predicted gene, EG232599
1573	94.3333	0.00045979	2831.67	NA	NA	NA	NA	NA	12389	Cav1	caveolin 1, caveolae protein
5739	94.6667	0.000466576	NA	NA	NA	NA	NA	NA	21346	Tagln2	transgelin 2
10979	99	0.000503902	NA	NA	NA	NA	NA	NA	574403	EG574403	predicted gene, EG574403
726	105.333	0.000549712	NA	NA	NA	NA	NA	NA	108907	Nusap1	nucleolar and spindle associated protein 1
8888	106	0.000551408	NA	NA	NA	NA	NA	NA	272031	E130309F12Rik	RIKEN cDNA E130309F12 gene
2407	107.333	0.000564981	NA	NA	NA	NA	NA	NA	14121	Fbp1	fructose bisphosphatase 1
9800	108.333	0.000585341	NA	NA	NA	NA	NA	NA	382111	Susd5	sushi domain containing 5
7549	111.333	0.000622667	NA	NA	NA	NA	NA	NA	233406	Prc1	protein regulator of cytokinesis 1
8098	115	0.000659993	NA	NA	NA	NA	NA	NA	240638	Slc16a12	solute carrier family 16 (monocarboxylic acid transporters), member 12
6872	117.667	0.000692229	2694.67	NA	NA	NA	NA	NA	226250	Afap1l2	actin filament associated protein 1-like 2
9385	118.667	0.000699016	NA	NA	NA	NA	NA	NA	320701	Fam19a4	family with sequence similarity 19, member A4
6455	132.333	0.000895826	2620.67	NA	NA	NA	NA	NA	22139	Ttr	transthyretin
8884	136	0.000929759	NA	NA	3052.33	NA	NA	NA	271849	Shc4	SHC (Src homology 2 domain containing) family, member 4
16316	136.667	0.000939939	NA	NA	2547	NA	NA	NA	99586	Dpyd	dihydropyrimidine dehydrogenase
11691	142	0.00100441	NA	NA	NA	NA	NA	NA	66442	Spc25	SPC25, NDC80 kinetochore complex component, homolog (S. cerevisiae)
14259	144.333	0.00104343	NA	NA	NA	NA	NA	NA	72415	Sgol1	shugoshin-like 1 (S. pombe)
4800	149.333	0.00110451	NA	NA	NA	NA	NA	NA	195209	Gm22	gene model 22, (NCBI)
1600	150.667	0.00111809	NA	NA	NA	NA	NA	NA	12428	Ccna2	cyclin A2
6408	155.667	0.00118765	NA	NA	NA	NA	NA	NA	22032	Traf4	Tnf receptor associated factor 4
11205	160	0.0012606	NA	NA	NA	NA	NA	NA	60530	Fignl1	fidgetin-like 1
9794	163.667	0.00131999	NA	NA	2779.67	NA	NA	NA	382083	Snx22	sorting nexin 22
3832	168.667	0.00142687	NA	NA	NA	NA	NA	NA	17390	Mmp2	matrix metallopeptidase 2
6887	174.333	0.0015168	NA	NA	NA	NA	NA	NA	226359	C1ql2	complement component 1, q subcomponent-like 2
10644	174.667	0.00152189	NA	NA	NA	NA	NA	NA	56296	Dmrtb1	DMRT-like family B with proline-rich C-terminal, 1
4810	180.333	0.00163386	NA	NA	NA	NA	NA	NA	19650	Rbl1	retinoblastoma-like 1 (p107)
2916	183	0.00168985	NA	NA	NA	NA	NA	NA	15201	Hells	helicase, lymphoid specific
15353	183.333	0.00169494	NA	NA	NA	NA	NA	NA	76448	2310014H01Rik	RIKEN cDNA 2310014H01 gene
14130	192.667	0.0018171	NA	NA	NA	NA	NA	NA	72080	2010317E24Rik	RIKEN cDNA 2010317E24 gene
15935	194.667	0.00185273	NA	NA	NA	NA	NA	NA	80986	Ckap2	cytoskeleton associated protein 2
7883	197.333	0.0019172	NA	NA	NA	NA	NA	NA	23834	Cdc6	cell division cycle 6 homolog (S. cerevisiae)
8699	198.667	0.00195453	NA	NA	NA	NA	NA	NA	269019	Stk32a	serine/threonine kinase 32A
10471	209.333	0.00220563	NA	NA	NA	NA	NA	NA	54613	St3gal6	ST3 beta-galactoside alpha-2,3-sialyltransferase 6
12400	209.333	0.00220563	NA	NA	NA	NA	NA	NA	67533	Ppfibp1	PTPRF interacting protein, binding protein 1 (liprin beta 1)
12574	213	0.00228368	NA	NA	NA	NA	NA	NA	67849	Cdca5	cell division cycle associated 5
1052	216.333	0.00235494	NA	NA	NA	NA	NA	NA	11489	Adam12	a disintegrin and metallopeptidase domain 12 (meltrin alpha)
6217	221	0.00246522	NA	NA	NA	NA	NA	NA	21817	Tgm2	transglutaminase 2, C polypeptide
1401	221.333	0.0024754	NA	NA	NA	NA	NA	NA	12029	Bcl6b	B-cell CLL/lymphoma 6, member B
12010	221.667	0.00249237	2926.67	NA	NA	NA	NA	NA	66895	1300014I06Rik	RIKEN cDNA 1300014I06 gene
575	226	0.00262131	NA	NA	NA	NA	NA	NA	107373	4632417K18Rik	RIKEN cDNA 4632417K18 gene
3128	226.667	0.00264167	NA	NA	NA	NA	NA	NA	16009	Igfbp3	insulin-like growth factor binding protein 3
15772	226.667	0.00264167	NA	NA	NA	NA	NA	NA	78748	Rassf10	Ras association (RalGDS/AF-6) domain family (N-terminal) member 10
12569	228.333	0.0026756	NA	NA	NA	NA	NA	NA	67844	Rab32	RAB32, member RAS oncogene family
13144	230	0.00272141	NA	NA	NA	NA	NA	NA	69183	C1qtnf2	C1q and tumor necrosis factor related protein 2
9775	234.333	0.00285205	NA	NA	NA	NA	NA	NA	381925	Ppapdc1a	phosphatidic acid phosphatase type 2 domain containing 1A
3968	234.667	0.00286054	NA	NA	NA	NA	NA	NA	17932	Myt1	myelin transcription factor 1
3830	235.333	0.00288599	3570	NA	4688.67	NA	NA	NA	17388	Mmp15	matrix metallopeptidase 15
12818	235.667	0.00290126	2739.33	NA	NA	NA	NA	NA	68303	Fam114a1	family with sequence similarity 114, member A1
9961	236	0.00290974	NA	NA	NA	NA	NA	NA	434377	Zfp560	zinc finger protein 560
3400	237.667	0.00296064	NA	NA	NA	NA	NA	NA	16678	Krt1	keratin 1
4648	241.333	0.00302681	NA	NA	NA	NA	NA	NA	19256	Ptpn20	protein tyrosine phosphatase, non-receptor type 20
1810	242	0.00304547	NA	NA	NA	NA	NA	NA	12798	Cnn2	calponin 2
6195	249	0.00326603	NA	NA	NA	NA	NA	NA	217946	Cdca7l	cell division cycle associated 7 like
16258	254.667	0.00339667	NA	NA	NA	NA	NA	NA	98402	Sh3bp4	SH3-domain binding protein 4
2043	261	0.00355446	NA	NA	NA	NA	NA	NA	13190	Dct	dopachrome tautomerase
1602	261.333	0.00357143	4381	NA	NA	NA	NA	NA	12443	Ccnd1	cyclin D1
5038	262.333	0.00359688	NA	NA	NA	NA	NA	NA	20356	Sema5a	sema domain, seven thrombospondin repeats (type 1 and type 1-like), transmembrane domain (TM) and short cytoplasmic domain, (semaphorin) 5A
2172	266	0.00372073	NA	NA	NA	NA	NA	NA	13605	Ect2	ect2 oncogene
7875	266	0.00372073	NA	NA	NA	NA	NA	NA	23829	C1ql1	complement component 1, q subcomponent-like 1
1601	271	0.00389718	NA	NA	NA	NA	NA	NA	12442	Ccnb2	cyclin B2
1671	277.333	0.00405667	NA	NA	NA	NA	NA	NA	12534	Cdc2a	cell division cycle 2 homolog A (S. pombe)
11380	280	0.00410417	3232.67	NA	NA	NA	NA	NA	64929	Scel	sciellin
5238	289.333	0.00441805	2561.67	NA	NA	NA	NA	NA	20679	Sox6	SRY-box containing gene 6
6781	290.333	0.00443672	NA	NA	2099.67	NA	NA	NA	225341	Lims2	LIM and senescent cell antigen like domains 2
3667	299.667	0.00476926	NA	NA	NA	NA	NA	NA	171212	Galnt10	UDP-N-acetyl-alpha-D-galactosamine:polypeptide N-acetylgalactosaminyltransferase 10
11184	300	0.00477774	NA	NA	NA	NA	NA	NA	60322	Chst7	carbohydrate (N-acetylglucosamino) sulfotransferase 7
5077	303	0.00486936	NA	NA	NA	NA	NA	NA	20419	Shcbp1	Shc SH2-domain binding protein 1
2781	306.333	0.00497964	NA	NA	NA	NA	NA	NA	14793	Cdca3	cell division cycle associated 3
3218	311.667	0.0052511	NA	NA	NA	NA	NA	NA	16371	Irx1	Iroquois related homeobox 1 (Drosophila)
6690	311.667	0.0052511	NA	NA	NA	NA	NA	NA	224171	C330027C09Rik	RIKEN cDNA C330027C09 gene
8263	320.333	0.00556498	NA	NA	NA	NA	NA	NA	243312	Elfn1	leucine rich repeat and fibronectin type III, extracellular 1
4920	327.333	0.00588225	2867	NA	NA	NA	NA	NA	20135	Rrm2	ribonucleotide reductase M2
10459	330.667	0.00600102	NA	NA	NA	NA	NA	NA	54598	Calcrl	calcitonin receptor-like
11194	334.333	0.00614354	NA	NA	NA	NA	NA	NA	60411	Cenpk	centromere protein K
7996	337.333	0.00625721	NA	NA	NA	NA	NA	NA	239618	Pdzrn4	PDZ domain containing RING finger 4
6771	337.667	0.00627078	NA	NA	NA	NA	NA	NA	225182	Rbbp8	retinoblastoma binding protein 8
5431	338.333	0.00629114	NA	NA	NA	NA	NA	NA	20877	Aurkb	aurora kinase B
1079	345	0.00661351	NA	NA	NA	NA	NA	NA	11535	Adm	adrenomedullin
6151	345.333	0.00662369	NA	NA	NA	NA	NA	NA	217653	C79407	expressed sequence C79407
5227	345.667	0.00663556	NA	NA	NA	NA	NA	NA	20666	Sox11	SRY-box containing gene 11
10867	345.667	0.00663556	NA	NA	NA	NA	NA	NA	56773	Chst5	carbohydrate (N-acetylglucosamine 6-O) sulfotransferase 5
8538	351.667	0.00689854	2582.33	NA	NA	NA	NA	NA	26401	Map3k1	mitogen-activated protein kinase kinase kinase 1
4442	355.667	0.00710723	NA	NA	NA	NA	NA	NA	18974	Pole2	polymerase (DNA directed), epsilon 2 (p59 subunit)
14144	355.667	0.00710723	NA	NA	NA	NA	NA	NA	72107	Dscc1	defective in sister chromatid cohesion 1 homolog (S. cerevisiae)
1202	357	0.0071717	3101	NA	NA	NA	NA	NA	11717	Ampd3	adenosine monophosphate deaminase 3
3785	357.333	0.00718867	NA	NA	NA	NA	NA	NA	17279	Melk	maternal embryonic leucine zipper kinase
8013	358.333	0.00724126	NA	NA	NA	NA	NA	NA	239731	Rimbp3	RIMS binding protein 3
14348	358.667	0.00726162	NA	NA	NA	NA	NA	NA	72709	C1qtnf6	C1q and tumor necrosis factor related protein 6
6506	363.333	0.00750933	NA	NA	NA	NA	NA	NA	22240	Dpysl3	dihydropyrimidinase-like 3
7406	369.333	0.0077282	NA	NA	5225.67	NA	2610	NA	231842	Amz1	archaelysin family metallopeptidase 1
6947	371.667	0.00779097	NA	NA	NA	NA	NA	NA	226841	Vash2	vasohibin 2
4326	372	0.00779946	NA	NA	NA	NA	NA	NA	18670	Abcb4	ATP-binding cassette, sub-family B (MDR/TAP), member 4
2591	373	0.00784357	NA	NA	NA	NA	NA	NA	14425	Galnt3	UDP-N-acetyl-alpha-D-galactosamine:polypeptide N-acetylgalactosaminyltransferase 3
5361	377.333	0.00807431	NA	NA	3030	NA	NA	NA	208177	Phldb2	pleckstrin homology-like domain, family B, member 2
6294	381.667	0.00829148	NA	NA	NA	NA	NA	NA	218820	Zfp503	zinc finger protein 503
15633	391.333	0.00875467	NA	NA	NA	NA	NA	NA	77798	A930009A15Rik	RIKEN cDNA A930009A15 gene
12170	393.333	0.00883271	NA	NA	2619	NA	NA	NA	67141	Fbxo5	F-box protein 5
6128	397	0.00897693	NA	NA	NA	NA	NA	NA	21743	Inmt	indolethylamine N-methyltransferase
2748	400	0.00911266	NA	NA	NA	NA	NA	NA	14739	S1pr2	sphingosine-1-phosphate receptor 2
2363	401	0.00914998	4212	NA	NA	NA	NA	NA	140703	Emid1	EMI domain containing 1
1846	402	0.00921276	3823.67	NA	3463	NA	NA	NA	12841	Col9a3	collagen, type IX, alpha 3
11428	410.667	0.00966407	NA	NA	NA	NA	NA	NA	65970	Lima1	LIM domain and actin binding 1
1479	413.333	0.00982355	NA	NA	NA	NA	NA	NA	12236	Bub1b	budding uninhibited by benzimidazoles 1 homolog, beta (S. cerevisiae)
8096	414.333	0.00989481	4285	NA	3298	NA	NA	NA	24063	Spry1	sprouty homolog 1 (Drosophila)
4146	416	0.00997794	NA	NA	NA	NA	NA	NA	18231	Nxph1	neurexophilin 1
4017	417.667	0.0100424	2565.33	NA	NA	NA	NA	NA	18018	Nfatc1	nuclear factor of activated T-cells, cytoplasmic, calcineurin-dependent 1
2099	419.667	0.0101442	NA	NA	NA	NA	NA	NA	13417	Dnahc8	dynein, axonemal, heavy chain 8
13764	423	0.0103258	NA	NA	NA	NA	NA	NA	71096	Sntg1	syntrophin, gamma 1
12032	426	0.0105073	NA	NA	NA	NA	NA	NA	66929	Asf1b	ASF1 anti-silencing function 1 homolog B (S. cerevisiae)
1376	431.667	0.0108568	NA	NA	NA	NA	NA	NA	11989	Slc7a3	solute carrier family 7 (cationic amino acid transporter, y+ system), member 3
4746	437.667	0.0111741	NA	NA	NA	NA	NA	NA	19361	Rad51	RAD51 homolog (S. cerevisiae)
9611	441	0.0113845	NA	NA	NA	NA	NA	NA	338349	Cntln	centlein, centrosomal protein
12126	441	0.0113845	3588.67	NA	NA	NA	3682.33	NA	67071	Rps6ka6	ribosomal protein S6 kinase polypeptide 6
12449	444.667	0.0115999	NA	NA	NA	NA	NA	NA	67629	Spc24	SPC24, NDC80 kinetochore complex component, homolog (S. cerevisiae)
13347	447.333	0.0117424	NA	NA	NA	NA	NA	NA	69716	Trip13	thyroid hormone receptor interactor 13
795	451	0.0119562	NA	NA	3037	NA	NA	NA	109624	Cald1	caldesmon 1
8892	453	0.012036	NA	NA	NA	NA	NA	NA	27214	Dbf4	DBF4 homolog (S. cerevisiae)
7116	455	0.012153	NA	NA	NA	NA	NA	NA	228598	Ebf4	early B-cell factor 4
7832	455.333	0.01217	NA	NA	NA	NA	NA	NA	237877	Atad5	ATPase family, AAA domain containing 5
8101	456	0.0121971	NA	NA	NA	NA	NA	NA	24066	Spry4	sprouty homolog 4 (Drosophila)
6330	458	0.0122973	NA	NA	2283.67	NA	NA	NA	219140	Spata13	spermatogenesis associated 13
3105	460	0.0124245	5528.67	NA	3245	NA	NA	NA	15958	Ifit2	interferon-induced protein with tetratricopeptide repeats 2
12873	474.667	0.0133305	4329.33	NA	3326	NA	NA	NA	68481	Mpzl1	myelin protein zero-like 1
8044	475.667	0.0133831	NA	NA	NA	NA	NA	NA	240063	Zfp811	zinc finger protein 811
6382	480	0.0136749	NA	NA	NA	NA	NA	NA	21973	Top2a	topoisomerase (DNA) II alpha
8965	480.667	0.0137275	NA	NA	NA	NA	NA	NA	27401	Skp2	S-phase kinase-associated protein 2 (p45)
16221	485	0.0140143	NA	NA	NA	NA	NA	NA	97130	C77080	expressed sequence C77080
15776	487.333	0.0141551	NA	NA	2251.67	NA	NA	NA	78755	Fam122b	family with sequence similarity 122, member B
13936	489.333	0.0142704	NA	NA	NA	NA	NA	NA	71740	Pvrl4	poliovirus receptor-related 4
4460	490.333	0.0143485	NA	NA	NA	NA	NA	NA	19009	Pou6f1	POU domain, class 6, transcription factor 1
13453	491.333	0.0143977	NA	NA	NA	NA	NA	NA	70036	2700023E23Rik	RIKEN cDNA 2700023E23 gene
14149	492.333	0.0144995	NA	NA	NA	NA	NA	NA	72119	Tpx2	TPX2, microtubule-associated protein homolog (Xenopus laevis)
1734	493.333	0.0145572	NA	NA	NA	NA	NA	NA	12649	Chek1	checkpoint kinase 1 homolog (S. pombe)
8615	494	0.0145911	2938.67	NA	3994.33	NA	NA	NA	268301	Ankrd57	ankyrin repeat domain 57
5324	498	0.0148778	NA	NA	2333	NA	NA	NA	207742	Rnf43	ring finger protein 43
4054	498.333	0.0149016	4645	NA	2244.67	NA	NA	NA	18088	Nkx2-2	NK2 transcription factor related, locus 2 (Drosophila)
5897	500	0.0150322	NA	NA	NA	NA	NA	NA	215085	Slc35f1	solute carrier family 35, member F1
3751	500.333	0.0150543	NA	NA	2402.67	NA	NA	NA	17216	Mcm2	minichromosome maintenance deficient 2 mitotin (S. cerevisiae)
12047	505.667	0.0153393	NA	NA	NA	NA	NA	NA	66953	Cdca7	cell division cycle associated 7
2016	506	0.0153512	2510	NA	NA	NA	NA	NA	13132	Dab2	disabled homolog 2 (Drosophila)
7108	507.333	0.015453	NA	NA	NA	NA	2747	NA	228482	Arhgap11a	Rho GTPase activating protein 11A
7501	508	0.015492	NA	NA	NA	NA	NA	NA	232943	Klc3	kinesin light chain 3
3258	518.333	0.0161741	NA	NA	NA	NA	NA	NA	16439	Itpr2	inositol 1,4,5-triphosphate receptor 2
2307	521	0.0163845	3051	NA	NA	NA	NA	NA	14011	Etv6	ets variant gene 6 (TEL oncogene)
5333	523	0.01651	NA	NA	NA	NA	NA	NA	207798	Gramd1c	GRAM domain containing 1C
15137	525	0.016639	NA	NA	NA	NA	NA	NA	75590	Dusp9	dual specificity phosphatase 9
5608	526	0.0167085	NA	NA	NA	NA	NA	NA	211468	Kcnh8	potassium voltage-gated channel, subfamily H (eag-related), member 8
686	528	0.0168578	NA	NA	NA	NA	NA	NA	108176	Npm3-ps1	nucleoplasmin 3, pseudogene 1
1701	528.667	0.0169104	2556.33	NA	NA	NA	NA	NA	12579	Cdkn2b	cyclin-dependent kinase inhibitor 2B (p15, inhibits CDK4)
7937	530.333	0.0170411	NA	NA	NA	NA	2257.67	NA	239114	Il17d	interleukin 17D
16266	533.333	0.0172362	4641.67	NA	NA	NA	3194.33	NA	98496	5033414K04Rik	RIKEN cDNA 5033414K04 gene
2072	533.667	0.0172735	NA	NA	NA	NA	NA	NA	13361	Dhfr	dihydrofolate reductase
5433	533.667	0.0172735	NA	NA	NA	NA	NA	NA	20878	Aurka	aurora kinase A
512	536.333	0.0174364	NA	NA	NA	NA	NA	NA	106522	Pkdcc	protein kinase domain containing, cytoplasmic
12191	536.333	0.0174364	NA	NA	NA	NA	2229.33	NA	67177	Cdt1	chromatin licensing and DNA replication factor 1
13595	537.333	0.0175059	NA	NA	2209	NA	NA	NA	70536	Qpct	glutaminyl-peptide cyclotransferase (glutaminyl cyclase)
5072	538	0.017545	4301.33	NA	3316.33	NA	5536.33	NA	20409	Ostf1	osteoclast stimulating factor 1
6077	539.333	0.0176111	3648	NA	3627.67	NA	NA	NA	217069	Trim25	tripartite motif-containing 25
14314	542.333	0.0177825	NA	NA	NA	NA	NA	NA	72599	Pdia5	protein disulfide isomerase associated 5
572	542.667	0.0178029	NA	NA	NA	NA	NA	NA	107351	Kank1	KN motif and ankyrin repeat domains 1
3683	542.667	0.0178029	NA	NA	NA	NA	NA	NA	17132	Maf	avian musculoaponeurotic fibrosarcoma (v-maf) AS42 oncogene homolog
15185	543.667	0.0178554	NA	NA	NA	NA	NA	NA	75725	Phf14	PHD finger protein 14
7931	544.667	0.0179114	NA	NA	NA	NA	NA	NA	239027	Arhgap22	Rho GTPase activating protein 22
2366	545.667	0.0179844	3896	NA	3273	NA	NA	NA	140721	Caskin2	CASK-interacting protein 2
3754	546.333	0.0180081	NA	NA	3403	NA	3594	NA	17219	Mcm6	minichromosome maintenance deficient 6 (MIS5 homolog, S. pombe) (S. cerevisiae)
15247	551	0.0183203	3017.33	NA	NA	NA	NA	NA	75974	Dock11	dedicator of cytokinesis 11
7762	552.667	0.0184272	NA	NA	NA	NA	NA	NA	236193	Zfp709	zinc finger protein 709
5228	555	0.0186138	NA	NA	NA	NA	NA	NA	20667	Sox12	SRY-box containing gene 12
16098	558	0.0188174	3006	NA	NA	NA	NA	NA	93737	Pard6g	par-6 partitioning defective 6 homolog gamma (C. elegans)
5930	559.667	0.0189226	NA	NA	2659	NA	NA	NA	215690	Nav1	neuron navigator 1
2085	563	0.019172	NA	NA	NA	NA	NA	NA	13389	Dll3	delta-like 3 (Drosophila)
8374	563.333	0.0192009	NA	NA	NA	NA	2629	NA	245386	Fam70a	family with sequence similarity 70, member A
5567	564.667	0.0192942	2639	NA	NA	NA	NA	NA	210356	E030049G20Rik	RIKEN cDNA E030049G20 gene
13152	565	0.0193078	NA	NA	NA	NA	NA	NA	69195	Tmem121	transmembrane protein 121
10142	565.333	0.0193315	NA	NA	NA	NA	2475.33	NA	52276	Cdca8	cell division cycle associated 8
14854	569.333	0.019698	NA	NA	3012	NA	NA	NA	74464	Zswim5	zinc finger, SWIM domain containing 5
3700	570	0.0197387	NA	NA	NA	NA	NA	NA	17150	Mfap2	microfibrillar-associated protein 2
1703	575.667	0.0201188	2767.33	NA	NA	NA	3757.33	NA	12583	Cdo1	cysteine dioxygenase 1, cytosolic
2115	578	0.0202833	NA	NA	NA	NA	NA	NA	13448	Dok1	docking protein 1
5569	583.333	0.0206668	NA	NA	NA	NA	NA	NA	210417	Thsd7b	thrombospondin, type I, domain containing 7B
6237	584.333	0.020755	NA	NA	NA	NA	NA	NA	218311	Zfp455	zinc finger protein 455
16	588.667	0.0211045	NA	NA	NA	NA	NA	NA	100039282	100039282	predicted gene, 100039282
14777	590	0.0211995	NA	NA	NA	NA	2068	NA	74284	1700086L19Rik	RIKEN cDNA 1700086L19 gene
5277	592.667	0.0214031	3278	NA	NA	NA	NA	NA	207278	Fchsd2	FCH and double SH3 domains 2
9004	595.667	0.0216254	NA	NA	3771	NA	3013	NA	277353	Tcfl5	transcription factor-like 5 (basic helix-loop-helix)
8394	598	0.0218171	NA	NA	NA	NA	NA	NA	245631	Mum1l1	melanoma associated antigen (mutated) 1-like 1
4873	599	0.0218901	2091	NA	NA	NA	NA	NA	19771	Rlbp1	retinaldehyde binding protein 1
13633	602	0.0221123	NA	NA	NA	NA	NA	NA	70645	Oip5	Opa interacting protein 5
4272	602.333	0.0221378	NA	NA	NA	NA	NA	NA	18576	Pde3b	phosphodiesterase 3B, cGMP-inhibited
11618	603.333	0.0221955	NA	NA	NA	NA	NA	NA	66336	Cenpp	centromere protein P
9350	603.667	0.0222209	NA	NA	NA	NA	NA	NA	320438	Alg6	asparagine-linked glycosylation 6 homolog (yeast, alpha-1,3,-glucosyltransferase)
15859	606	0.0224024	NA	NA	NA	NA	NA	NA	80285	Parp9	poly (ADP-ribose) polymerase family, member 9
4007	607	0.0224822	NA	NA	NA	NA	2398.67	NA	18005	Nek2	NIMA (never in mitosis gene a)-related expressed kinase 2
13739	608	0.0225789	NA	NA	NA	NA	NA	NA	70998	Phf6	PHD finger protein 6
2041	609.333	0.0227129	3884.33	NA	NA	NA	2904	NA	13180	Pcbd1	pterin 4 alpha carbinolamine dehydratase/dimerization cofactor of hepatocyte nuclear factor 1 alpha (TCF1) 1
4034	610	0.0227774	2992	NA	NA	NA	NA	NA	18037	Nfkbie	nuclear factor of kappa light polypeptide gene enhancer in B-cells inhibitor, epsilon
8103	613.667	0.0231388	NA	NA	NA	NA	NA	NA	240665	Ccnj	cyclin J
16114	614.667	0.0232253	NA	NA	2545	NA	NA	NA	93837	Dach2	dachshund 2 (Drosophila)
5015	618	0.0234628	NA	NA	NA	NA	NA	NA	20321	Frrs1	ferric-chelate reductase 1
2084	625.333	0.0240193	NA	NA	2868.33	NA	NA	NA	13388	Dll1	delta-like 1 (Drosophila)
2390	626.667	0.0241602	2679.33	NA	NA	NA	NA	NA	140887	Lnx2	ligand of numb-protein X 2
6007	627.667	0.0242331	5602.33	NA	4323.67	NA	NA	NA	21664	Phlda1	pleckstrin homology-like domain, family A, member 1
6308	627.667	0.0242331	NA	NA	NA	NA	NA	NA	218973	Wdhd1	WD repeat and HMG-box DNA binding protein 1
10649	629.667	0.0243875	NA	NA	NA	NA	NA	NA	56307	Metap2	methionine aminopeptidase 2
4679	630.333	0.0244265	NA	NA	NA	NA	NA	NA	19277	Ptpro	protein tyrosine phosphatase, receptor type, O
2343	631.667	0.0245436	3087.67	NA	3881	NA	NA	NA	14056	Ezh2	enhancer of zeste homolog 2 (Drosophila)
1324	633	0.0246607	NA	NA	NA	NA	NA	NA	11877	Arvcf	armadillo repeat gene deleted in velo-cardio-facial syndrome
10074	633.333	0.0246929	4627	NA	2210	NA	NA	NA	50913	Olig2	oligodendrocyte transcription factor 2
14650	635.333	0.0248914	2899.33	NA	NA	NA	NA	NA	74051	Steap2	six transmembrane epithelial antigen of prostate 2
4511	637.333	0.0250577	NA	NA	NA	NA	NA	NA	19092	Prkg2	protein kinase, cGMP-dependent, type II
3753	637.667	0.0251018	NA	NA	NA	NA	NA	NA	17218	Mcm5	minichromosome maintenance deficient 5, cell division cycle 46 (S. cerevisiae)
14217	641	0.0253784	3305	NA	NA	NA	NA	NA	72301	1810041L15Rik	RIKEN cDNA 1810041L15 gene
9720	643.333	0.0255803	NA	NA	NA	NA	NA	NA	381280	6430706D22Rik	RIKEN cDNA 6430706D22 gene
4070	648.333	0.0260078	NA	NA	NA	NA	NA	NA	18109	Mycn	v-myc myelocytomatosis viral related oncogene, neuroblastoma derived (avian)
13192	651.333	0.0263251	NA	NA	NA	NA	NA	NA	69309	Slc16a13	solute carrier family 16 (monocarboxylic acid transporters), member 13
7916	652.667	0.0264337	3526	NA	3963	NA	NA	NA	238799	Tnpo1	transportin 1
4092	654	0.0265592	NA	NA	NA	NA	NA	NA	18142	Npas1	neuronal PAS domain protein 1
5289	654	0.0265592	NA	NA	NA	NA	NA	NA	207393	Elfn2	leucine rich repeat and fibronectin type III, extracellular 2
8212	655.667	0.026661	NA	NA	NA	NA	NA	NA	242506	Frmd3	FERM domain containing 3
1699	656.333	0.0266983	NA	NA	NA	NA	NA	NA	12577	Cdkn1c	cyclin-dependent kinase inhibitor 1C (P57)
5973	656.667	0.0267238	NA	NA	2259.33	NA	NA	NA	216188	Aldh1l2	aldehyde dehydrogenase 1 family, member L2
13999	656.667	0.0267238	3133.33	NA	NA	NA	3701	NA	71846	Syce2	synaptonemal complex central element protein 2
1757	659.333	0.026963	NA	NA	NA	NA	NA	NA	12702	Socs3	suppressor of cytokine signaling 3
3657	659.333	0.026963	4870.33	NA	NA	NA	2905.33	NA	17118	Marcks	myristoylated alanine rich protein kinase C substrate
13177	659.333	0.026963	3273.33	NA	4185	NA	NA	NA	69270	Gins1	GINS complex subunit 1 (Psf1 homolog)
6503	669.667	0.0278622	3541.33	NA	4521.33	NA	NA	NA	22235	Ugdh	UDP-glucose dehydrogenase
4371	670	0.027886	NA	NA	1827.67	NA	NA	NA	18761	Prkcq	protein kinase C, theta
8381	671	0.0279539	NA	NA	NA	NA	2363.33	NA	245468	Pnma3	paraneoplastic antigen MA3
7462	672.667	0.0280947	NA	NA	NA	NA	2176.33	NA	232441	Rerg	RAS-like, estrogen-regulated, growth-inhibitor
4823	673	0.0281303	4224.67	NA	NA	NA	3313	NA	19672	Rcn1	reticulocalbin 1
8737	673	0.0281303	NA	NA	NA	NA	2352.33	NA	26934	Racgap1	Rac GTPase-activating protein 1
1606	676.667	0.0284968	NA	NA	NA	NA	2138.33	NA	12448	Ccne2	cyclin E2
8207	677.667	0.0285833	5138.33	NA	3481	NA	NA	NA	242466	Zfp462	zinc finger protein 462
164	679	0.0287122	NA	NA	NA	NA	NA	NA	100515	Zfp518b	zinc finger protein 518B
9692	679.333	0.0287547	NA	NA	3344.67	NA	NA	NA	380916	Lrch1	leucine-rich repeats and calponin homology (CH) domain containing 1
15193	681	0.028904	NA	NA	2262.67	NA	NA	NA	75746	Morc4	microrchidia 4
2323	687	0.029469	2537	NA	4619.67	NA	NA	NA	14048	Eya1	eyes absent 1 homolog (Drosophila)
9617	691.667	0.0298846	NA	NA	2939	NA	NA	NA	338362	Ust	uronyl-2-sulfotransferase
9885	691.667	0.0298846	NA	NA	3544.67	NA	NA	NA	408022	Ccdc111	coiled-coil domain containing 111
13597	695.333	0.0302664	NA	NA	NA	NA	2164.67	NA	70546	Zdhhc2	zinc finger, DHHC domain containing 2
6082	703.333	0.0310248	5627	NA	NA	NA	NA	NA	217125	Samd14	sterile alpha motif domain containing 14
232	703.667	0.0310621	NA	NA	2898.33	NA	NA	NA	101700	Trim68	tripartite motif-containing 68
13534	706	0.0312521	NA	NA	NA	NA	2205.67	NA	70357	Kcnip1	Kv channel-interacting protein 1
14491	706	0.0312521	NA	NA	NA	NA	NA	NA	73341	Arhgef6	Rac/Cdc42 guanine nucleotide exchange factor (GEF) 6
5420	710	0.0316322	NA	NA	NA	NA	NA	NA	20868	Stk10	serine/threonine kinase 10
12644	710.333	0.0316627	NA	NA	NA	NA	NA	NA	67946	Spata6	spermatogenesis associated 6
12674	713	0.0319036	NA	NA	NA	NA	NA	NA	68014	Zwilch	Zwilch, kinetochore associated, homolog (Drosophila)
551	714.333	0.0320309	NA	NA	NA	NA	NA	NA	107065	Lrrtm2	leucine rich repeat transmembrane neuronal 2
6127	716	0.0321904	2804	NA	NA	NA	NA	NA	217410	Trib2	tribbles homolog 2 (Drosophila)
11600	716	0.0321904	3208.67	NA	4661.67	NA	NA	NA	66307	Isoc1	isochorismatase domain containing 1
5464	716.333	0.0322277	NA	NA	NA	NA	NA	NA	209086	Samd9l	sterile alpha motif domain containing 9-like
15204	716.333	0.0322277	NA	NA	NA	NA	NA	NA	75769	4833424O15Rik	RIKEN cDNA 4833424O15 gene
8823	716.667	0.0322701	NA	NA	NA	NA	NA	NA	270084	Lpcat2	lysophosphatidylcholine acyltransferase 2
10221	717	0.0323091	NA	NA	NA	NA	NA	NA	52864	Btbd12	BTB (POZ) domain containing 12
10158	721	0.0327011	NA	NA	NA	NA	NA	NA	52463	Tet1	tet oncogene 1
6750	724.333	0.0330268	NA	NA	NA	NA	NA	NA	224893	BC011426	cDNA sequence BC011426
608	725.667	0.0331982	NA	NA	NA	NA	NA	NA	107746	Rapgef1	Rap guanine nucleotide exchange factor (GEF) 1
15259	725.667	0.0331982	NA	NA	2338	NA	NA	NA	76044	Ncapg2	non-SMC condensin II complex, subunit G2
9276	730.667	0.0336529	NA	NA	NA	NA	NA	NA	319922	Vwc2	von Willebrand factor C domain containing 2
13474	735.333	0.0340668	NA	NA	2694	NA	NA	NA	70099	Smc4	structural maintenance of chromosomes 4
16308	735.667	0.034094	3656.67	NA	3580.67	NA	NA	NA	99382	Abtb2	ankyrin repeat and BTB (POZ) domain containing 2
6973	737.667	0.0343112	4446.33	NA	2987	NA	NA	NA	22701	Zfp41	zinc finger protein 41
9919	738.333	0.034357	NA	NA	NA	NA	NA	NA	432769	Zfp708	zinc finger protein 708
8634	739	0.0344265	NA	NA	NA	NA	NA	NA	268510	Mgat5b	mannoside acetylglucosaminyltransferase 5, isoenzyme B
4882	739.667	0.0344876	4009.67	NA	NA	NA	NA	NA	19876	Robo1	roundabout homolog 1 (Drosophila)
12327	740.333	0.0345351	NA	NA	NA	NA	NA	NA	67419	3632451O06Rik	RIKEN cDNA 3632451O06 gene
13808	741.333	0.03462	2049.33	NA	NA	NA	NA	NA	71263	Mro	maestro
1517	741.667	0.0346488	NA	NA	NA	NA	2122.67	NA	12308	Calb2	calbindin 2
4506	743.667	0.034866	NA	NA	NA	NA	NA	NA	19087	Prkar2a	protein kinase, cAMP dependent regulatory, type II alpha
14487	743.667	0.034866	NA	NA	NA	NA	NA	NA	73332	1700041C02Rik	RIKEN cDNA 1700041C02 gene
8390	747.333	0.0352545	NA	NA	NA	NA	NA	NA	245595	Zfp711	zinc finger protein 711
7846	754	0.0358839	NA	NA	NA	NA	NA	NA	23794	Adamts5	a disintegrin-like and metallopeptidase (reprolysin type) with thrombospondin type 1 motif, 5 (aggrecanase-2)
9402	766.667	0.0371683	NA	NA	2342.33	NA	NA	NA	320790	Chd7	chromodomain helicase DNA binding protein 7
7822	767	0.0372005	NA	NA	NA	NA	NA	NA	237775	BC050078	cDNA sequence BC050078
8274	768.333	0.0373142	NA	NA	NA	NA	2132.33	NA	243499	Lrrtm4	leucine rich repeat transmembrane neuronal 4
14425	768.333	0.0373142	NA	NA	NA	NA	1926	NA	73072	BC068157	cDNA sequence BC068157
5876	770	0.0374805	2766.67	NA	4239.67	NA	NA	NA	214804	Syde2	synapse defective 1, Rho GTPase, homolog 2 (C. elegans)
1690	770.333	0.037511	NA	NA	NA	NA	NA	NA	12566	Cdk2	cyclin-dependent kinase 2
13872	771.333	0.0376196	6418	NA	2305	NA	NA	NA	71529	9030409G11Rik	RIKEN cDNA 9030409G11 gene
634	774.667	0.0379691	NA	NA	3183.33	NA	3582.33	NA	107995	Cdc20	cell division cycle 20 homolog (S. cerevisiae)
9796	774.667	0.0379691	NA	NA	NA	NA	1882.33	NA	382089	Ripply2	ripply2 homolog (zebrafish)
4436	776	0.0381252	NA	NA	NA	NA	NA	NA	18968	Pola1	polymerase (DNA directed), alpha 1
5845	779.333	0.0384289	NA	NA	NA	NA	NA	NA	214424	Parp16	poly (ADP-ribose) polymerase family, member 16
15305	780	0.0385103	1987.33	NA	NA	NA	NA	NA	76261	0610040J01Rik	RIKEN cDNA 0610040J01 gene
2602	781.333	0.0386444	4051.67	NA	3769.67	NA	NA	NA	14453	Gas2	growth arrest specific 2
3499	785.667	0.0391432	4070.33	NA	NA	NA	3096.67	NA	16924	Lnx1	ligand of numb-protein X 1
3664	789.667	0.0395775	NA	NA	NA	NA	NA	NA	17121	Mxd3	Max dimerization protein 3
12816	793.333	0.0399813	NA	NA	NA	NA	NA	NA	68298	Ncapd2	non-SMC condensin I complex, subunit D2
1742	803.333	0.0410248	NA	NA	NA	NA	NA	NA	12661	Chl1	cell adhesion molecule with homology to L1CAM
3609	805.333	0.0412708	NA	NA	NA	NA	NA	NA	170771	Khdrbs2	KH domain containing, RNA binding, signal transduction associated 2
5136	810	0.0418069	NA	NA	NA	NA	2138.33	NA	20510	Slc1a1	solute carrier family 1 (neuronal/epithelial high affinity glutamate transporter, system Xag), member 1
5914	810.333	0.0418375	5245.33	NA	NA	NA	2687.33	NA	215378	Fam5c	family with sequence similarity 5, member C
882	815.667	0.0424279	NA	NA	NA	NA	NA	NA	110637	Grik4	glutamate receptor, ionotropic, kainate 4
4931	817.667	0.0426247	3567.67	NA	NA	NA	NA	NA	20183	Rxrg	retinoid X receptor gamma
8881	832	0.044228	NA	NA	NA	NA	1852.67	NA	271786	Galnt13	UDP-N-acetyl-alpha-D-galactosamine:polypeptide N-acetylgalactosaminyltransferase 13
10358	840.333	0.04519	NA	NA	NA	NA	NA	NA	54169	Myst4	MYST histone acetyltransferase monocytic leukemia 4
11084	842.667	0.045492	2326	NA	NA	NA	NA	NA	58250	Chst11	carbohydrate sulfotransferase 11
14986	842.667	0.045492	NA	NA	NA	NA	2055.33	NA	75033	4930486G11Rik	RIKEN cDNA 4930486G11 gene
5442	844.333	0.0456973	2922.33	NA	NA	NA	NA	NA	208898	Unc13c	unc-13 homolog C (C. elegans)
7966	846.333	0.0458568	3703	NA	4579	NA	NA	NA	23939	Mapk7	mitogen-activated protein kinase 7
14042	849.333	0.0462436	2934	NA	3634.33	NA	NA	NA	71918	Zcchc24	zinc finger, CCHC domain containing 24
2250	855.667	0.0469579	4162	NA	2826	NA	NA	NA	13824	Epb4.1l4a	erythrocyte protein band 4.1-like 4a
4784	857.667	0.0471853	NA	NA	3229	NA	NA	NA	194237	Rimkla	ribosomal modification protein rimK-like family member A
287	859	0.0473261	NA	NA	NA	NA	NA	NA	102657	Cd276	CD276 antigen
10322	861.333	0.0475484	3110.67	NA	NA	NA	NA	NA	53902	Rcan3	regulator of calcineurin 3
7234	862.667	0.0477027	4674.33	NA	4252.33	NA	4745	NA	229937	Znhit6	zinc finger, HIT type 6
14437	867.333	0.0482643	4341.67	NA	3458	NA	5437.67	NA	73124	Golim4	golgi integral membrane protein 4
727	867.667	0.0483034	4691.67	NA	4136	NA	4814.33	NA	108911	Rcc2	regulator of chromosome condensation 2
2272	869.333	0.0484798	5618.67	NA	2587.33	NA	NA	NA	13855	Epn2	epsin 2
2789	870.333	0.048602	NA	NA	4085.67	NA	2529	NA	14805	Grik1	glutamate receptor, ionotropic, kainate 1
7791	872.333	0.0488395	NA	NA	4196	NA	NA	NA	237222	Ofd1	oral-facial-digital syndrome 1 gene homolog (human)
4134	874.667	0.0491127	5235.33	NA	NA	NA	NA	NA	18212	Ntrk2	neurotrophic tyrosine kinase, receptor, type 2
9456	875.333	0.0491669	NA	NA	NA	NA	NA	NA	328110	Prpf39	PRP39 pre-mRNA processing factor 39 homolog (yeast)
6337	880	0.0496658	NA	NA	2317.67	NA	NA	NA	21917	Tmpo	thymopoietin
2353	880.667	0.0497659	2307.67	NA	NA	NA	NA	NA	14062	F2r	coagulation factor II (thrombin) receptor
13664	881.667	0.0498914	NA	NA	1820.67	NA	NA	NA	70784	Rasl12	RAS-like, family 12

## Sheet: Astrocyte - Table 1
Row	OPC_SI	OPC_pSI	Astrocyte_SI	Astrocyte_pSI	Oligodendroctye_SI	Oligodendrocyte_pSI	Neuron_SI	Neuron_pSI	Entrez	Symbol	Name
10596	NA	NA	2.66667	4.39625e-06	NA	NA	NA	NA	56188	Fxyd1	FXYD domain-containing ion transport regulator 1
57	NA	NA	7.66667	1.02579e-05	NA	NA	NA	NA	100040792	OTTMUSG00000002879	predicted gene, OTTMUSG00000002879
7433	NA	NA	9.33333	1.7585e-05	NA	NA	NA	NA	232146	Fam176a	family with sequence similarity 176, member A
11047	NA	NA	11	1.90504e-05	NA	NA	NA	NA	58187	Cldn10	claudin 10
5137	NA	NA	12.6667	2.05158e-05	NA	NA	NA	NA	20511	Slc1a2	solute carrier family 1 (glial high affinity glutamate transporter), member 2
84	NA	NA	16.3333	2.34467e-05	NA	NA	NA	NA	100042178	OTTMUSG00000010446	predicted gene, OTTMUSG00000010446
10805	NA	NA	18	2.63775e-05	NA	NA	NA	NA	56615	Mgst1	microsomal glutathione S-transferase 1
10925	NA	NA	20.3333	3.517e-05	NA	NA	NA	NA	57265	Fzd2	frizzled homolog 2 (Drosophila)
9146	NA	NA	24.3333	3.81008e-05	NA	NA	NA	NA	30794	Pdlim4	PDZ and LIM domain 4
2795	NA	NA	25	3.95662e-05	NA	NA	NA	NA	14813	Grin2c	glutamate receptor, ionotropic, NMDA2C (epsilon 3)
15368	NA	NA	28.3333	4.68933e-05	NA	NA	NA	NA	76487	Ppp1r3g	protein phosphatase 1, regulatory (inhibitor) subunit 3G
13168	NA	NA	34	5.56858e-05	NA	NA	NA	NA	69239	2610034M16Rik	RIKEN cDNA 2610034M16 gene
5531	NA	NA	41.6667	8.64596e-05	NA	NA	NA	NA	20971	Sdc4	syndecan 4
1641	NA	NA	42.3333	8.7925e-05	NA	NA	NA	NA	12496	Entpd2	ectonucleoside triphosphate diphosphohydrolase 2
3088	NA	NA	45.6667	0.000102579	NA	NA	NA	NA	15903	Id3	inhibitor of DNA binding 3
3443	NA	NA	46	0.000108441	NA	NA	NA	NA	16816	Lcat	lecithin cholesterol acyltransferase
526	NA	NA	46.3333	0.000112837	NA	NA	NA	NA	106648	Cyp4f15	cytochrome P450, family 4, subfamily f, polypeptide 15
9774	NA	NA	46.3333	0.000112837	NA	NA	NA	NA	381914	B230311B06Rik	RIKEN cDNA B230311B06 gene
540	NA	NA	47.3333	0.000123095	NA	NA	NA	NA	106878	2010002N04Rik	RIKEN cDNA 2010002N04 gene
12847	NA	NA	50.6667	0.000133353	NA	NA	NA	NA	68396	Cml4	camello-like 4
4619	NA	NA	54	0.000145076	NA	NA	NA	NA	192216	Tmem47	transmembrane protein 47
9995	NA	NA	59.3333	0.000177315	NA	NA	NA	NA	50500	Ttpa	tocopherol (alpha) transfer protein
16264	NA	NA	59.3333	0.000177315	NA	NA	NA	NA	98452	AI848258	expressed sequence AI848258
4404	NA	NA	59.6667	0.000178781	NA	NA	NA	NA	18802	Plcd4	phospholipase C, delta 4
2096	NA	NA	61	0.000189039	NA	NA	NA	NA	13406	Dmp1	dentin matrix protein 1
12844	2060.33	NA	61.3333	0.0001949	NA	NA	NA	NA	68385	Tlcd1	TLC domain containing 1
10652	NA	NA	62.3333	0.000205158	NA	NA	NA	NA	56312	Nupr1	nuclear protein 1
286	NA	NA	63.6667	0.000218347	NA	NA	NA	NA	102644	Oaf	OAF homolog (Drosophila)
10678	NA	NA	65.6667	0.000225674	NA	NA	NA	NA	56358	Copz2	coatomer protein complex, subunit zeta 2
13087	NA	NA	68.3333	0.000233001	NA	NA	NA	NA	69049	Cml5	camello-like 5
4138	NA	NA	70.6667	0.000254982	NA	NA	NA	NA	18217	Ntsr2	neurotensin receptor 2
10169	NA	NA	71.6667	0.000254982	NA	NA	NA	NA	52538	Acaa2	acetyl-Coenzyme A acyltransferase 2 (mitochondrial 3-oxoacyl-Coenzyme A thiolase)
6064	NA	NA	72.3333	0.000259379	NA	NA	NA	NA	216974	4933404M19Rik	RIKEN cDNA 4933404M19 gene
9826	NA	NA	74.3333	0.000284291	NA	NA	NA	NA	384071	Slc25a34	solute carrier family 25, member 34
15908	NA	NA	74.6667	0.000284291	NA	NA	NA	NA	80888	Hspb8	heat shock protein 8
2416	NA	NA	75.3333	0.000287222	NA	NA	NA	NA	14132	Fcgrt	Fc receptor, IgG, alpha chain transporter
9010	NA	NA	78	0.000301876	NA	NA	NA	NA	277468	Slc39a12	solute carrier family 39 (zinc transporter), member 12
9187	NA	NA	82.6667	0.000334115	NA	NA	NA	NA	30956	Aass	aminoadipate-semialdehyde synthase
1284	NA	NA	84.3333	0.000342907	NA	NA	NA	NA	11829	Aqp4	aquaporin 4
14064	NA	NA	88.6667	0.000376612	NA	NA	NA	NA	71962	2410008K03Rik	RIKEN cDNA 2410008K03 gene
2681	NA	NA	90.3333	0.000392732	NA	NA	NA	NA	14623	Gjb6	gap junction protein, beta 6
4529	NA	NA	91.3333	0.000411782	NA	NA	NA	NA	19125	Prodh	proline dehydrogenase
2496	NA	NA	93.3333	0.000427902	NA	NA	NA	NA	14261	Fmo1	flavin containing monooxygenase 1
5615	NA	NA	93.3333	0.000427902	NA	NA	NA	NA	211550	Tifa	TRAF-interacting protein with forkhead-associated domain
14095	NA	NA	93.6667	0.000429367	NA	NA	NA	NA	72014	Btbd17	BTB (POZ) domain containing 17
13973	NA	NA	94.6667	0.000436694	NA	NA	NA	NA	71803	Slc25a18	solute carrier family 25 (mitochondrial carrier), member 18
6446	NA	NA	95.3333	0.000444021	NA	NA	NA	NA	22117	Tst	thiosulfate sulfurtransferase, mitochondrial
5414	NA	NA	98.3333	0.000467468	NA	NA	NA	NA	208659	Fam20a	family with sequence similarity 20, member A
3086	NA	NA	98.6667	0.000468933	NA	NA	NA	NA	15901	Id1	inhibitor of DNA binding 1
6523	NA	NA	99.6667	0.000473329	NA	NA	NA	NA	22271	Upp1	uridine phosphorylase 1
2524	NA	NA	101.333	0.000493845	NA	NA	NA	NA	142980	Tlr3	toll-like receptor 3
3242	NA	NA	102	0.000504103	NA	NA	NA	NA	16419	Itgb5	integrin beta 5
10319	NA	NA	102.667	0.000504103	NA	NA	NA	NA	53896	Slc7a10	solute carrier family 7 (cationic amino acid transporter, y+ system), member 10
2077	NA	NA	103.333	0.000509965	NA	NA	NA	NA	13371	Dio2	deiodinase, iodothyronine, type II
3619	NA	NA	103.667	0.000514361	NA	NA	NA	NA	170790	Mlc1	megalencephalic leukoencephalopathy with subcortical cysts 1 homolog (human)
11496	NA	NA	104.333	0.000521688	NA	NA	NA	NA	66141	Ifitm3	interferon induced transmembrane protein 3
623	NA	NA	104.667	0.000524619	2458.33	NA	NA	NA	107869	Cth	cystathionase (cystathionine gamma-lyase)
3962	NA	NA	104.667	0.000524619	NA	NA	NA	NA	17926	Myoc	myocilin
11024	NA	NA	108.333	0.00056272	NA	NA	NA	NA	57875	Angptl4	angiopoietin-like 4
5668	2111	NA	110	0.000580305	NA	NA	NA	NA	212539	Gm266	gene model 266, (NCBI)
13011	2307.33	NA	111	0.000583236	NA	NA	NA	NA	68841	1110054M08Rik	RIKEN cDNA 1110054M08 gene
2175	NA	NA	116.333	0.000619871	NA	NA	NA	NA	13609	S1pr1	sphingosine-1-phosphate receptor 1
3792	NA	NA	118.667	0.00065211	NA	NA	NA	NA	17289	Mertk	c-mer proto-oncogene tyrosine kinase
15900	NA	NA	119	0.000656506	NA	NA	NA	NA	80876	Ifitm2	interferon induced transmembrane protein 2
4894	NA	NA	120.667	0.000684349	NA	NA	NA	NA	19892	Rpe65	retinal pigment epithelium 65
13945	NA	NA	124	0.000716589	NA	NA	NA	NA	71760	Agxt2l1	alanine-glyoxylate aminotransferase 2-like 1
4826	NA	NA	124.333	0.000719519	NA	NA	NA	NA	19682	Rdh5	retinol dehydrogenase 5
1738	2271.33	NA	126.333	0.000750293	NA	NA	NA	NA	12654	Chi3l1	chitinase 3-like 1
16217	NA	NA	126.333	0.000750293	NA	NA	NA	NA	97064	Wwtr1	WW domain containing transcription regulator 1
284	NA	NA	126.667	0.000754689	NA	NA	NA	NA	102626	Mapkapk3	mitogen-activated protein kinase-activated protein kinase 3
9888	NA	NA	127.667	0.000760551	NA	NA	NA	NA	408064	BC064078	cDNA sequence BC064078
7190	NA	NA	130	0.000797186	NA	NA	NA	NA	229534	Pbxip1	pre-B-cell leukemia transcription factor interacting protein 1
2689	NA	NA	130.667	0.000807444	NA	NA	NA	NA	14634	Gli3	GLI-Kruppel family member GLI3
5438	NA	NA	134	0.000847011	NA	NA	NA	NA	20887	Sult1a1	sulfotransferase family 1A, phenol-preferring, member 1
11098	NA	NA	134.333	0.000849941	3280	NA	NA	NA	58807	Slco1c1	solute carrier organic anion transporter family, member 1c1
11350	NA	NA	139.333	0.000907093	NA	NA	NA	NA	64385	Cyp4f14	cytochrome P450, family 4, subfamily f, polypeptide 14
4815	NA	NA	140.333	0.000915885	NA	NA	NA	NA	19659	Rbp1	retinol binding protein 1, cellular
13774	2055.67	NA	141.333	0.000929074	NA	NA	NA	NA	71137	Rfx4	regulatory factor X, 4 (influences HLA class II expression)
1115	NA	NA	142.667	0.000946659	NA	NA	NA	NA	11606	Agt	angiotensinogen (serpin peptidase inhibitor, clade A, member 8)
4333	NA	NA	142.667	0.000946659	NA	NA	NA	NA	18682	Phkg1	phosphorylase kinase gamma 1
8902	2848	NA	142.667	0.000946659	NA	NA	NA	NA	27226	Pla2g7	phospholipase A2, group VII (platelet-activating factor acetylhydrolase, plasma)
10759	NA	NA	142.667	0.000946659	NA	NA	NA	NA	56473	Fads2	fatty acid desaturase 2
8305	NA	NA	144.333	0.000961313	NA	NA	NA	NA	243914	Lgi4	leucine-rich repeat LGI family, member 4
1274	NA	NA	147.333	0.000990621	NA	NA	NA	NA	11814	Apoc3	apolipoprotein C-III
9860	NA	NA	150	0.00103605	NA	NA	NA	NA	402728	Pax6os1	Pax6 opposite strand transcript 1
13037	NA	NA	151	0.00104191	NA	NA	NA	NA	68922	Dnaic1	dynein, axonemal, intermediate chain 1
1752	NA	NA	151.333	0.00104338	NA	NA	NA	NA	12684	Cideb	cell death-inducing DNA fragmentation factor, alpha subunit-like effector B
2230	NA	NA	157.667	0.00111518	NA	NA	NA	NA	13731	Emp2	epithelial membrane protein 2
6578	NA	NA	162.333	0.00120311	NA	NA	NA	NA	22350	Ezr	ezrin
8506	NA	NA	163.333	0.00122509	NA	NA	NA	NA	26362	Axl	AXL receptor tyrosine kinase
14071	NA	NA	166	0.00127052	NA	NA	NA	NA	71973	Rbpms2	RNA binding protein with multiple splicing 2
2677	NA	NA	166.667	0.00127784	NA	NA	NA	NA	14619	Gjb2	gap junction protein, beta 2
6334	NA	NA	166.667	0.00127784	NA	NA	NA	NA	219151	Scara3	scavenger receptor class A, member 3
6558	NA	NA	169.667	0.0013306	NA	NA	NA	NA	223332	Ranbp3l	RAN binding protein 3-like
2647	NA	NA	170.333	0.00134672	NA	NA	NA	NA	14579	Gem	GTP binding protein (gene overexpressed in skeletal muscle)
3949	NA	NA	173	0.00138482	NA	NA	NA	NA	17906	Myl2	myosin, light polypeptide 2, regulatory, cardiac, slow
266	NA	NA	175.333	0.00141706	NA	NA	NA	NA	102294	Cyp4v3	cytochrome P450, family 4, subfamily v, polypeptide 3
647	NA	NA	176.333	0.00143611	NA	NA	NA	NA	108052	Slc14a1	solute carrier family 14 (urea transporter), member 1
8478	NA	NA	177	0.0014493	NA	NA	NA	NA	257635	Sdsl	serine dehydratase-like
8581	NA	NA	177.667	0.00146249	NA	NA	NA	NA	26457	Slc27a1	solute carrier family 27 (fatty acid transporter), member 1
14426	NA	NA	177.667	0.00146249	NA	NA	NA	NA	73075	Ppil6	peptidylprolyl isomerase (cyclophilin)-like 6
10987	NA	NA	180.667	0.00152989	NA	NA	NA	NA	57738	Slc15a2	solute carrier family 15 (H+/peptide transporter), member 2
15407	NA	NA	180.667	0.00152989	NA	NA	NA	NA	76626	Msi2	Musashi homolog 2 (Drosophila)
10740	NA	NA	184	0.00158411	NA	NA	NA	NA	56448	Cyp2d22	cytochrome P450, family 2, subfamily d, polypeptide 22
3979	NA	NA	188.667	0.00167644	NA	NA	NA	NA	17960	Nat1	N-acetyltransferase 1 (arylamine N-acetyltransferase)
9544	NA	NA	189	0.00168083	NA	NA	NA	NA	330217	Gal3st4	galactose-3-O-sulfotransferase 4
16170	NA	NA	190	0.00169549	2333.33	NA	NA	NA	94180	Acsbg1	acyl-CoA synthetase bubblegum family member 1
2219	NA	NA	191	0.00171014	NA	NA	NA	NA	13711	Elf5	E74-like factor 5
13818	NA	NA	191.333	0.00172186	NA	NA	NA	NA	71306	Mfap3l	microfibrillar-associated protein 3-like
8748	NA	NA	196.667	0.00183177	3082.33	NA	NA	NA	26941	Slc9a3r1	solute carrier family 9 (sodium/hydrogen exchanger), member 3 regulator 1
11037	NA	NA	198.667	0.00188159	NA	NA	NA	NA	58175	Rgs20	regulator of G-protein signaling 20
2918	NA	NA	199.333	0.00189185	NA	NA	NA	NA	15203	Heph	hephaestin
13094	NA	NA	201.333	0.00191676	NA	NA	NA	NA	69068	1810011O10Rik	RIKEN cDNA 1810011O10 gene
2915	2369	NA	202	0.00192116	NA	NA	NA	NA	15200	Hbegf	heparin-binding EGF-like growth factor
5843	NA	NA	202	0.00192116	NA	NA	NA	NA	214359	Tmem51	transmembrane protein 51
12083	NA	NA	206.333	0.00201495	NA	NA	NA	NA	67009	Ttc23	tetratricopeptide repeat domain 23
16257	NA	NA	206.333	0.00201495	NA	NA	NA	NA	98396	Slc41a1	solute carrier family 41, member 1
1235	NA	NA	207	0.00202521	NA	NA	NA	NA	11761	Aox1	aldehyde oxidase 1
1590	NA	NA	207	0.00202521	NA	NA	NA	NA	12411	Cbs	cystathionine beta-synthase
13935	NA	NA	208.333	0.00203839	NA	NA	NA	NA	71738	Mamdc2	MAM domain containing 2
5138	2573	NA	209	0.00206184	4029.33	NA	NA	NA	20512	Slc1a3	solute carrier family 1 (glial high affinity glutamate transporter), member 3
9526	NA	NA	210.333	0.00209555	NA	NA	NA	NA	329910	Acot11	acyl-CoA thioesterase 11
8783	NA	NA	213.333	0.00213804	NA	NA	NA	NA	26968	Islr	immunoglobulin superfamily containing leucine-rich repeat
4591	NA	NA	213.667	0.00213951	NA	NA	NA	NA	192166	Sardh	sarcosine dehydrogenase
9884	NA	NA	214	0.00214097	NA	NA	NA	NA	407831	Tmem204	transmembrane protein 204
9257	NA	NA	216.333	0.00217614	NA	NA	NA	NA	319757	Smo	smoothened homolog (Drosophila)
1162	NA	NA	218.667	0.00221131	NA	NA	NA	NA	116847	Prelp	proline arginine-rich end leucine-rich repeat
3800	NA	NA	219	0.00221571	NA	NA	NA	NA	17304	Mfge8	milk fat globule-EGF factor 8 protein
8012	NA	NA	225	0.00237251	NA	NA	NA	NA	23972	Papss2	3'-phosphoadenosine 5'-phosphosulfate synthase 2
3229	NA	NA	228.667	0.00245604	NA	NA	NA	NA	16403	Itga6	integrin alpha 6
3593	NA	NA	234.333	0.00261284	NA	NA	NA	NA	170752	Bco2	beta-carotene oxygenase 2
15285	2394.67	NA	234.667	0.00262016	NA	NA	NA	NA	76187	Adhfe1	alcohol dehydrogenase, iron containing, 1
3768	1940.33	NA	236.333	0.00265973	NA	NA	NA	NA	17242	Mdk	midkine
1453	NA	NA	238.667	0.00271102	NA	NA	NA	NA	12167	Bmpr1b	bone morphogenetic protein receptor, type 1B
1974	NA	NA	240	0.00274326	NA	NA	NA	NA	13057	Cyba	cytochrome b-245, alpha polypeptide
4455	NA	NA	243.667	0.00283265	NA	NA	NA	NA	18994	Pou3f4	POU domain, class 3, transcription factor 4
7294	NA	NA	244.667	0.00285317	NA	NA	NA	NA	230752	Fam176b	family with sequence similarity 176, member B
5241	NA	NA	248	0.00292204	NA	NA	NA	NA	20682	Sox9	SRY-box containing gene 9
4708	NA	NA	250.667	0.00299531	NA	NA	NA	NA	19309	Pygm	muscle glycogen phosphorylase
6543	NA	NA	250.667	0.00299531	2247	NA	NA	NA	22320	Vamp8	vesicle-associated membrane protein 8
14628	2743	NA	253.667	0.00307298	NA	NA	NA	NA	74002	Psd2	pleckstrin and Sec7 domain containing 2
10379	NA	NA	254	0.00308617	NA	NA	NA	NA	54326	Elovl2	elongation of very long chain fatty acids (FEN1/Elo2, SUR4/Elo3, yeast)-like 2
15303	2054	NA	254	0.00308617	NA	NA	NA	NA	76257	Slc38a3	solute carrier family 38, member 3
6420	2091.67	NA	254.333	0.00309203	NA	NA	NA	NA	22051	Trip6	thyroid hormone receptor interactor 6
303	NA	NA	255.333	0.00311547	NA	NA	NA	NA	103140	Gstt3	glutathione S-transferase, theta 3
10718	NA	NA	256	0.0031228	NA	NA	NA	NA	56419	Diap3	diaphanous homolog 3 (Drosophila)
8648	NA	NA	256.667	0.00313892	NA	NA	NA	NA	268709	Fam107a	family with sequence similarity 107, member A
6036	NA	NA	260.333	0.00322831	NA	NA	NA	NA	216829	Mmgt2	membrane magnesium transporter 2
5249	NA	NA	262.333	0.00328986	NA	NA	NA	NA	20692	Sparc	secreted acidic cysteine rich glycoprotein
6665	NA	NA	264.667	0.00333529	NA	NA	NA	NA	224079	Atp13a4	ATPase type 13A4
8602	NA	NA	269.333	0.00345399	NA	NA	NA	NA	26570	Slc7a11	solute carrier family 7 (cationic amino acid transporter, y+ system), member 11
10692	2293	NA	270.667	0.00350674	NA	NA	NA	NA	56376	Pdlim5	PDZ and LIM domain 5
6639	2192.67	NA	271.333	0.00351993	NA	NA	NA	NA	223843	Dbx2	developing brain homeobox 2
10261	NA	NA	271.667	0.00353019	NA	NA	NA	NA	53412	Ppp1r3c	protein phosphatase 1, regulatory (inhibitor) subunit 3C
2688	NA	NA	276.667	0.00366647	NA	NA	NA	NA	14633	Gli2	GLI-Kruppel family member GLI2
4773	2125.33	NA	280.333	0.00378517	NA	NA	NA	NA	194126	Mtmr11	myotubularin related protein 11
538	2224.33	NA	281	0.00379689	NA	NA	NA	NA	106869	Tnfaip8	tumor necrosis factor, alpha-induced protein 8
1587	NA	NA	281	0.00379689	NA	NA	NA	NA	12406	Serpinh1	serine (or cysteine) peptidase inhibitor, clade H, member 1
9169	2232	NA	281.667	0.00380862	NA	NA	NA	NA	30937	Lmcd1	LIM and cysteine-rich domains 1
13881	NA	NA	282.333	0.00381887	NA	NA	NA	NA	71584	Gdpd2	glycerophosphodiester phosphodiesterase domain containing 2
8877	NA	NA	283.333	0.00384818	NA	NA	NA	NA	271424	Ip6k3	inositol hexaphosphate kinase 3
6840	NA	NA	287.333	0.00398447	NA	NA	NA	NA	225998	Rorb	RAR-related orphan receptor beta
16269	NA	NA	291.333	0.00412515	NA	NA	NA	NA	98660	Atp1a2	ATPase, Na+/K+ transporting, alpha 2 polypeptide
12673	NA	NA	291.667	0.00413394	NA	NA	NA	NA	68010	Bambi	BMP and activin membrane-bound inhibitor, homolog (Xenopus laevis)
10926	3625.67	NA	292.667	0.00415592	NA	NA	NA	NA	57266	Cxcl14	chemokine (C-X-C motif) ligand 14
15022	NA	NA	293.333	0.00417644	NA	NA	NA	NA	75216	4930534B04Rik	RIKEN cDNA 4930534B04 gene
4087	NA	NA	293.667	0.00419109	NA	NA	NA	NA	18132	Notch4	Notch gene homolog 4 (Drosophila)
13896	NA	NA	294.333	0.00420721	NA	NA	NA	NA	71660	Rarres2	retinoic acid receptor responder (tazarotene induced) 2
5216	2327.67	NA	295	0.00422919	NA	NA	NA	NA	20652	Soat1	sterol O-acyltransferase 1
3887	NA	NA	298.333	0.00434056	NA	NA	NA	NA	17750	Mt2	metallothionein 2
15864	NA	NA	298.333	0.00434056	NA	NA	NA	NA	80290	Gpr146	G protein-coupled receptor 146
14238	NA	NA	299.667	0.00436694	NA	NA	NA	NA	72351	Ptar1	protein prenyltransferase alpha subunit repeat containing 1
6594	2208	NA	301	0.0044197	NA	NA	NA	NA	223646	Naprt1	nicotinate phosphoribosyltransferase domain containing 1
9242	NA	NA	305.333	0.00458968	NA	NA	NA	NA	319625	Galm	galactose mutarotase
6246	NA	NA	307	0.0046483	3928.33	NA	2984.33	NA	21835	Thrsp	thyroid hormone responsive SPOT14 homolog (Rattus)
11073	2320.33	NA	307.333	0.00466149	NA	NA	NA	NA	58237	Nkain4	Na+/K+ transporting ATPase interacting 4
3802	NA	NA	308.333	0.004682	NA	NA	NA	NA	17306	Sypl2	synaptophysin-like 2
11101	NA	NA	310.333	0.00474209	NA	NA	NA	NA	58859	Efemp2	epidermal growth factor-containing fibulin-like extracellular matrix protein 2
2637	NA	NA	316	0.00494725	NA	NA	NA	NA	14560	Gdf10	growth differentiation factor 10
3127	NA	NA	317	0.00496776	NA	NA	NA	NA	16008	Igfbp2	insulin-like growth factor binding protein 2
1639	NA	NA	317.333	0.00497216	NA	NA	NA	NA	12494	Cd38	CD38 antigen
8508	NA	NA	319.333	0.00502198	NA	NA	NA	NA	26364	Cd97	CD97 antigen
2577	2333	NA	327.333	0.0053136	NA	NA	NA	NA	14405	Gabrg1	gamma-aminobutyric acid (GABA-A) receptor, subunit gamma 1
4065	NA	NA	327.333	0.0053136	NA	NA	NA	NA	18104	Nqo1	NAD(P)H dehydrogenase, quinone 1
1488	NA	NA	330.333	0.00544402	NA	NA	NA	NA	12263	C2	complement component 2 (within H-2S)
2740	1944.67	NA	331	0.00546893	NA	NA	NA	NA	14726	Pdpn	podoplanin
11238	2296.67	NA	332.667	0.00552902	NA	NA	NA	NA	622434	4631416L12Rik	RIKEN cDNA 4631416L12 gene
9197	NA	NA	333.333	0.00556272	NA	NA	NA	NA	319158	Hist1h4i	histone cluster 1, H4i
12149	NA	NA	333.333	0.00556272	2166	NA	NA	NA	67111	Naaa	N-acylethanolamine acid amidase
10439	NA	NA	335	0.00561694	NA	NA	NA	NA	545140	Olfr288	olfactory receptor 288
2467	NA	NA	335.667	0.00565211	NA	NA	NA	NA	14221	Fjx1	four jointed box 1 (Drosophila)
369	2924.67	NA	338.333	0.0057796	3819.33	NA	NA	NA	104174	Gldc	glycine decarboxylase
3033	NA	NA	338.667	0.00579426	NA	NA	2162.67	NA	15483	Hsd11b1	hydroxysteroid 11-beta dehydrogenase 1
7740	NA	NA	339	0.00581477	NA	NA	NA	NA	235587	Parp3	poly (ADP-ribose) polymerase family, member 3
8177	NA	NA	340	0.00586166	NA	NA	NA	NA	241624	Exdl1	exonuclease 3'-5' domain-like 1
877	2049.33	NA	342.667	0.00597597	NA	NA	NA	NA	110595	Timp4	tissue inhibitor of metalloproteinase 4
8919	NA	NA	342.667	0.00597597	2175.33	NA	NA	NA	27273	Pdk4	pyruvate dehydrogenase kinase, isoenzyme 4
1705	NA	NA	343.333	0.00599209	NA	NA	NA	NA	12587	Mia1	melanoma inhibitory activity 1
4949	NA	NA	347	0.00614156	NA	NA	NA	NA	20204	Prrx2	paired related homeobox 2
9149	NA	NA	348	0.00618259	NA	NA	NA	NA	30805	Slc22a4	solute carrier family 22 (organic cation transporter), member 4
7055	NA	NA	354.667	0.00643904	NA	NA	NA	NA	22773	Zic3	zinc finger protein of the cerebellum 3
2668	NA	NA	355.333	0.00646688	NA	NA	NA	NA	14609	Gja1	gap junction protein, alpha 1
4463	NA	NA	355.667	0.00648886	NA	NA	NA	NA	19013	Ppara	peroxisome proliferator activated receptor alpha
3271	NA	NA	358.333	0.00664859	NA	NA	NA	NA	16475	Jub	ajuba
12613	NA	NA	358.333	0.00664859	NA	NA	NA	NA	67896	Ccdc80	coiled-coil domain containing 80
8651	NA	NA	359	0.00666911	NA	NA	NA	NA	26874	Abcd2	ATP-binding cassette, sub-family D (ALD), member 2
3951	2108.33	NA	359.333	0.0066779	NA	NA	NA	NA	17909	Myo10	myosin X
10353	NA	NA	361	0.00675264	NA	NA	NA	NA	54156	Egfl6	EGF-like-domain, multiple 6
3647	NA	NA	361.667	0.00677315	NA	NA	NA	NA	171095	Il17rc	interleukin 17 receptor C
7541	2083.67	NA	364.667	0.00689625	NA	NA	NA	NA	233271	Luzp2	leucine zipper protein 2
4284	NA	NA	365.667	0.00694168	NA	NA	NA	NA	18596	Pdgfrb	platelet derived growth factor receptor, beta polypeptide
10945	3072	NA	366.333	0.00697685	5809	NA	NA	NA	57319	Smpdl3a	sphingomyelin phosphodiesterase, acid-like 3A
14614	NA	NA	369.667	0.00713804	NA	NA	NA	NA	73910	Arhgap18	Rho GTPase activating protein 18
3427	NA	NA	372	0.00724062	NA	NA	NA	NA	16779	Lamb2	laminin, beta 2
13371	NA	NA	372.667	0.0072626	NA	NA	NA	NA	69772	Bdh2	3-hydroxybutyrate dehydrogenase, type 2
74	NA	NA	373	0.00727286	NA	NA	NA	NA	100041799	100041799	predicted gene, 100041799
12	NA	NA	374.333	0.00731829	NA	NA	NA	NA	100038959	100038959	predicted gene, 100038959
1902	NA	NA	376.333	0.00738863	NA	NA	NA	NA	12950	Hapln1	hyaluronan and proteoglycan link protein 1
7154	2467.67	NA	376.667	0.00740035	NA	NA	NA	NA	228966	Ppp1r3d	protein phosphatase 1, regulatory subunit 3D
10989	NA	NA	377.667	0.00743992	NA	NA	NA	NA	57742	Abhd1	abhydrolase domain containing 1
4867	NA	NA	378.333	0.0074663	NA	NA	NA	NA	19752	Rnase1	ribonuclease, RNase A family, 1 (pancreatic)
5878	NA	NA	379	0.00747948	2310.67	NA	NA	NA	214855	Arid5a	AT rich interactive domain 5A (MRF1-like)
12582	2358.33	NA	379	0.00747948	NA	NA	NA	NA	67861	2310005E10Rik	RIKEN cDNA 2310005E10 gene
13972	NA	NA	381.333	0.00756301	NA	NA	NA	NA	71801	Plekhf2	pleckstrin homology domain containing, family F (with FYVE domain) member 2
14788	NA	NA	384.667	0.00769343	NA	NA	NA	NA	74318	Hopx	HOP homeobox
2473	NA	NA	385.667	0.00773007	NA	NA	NA	NA	14230	Fkbp10	FK506 binding protein 10
3536	NA	NA	389.667	0.00791032	NA	NA	NA	NA	170442	Bbox1	butyrobetaine (gamma), 2-oxoglutarate dioxygenase 1 (gamma-butyrobetaine hydroxylase)
6555	NA	NA	389.667	0.00791032	NA	NA	NA	NA	22329	Vcam1	vascular cell adhesion molecule 1
8485	3617	NA	389.667	0.00791032	3208	NA	NA	NA	259172	Mfrp	membrane-type frizzled-related protein
12214	NA	NA	390.333	0.00794256	NA	NA	NA	NA	67217	2810055F11Rik	RIKEN cDNA 2810055F11 gene
14749	NA	NA	391.333	0.00799091	2703	NA	NA	NA	74229	Paqr8	progestin and adipoQ receptor family member VIII
1954	2182	NA	394	0.00810668	NA	NA	NA	NA	13019	Ctf1	cardiotrophin 1
9521	NA	NA	395	0.00815504	2467.67	NA	NA	NA	329828	AI464131	expressed sequence AI464131
15961	NA	NA	396	0.00819461	NA	NA	NA	NA	81879	Tcfcp2l1	transcription factor CP2-like 1
9497	2077.67	NA	397	0.00824443	NA	NA	NA	NA	329274	Fam163a	family with sequence similarity 163, member A
6841	NA	NA	397.333	0.00826788	NA	NA	NA	NA	22601	Yap1	yes-associated protein 1
3535	NA	NA	399	0.00834408	NA	NA	NA	NA	170441	Slc2a10	solute carrier family 2 (facilitated glucose transporter), member 10
1482	NA	NA	399.333	0.0083602	NA	NA	NA	NA	12257	Tspo	translocator protein
4703	3877.33	NA	402	0.00845545	2420.67	NA	NA	NA	19301	Pxmp2	peroxisomal membrane protein 2
6941	NA	NA	404.333	0.00856096	NA	NA	NA	NA	226781	Slc30a10	solute carrier family 30, member 10
8280	NA	NA	406.667	0.00865914	NA	NA	NA	NA	243616	Slc6a11	solute carrier family 6 (neurotransmitter transporter, GABA), member 11
6318	2048.67	NA	407	0.00867087	NA	NA	NA	NA	21907	Nr2e1	nuclear receptor subfamily 2, group E, member 1
7590	NA	NA	410.667	0.00884818	NA	NA	NA	NA	233899	Gm166	gene model 166, (NCBI)
9205	NA	NA	411	0.00885844	NA	NA	NA	NA	319251	9630001P10Rik	RIKEN cDNA 9630001P10 gene
10828	2315.33	NA	413	0.00895955	4409.67	NA	NA	NA	56699	Cdc42ep4	CDC42 effector protein (Rho GTPase binding) 4
6234	NA	NA	415.667	0.00906506	NA	NA	NA	NA	21828	Thbs4	thrombospondin 4
14809	2278.67	NA	416	0.00908118	NA	NA	NA	NA	74365	Lonrf3	LON peptidase N-terminal domain and ring finger 3
10434	NA	NA	416.667	0.00910756	NA	NA	NA	NA	544888	EG544888	predicted gene, EG544888
15191	NA	NA	417	0.00912222	NA	NA	NA	NA	75736	Bcl2l12	BCL2-like 12 (proline rich)
7553	NA	NA	418.667	0.00920281	NA	NA	NA	NA	233529	Kctd14	potassium channel tetramerisation domain containing 14
1698	NA	NA	419.333	0.00924385	NA	NA	NA	NA	12576	Cdkn1b	cyclin-dependent kinase inhibitor 1B
3126	2325.33	NA	419.333	0.00924385	NA	NA	NA	NA	16007	Cyr61	cysteine rich protein 61
14664	NA	NA	419.667	0.00925557	NA	NA	NA	NA	74091	Npl	N-acetylneuraminate pyruvate lyase
2499	NA	NA	421.333	0.00933324	NA	NA	NA	NA	14264	Fmod	fibromodulin
2817	NA	NA	421.667	0.00934789	NA	NA	NA	NA	14864	Gstm3	glutathione S-transferase, mu 3
3696	2115	NA	424	0.00943581	NA	NA	NA	NA	171469	Gpr37l1	G protein-coupled receptor 37-like 1
6273	2176.33	NA	424	0.00943581	NA	NA	NA	NA	21859	Timp3	tissue inhibitor of metalloproteinase 3
1874	2686	NA	424.333	0.009449	4112	NA	NA	NA	12894	Cpt1a	carnitine palmitoyltransferase 1a, liver
2547	NA	NA	426	0.00953546	NA	NA	NA	NA	14362	Fzd1	frizzled homolog 1 (Drosophila)
1711	NA	NA	426.333	0.00955451	NA	NA	NA	NA	12606	Cebpa	CCAAT/enhancer binding protein (C/EBP), alpha
14053	NA	NA	428.333	0.00965123	NA	NA	NA	NA	71943	Tom1l1	target of myb1-like 1 (chicken)
7642	2343.33	NA	429	0.00968054	NA	NA	NA	NA	234577	Cpne2	copine II
2301	NA	NA	433.667	0.00994431	NA	NA	NA	NA	13998	Fgd6	FYVE, RhoGEF and PH domain containing 6
3995	2609.67	NA	434	0.00997362	4079	NA	NA	NA	17986	Ndp	Norrie disease (pseudoglioma) (human)
1892	NA	NA	435	0.0100249	NA	NA	NA	NA	12925	Crip1	cysteine-rich protein 1 (intestinal)
13639	NA	NA	438.667	0.0101802	NA	NA	NA	NA	70676	Gulp1	GULP, engulfment adaptor PTB domain containing 1
8474	NA	NA	439	0.0101876	NA	NA	NA	NA	252967	Ropn1l	ropporin 1-like
2929	NA	NA	439.333	0.0102022	NA	NA	NA	NA	15216	Hfe	hemochromatosis
4145	2260	NA	439.667	0.010214	NA	NA	NA	NA	18230	Nxn	nucleoredoxin
16249	2466	NA	440.333	0.0102623	4221.67	NA	NA	NA	98267	Stk17b	serine/threonine kinase 17b (apoptosis-inducing)
2661	NA	NA	440.667	0.0102784	NA	NA	NA	NA	14600	Ghr	growth hormone receptor
2448	NA	NA	441	0.0102916	NA	NA	NA	NA	14182	Fgfr1	fibroblast growth factor receptor 1
9823	NA	NA	442	0.0103341	NA	NA	NA	NA	384009	Glipr2	GLI pathogenesis-related 2
4624	2282.33	NA	443.667	0.0104089	NA	NA	NA	NA	192236	Hps1	Hermansky-Pudlak syndrome 1 homolog (human)
13469	2625.33	NA	443.667	0.0104089	4070	NA	NA	NA	70083	Metrn	meteorin, glial cell differentiation regulator
3300	1982	NA	445.667	0.0105085	NA	NA	NA	NA	16517	Kcnj16	potassium inwardly-rectifying channel, subfamily J, member 16
12100	NA	NA	448	0.010614	NA	NA	NA	NA	670358	670358	predicted gene, 670358
1375	NA	NA	448.333	0.0106331	NA	NA	NA	NA	11988	Slc7a2	solute carrier family 7 (cationic amino acid transporter, y+ system), member 2
2358	2177	NA	448.667	0.0106462	NA	NA	NA	NA	14066	F3	coagulation factor III
1119	NA	NA	449.333	0.0106873	NA	NA	NA	NA	11610	Agtrap	angiotensin II, type I receptor-associated protein
12922	NA	NA	450.667	0.0107459	NA	NA	NA	NA	68607	Serhl	serine hydrolase-like
12917	NA	NA	452	0.0108133	NA	NA	NA	NA	68591	Mocos	molybdenum cofactor sulfurase
474	NA	NA	453	0.010869	NA	NA	NA	NA	105827	Amigo2	adhesion molecule with Ig like domain 2
2182	2029	NA	454.667	0.0109686	NA	NA	NA	NA	13618	Ednrb	endothelin receptor type B
3596	NA	NA	455	0.0109818	NA	NA	NA	NA	170756	Slc24a6	solute carrier family 24 (sodium/potassium/calcium exchanger), member 6
12598	3557.67	NA	456	0.0110273	2869	NA	NA	NA	67880	Dcxr	dicarbonyl L-xylulose reductase
2268	NA	NA	456.333	0.0110375	NA	NA	NA	NA	13850	Ephx2	epoxide hydrolase 2, cytoplasmic
11896	NA	NA	456.667	0.0110492	NA	NA	NA	NA	66733	Kcng4	potassium voltage-gated channel, subfamily G, member 4
12625	2777	NA	458.333	0.0111401	4187.67	NA	NA	NA	67916	Ppap2b	phosphatidic acid phosphatase type 2B
5886	NA	NA	461.667	0.0113409	NA	NA	NA	NA	214932	Cecr5	cat eye syndrome chromosome region, candidate 5 homolog (human)
8232	NA	NA	461.667	0.0113409	NA	NA	NA	NA	242702	Myom3	myomesin family, member 3
1015	NA	NA	465.333	0.0115695	NA	NA	NA	NA	114644	Slc13a3	solute carrier family 13 (sodium-dependent dicarboxylate transporter), member 3
6552	NA	NA	469.333	0.0117717	NA	NA	NA	NA	223267	a2ld1	AIG2-like domain 1
4322	NA	NA	471	0.0118552	NA	NA	NA	NA	18654	Pgf	placental growth factor
4403	NA	NA	471	0.0118552	NA	NA	NA	NA	18799	Plcd1	phospholipase C, delta 1
11798	2266	NA	471.333	0.0118757	NA	NA	NA	NA	666060	Frmpd1	FERM and PDZ domain containing 1
1085	1882.33	NA	471.667	0.0118875	NA	NA	NA	NA	11541	Adora2b	adenosine A2b receptor
9108	NA	NA	471.667	0.0118875	NA	NA	NA	NA	29820	Tnfrsf19	tumor necrosis factor receptor superfamily, member 19
4922	NA	NA	472	0.0119006	NA	NA	2290	NA	20148	Dhrs3	dehydrogenase/reductase (SDR family) member 3
12301	2068.67	NA	472.667	0.0119519	NA	NA	NA	NA	67374	Jam2	junction adhesion molecule 2
8842	NA	NA	474.667	0.0120472	NA	NA	NA	NA	270198	Pfkfb4	6-phosphofructo-2-kinase/fructose-2,6-biphosphatase 4
8845	NA	NA	475	0.0120633	NA	NA	NA	NA	27028	Ermap	erythroblast membrane-associated protein
97	2051.67	NA	475.333	0.012075	NA	NA	NA	NA	100042616	100042616	predicted gene, 100042616
206	NA	NA	475.667	0.0120941	NA	NA	NA	NA	101351	A130022J15Rik	RIKEN cDNA A130022J15 gene
7229	NA	NA	480.333	0.0123315	NA	NA	NA	NA	229900	Gbp6	guanylate binding protein 6
4066	NA	NA	481	0.0123813	NA	NA	NA	NA	18105	Nqo2	NAD(P)H dehydrogenase, quinone 2
10410	NA	NA	481	0.0123813	NA	NA	NA	NA	54403	Slc4a4	solute carrier family 4 (anion exchanger), member 4
3230	NA	NA	481.333	0.0124194	NA	NA	NA	NA	16404	Itga7	integrin alpha 7
8157	NA	NA	482.667	0.0125029	2416.33	NA	NA	NA	241274	Pnpla7	patatin-like phospholipase domain containing 7
8749	NA	NA	484.667	0.0125982	NA	NA	NA	NA	26942	Spag1	sperm associated antigen 1
8519	NA	NA	485	0.0126158	NA	NA	NA	NA	26377	Dapp1	dual adaptor for phosphotyrosine and 3-phosphoinositides 1
15194	NA	NA	486.333	0.0127198	NA	NA	2821.67	NA	75747	Sesn3	sestrin 3
14378	NA	NA	487	0.0127521	NA	NA	NA	NA	72823	Pard3b	par-3 partitioning defective 3 homolog B (C. elegans)
15116	NA	NA	487	0.0127521	NA	NA	NA	NA	75541	1700019G17Rik	RIKEN cDNA 1700019G17 gene
9383	NA	NA	487.667	0.0128077	NA	NA	NA	NA	320685	Dctd	dCMP deaminase
6674	NA	NA	491.333	0.0130158	NA	NA	NA	NA	224109	Lrrc33	leucine rich repeat containing 33
3461	NA	NA	495	0.0132151	NA	NA	2353.67	NA	16852	Lgals1	lectin, galactose binding, soluble 1
14468	NA	NA	495.333	0.0132371	NA	NA	NA	NA	73254	Ccdc18	coiled-coil domain containing 18
10159	3183	NA	496.667	0.0133265	NA	NA	NA	NA	52466	Slc46a1	solute carrier family 46, member 1
3089	NA	NA	501	0.0135668	NA	NA	NA	NA	15904	Id4	inhibitor of DNA binding 4
3808	NA	NA	505.667	0.0138335	NA	NA	NA	NA	17314	Mgmt	O-6-methylguanine-DNA methyltransferase
6016	NA	NA	508.333	0.0139947	NA	NA	NA	NA	216739	Acsl6	acyl-CoA synthetase long-chain family member 6
6580	2118.33	NA	512	0.0142013	NA	NA	NA	NA	22352	Vim	vimentin
281	2586.67	NA	513.333	0.0142863	NA	NA	NA	NA	102595	Plekho2	pleckstrin homology domain containing, family O member 2
3886	NA	NA	515	0.0144036	NA	NA	NA	NA	17748	Mt1	metallothionein 1
8222	1792	NA	515.667	0.0144519	NA	NA	NA	NA	242620	Dmrta2	doublesex and mab-3 related transcription factor like family A2
1946	NA	NA	516	0.0144754	NA	NA	NA	NA	13010	Cst3	cystatin C
14649	NA	NA	516.667	0.014512	NA	NA	NA	NA	74048	4632428N05Rik	RIKEN cDNA 4632428N05 gene
5500	2221	NA	517.333	0.0145545	NA	NA	NA	NA	209378	Itih5	inter-alpha (globulin) inhibitor H5
2402	NA	NA	517.667	0.0145809	NA	NA	NA	NA	14114	Fbln1	fibulin 1
12789	NA	NA	518.667	0.0146571	NA	NA	2753	NA	68241	9530058B02Rik	RIKEN cDNA 9530058B02 gene
1862	NA	NA	519	0.0146732	NA	NA	2173.67	NA	12868	Cox8a	cytochrome c oxidase, subunit VIIIa
1276	NA	NA	519.333	0.0146893	2357.67	NA	NA	NA	11816	Apoe	apolipoprotein E
1349	2597.33	NA	522.333	0.0148828	5582.33	NA	NA	NA	11932	Atp1b2	ATPase, Na+/K+ transporting, beta 2 polypeptide
6024	NA	NA	525.333	0.0150601	NA	NA	NA	NA	21678	Tead3	TEA domain family member 3
3462	NA	NA	527	0.0151524	NA	NA	NA	NA	16854	Lgals3	lectin, galactose binding, soluble 3
3881	NA	NA	527.333	0.0151832	NA	NA	NA	NA	17701	Msx1	homeobox, msh-like 1
184	NA	NA	529	0.0153195	NA	NA	NA	NA	100900	Hscb	HscB iron-sulfur cluster co-chaperone homolog (E. coli)
14942	2212	NA	530.333	0.0154206	NA	NA	NA	NA	74761	Mxra8	matrix-remodelling associated 8
15557	NA	NA	531.333	0.0155085	NA	NA	NA	NA	77252	9430038I01Rik	RIKEN cDNA 9430038I01 gene
4406	3703.67	NA	533	0.0156038	2901.33	NA	NA	NA	18806	Pld2	phospholipase D2
4948	2315.33	NA	533.667	0.0156287	NA	NA	NA	NA	20203	S100b	S100 protein, beta polypeptide, neural
1019	NA	NA	534.333	0.0156726	NA	NA	NA	NA	114663	Impa2	inositol (myo)-1(or 4)-monophosphatase 2
8210	NA	NA	534.333	0.0156726	NA	NA	NA	NA	242484	D630039A03Rik	RIKEN cDNA D630039A03 gene
6562	NA	NA	537.667	0.0159056	NA	NA	NA	NA	22339	Vegfa	vascular endothelial growth factor A
2331	NA	NA	538	0.0159393	NA	NA	NA	NA	140492	Kcnn2	potassium intermediate/small conductance calcium-activated channel, subfamily N, member 2
13791	NA	NA	538.667	0.015973	NA	NA	NA	NA	71180	4933416E14Rik	RIKEN cDNA 4933416E14 gene
734	NA	NA	540	0.0160595	NA	NA	NA	NA	108960	Irak2	interleukin-1 receptor-associated kinase 2
13969	3332	NA	540	0.0160595	NA	NA	3515.33	NA	71795	Pitpnc1	phosphatidylinositol transfer protein, cytoplasmic 1
961	NA	NA	541	0.0161313	NA	NA	NA	NA	11409	Acads	acyl-Coenzyme A dehydrogenase, short chain
12341	NA	NA	541	0.0161313	2129.33	NA	NA	NA	67442	Retsat	retinol saturase (all trans retinol 13,14 reductase)
5239	NA	NA	542	0.0162046	NA	NA	NA	NA	20680	Sox7	SRY-box containing gene 7
6388	NA	NA	543.667	0.0163189	NA	NA	NA	NA	21983	Tpbg	trophoblast glycoprotein
1562	NA	NA	545	0.0163746	NA	NA	NA	NA	12368	Casp6	caspase 6
1137	NA	NA	545.333	0.0164009	NA	NA	NA	NA	11647	Alpl	alkaline phosphatase, liver/bone/kidney
9603	NA	NA	545.667	0.0164215	NA	NA	NA	NA	333182	Cox6b2	cytochrome c oxidase subunit VIb polypeptide 2
7051	NA	NA	546	0.0164405	NA	NA	NA	NA	22772	Zic2	zinc finger protein of the cerebellum 2
5318	NA	NA	546.667	0.0164771	2111.33	NA	NA	NA	207683	Igsf11	immunoglobulin superfamily, member 11
13219	NA	NA	549.333	0.0166427	NA	NA	NA	NA	69379	C8g	complement component 8, gamma polypeptide
15799	3904.67	NA	549.333	0.0166427	2464.33	NA	NA	NA	78829	Tsc22d4	TSC22 domain family, member 4
7745	3431	NA	549.667	0.0166589	3372.33	NA	NA	NA	235611	Plxnb1	plexin B1
2601	1880	NA	550	0.0166764	NA	NA	NA	NA	14451	Gas1	growth arrest specific 1
2822	NA	NA	554.333	0.0169241	NA	NA	NA	NA	14872	Gstt2	glutathione S-transferase, theta 2
6414	2216.33	NA	557	0.017078	NA	NA	NA	NA	22038	Plscr1	phospholipid scramblase 1
288	NA	NA	557.667	0.0171395	NA	NA	NA	NA	102680	Slc6a20a	solute carrier family 6 (neurotransmitter transporter), member 20A
14998	2456.33	NA	558.667	0.0172011	NA	NA	NA	NA	75104	Mmd2	monocyte to macrophage differentiation-associated 2
10918	2231	NA	561.667	0.0174355	NA	NA	NA	NA	57257	Vav3	vav 3 oncogene
6173	2166	NA	563	0.017544	NA	NA	NA	NA	21778	Tex9	testis expressed gene 9
11007	3740.67	NA	564	0.0175967	4136.33	NA	NA	NA	57776	Ttyh1	tweety homolog 1 (Drosophila)
4199	NA	NA	565.333	0.0176876	NA	NA	NA	NA	18423	Otx1	orthodenticle homolog 1 (Drosophila)
3077	NA	NA	565.667	0.0177125	NA	NA	NA	NA	15586	Hyal1	hyaluronoglucosaminidase 1
14174	NA	NA	566.333	0.0177564	NA	NA	NA	NA	72169	Trim29	tripartite motif-containing 29
384	NA	NA	570	0.0180129	NA	NA	NA	NA	104362	Meig1	meiosis expressed gene 1
11758	NA	NA	572.667	0.0181975	NA	NA	NA	NA	66548	Adamtsl5	ADAMTS-like 5
14727	NA	NA	572.667	0.0181975	NA	NA	NA	NA	74190	1200009I06Rik	RIKEN cDNA 1200009I06 gene
1879	NA	NA	573.667	0.0182635	NA	NA	NA	NA	12904	Crabp2	cellular retinoic acid binding protein II
7430	NA	NA	575.667	0.0184056	NA	NA	NA	NA	232086	Tmem150	transmembrane protein 150
609	NA	NA	576	0.0184174	3830.67	NA	NA	NA	107747	Aldh1l1	aldehyde dehydrogenase 1 family, member L1
7043	NA	NA	576	0.0184174	NA	NA	NA	NA	227696	Phyhd1	phytanoyl-CoA dioxygenase domain containing 1
7924	NA	NA	576	0.0184174	NA	NA	NA	NA	23888	Gpc6	glypican 6
6499	NA	NA	578.667	0.0186196	NA	NA	NA	NA	22229	Ucp3	uncoupling protein 3 (mitochondrial, proton carrier)
2928	2021.67	NA	579.667	0.0186811	NA	NA	NA	NA	15214	Hey2	hairy/enhancer-of-split related with YRPW motif 2
11295	3031	NA	580.333	0.0187236	NA	NA	NA	NA	63955	Cables1	CDK5 and Abl enzyme substrate 1
1227	4513.33	NA	580.667	0.0187559	2909	NA	NA	NA	11758	Prdx6	peroxiredoxin 6
1860	NA	NA	581.333	0.0188203	NA	NA	2265.33	NA	12865	Cox7a1	cytochrome c oxidase, subunit VIIa 1
10516	2167	NA	581.667	0.0188496	NA	NA	NA	NA	55932	Gbp3	guanylate binding protein 3
4084	NA	NA	582.333	0.0188951	NA	NA	NA	NA	18129	Notch2	Notch gene homolog 2 (Drosophila)
1259	NA	NA	582.667	0.0189156	NA	NA	NA	NA	11796	Birc3	baculoviral IAP repeat-containing 3
3192	NA	NA	583.667	0.0189786	2804	NA	NA	NA	16206	Lrig1	leucine-rich repeats and immunoglobulin-like domains 1
11074	2277.33	NA	583.667	0.0189786	NA	NA	NA	NA	58238	Fam181b	family with sequence similarity 181, member B
15090	3009	NA	585	0.019068	4277.67	NA	NA	NA	75475	Oplah	5-oxoprolinase (ATP-hydrolysing)
8248	3604	NA	585.333	0.0190973	2919.67	NA	NA	NA	242915	Fam59b	family with sequence similarity 59, member B
5822	NA	NA	585.667	0.0191222	NA	NA	NA	NA	21416	Tcf7l2	transcription factor 7-like 2, T-cell specific, HMG-box
9882	NA	NA	586	0.0191398	NA	NA	NA	NA	407821	Znrf3	zinc and ring finger 3
8989	NA	NA	586.667	0.0191852	NA	NA	2758.67	NA	27660	1700088E04Rik	RIKEN cDNA 1700088E04 gene
5090	NA	NA	587.333	0.0192365	NA	NA	NA	NA	20443	St3gal4	ST3 beta-galactoside alpha-2,3-sialyltransferase 4
9057	NA	NA	587.333	0.0192365	NA	NA	NA	NA	280408	Rilp	Rab interacting lysosomal protein
2038	3931.67	NA	588	0.0192878	2592.33	NA	NA	NA	13177	Dci	dodecenoyl-Coenzyme A delta isomerase (3,2 trans-enoyl-Coenyme A isomerase)
15683	NA	NA	588	0.0192878	NA	NA	NA	NA	78174	Cox7b2	cytochrome c oxidase subunit VIIb2
713	3629.67	NA	590	0.0193977	NA	NA	3014.67	NA	108811	Ccdc122	coiled-coil domain containing 122
11954	NA	NA	593.333	0.0195999	NA	NA	NA	NA	66824	Pycard	PYD and CARD domain containing
8502	NA	NA	594	0.0196395	NA	NA	NA	NA	26358	Aldh1a7	aldehyde dehydrogenase family 1, subfamily A7
4839	NA	NA	595.333	0.0197479	NA	NA	NA	NA	19703	Renbp	renin binding protein
9752	NA	NA	595.333	0.0197479	NA	NA	NA	NA	381668	2410025L10Rik	RIKEN cDNA 2410025L10 gene
4023	NA	NA	596	0.0197831	2233.33	NA	NA	NA	18024	Nfe2l2	nuclear factor, erythroid derived 2, like 2
11149	NA	NA	596	0.0197831	3147.67	NA	NA	NA	59038	Pxmp4	peroxisomal membrane protein 4
10852	2589.33	NA	597.333	0.0198872	NA	NA	NA	NA	56741	Igdcc4	immunoglobulin superfamily, DCC subclass, member 4
4005	2691.67	NA	598.333	0.0199531	NA	NA	NA	NA	18003	Nedd9	neural precursor cell expressed, developmentally down-regulated gene 9
13871	NA	NA	599	0.0200044	NA	NA	NA	NA	71522	Ggt6	gamma-glutamyltransferase 6
1002	1996.33	NA	599.333	0.0200205	NA	NA	NA	NA	114584	Clic1	chloride intracellular channel 1
16282	NA	NA	600	0.0200659	NA	NA	NA	NA	98932	Myl9	myosin, light polypeptide 9, regulatory
818	2373	NA	600.333	0.0200879	NA	NA	NA	NA	109857	Cbr3	carbonyl reductase 3
4943	1822	NA	600.333	0.0200879	NA	NA	NA	NA	20198	S100a4	S100 calcium binding protein A4
4803	NA	NA	604.333	0.020359	2431.33	NA	NA	NA	195434	Utp14b	UTP14, U3 small nucleolar ribonucleoprotein, homolog B (yeast)
3863	NA	NA	605.333	0.0204235	NA	NA	2089.33	NA	17532	Mras	muscle and microspikes RAS
9849	NA	NA	605.333	0.0204235	NA	NA	NA	NA	394431	Ugt1a@	UDP glycosyltransferase 1 family, polypeptide A cluster
12605	1729	NA	606.667	0.0205144	NA	NA	NA	NA	67888	Tmem100	transmembrane protein 100
4249	NA	NA	608.667	0.0206389	NA	NA	NA	NA	18542	Pcolce	procollagen C-endopeptidase enhancer protein
14743	NA	NA	609.333	0.0206756	NA	NA	NA	NA	74211	1700017B05Rik	RIKEN cDNA 1700017B05 gene
8235	NA	NA	610.667	0.0207679	NA	NA	NA	NA	242721	Klhdc7a	kelch domain containing 7A
36	2281	NA	611.333	0.0208236	NA	NA	NA	NA	100040174	100040174	predicted gene, 100040174
4696	NA	NA	612.333	0.0209217	NA	NA	NA	NA	192970	Dhrs11	dehydrogenase/reductase (SDR family) member 11
3566	NA	NA	613.667	0.0210199	NA	NA	NA	NA	170716	Cyp4f13	cytochrome P450, family 4, subfamily f, polypeptide 13
4428	NA	NA	616	0.0211591	NA	NA	NA	NA	18933	Prrx1	paired related homeobox 1
4474	NA	NA	616	0.0211591	NA	NA	NA	NA	19038	Ppic	peptidylprolyl isomerase C
3533	NA	NA	617.333	0.0212456	NA	NA	2605.67	NA	17035	Lxn	latexin
7514	3874.33	NA	617.333	0.0212456	NA	NA	2766	NA	233016	Blvrb	biliverdin reductase B (flavin reductase (NADPH))
8288	NA	NA	617.667	0.0212705	NA	NA	NA	NA	243755	Slc13a4	solute carrier family 13 (sodium/sulfate symporters), member 4
13193	NA	NA	617.667	0.0212705	NA	NA	2508.33	NA	69310	Pacrg	Park2 co-regulated
3095	NA	NA	618.667	0.0213321	NA	NA	NA	NA	15932	Idua	iduronidase, alpha-L-
13832	NA	NA	619	0.0213555	NA	NA	NA	NA	71361	Aifm2	apoptosis-inducing factor, mitochondrion-associated 2
2755	2412	NA	620	0.0214229	4436.67	NA	NA	NA	14756	Gpld1	glycosylphosphatidylinositol specific phospholipase D1
4939	2188.33	NA	620	0.0214229	4316	NA	NA	NA	20193	S100a1	S100 calcium binding protein A1
9991	NA	NA	622	0.0215387	NA	NA	NA	NA	50493	Txnrd1	thioredoxin reductase 1
1402	1969.67	NA	622.667	0.021568	4422	NA	NA	NA	12032	Bcan	brevican
8946	NA	NA	625	0.0217614	2618	NA	NA	NA	27376	Slc25a10	solute carrier family 25 (mitochondrial carrier, dicarboxylate transporter), member 10
1147	2938.67	NA	626.333	0.0218538	5002	NA	NA	NA	11668	Aldh1a1	aldehyde dehydrogenase family 1, subfamily A1
4985	1746.33	NA	626.667	0.0218669	NA	NA	NA	NA	20284	Scrg1	scrapie responsive gene 1
14941	NA	NA	626.667	0.0218669	NA	NA	NA	NA	74760	Rab3il1	RAB3A interacting protein (rabin3)-like 1
14596	2113.33	NA	627	0.0218875	4257	NA	NA	NA	73827	1110012D08Rik	RIKEN cDNA 1110012D08 gene
6089	NA	NA	627.667	0.02193	NA	NA	NA	NA	217166	Nr1d1	nuclear receptor subfamily 1, group D, member 1
483	NA	NA	630	0.0221058	NA	NA	2222.67	NA	105859	Csdc2	cold shock domain containing C2, RNA binding
3324	1717.33	NA	630.667	0.0221571	NA	NA	NA	NA	16543	Mdfic	MyoD family inhibitor domain containing
3470	3199	NA	630.667	0.0221571	NA	NA	NA	NA	16870	Lhx2	LIM homeobox protein 2
12578	NA	NA	631	0.0221849	NA	NA	NA	NA	67856	Echdc3	enoyl Coenzyme A hydratase domain containing 3
2234	1850.33	NA	631.667	0.0222523	NA	NA	NA	NA	13797	Emx2	empty spiracles homolog 2 (Drosophila)
3684	NA	NA	632	0.0222729	NA	NA	NA	NA	17133	Maff	v-maf musculoaponeurotic fibrosarcoma oncogene family, protein F (avian)
6205	2099.67	NA	632	0.0222729	NA	NA	NA	NA	21808	Tgfb2	transforming growth factor, beta 2
1071	NA	NA	632.667	0.0223212	NA	NA	NA	NA	11517	Adcyap1r1	adenylate cyclase activating polypeptide 1 receptor 1
6589	NA	NA	633.333	0.0223798	NA	NA	NA	NA	22361	Vnn1	vanin 1
9482	NA	NA	633.667	0.0224106	NA	NA	NA	NA	328949	Mcc	mutated in colorectal cancers
2213	NA	NA	634.333	0.0224663	NA	NA	2333	NA	13685	Eif4ebp1	eukaryotic translation initiation factor 4E binding protein 1
4625	NA	NA	634.333	0.0224663	NA	NA	2077.67	NA	19224	Ptgs1	prostaglandin-endoperoxide synthase 1
3888	3711	NA	636.667	0.0226627	NA	NA	3256	NA	17751	Mt3	metallothionein 3
3701	NA	NA	637	0.0226876	NA	NA	NA	NA	171504	Apob48r	apolipoprotein B48 receptor
6357	1751.33	NA	637	0.0226876	NA	NA	NA	NA	21937	Tnfrsf1a	tumor necrosis factor receptor superfamily, member 1a
8026	5249.33	NA	637.333	0.0227052	3171.33	NA	4629.33	NA	23991	Cib1	calcium and integrin binding 1 (calmyrin)
12483	3714	NA	637.667	0.0227301	5228	NA	4515.33	NA	67695	2310016E02Rik	RIKEN cDNA 2310016E02 gene
9103	NA	NA	638	0.0227623	NA	NA	NA	NA	29815	Bcar3	breast cancer anti-estrogen resistance 3
5177	NA	NA	639.333	0.0228576	NA	NA	NA	NA	20583	Snai2	snail homolog 2 (Drosophila)
1911	NA	NA	639.667	0.0228883	NA	NA	NA	NA	12960	Crybb1	crystallin, beta B1
4786	NA	NA	639.667	0.0228883	NA	NA	NA	NA	19428	Rasl2-9	RAS-like, family 2, locus 9
11334	NA	NA	641.333	0.0230319	NA	NA	NA	NA	64292	Ptges	prostaglandin E synthase
839	NA	NA	642	0.0230818	NA	NA	NA	NA	110095	Pygl	liver glycogen phosphorylase
15704	3362.67	NA	642.667	0.0231287	NA	NA	3136.33	NA	78267	Klhdc8b	kelch domain containing 8B
13081	NA	NA	643.667	0.0231961	NA	NA	NA	NA	69034	4930579G22Rik	RIKEN cDNA 4930579G22 gene
4636	4003	NA	644	0.023221	3993.67	NA	NA	NA	19242	Ptn	pleiotrophin
10855	NA	NA	647.667	0.0234525	NA	NA	NA	NA	56744	Pf4	platelet factor 4
12982	2918.33	NA	651.667	0.0237163	NA	NA	4440.33	NA	68763	1110038B12Rik	RIKEN cDNA 1110038B12 gene
6498	NA	NA	652.333	0.0237559	NA	NA	NA	NA	22228	Ucp2	uncoupling protein 2 (mitochondrial, proton carrier)
15375	NA	NA	653.333	0.0238306	NA	NA	2221	NA	76505	1500009C09Rik	RIKEN cDNA 1500009C09 gene
6023	NA	NA	653.667	0.0238672	NA	NA	NA	NA	21677	Tead2	TEA domain family member 2
6912	NA	NA	654	0.0239009	2969.67	NA	NA	NA	226527	BC026585	cDNA sequence BC026585
7707	NA	NA	655.667	0.0240255	NA	NA	NA	NA	235302	D630033O11Rik	RIKEN cDNA D630033O11 gene
13209	NA	NA	656.333	0.0240709	NA	NA	2452.33	NA	69358	Lrtomt	leucine rich transmembrane and 0-methyltransferase domain containing
616	NA	NA	658	0.0242204	NA	NA	2031.33	NA	107771	Bmyc	brain expressed myelocytomatosis oncogene
14077	NA	NA	658.333	0.0242365	NA	NA	NA	NA	71983	Tmco6	transmembrane and coiled-coil domains 6
11424	1900	NA	660.667	0.0244607	NA	NA	NA	NA	65963	Tmem176b	transmembrane protein 176B
16248	NA	NA	661.333	0.0245179	NA	NA	NA	NA	98258	Txndc9	thioredoxin domain containing 9
12397	NA	NA	661.667	0.0245472	2882.33	NA	NA	NA	67528	Nudt7	nudix (nucleoside diphosphate linked moiety X)-type motif 7
10398	1913.33	NA	662.333	0.0245911	4356.33	NA	NA	NA	54381	Pgcp	plasma glutamate carboxypeptidase
1412	NA	NA	662.667	0.0246131	NA	NA	NA	NA	12043	Bcl2	B-cell leukemia/lymphoma 2
586	NA	NA	663.333	0.0246644	3620	NA	NA	NA	107515	Lgr4	leucine-rich repeat-containing G protein-coupled receptor 4
11359	3463.33	NA	663.333	0.0246644	NA	NA	3056	NA	64540	Tspan4	tetraspanin 4
11945	NA	NA	663.667	0.0246849	NA	NA	NA	NA	66817	Tmem170	transmembrane protein 170
5186	3132.33	NA	665.333	0.0248198	3863	NA	NA	NA	20598	Smpd2	sphingomyelin phosphodiesterase 2, neutral
6364	1987	NA	668.667	0.0250791	NA	NA	NA	NA	21944	Tnfsf12	tumor necrosis factor (ligand) superfamily, member 12
7956	1937.67	NA	669.667	0.0251656	NA	NA	NA	NA	239273	Abcc4	ATP-binding cassette, sub-family C (CFTR/MRP), member 4
10663	NA	NA	669.667	0.0251656	NA	NA	NA	NA	56325	Abcb9	ATP-binding cassette, sub-family B (MDR/TAP), member 9
13295	2040.33	NA	674.667	0.0255876	4635	NA	NA	NA	69590	Gpx8	glutathione peroxidase 8 (putative)
14286	NA	NA	678.333	0.0258954	NA	NA	NA	NA	72507	Dzip1l	DAZ interacting protein 1-like
14730	NA	NA	678.333	0.0258954	NA	NA	NA	NA	74194	Rnd3	Rho family GTPase 3
2816	NA	NA	680.667	0.0260698	2554.33	NA	NA	NA	14862	Gstm1	glutathione S-transferase, mu 1
5229	2090	NA	681	0.0260976	NA	NA	NA	NA	20668	Sox13	SRY-box containing gene 13
4434	3394.33	NA	685.333	0.02642	3732	NA	NA	NA	18950	Pnp1	purine-nucleoside phosphorylase 1
14948	NA	NA	687.333	0.0265753	2622	NA	4107	NA	74770	Hhatl	hedgehog acyltransferase-like
15959	NA	NA	688.333	0.0266471	NA	NA	NA	NA	81840	Sorcs2	sortilin-related VPS10 domain containing receptor 2
1150	2204	NA	689	0.0267101	4276.67	NA	NA	NA	116701	Fgfrl1	fibroblast growth factor receptor-like 1
1714	2484.33	NA	689	0.0267101	4322.67	NA	NA	NA	12609	Cebpd	CCAAT/enhancer binding protein (C/EBP), delta
16207	NA	NA	690	0.0268039	NA	NA	NA	NA	94282	Sfxn5	sideroflexin 5
12826	NA	NA	690.667	0.0268538	NA	NA	NA	NA	68328	Rab13	RAB13, member RAS oncogene family
5473	2083	NA	691.333	0.0269021	NA	NA	NA	NA	20917	Suclg2	succinate-Coenzyme A ligase, GDP-forming, beta subunit
14989	NA	NA	701.667	0.0277535	NA	NA	NA	NA	75051	4930578N16Rik	RIKEN cDNA 4930578N16 gene
809	NA	NA	702.667	0.027859	3921.33	NA	NA	NA	109731	Maob	monoamine oxidase B
6375	NA	NA	702.667	0.027859	NA	NA	NA	NA	21955	Tnnt1	troponin T1, skeletal, slow
15306	3839.67	NA	703.333	0.0279162	2640.33	NA	NA	NA	76263	Gstk1	glutathione S-transferase kappa 1
1157	NA	NA	710.333	0.028517	NA	NA	NA	NA	11676	Aldoc	aldolase C, fructose-bisphosphate
9804	2434.67	NA	713.333	0.0287559	NA	NA	NA	NA	382161	EG382161	predicted gene, EG382161
5126	2778	NA	716.333	0.0290211	3864	NA	NA	NA	20498	Slc12a4	solute carrier family 12, member 4
10288	NA	NA	717.333	0.0291032	2877.67	NA	NA	NA	53620	Vamp5	vesicle-associated membrane protein 5
5326	NA	NA	728.333	0.0300396	NA	NA	NA	NA	20776	Tmie	transmembrane inner ear
6563	NA	NA	728.333	0.0300396	4748	NA	NA	NA	22340	Vegfb	vascular endothelial growth factor B
8809	4225.67	NA	728.667	0.0300586	2907.67	NA	NA	NA	269951	Idh2	isocitrate dehydrogenase 2 (NADP+), mitochondrial
1713	NA	NA	729.667	0.0301583	NA	NA	NA	NA	12608	Cebpb	CCAAT/enhancer binding protein (C/EBP), beta
3539	NA	NA	730	0.0301802	NA	NA	NA	NA	170460	Stard5	StAR-related lipid transfer (START) domain containing 5
15369	NA	NA	730	0.0301802	3017.33	NA	NA	NA	76491	Abhd14b	abhydrolase domain containing 14b
2763	3617.33	NA	731.667	0.0303136	3015	NA	NA	NA	14766	Gpr56	G protein-coupled receptor 56
2705	3309.33	NA	734.333	0.0305481	3801	NA	NA	NA	14674	Gna13	guanine nucleotide binding protein, alpha 13
1304	4001.33	NA	735.667	0.0306301	NA	NA	2337	NA	118452	Baalc	brain and acute leukemia, cytoplasmic
8816	NA	NA	735.667	0.0306301	NA	NA	NA	NA	269999	Orai3	ORAI calcium release-activated calcium modulator 3
5024	4016	NA	737	0.0307459	2014	NA	NA	NA	20341	Selenbp1	selenium binding protein 1
5444	4446.67	NA	741	0.0311372	3236.33	NA	NA	NA	20892	Stra13	stimulated by retinoic acid 13
1221	NA	NA	741.333	0.0311635	2763	NA	NA	NA	11747	Anxa5	annexin A5
3326	NA	NA	743	0.0312896	3093.33	NA	NA	NA	16548	Khk	ketohexokinase
12956	NA	NA	743	0.0312896	NA	NA	NA	NA	68713	Ifitm1	interferon induced transmembrane protein 1
9939	NA	NA	743.667	0.0313379	NA	NA	NA	NA	433667	Ankrd13c	ankyrin repeat domain 13c
5550	NA	NA	744	0.0313658	NA	NA	2535	NA	210029	Metrnl	meteorin, glial cell differentiation regulator-like
13901	3615.33	NA	746	0.0315079	5625.33	NA	NA	NA	71673	Rnf215	ring finger protein 215
9114	NA	NA	747	0.0315797	3858.67	NA	3167.33	NA	29858	Pmm1	phosphomannomutase 1
2198	1689	NA	747.667	0.0316325	NA	NA	NA	NA	13650	Rhbdf1	rhomboid family 1 (Drosophila)
2821	2736	NA	748	0.0316545	NA	NA	3559.33	NA	14871	Gstt1	glutathione S-transferase, theta 1
9460	3063.67	NA	748	0.0316545	NA	NA	3271.33	NA	328234	Rnf182	ring finger protein 182
15895	3649	NA	754	0.0322142	2959	NA	NA	NA	80837	Rhoj	ras homolog gene family, member J
11722	NA	NA	754.667	0.0322641	NA	NA	NA	NA	664968	2210411K11Rik	RIKEN cDNA 2210411K11 gene
14374	1826.33	NA	758.333	0.032585	NA	NA	NA	NA	72792	2810459M11Rik	RIKEN cDNA 2810459M11 gene
1311	4264.67	NA	759.333	0.0326788	3058	NA	NA	NA	11855	Arhgap5	Rho GTPase activating protein 5
12384	2185.33	NA	759.333	0.0326788	NA	NA	NA	NA	67501	Ccdc50	coiled-coil domain containing 50
9100	2558.33	NA	759.667	0.032711	4316.33	NA	NA	NA	29811	Ndrg2	N-myc downstream regulated gene 2
7976	NA	NA	762.333	0.0329748	NA	NA	NA	NA	23945	Mgll	monoglyceride lipase
1141	4316	NA	764	0.033136	4406.33	NA	NA	NA	11652	Akt2	thymoma viral proto-oncogene 2
10155	NA	NA	766.333	0.0333529	NA	NA	NA	NA	52430	Echdc2	enoyl Coenzyme A hydratase domain containing 2
14173	NA	NA	766.333	0.0333529	NA	NA	2162.33	NA	72168	Aifm3	apoptosis-inducing factor, mitochondrion-associated 3
11514	NA	NA	766.667	0.0333778	NA	NA	NA	NA	66170	Chchd5	coiled-coil-helix-coiled-coil-helix domain containing 5
12681	4550	NA	767.333	0.0334261	2631.33	NA	NA	NA	68024	Hist1h2bc	histone cluster 1, H2bc
16035	NA	NA	767.333	0.0334261	NA	NA	NA	NA	83925	Trps1	trichorhinophalangeal syndrome I (human)
10406	2584.67	NA	769	0.0335844	4510.67	NA	NA	NA	54394	Crlf3	cytokine receptor-like factor 3
1649	NA	NA	771.333	0.0337632	NA	NA	NA	NA	12505	Cd44	CD44 antigen
5074	2725	NA	771.667	0.0337896	NA	NA	NA	NA	20411	Sorbs1	sorbin and SH3 domain containing 1
15081	3455.33	NA	772.333	0.0338409	3174.67	NA	NA	NA	75458	Cklf	chemokine-like factor
14032	NA	NA	773.667	0.0339859	NA	NA	2458.33	NA	71904	Paqr7	progestin and adipoQ receptor family member VII
2267	NA	NA	775	0.0341061	4388	NA	3241.67	NA	13849	Ephx1	epoxide hydrolase 1, microsomal
2861	NA	NA	777.333	0.0343186	2307	NA	NA	NA	14972	H2-K1	histocompatibility 2, K1, K region
4401	NA	NA	778	0.0343962	NA	NA	NA	NA	18797	Plcb3	phospholipase C, beta 3
12972	2131.67	NA	780.667	0.0346087	NA	NA	NA	NA	68738	Acss1	acyl-CoA synthetase short-chain family member 1
11650	NA	NA	784	0.0349531	3614.33	NA	3666.33	NA	66387	Nudt8	nudix (nucleoside diphosphate linked moiety X)-type motif 8
32	NA	NA	785.333	0.0350689	NA	NA	NA	NA	100039968	OTTMUSG00000009332	predicted gene, OTTMUSG00000009332
3156	1834	NA	785.333	0.0350689	NA	NA	NA	NA	16168	Il15	interleukin 15
943	3640	NA	785.667	0.0350967	3102.67	NA	NA	NA	11363	Acadl	acyl-Coenzyme A dehydrogenase, long-chain
12350	3118.67	NA	787.667	0.0352887	3876	NA	NA	NA	67454	1200009F10Rik	RIKEN cDNA 1200009F10 gene
704	3305.67	NA	788.667	0.0353751	3513.33	NA	NA	NA	108705	Pttg1ip	pituitary tumor-transforming 1 interacting protein
10412	1844.33	NA	790.333	0.0355041	NA	NA	NA	NA	54409	Ramp2	receptor (calcitonin) activity modifying protein 2
16220	4249.67	NA	792	0.035636	4290.67	NA	NA	NA	97114	Hist2h3c2	histone cluster 2, H3c2
3087	NA	NA	794.667	0.0358368	NA	NA	2241	NA	15902	Id2	inhibitor of DNA binding 2
1784	NA	NA	796	0.0359437	NA	NA	NA	NA	12759	Clu	clusterin
15308	3284	NA	797.667	0.0360991	4197	NA	NA	NA	76267	Fads1	fatty acid desaturase 1
16175	2076.33	NA	800.333	0.0363335	NA	NA	NA	NA	94187	Zfp423	zinc finger protein 423
2923	1770.67	NA	800.667	0.0363584	NA	NA	NA	NA	15208	Hes5	hairy and enhancer of split 5 (Drosophila)
4886	NA	NA	801.667	0.0364493	NA	NA	NA	NA	19881	Rom1	rod outer segment membrane protein 1
7620	2950.33	NA	807.333	0.0370076	NA	NA	NA	NA	234356	Csgalnact1	chondroitin sulfate N-acetylgalactosaminyltransferase 1
5688	1934.33	NA	809	0.0371776	NA	NA	NA	NA	212974	Athl1	ATH1, acid trehalase-like 1 (yeast)
3308	NA	NA	809.333	0.0372172	NA	NA	2438	NA	16525	Kcnk1	potassium channel, subfamily K, member 1
6899	3548.33	NA	812	0.0374927	4188.67	NA	5306.33	NA	226422	Rab7l1	RAB7, member RAS oncogene family-like 1
11991	1826	NA	812.333	0.037522	4360	NA	NA	NA	66873	1200009O22Rik	RIKEN cDNA 1200009O22 gene
4917	3670.67	NA	813	0.0375791	3809.67	NA	NA	NA	20130	Rras	Harvey rat sarcoma oncogene, subgroup R
13036	NA	NA	813	0.0375791	1987.67	NA	NA	NA	68918	1190005I06Rik	RIKEN cDNA 1190005I06 gene
13324	4594.67	NA	814	0.0376612	5835.67	NA	2784.33	NA	69666	Psmg4	proteasome (prosome, macropain) assembly chaperone 4
12489	4293.33	NA	814.667	0.0377213	2464	NA	NA	NA	67706	Tmem179b	transmembrane protein 179B
15023	NA	NA	816.333	0.0379132	NA	NA	NA	NA	75219	Dusp18	dual specificity phosphatase 18
15585	2604.33	NA	816.333	0.0379132	4078.67	NA	NA	NA	77559	Agl	amylo-1,6-glucosidase, 4-alpha-glucanotransferase
1074	2368	NA	818	0.0380744	4682.67	NA	NA	NA	11520	Adfp	adipose differentiation related protein
8622	2127	NA	820	0.0382488	NA	NA	NA	NA	268396	Sh3pxd2b	SH3 and PX domains 2B
7402	NA	NA	823	0.0385873	NA	NA	NA	NA	231830	Micall2	MICAL-like 2
786	NA	NA	823.333	0.0386196	NA	NA	NA	NA	109333	Pkn2	protein kinase N2
8316	NA	NA	823.333	0.0386196	2137	NA	NA	NA	244058	Rgma	RGM domain family, member A
2053	4625	NA	824.333	0.0387104	4866.33	NA	3961.33	NA	13202	Ddt	D-dopachrome tautomerase
13524	NA	NA	824.667	0.0387529	NA	NA	NA	NA	70315	Hdac8	histone deacetylase 8
4684	1600.33	NA	825.333	0.0388277	NA	NA	NA	NA	19283	Ptprz1	protein tyrosine phosphatase, receptor type Z, polypeptide 1
11446	1630	NA	825.333	0.0388277	NA	NA	NA	NA	66058	Tmem176a	transmembrane protein 176A
14757	NA	NA	826.333	0.0389361	3281.67	NA	NA	NA	74245	Ctbs	chitobiase, di-N-acetyl-
2274	NA	NA	827.333	0.0390108	2004	NA	NA	NA	13858	Eps15	epidermal growth factor receptor pathway substrate 15
13377	3936	NA	827.333	0.0390108	3395	NA	NA	NA	69786	Tprkb	Tp53rk binding protein
5338	3998.67	NA	828	0.0390695	1914.33	NA	NA	NA	20787	Srebf1	sterol regulatory element binding transcription factor 1
12995	2055.67	NA	829.333	0.0392321	NA	NA	NA	NA	68797	Pdgfrl	platelet-derived growth factor receptor-like
15828	3196.67	NA	829.333	0.0392321	5121.33	NA	4913.33	NA	78929	Polr3h	polymerase (RNA) III (DNA directed) polypeptide H
4986	NA	NA	830	0.0393098	NA	NA	NA	NA	20286	Zc3h7b	zinc finger CCCH type containing 7B
3231	2050	NA	831	0.0394329	NA	NA	NA	NA	16407	Itgae	integrin alpha E, epithelial-associated
5974	3536.33	NA	835.667	0.039874	2836.33	NA	NA	NA	216190	Appl2	adaptor protein, phosphotyrosine interaction, PH domain and leucine zipper containing 2
2592	NA	NA	838.333	0.0401407	NA	NA	NA	NA	14426	Galnt4	UDP-N-acetyl-alpha-D-galactosamine:polypeptide N-acetylgalactosaminyltransferase 4
16061	NA	NA	840	0.0403019	NA	NA	NA	NA	84653	Hes7	hairy and enhancer of split 7 (Drosophila)
7530	NA	NA	840.333	0.0403239	NA	NA	NA	NA	233115	Dpy19l3	dpy-19-like 3 (C. elegans)
11329	NA	NA	840.333	0.0403239	NA	NA	NA	NA	64213	St7	Suppression of tumorigenicity 7
8592	NA	NA	841.333	0.0404162	3031.33	NA	NA	NA	26558	Homer3	homer homolog 3 (Drosophila)
13602	NA	NA	845	0.040743	4498.67	NA	2807.67	NA	70556	Slc25a33	solute carrier family 25, member 33
344	NA	NA	845.333	0.0407649	NA	NA	NA	NA	103844	AI842396	expressed sequence AI842396
7178	NA	NA	847.667	0.0409584	3248.67	NA	NA	NA	229445	Ctso	cathepsin O
546	3522.33	NA	851	0.0413262	2749	NA	NA	NA	107022	Gramd3	GRAM domain containing 3
4874	NA	NA	851	0.0413262	NA	NA	NA	NA	19775	Xpr1	xenotropic and polytropic retrovirus receptor 1
4641	NA	NA	855.667	0.0417512	NA	NA	NA	NA	19247	Ptpn11	protein tyrosine phosphatase, non-receptor type 11
156	NA	NA	861.333	0.0422699	NA	NA	NA	NA	100340	Smpdl3b	sphingomyelin phosphodiesterase, acid-like 3B
1436	1708	NA	862	0.0423329	NA	NA	NA	NA	12140	Fabp7	fatty acid binding protein 7, brain
15313	NA	NA	862	0.0423329	NA	NA	NA	NA	76294	Asb5	ankyrin repeat and SOCs box-containing 5
3029	4452.67	NA	863	0.0424546	3119.33	NA	NA	NA	15473	Hrsp12	heat-responsive protein 12
5820	1872.67	NA	863.333	0.0424941	NA	NA	NA	NA	21415	Tcf3	transcription factor 3
13745	NA	NA	863.333	0.0424941	NA	NA	2138.33	NA	71020	Spats1	spermatogenesis associated, serine-rich 1
4419	NA	NA	865	0.0426334	NA	NA	NA	NA	18830	Pltp	phospholipid transfer protein
11616	NA	NA	867.667	0.0428869	NA	NA	NA	NA	66333	Aqp11	aquaporin 11
5511	1807	NA	868.667	0.0430026	NA	NA	NA	NA	20947	Swap70	SWA-70 protein
15089	NA	NA	871.667	0.043306	NA	NA	NA	NA	75472	1700009P17Rik	RIKEN cDNA 1700009P17 gene
16154	NA	NA	873.333	0.0434804	4232.33	NA	2607.67	NA	94065	Mrpl34	mitochondrial ribosomal protein L34
8304	4129	NA	874.333	0.0435917	5702.67	NA	3635.67	NA	243912	Hspb6	heat shock protein, alpha-crystallin-related, B6
834	3853.67	NA	876	0.0437691	4310.67	NA	NA	NA	110078	Pygb	brain glycogen phosphorylase
3922	NA	NA	878	0.0439273	3518.67	NA	NA	NA	17855	Mvk	mevalonate kinase
5558	NA	NA	880	0.0441281	NA	NA	NA	NA	210126	Lpp	LIM domain containing preferred translocation partner in lipoma
7119	2321.33	NA	880.667	0.0441808	4343.33	NA	NA	NA	228608	Smox	spermine oxidase
7049	2307	NA	881	0.0442057	NA	NA	NA	NA	22771	Zic1	zinc finger protein of the cerebellum 1
5762	NA	NA	882.667	0.0443831	2803.67	NA	NA	NA	213649	Arhgef19	Rho guanine nucleotide exchange factor (GEF) 19
11481	3853.33	NA	884.667	0.0445941	3434.33	NA	5462.33	NA	66116	Cml1	camello-like 1
13289	3372.33	NA	886.333	0.0447538	4502.33	NA	5211.67	NA	69574	Cmbl	carboxymethylenebutenolidase-like (Pseudomonas)
16256	NA	NA	888.333	0.0449414	NA	NA	2378.67	NA	98388	Chst10	carbohydrate sulfotransferase 10
2523	3641	NA	890.333	0.045129	5248	NA	4501.67	NA	14297	Fxn	frataxin
13279	4060	NA	891.667	0.0452696	2434.33	NA	NA	NA	69551	2310022B05Rik	RIKEN cDNA 2310022B05 gene
4759	2312	NA	893	0.0454235	5407	NA	NA	NA	19376	Rab34	RAB34, member of RAS oncogene family
885	NA	NA	896	0.04574	NA	NA	NA	NA	110695	Aldh7a1	aldehyde dehydrogenase family 7, member A1
349	2008	NA	897.333	0.0458455	NA	NA	NA	NA	103978	Gpc5	glypican 5
14397	4001.33	NA	899	0.0460082	2215.67	NA	NA	NA	72927	Hepacam	hepatocyte cell adhesion molecule
9099	NA	NA	901	0.0461855	2042.67	NA	NA	NA	29810	Bag3	BCL2-associated athanogene 3
332	NA	NA	901.333	0.0462192	NA	NA	NA	NA	103724	Tbc1d10a	TBC1 domain family, member 10a
4971	NA	NA	901.333	0.0462192	NA	NA	NA	NA	20255	Scg3	secretogranin III
10414	NA	NA	903	0.0464097	NA	NA	NA	NA	54418	Fmn2	formin 2
4585	3798.33	NA	903.667	0.0464683	5058.33	NA	4527.67	NA	192156	Mvd	mevalonate (diphospho) decarboxylase
7245	2776	NA	903.667	0.0464683	NA	NA	NA	NA	230103	Npr2	natriuretic peptide receptor 2
11701	4404.67	NA	907	0.0468186	4960.33	NA	4079.67	NA	66459	Pigy	phosphatidylinositol glycan anchor biosynthesis, class Y
15720	NA	NA	907	0.0468186	NA	NA	NA	NA	78339	Ttyh3	tweety homolog 3 (Drosophila)
10613	4293.33	NA	907.667	0.046908	2620.67	NA	NA	NA	56213	Htra1	HtrA serine peptidase 1
11337	NA	NA	908.667	0.0469974	NA	NA	2360	NA	64295	Tmub1	transmembrane and ubiquitin-like domain containing 1
12936	NA	NA	908.667	0.0469974	2833.33	NA	NA	NA	68646	1110020G09Rik	RIKEN cDNA 1110020G09 gene
7230	NA	NA	909.333	0.0470736	1999.67	NA	NA	NA	229905	Ccbl2	cysteine conjugate-beta lyase 2
10748	NA	NA	910.333	0.0471747	2734.33	NA	NA	NA	56458	Foxo1	forkhead box O1
15499	NA	NA	912	0.0473579	3449.67	NA	NA	NA	76927	1700021C14Rik	RIKEN cDNA 1700021C14 gene
6802	NA	NA	917	0.0478927	4891.67	NA	3465	NA	225724	Mapk4	mitogen-activated protein kinase 4
9199	2452.33	NA	917	0.0478927	NA	NA	NA	NA	319190	Hist2h2be	histone cluster 2, H2be
10103	3322.33	NA	917	0.0478927	NA	NA	3270.33	NA	51801	Ramp1	receptor (calcitonin) activity modifying protein 1
5213	NA	NA	917.333	0.047925	4074.67	NA	2364.67	NA	20648	Snta1	syntrophin, acidic 1
11410	4858.67	NA	917.333	0.047925	2404.67	NA	5241	NA	652925	4930420K17Rik	RIKEN cDNA 4930420K17 gene
14088	NA	NA	919	0.0480994	2652	NA	NA	NA	71998	Slc25a35	solute carrier family 25, member 35
537	3804	NA	920.667	0.0483221	3274	NA	NA	NA	106861	Abhd3	abhydrolase domain containing 3
11482	4311	NA	921	0.0483485	5074	NA	4066	NA	66117	Fmc1	formation of mitochondrial complexes 1 homolog (S. cerevisiae)
11839	NA	NA	922.333	0.0485141	NA	NA	NA	NA	66659	Acp6	acid phosphatase 6, lysophosphatidic
12553	4831	NA	926.333	0.0489215	4686.67	NA	NA	NA	67815	Sec14l2	SEC14-like 2 (S. cerevisiae)
1452	2485	NA	926.667	0.0489552	NA	NA	NA	NA	12166	Bmpr1a	bone morphogenetic protein receptor, type 1A
16011	NA	NA	928.667	0.0491632	NA	NA	NA	NA	83673	Snhg1	small nucleolar RNA host gene (non-protein coding) 1
12157	1634.67	NA	930.667	0.0493538	NA	NA	NA	NA	67122	Nrarp	Notch-regulated ankyrin repeat protein
15105	2938	NA	934	0.0496761	4426	NA	5439	NA	75516	Ttc32	tetratricopeptide repeat domain 32
5045	NA	NA	934.333	0.0497157	1849.67	NA	NA	NA	20363	Sepp1	selenoprotein P, plasma, 1
12146	NA	NA	934.333	0.0497157	NA	NA	NA	NA	67103	Ptgr1	prostaglandin reductase 1
10153	NA	NA	934.667	0.0497494	NA	NA	NA	NA	52398	40432	septin 11
6723	NA	NA	935	0.0497846	2939.67	NA	NA	NA	224650	Anks1	ankyrin repeat and SAM domain containing 1
16224	NA	NA	936.667	0.0499707	2487.33	NA	NA	NA	97212	Hadha	hydroxyacyl-Coenzyme A dehydrogenase/3-ketoacyl-Coenzyme A thiolase/enoyl-Coenzyme A hydratase (trifunctional protein), alpha subunit

## Sheet: Oligodendrocyte - Table 1
Row	OPC_SI	OPC_pSI	Astrocyte_SI	Astrocyte_pSI	Oligodendroctye_SI	Oligodendrocyte_pSI	Neuron_SI	Neuron_pSI	Entrez	Symbol	Name
5632	2122.67	NA	NA	NA	37	0.000115588	NA	NA	211945	Plekhh1	pleckstrin homology domain containing, family H (with MyTH4 domain) member 1
8059	2204	NA	NA	NA	42	0.00016375	NA	NA	240168	Rasgrp3	RAS, guanyl releasing protein 3
3843	2225.33	NA	NA	NA	43	0.00016375	NA	NA	17433	Mobp	myelin-associated oligodendrocytic basic protein
15360	2125.67	NA	NA	NA	47.3333	0.000176593	NA	NA	76477	Pcolce2	procollagen C-endopeptidase enhancer 2
3846	1961.67	NA	NA	NA	52	0.000211912	NA	NA	17441	Mog	myelin oligodendrocyte glycoprotein
7877	2185.33	NA	NA	NA	53.3333	0.000221544	NA	NA	23831	Car14	carbonic anhydrase 14
7199	2354.67	NA	NA	NA	57.3333	0.000263285	NA	NA	229595	Adamtsl4	ADAMTS-like 4
7565	2277.33	NA	NA	NA	58.6667	0.000272917	NA	NA	233752	Insc	inscuteable homolog (Drosophila)
4689	NA	NA	NA	NA	61	0.00028576	NA	NA	192897	Itgb4	integrin beta 4
14631	2141	NA	NA	NA	64	0.000311446	NA	NA	74008	Arsg	arylsulfatase G
2676	NA	NA	NA	NA	66.6667	0.000340344	NA	NA	14618	Gjb1	gap junction protein, beta 1
16046	NA	NA	NA	NA	68	0.000353187	NA	NA	84004	Mcam	melanoma cell adhesion molecule
5434	2093.67	NA	NA	NA	68.3333	0.000356397	NA	NA	208795	Tmem63a	transmembrane protein 63a
14268	2165.33	NA	NA	NA	69.6667	0.000367635	NA	NA	72446	2600010E01Rik	RIKEN cDNA 2600010E01 gene
11417	2082.33	NA	NA	NA	71	0.000372451	NA	NA	654818	C030030A07Rik	RIKEN cDNA C030030A07 gene
15350	NA	NA	NA	NA	71.3333	0.000372451	NA	NA	76438	Rftn1	raftlin lipid raft linker 1
8450	NA	NA	NA	NA	71.6667	0.000377268	NA	NA	246707	Emilin2	elastin microfibril interfacer 2
12862	1961	NA	NA	NA	74.3333	0.000399743	NA	NA	68458	Ppp1r14a	protein phosphatase 1, regulatory (inhibitor) subunit 14A
8190	NA	NA	NA	NA	74.6667	0.000406165	NA	NA	242037	Gm410	gene model 410, (NCBI)
2309	2200.67	NA	4906	NA	77	0.000423824	NA	NA	14017	Evi2a	ecotropic viral integration site 2a
6372	2235.67	NA	NA	NA	79.3333	0.000451116	NA	NA	21952	Tnni1	troponin I, skeletal, slow 1
891	NA	NA	NA	NA	80	0.000455932	NA	NA	110789	Gpr98	G protein-coupled receptor 98
1305	NA	NA	NA	NA	82.3333	0.000480013	NA	NA	118454	Gjc2	gap junction protein, gamma 2
12975	2340.33	NA	5121	NA	84.6667	0.000492856	NA	NA	68743	Anln	anillin, actin binding protein
14620	NA	NA	NA	NA	88	0.000549045	NA	NA	73940	Hapln2	hyaluronan and proteoglycan link protein 2
6416	1992	NA	NA	NA	92	0.000600417	NA	NA	22041	Trf	transferrin
580	2392.67	NA	NA	NA	100.667	0.00067266	NA	NA	107449	Unc5b	unc-5 homolog B (C. elegans)
2832	2376	NA	NA	NA	103.333	0.000690319	NA	NA	14912	Nkx6-2	NK6 homeobox 2
4110	NA	NA	NA	NA	103.667	0.000691925	NA	NA	18175	Nrap	nebulin-related anchoring protein
5336	NA	NA	NA	NA	104.667	0.00071119	NA	NA	207839	Galnt6	UDP-N-acetyl-alpha-D-galactosamine:polypeptide N-acetylgalactosaminyltransferase 6
9621	2450.33	NA	NA	NA	107.333	0.00075293	NA	NA	338367	Myo1d	myosin ID
3996	2461.33	NA	NA	NA	108.667	0.000789854	NA	NA	17988	Ndrg1	N-myc downstream regulated gene 1
7286	2013.33	NA	NA	NA	109	0.000789854	NA	NA	230678	Tmem125	transmembrane protein 125
15627	1976.33	NA	NA	NA	109	0.000789854	NA	NA	77767	Ermn	ermin, ERM-like protein
13613	2031.67	NA	NA	NA	109.667	0.000793065	NA	NA	70574	Cpm	carboxypeptidase M
16230	2197.33	NA	NA	NA	110	0.00079467	NA	NA	97440	B3gnt9	UDP-GlcNAc:betaGal beta-1,3-N-acetylglucosaminyltransferase 9
5689	NA	NA	NA	NA	114	0.000849253	NA	NA	212980	Slc45a3	solute carrier family 45, member 3
8897	2035	NA	NA	NA	116.333	0.000886178	NA	NA	27219	Sgk2	serum/glucocorticoid regulated kinase 2
8108	2036.67	NA	NA	NA	124.667	0.00100819	NA	NA	240690	St18	suppression of tumorigenicity 18
5696	2085.67	NA	NA	NA	129	0.00105956	NA	NA	213019	Pdlim2	PDZ and LIM domain 2
6207	NA	NA	NA	NA	129.333	0.00106117	NA	NA	21810	Tgfbi	transforming growth factor, beta induced
9117	2148	NA	NA	NA	135.667	0.00115909	NA	NA	29862	Ninj2	ninjurin 2
10386	NA	NA	NA	NA	136.667	0.00117033	NA	NA	54357	Epb4.1l4b	erythrocyte protein band 4.1-like 4b
3	NA	NA	NA	NA	137.667	0.00117836	NA	NA	100017	Ldlrap1	low density lipoprotein receptor adaptor protein 1
2306	NA	NA	NA	NA	138.333	0.0011912	NA	NA	14009	Etv1	ets variant gene 1
599	NA	NA	NA	NA	138.667	0.00120244	NA	NA	107607	Nod1	nucleotide-binding oligomerization domain containing 1
16216	NA	NA	NA	NA	140.667	0.00122492	NA	NA	97031	C430004E15Rik	RIKEN cDNA C430004E15 gene
5764	NA	NA	NA	NA	142.333	0.00125381	NA	NA	21367	Cntn2	contactin 2
3687	1936	NA	NA	NA	150.333	0.00138224	NA	NA	17136	Mag	myelin-associated glycoprotein
1300	2262.33	NA	NA	NA	151.333	0.00139348	NA	NA	118446	Gje1	gap junction membrane channel protein epsilon 1
16039	2221.67	NA	4754.33	NA	152	0.00140311	NA	NA	83964	Jam3	junction adhesion molecule 3
6854	1929.67	NA	NA	NA	152.333	0.00140793	NA	NA	226115	Opalin	oligodendrocytic myelin paranodal and inner loop protein
14827	NA	NA	NA	NA	152.667	0.00141114	NA	NA	74407	Ttc25	tetratricopeptide repeat domain 25
937	NA	NA	NA	NA	154	0.00142559	NA	NA	11305	Abca2	ATP-binding cassette, sub-family A (ABC1), member 2
5565	2286.33	NA	NA	NA	155.667	0.00144164	NA	NA	210293	Dock10	dedicator of cytokinesis 10
304	NA	NA	NA	NA	162	0.0015765	NA	NA	103142	Rdh9	retinol dehydrogenase 9
448	2437.67	NA	NA	NA	167	0.00168566	NA	NA	105439	Slain1	SLAIN motif family, member 1
6176	2464.67	NA	NA	NA	171	0.00175148	NA	NA	217826	Kcnk13	potassium channel, subfamily K, member 13
16191	2213.33	NA	NA	NA	173	0.00179483	NA	NA	94226	S1pr5	sphingosine-1-phosphate receptor 5
2581	NA	NA	NA	NA	175	0.00185584	NA	NA	14409	Gabrr2	gamma-aminobutyric acid (GABA-C) receptor, subunit rho 2
4541	NA	NA	NA	NA	176	0.00188473	NA	NA	19144	Klk6	kallikrein related-peptidase 6
8657	NA	NA	NA	NA	178	0.00193771	NA	NA	268759	9930012K11Rik	RIKEN cDNA 9930012K11 gene
12044	2110.67	NA	NA	NA	178.333	0.00194413	NA	NA	66949	Trim59	tripartite motif-containing 59
8129	2098	NA	NA	NA	179	0.00196179	NA	NA	240913	Adamts4	a disintegrin-like and metallopeptidase (reprolysin type) with thrombospondin type 1 motif, 4
15624	NA	NA	NA	NA	179	0.00196179	NA	NA	77739	Adamtsl1	ADAMTS-like 1
4024	NA	NA	NA	NA	180.333	0.00200353	NA	NA	18025	Nfe2l3	nuclear factor, erythroid derived 2, like 3
5628	NA	NA	NA	NA	181	0.00201638	NA	NA	211896	Depdc7	DEP domain containing 7
2750	1981.67	NA	NA	NA	181.333	0.0020244	NA	NA	14745	Lpar1	lysophosphatidic acid receptor 1
10841	NA	NA	NA	NA	181.333	0.0020244	NA	NA	56720	Tdo2	tryptophan 2,3-dioxygenase
1963	2322	NA	NA	NA	183.333	0.00207096	NA	NA	13038	Ctsk	cathepsin K
5814	2072	NA	NA	NA	186	0.00212875	NA	NA	214112	9530066K23Rik	RIKEN cDNA 9530066K23 gene
9302	2444.33	NA	5404	NA	186.667	0.00215123	NA	NA	320111	Prr18	proline rich region 18
1042	2405.33	NA	4461.33	NA	187.333	0.0021737	NA	NA	11484	Aspa	aspartoacylase
6102	3153.67	NA	3876.67	NA	188.333	0.00219297	NA	NA	217258	Abca8a	ATP-binding cassette, sub-family A (ABC1), member 8a
9447	NA	NA	NA	NA	189.333	0.00222347	2961.67	NA	327959	Xaf1	XIAP associated factor 1
1275	NA	NA	NA	NA	191	0.00225558	NA	NA	11815	Apod	apolipoprotein D
2047	2169	NA	5090	NA	192	0.00227163	NA	NA	13195	Ddc	dopa decarboxylase
376	2837	NA	NA	NA	193	0.0022925	NA	NA	104252	Cdc42ep2	CDC42 effector protein (Rho GTPase binding) 2
3643	NA	NA	NA	NA	197	0.00237919	NA	NA	170952	Prima1	proline rich membrane anchor 1
4277	1999.33	NA	NA	NA	197.333	0.00239364	NA	NA	18584	Pde8a	phosphodiesterase 8A
9464	NA	NA	NA	NA	201.667	0.00251405	NA	NA	328329	Mast4	microtubule associated serine/threonine kinase family member 4
2236	NA	NA	NA	NA	203.333	0.00257024	NA	NA	13799	En2	engrailed 2
4197	2031	NA	4794	NA	204.333	0.00258308	NA	NA	18417	Cldn11	claudin 11
12823	3476	NA	4163	NA	204.667	0.0025879	NA	NA	68312	Gstm7	glutathione S-transferase, mu 7
1811	2484.67	NA	4684.67	NA	210.667	0.00275486	NA	NA	12799	Cnp	2',3'-cyclic nucleotide 3' phosphodiesterase
2503	NA	NA	NA	NA	211	0.00276609	NA	NA	142681	Slc34a3	solute carrier family 34 (sodium phosphate), member 3
15913	NA	NA	NA	NA	214.333	0.00283994	NA	NA	80893	Tmprss5	transmembrane protease, serine 5 (spinesin)
289	1923.33	NA	NA	NA	215	0.00284797	NA	NA	102693	Phldb1	pleckstrin homology-like domain, family B, member 1
1043	NA	NA	NA	NA	217.667	0.00292663	NA	NA	11486	Ada	adenosine deaminase
9488	NA	NA	NA	NA	218.667	0.00294911	NA	NA	329064	Pkd2l1	polycystic kidney disease 2-like 1
11548	3980.33	NA	2730	NA	218.667	0.00294911	NA	NA	66222	Serpinb1a	serine (or cysteine) peptidase inhibitor, clade B, member 1a
15656	2963	NA	NA	NA	219.667	0.00297801	NA	NA	77938	Fam53b	family with sequence similarity 53, member B
7201	NA	NA	NA	NA	221.667	0.00303901	NA	NA	229600	BC028528	cDNA sequence BC028528
6794	NA	NA	NA	NA	222	0.00305025	NA	NA	225608	Sh3tc2	SH3 domain and tetratricopeptide repeats 2
6352	2507	NA	5048	NA	222.667	0.0030647	NA	NA	21930	Tnfaip6	tumor necrosis factor alpha induced protein 6
2732	2360.33	NA	NA	NA	223	0.00307594	NA	NA	14709	Gng8	guanine nucleotide binding protein (G protein), gamma 8
2760	3024	NA	3949.67	NA	223.333	0.00308396	NA	NA	14763	Gpr37	G protein-coupled receptor 37
3895	NA	NA	NA	NA	224.333	0.00311928	NA	NA	17761	Mtap7	microtubule-associated protein 7
10842	2174.67	NA	4663	NA	225	0.00312731	NA	NA	56722	Litaf	LPS-induced TN factor
5124	2233	NA	NA	NA	227	0.00316584	NA	NA	20496	Slc12a2	solute carrier family 12, member 2
6117	NA	NA	NA	NA	231.667	0.00331996	NA	NA	217353	Tmc6	transmembrane channel-like gene family 6
2942	NA	NA	NA	NA	234.333	0.00338738	NA	NA	15245	Hhip	Hedgehog-interacting protein
8499	NA	NA	NA	NA	234.333	0.00338738	NA	NA	263406	Plekhg3	pleckstrin homology domain containing, family G (with RhoGef domain) member 3
11107	3433	NA	NA	NA	234.333	0.00338738	3305	NA	58869	Pex5l	peroxisomal biogenesis factor 5-like
6193	2495	NA	NA	NA	235.667	0.00341949	NA	NA	217893	Pacs2	phosphofurin acidic cluster sorting protein 2
13000	NA	NA	NA	NA	236.333	0.00343715	NA	NA	68813	Dock5	dedicator of cytokinesis 5
11293	NA	NA	NA	NA	236.667	0.00344999	NA	NA	63953	Dusp10	dual specificity phosphatase 10
14890	2057.33	NA	NA	NA	237	0.00346284	NA	NA	74559	Elovl7	ELOVL family member 7, elongation of long chain fatty acids (yeast)
12174	NA	NA	NA	NA	242.667	0.00365388	NA	NA	67149	Nkain1	Na+/K+ transporting ATPase interacting 1
222	2566.33	NA	NA	NA	245.333	0.0037213	NA	NA	101565	6330503K22Rik	RIKEN cDNA 6330503K22 gene
3422	NA	NA	NA	NA	246	0.00374699	NA	NA	16773	Lama2	laminin, alpha 2
13483	NA	NA	NA	NA	248	0.00381281	NA	NA	70134	2210011C24Rik	RIKEN cDNA 2210011C24 gene
1185	2306.67	NA	NA	NA	249	0.0038401	NA	NA	116972	Fam57a	family with sequence similarity 57, member A
16144	NA	NA	NA	NA	253	0.00395087	NA	NA	93961	B3galt5	UDP-Gal:betaGlcNAc beta 1,3-galactosyltransferase, polypeptide 5
4336	2269.67	NA	NA	NA	254.333	0.00398619	NA	NA	18700	Piga	phosphatidylinositol glycan anchor biosynthesis, class A
12556	2607.67	NA	NA	NA	265.333	0.00435222	NA	NA	67824	Nmral1	NmrA-like family domain containing 1
7782	2665.33	NA	NA	NA	267.667	0.00442768	NA	NA	237010	Klhl4	kelch-like 4 (Drosophila)
934	NA	NA	NA	NA	271	0.0045224	NA	NA	11302	Aatk	apoptosis-associated tyrosine kinase
4417	NA	NA	NA	NA	272	0.00453524	NA	NA	18826	Lcp1	lymphocyte cytosolic protein 1
9180	NA	NA	NA	NA	273.333	0.00458501	3439.67	NA	30948	Bin1	bridging integrator 1
9133	NA	NA	NA	NA	276.667	0.00471183	NA	NA	30049	Scd3	stearoyl-coenzyme A desaturase 3
12145	2513.33	NA	4805.33	NA	277.333	0.00472949	NA	NA	67102	D16Ertd472e	DNA segment, Chr 16, ERATO Doi 472, expressed
446	2143	NA	NA	NA	277.667	0.00473431	NA	NA	105418	E330034G19Rik	RIKEN cDNA E330034G19 gene
2163	NA	NA	NA	NA	277.667	0.00473431	NA	NA	13590	Lefty1	left right determination factor 1
940	2706.33	NA	NA	NA	279.333	0.00478407	NA	NA	11350	Abl1	c-abl oncogene 1, receptor tyrosine kinase
15548	NA	NA	NA	NA	281	0.00484026	NA	NA	77116	Mtmr2	myotubularin related protein 2
12508	NA	NA	NA	NA	283.667	0.00495264	NA	NA	67731	Fbxo32	F-box protein 32
15725	NA	NA	NA	NA	285.667	0.00502007	NA	NA	78388	Mvp	major vault protein
3545	NA	NA	NA	NA	286	0.00502809	NA	NA	170574	Sp7	Sp7 transcription factor 7
5094	NA	NA	NA	NA	286.667	0.00505378	NA	NA	20447	St6galnac3	ST6 (alpha-N-acetyl-neuraminyl-2,3-beta-galactosyl-1,3)-N-acetylgalactosaminide alpha-2,6-sialyltransferase 3
10154	3880.33	NA	3419	NA	287.667	0.00508107	NA	NA	52428	Rhpn2	rhophilin, Rho GTPase binding protein 2
15246	2410.67	NA	NA	NA	290	0.00518703	NA	NA	75965	Zdhhc20	zinc finger, DHHC domain containing 20
5161	3156.33	NA	4089	NA	292	0.00525124	NA	NA	20535	Slc4a2	solute carrier family 4 (anion exchanger), member 2
7605	2343.67	NA	NA	NA	292	0.00525124	NA	NA	234094	Arhgef10	Rho guanine nucleotide exchange factor (GEF) 10
14796	3008.67	NA	NA	NA	292.667	0.00528656	NA	NA	74335	Xrcc3	X-ray repair complementing defective repair in Chinese hamster cells 3
4914	3152	NA	NA	NA	293.333	0.00531707	NA	NA	20111	Rps6ka1	ribosomal protein S6 kinase polypeptide 1
8060	3617	NA	NA	NA	294	0.00535559	NA	NA	24017	Rnf13	ring finger protein 13
10612	2552	NA	4558.67	NA	295.333	0.00541178	NA	NA	56212	Rhog	ras homolog gene family, member G
7170	2854.67	NA	NA	NA	297.667	0.00550971	NA	NA	229285	Spg20	spastic paraplegia 20, spartin (Troyer syndrome) homolog (human)
9269	2337.67	NA	4866	NA	298	0.00551613	NA	NA	319880	Tmcc3	transmembrane and coiled coil domains 3
2194	2331.33	NA	5932.67	NA	298.667	0.00554985	NA	NA	13643	Efnb3	ephrin B3
10041	1923.67	NA	NA	NA	298.667	0.00554985	NA	NA	50784	Ppap2c	phosphatidic acid phosphatase type 2c
2379	2692	NA	NA	NA	300.333	0.00563012	NA	NA	14081	Acsl1	acyl-CoA synthetase long-chain family member 1
2896	2118	NA	NA	NA	301	0.00567346	NA	NA	15160	Serpind1	serine (or cysteine) peptidase inhibitor, clade D, member 1
13636	NA	NA	NA	NA	301.333	0.00568631	NA	NA	70652	Tmem144	transmembrane protein 144
13743	NA	NA	NA	NA	306.667	0.00585808	NA	NA	71007	D7Ertd443e	DNA segment, Chr 7, ERATO Doi 443, expressed
4267	NA	NA	NA	NA	309	0.00596404	NA	NA	18571	Pdcd6ip	programmed cell death 6 interacting protein
5017	NA	NA	NA	NA	310.667	0.00600417	NA	NA	20324	Sdpr	serum deprivation response
16251	3812.33	NA	2681.67	NA	313	0.00612297	NA	NA	98363	Efhd1	EF hand domain containing 1
12888	2500.67	NA	NA	NA	317.667	0.00634452	NA	NA	68519	Eml1	echinoderm microtubule associated protein like 1
12775	NA	NA	NA	NA	320	0.00644887	NA	NA	68214	Gsto2	glutathione S-transferase omega 2
9388	NA	NA	NA	NA	320.667	0.00647777	NA	NA	320709	Tmem117	transmembrane protein 117
10068	NA	NA	NA	NA	321.333	0.00651951	NA	NA	50905	Il17rb	interleukin 17 receptor B
2704	NA	NA	NA	NA	322.333	0.00657248	NA	NA	14673	Gna12	guanine nucleotide binding protein, alpha 12
7447	NA	NA	2989	NA	322.333	0.00657248	NA	NA	232288	Frmd4b	FERM domain containing 4B
7202	2173.67	NA	NA	NA	323.667	0.00662386	NA	NA	229603	Otud7b	OTU domain containing 7B
13656	1918.33	NA	NA	NA	326	0.00671215	NA	NA	70747	Tspan2	tetraspanin 2
5929	NA	NA	NA	NA	328	0.00681329	NA	NA	215653	Rassf2	Ras association (RalGDS/AF-6) domain family member 2
2346	1878.33	NA	NA	NA	331	0.00697704	NA	NA	140571	Plxnb3	plexin B3
11738	NA	NA	NA	NA	334	0.0071135	NA	NA	665146	EG665146	predicted gene, EG665146
12479	NA	NA	NA	NA	334.667	0.0071424	NA	NA	67689	Aldh3b1	aldehyde dehydrogenase 3 family, member B1
4470	3414	NA	3659.67	NA	336.667	0.00721625	NA	NA	19024	Ppfibp2	protein tyrosine phosphatase, receptor-type, F interacting protein, binding protein 2
3168	NA	NA	NA	NA	337	0.0072307	NA	NA	16180	Il1rap	interleukin 1 receptor accessory protein
10054	NA	NA	NA	NA	337.333	0.00724514	NA	NA	50799	Slc25a13	solute carrier family 25 (mitochondrial carrier, adenine nucleotide translocator), member 13
8017	NA	NA	NA	NA	343.667	0.0075598	2634	NA	239827	Pigz	phosphatidylinositol glycan anchor biosynthesis, class Z
12546	1844.33	NA	NA	NA	343.667	0.0075598	NA	NA	67801	Pllp	plasma membrane proteolipid
6211	NA	NA	NA	NA	345	0.00764649	NA	NA	218121	Mboat1	membrane bound O-acyltransferase domain containing 1
9374	NA	NA	NA	NA	347.333	0.00777974	NA	NA	320609	Fam40b	family with sequence similarity 40, member B
13458	NA	NA	NA	NA	349.667	0.0078857	NA	NA	70054	Ccdc89	coiled-coil domain containing 89
1098	2912.33	NA	6696	NA	350	0.00790175	3966	NA	11565	Adssl1	adenylosuccinate synthetase like 1
15485	2973	NA	4082.33	NA	350.667	0.00794028	NA	NA	76893	Lass2	LAG1 homolog, ceramide synthase 2
361	2599.33	NA	NA	NA	351.667	0.00799647	NA	NA	104086	Cyp27a1	cytochrome P450, family 27, subfamily a, polypeptide 1
11790	3131.67	NA	5690.33	NA	352	0.00802055	4729.67	NA	66597	Trim13	tripartite motif-containing 13
9951	NA	NA	NA	NA	354.333	0.00810563	NA	NA	433956	Heatr2	HEAT repeat containing 2
12140	2437	NA	4468.33	NA	355	0.00814416	NA	NA	67092	Gatm	glycine amidinotransferase (L-arginine:glycine amidinotransferase)
9128	3120.33	NA	3639	NA	356.667	0.00820999	NA	NA	29876	Clic4	chloride intracellular channel 4 (mitochondrial)
6825	1850	NA	NA	NA	360	0.00837695	NA	NA	225908	Gm98	gene model 98, (NCBI)
6505	1815.67	NA	NA	NA	360.333	0.00838658	NA	NA	22239	Ugt8a	UDP galactosyltransferase 8A
336	2472.67	NA	4269	NA	360.667	0.00839942	NA	NA	103743	Tmem98	transmembrane protein 98
9301	2336.33	NA	NA	NA	363.333	0.00852625	NA	NA	320091	Ano4	anoctamin 4
8163	NA	NA	NA	NA	364.667	0.00856959	NA	NA	24131	Ldb3	LIM domain binding 3
160	2157.67	NA	4825	NA	366	0.00864184	NA	NA	100434	Slc44a1	solute carrier family 44, member 1
14016	NA	NA	NA	NA	366.667	0.00866431	NA	NA	71878	Fam83d	family with sequence similarity 83, member D
12656	NA	NA	3225.67	NA	369	0.00879114	4688	NA	67971	Tppp3	tubulin polymerization-promoting protein family member 3
5412	NA	NA	NA	NA	369.333	0.0088104	NA	NA	208647	Creb3l2	cAMP responsive element binding protein 3-like 2
10188	NA	NA	NA	NA	369.667	0.00882164	NA	NA	52662	D18Ertd653e	DNA segment, Chr 18, ERATO Doi 653, expressed
14855	NA	NA	NA	NA	371.333	0.00892278	NA	NA	74466	4933427G17Rik	RIKEN cDNA 4933427G17 gene
431	2564	NA	5095.67	NA	371.667	0.00894686	NA	NA	105171	Arrdc3	arrestin domain containing 3
3985	NA	NA	NA	NA	373.333	0.00902392	NA	NA	17968	Ncam2	neural cell adhesion molecule 2
1787	NA	NA	NA	NA	375.667	0.00916198	NA	NA	12765	Il8rb	interleukin 8 receptor, beta
4260	3872	NA	NA	NA	376.667	0.00921015	2685.67	NA	18557	Pctk3	PCTAIRE-motif protein kinase 3
3621	NA	NA	NA	NA	380	0.00938995	NA	NA	170799	Rtkn2	rhotekin 2
2024	NA	NA	NA	NA	384	0.0095826	NA	NA	13143	Dapk2	death-associated protein kinase 2
5423	NA	NA	NA	NA	384	0.0095826	NA	NA	208718	Dis3l2	DIS3 mitotic control homolog (S. cerevisiae)-like 2
14737	NA	NA	NA	NA	385	0.00962915	NA	NA	74201	Cep97	centrosomal protein 97
8997	NA	NA	NA	NA	386	0.00969819	NA	NA	276919	Gemin4	gem (nuclear organelle) associated protein 4
16146	NA	NA	2784	NA	390	0.00988441	NA	NA	94040	Clmn	calmin
5960	NA	NA	NA	NA	391.667	0.00997752	NA	NA	216134	Pdxk	pyridoxal (pyridoxine, vitamin B6) kinase
7065	2394.33	NA	4922.67	NA	392.667	0.0100225	NA	NA	227753	Gsn	gelsolin
6232	3709.33	NA	3148.33	NA	398	0.0102633	NA	NA	21827	Thbs3	thrombospondin 3
12749	NA	NA	NA	NA	398.667	0.0103163	NA	NA	68162	A930003A15Rik	RIKEN cDNA A930003A15 gene
9901	NA	NA	NA	NA	399.333	0.0103612	NA	NA	432486	Gnptab	N-acetylglucosamine-1-phosphate transferase, alpha and beta subunits
5329	NA	NA	NA	NA	403.667	0.0106004	NA	NA	207781	5830404H04Rik	RIKEN cDNA 5830404H04 gene
2177	2321.33	NA	NA	NA	405	0.0106935	NA	NA	13612	Edil3	EGF-like repeats and discoidin I-like domains 3
2812	3037.67	NA	4652.33	NA	405.667	0.0107321	NA	NA	14854	Gss	glutathione synthetase
16013	NA	NA	NA	NA	405.667	0.0107321	NA	NA	83675	Bicc1	bicaudal C homolog 1 (Drosophila)
2249	3579.67	NA	NA	NA	409.333	0.0109311	2907.33	NA	13823	Epb4.1l3	erythrocyte protein band 4.1-like 3
1065	2313.33	NA	NA	NA	412	0.0110869	NA	NA	11504	Adamts1	a disintegrin-like and metallopeptidase (reprolysin type) with thrombospondin type 1 motif, 1
4435	2757	NA	5525.33	NA	413.667	0.0111896	NA	NA	18952	40425	septin 4
5129	3983.33	NA	3001	NA	420	0.0115733	NA	NA	20501	Slc16a1	solute carrier family 16 (monocarboxylic acid transporters), member 1
2933	NA	NA	NA	NA	423	0.0117049	NA	NA	15223	Foxj1	forkhead box J1
11522	4026.33	NA	2723.67	NA	425.667	0.0118623	NA	NA	66180	1110036O03Rik	RIKEN cDNA 1110036O03 gene
15664	2921.33	NA	NA	NA	426.333	0.0118912	NA	NA	77980	Sbf1	SET binding factor 1
11451	2973.33	NA	3827.67	NA	427.333	0.0119586	NA	NA	66066	Gng11	guanine nucleotide binding protein (G protein), gamma 11
7180	NA	NA	NA	NA	429.333	0.0120661	NA	NA	229474	Fhdc1	FH2 domain containing 1
8635	NA	NA	NA	NA	430.667	0.0121288	NA	NA	268512	Slc26a11	solute carrier family 26, member 11
10494	NA	NA	NA	NA	431	0.0121576	NA	NA	54670	Atp8b1	ATPase, class I, type 8B, member 1
9465	3272	NA	NA	NA	431.667	0.0122074	NA	NA	328330	D130037M23Rik	RIKEN cDNA D130037M23 gene
9093	NA	NA	NA	NA	433	0.0122781	NA	NA	286940	Flnb	filamin, beta
10378	2581	NA	4124.33	NA	434.333	0.0123551	NA	NA	54325	Elovl1	elongation of very long chain fatty acids (FEN1/Elo2, SUR4/Elo3, yeast)-like 1
11486	3550.67	NA	4550.33	NA	434.667	0.0123744	5239.67	NA	66124	Josd2	Josephin domain containing 2
14054	4163.33	NA	6170.33	NA	434.667	0.0123744	3465.67	NA	71946	Endod1	endonuclease domain containing 1
5533	3506.33	NA	3184.67	NA	439.667	0.012689	NA	NA	20973	Syngr2	synaptogyrin 2
5740	2650	NA	NA	NA	440	0.0127067	4030	NA	213469	Lgi3	leucine-rich repeat LGI family, member 3
15240	NA	NA	NA	NA	443.667	0.0130021	NA	NA	75914	Exoc6b	exocyst complex component 6B
12281	2046.33	NA	4784.67	NA	444.333	0.0130872	NA	NA	67330	1700047M11Rik	RIKEN cDNA 1700047M11 gene
3275	NA	NA	NA	NA	446	0.0132156	4123.67	NA	16480	Jup	junction plakoglobin
3480	NA	NA	NA	NA	447.333	0.0132943	NA	NA	16882	Lig3	ligase III, DNA, ATP-dependent
14428	NA	NA	NA	NA	447.667	0.0133135	NA	NA	73086	Rps6ka5	ribosomal protein S6 kinase, polypeptide 5
3483	NA	NA	NA	NA	448	0.0133456	NA	NA	16889	Lipa	lysosomal acid lipase A
13824	2720.67	NA	5338.33	NA	449.667	0.0134644	NA	NA	71330	Rcbtb1	regulator of chromosome condensation (RCC1) and BTB (POZ) domain containing protein 1
3901	2470	NA	NA	NA	458.333	0.0140456	NA	NA	17768	Mthfd2	methylenetetrahydrofolate dehydrogenase (NAD+ dependent), methenyltetrahydrofolate cyclohydrolase
5687	2323.33	NA	NA	NA	459.667	0.014121	NA	NA	212943	Fam46a	family with sequence similarity 46, member A
5957	4054.67	NA	6131.67	NA	461.667	0.0142623	3611	NA	216080	Ube2d1	ubiquitin-conjugating enzyme E2D 1, UBC4/5 homolog (yeast)
255	3809	NA	3521	NA	462.333	0.0143121	NA	NA	102103	Mtus1	mitochondrial tumor suppressor 1
10964	NA	NA	NA	NA	462.333	0.0143121	NA	NA	57394	Tmem27	transmembrane protein 27
6737	2837.67	NA	5240.33	NA	462.667	0.0143378	NA	NA	224794	Enpp4	ectonucleotide pyrophosphatase/phosphodiesterase 4
11166	2924.33	NA	4278.33	NA	464	0.0144469	NA	NA	59079	Erbb2ip	Erbb2 interacting protein
2700	3573.33	NA	3790	NA	467.667	0.0146845	NA	NA	14664	Slc6a9	solute carrier family 6 (neurotransmitter transporter, glycine), member 9
5842	2712.33	NA	4271.67	NA	471	0.01489	NA	NA	214345	Lrrc1	leucine rich repeat containing 1
12130	3733.33	NA	3296.67	NA	472	0.0149414	NA	NA	67075	Magt1	magnesium transporter 1
7114	2568.33	NA	NA	NA	472.667	0.0149751	3721.33	NA	228564	Frmd5	FERM domain containing 5
10163	3378.33	NA	3248	NA	473.667	0.0150409	NA	NA	52502	Carhsp1	calcium regulated heat stable protein 1
702	NA	NA	NA	NA	476.333	0.015224	NA	NA	108689	Obfc1	oligonucleotide/oligosaccharide-binding fold containing 1
9328	NA	NA	NA	NA	478.667	0.0153973	NA	NA	320244	Ttll5	tubulin tyrosine ligase-like family, member 5
633	1832.67	NA	NA	NA	479.333	0.0154423	NA	NA	107993	Bfsp2	beaded filament structural protein 2, phakinin
167	3227.33	NA	6345.33	NA	480.333	0.0155226	4120	NA	100561	Slc15a4	solute carrier family 15, member 4
1661	2115.33	NA	4749.67	NA	481	0.0155691	NA	NA	12521	Cd82	CD82 antigen
9628	1802	NA	NA	NA	481	0.0155691	NA	NA	338521	Fa2h	fatty acid 2-hydroxylase
14049	2746	NA	3961	NA	485.333	0.0158276	NA	NA	71929	Tmem123	transmembrane protein 123
878	NA	NA	NA	NA	489.333	0.0160812	NA	NA	110596	Rgnef	Rho-guanine nucleotide exchange factor
5471	NA	NA	NA	NA	490	0.0161166	NA	NA	209131	Snx30	sorting nexin family member 30
6627	4308.67	NA	5008.67	NA	491.667	0.0162193	4336.33	NA	223775	Pim3	proviral integration site 3
12288	2432.67	NA	4527.67	NA	495.667	0.0165179	NA	NA	67338	Rffl	ring finger and FYVE like domain containing protein
15818	NA	NA	NA	NA	496.333	0.0165484	NA	NA	78912	Sp2	Sp2 transcription factor
13826	NA	NA	NA	NA	500.333	0.0168727	NA	NA	71336	Rbks	ribokinase
7513	NA	NA	NA	NA	502	0.0170188	NA	NA	233011	Itpkc	inositol 1,4,5-trisphosphate 3-kinase C
10341	NA	NA	NA	NA	502.333	0.0170493	1912.67	NA	54132	Pdlim1	PDZ and LIM domain 1 (elfin)
2316	4016	NA	NA	NA	503	0.0170942	2187.67	NA	14038	Expi	extracellular proteinase inhibitor
12814	NA	NA	NA	NA	505.333	0.0172612	NA	NA	68294	Mfsd10	major facilitator superfamily domain containing 10
15856	2156.67	NA	NA	NA	505.333	0.0172612	NA	NA	80281	Cttnbp2nl	CTTNBP2 N-terminal like
12346	NA	NA	NA	NA	514	0.0178391	NA	NA	67448	Plxdc2	plexin domain containing 2
2188	NA	NA	NA	NA	514.667	0.0178857	NA	NA	13636	Efna1	ephrin A1
1807	3429	NA	NA	NA	515	0.0179098	3170.67	NA	12795	Plk3	polo-like kinase 3 (Drosophila)
8308	2861.67	NA	NA	NA	515	0.0179098	3606.33	NA	243937	Zfp536	zinc finger protein 536
15734	NA	NA	NA	NA	516.333	0.0180029	NA	NA	78449	2700046A07Rik	RIKEN cDNA 2700046A07 gene
10037	NA	NA	NA	NA	518	0.0180816	NA	NA	50780	Rgs3	regulator of G-protein signaling 3
10548	NA	NA	NA	NA	518.667	0.0181169	NA	NA	56013	RP23-157O10.7	P140 gene
8123	NA	NA	NA	NA	521	0.0182662	NA	NA	24087	Tll2	tolloid-like 2
2901	NA	NA	NA	NA	521.667	0.0183272	NA	NA	15166	Hcn2	hyperpolarization-activated, cyclic nucleotide-gated K+ 2
5222	4086.33	NA	5336.67	NA	523.333	0.0184636	4263	NA	20661	Sort1	sortilin 1
4546	NA	NA	4452.33	NA	523.667	0.0184845	NA	NA	19157	Cyth1	cytohesin 1
10293	NA	NA	NA	NA	527.667	0.0187671	NA	NA	53626	Insm1	insulinoma-associated 1
3706	1749.33	NA	NA	NA	529.333	0.0189035	NA	NA	17153	Mal	myelin and lymphocyte protein, T-cell differentiation protein
15825	2563	NA	NA	NA	529.333	0.0189035	NA	NA	78925	Srd5a1	steroid 5 alpha-reductase 1
2953	NA	NA	NA	NA	530	0.0189469	NA	NA	15275	Hk1	hexokinase 1
4292	NA	NA	NA	NA	539.333	0.0196292	NA	NA	18605	Enpp1	ectonucleotide pyrophosphatase/phosphodiesterase 1
701	3676	NA	NA	NA	542.333	0.01987	NA	NA	108687	Edem2	ER degradation enhancer, mannosidase alpha-like 2
15550	3909	NA	2608	NA	542.667	0.0199021	NA	NA	77125	Il33	interleukin 33
13021	NA	NA	6591.33	NA	543.333	0.0199583	NA	NA	68875	Tmcc2	transmembrane and coiled-coil domains 2
6252	2190	NA	6422	NA	546	0.0201445	NA	NA	218442	Serinc5	serine incorporator 5
7839	NA	NA	NA	NA	549.333	0.020403	2356	NA	23790	Coro1c	coronin, actin binding protein 1C
4094	3504.33	NA	3557.67	NA	554	0.020769	NA	NA	18145	Npc1	Niemann Pick type C1
1667	3677	NA	2711	NA	555.333	0.0208493	NA	NA	12527	Cd9	CD9 antigen
10798	2130.33	NA	NA	NA	555.667	0.0208685	NA	NA	56542	Ick	intestinal cell kinase
10626	NA	NA	NA	NA	556.333	0.0209311	NA	NA	56229	Thsd1	thrombospondin, type I, domain 1
8353	3146	NA	6619	NA	557	0.0209986	3888	NA	244745	Dpy19l1	dpy-19-like 1 (C. elegans)
10388	2972.33	NA	NA	NA	559.333	0.0211848	NA	NA	54366	Ctnnal1	catenin (cadherin associated protein), alpha-like 1
3743	1918.67	NA	NA	NA	564	0.0215107	NA	NA	17196	Mbp	myelin basic protein
13895	NA	NA	NA	NA	565.333	0.0216102	NA	NA	71653	4930506M07Rik	RIKEN cDNA 4930506M07 gene
6461	NA	NA	NA	NA	566.667	0.0217081	2752	NA	22153	Tubb4	tubulin, beta 4
1350	3533	NA	5232.67	NA	567.667	0.0217691	NA	NA	11933	Atp1b3	ATPase, Na+/K+ transporting, beta 3 polypeptide
5763	NA	NA	NA	NA	572.667	0.0221512	NA	NA	21366	Slc6a6	solute carrier family 6 (neurotransmitter transporter, taurine), member 6
5068	NA	NA	NA	NA	573.333	0.0221833	NA	NA	20403	Itsn2	intersectin 2
7584	NA	NA	NA	NA	573.333	0.0221833	2219	NA	233878	Sez6l2	seizure related 6 homolog like 2
12413	NA	NA	NA	NA	574	0.0222411	2244.67	NA	67557	Larp6	La ribonucleoprotein domain family, member 6
9676	NA	NA	NA	NA	574.333	0.0222684	NA	NA	380718	Mks1	Meckel syndrome, type 1
2507	NA	NA	2679.67	NA	574.667	0.0223021	NA	NA	14269	Fnbp1	formin binding protein 1
6045	3552.67	NA	4244.67	NA	574.667	0.0223021	NA	NA	216853	Wdr79	WD repeat domain 79
8980	NA	NA	NA	NA	576.333	0.0224274	NA	NA	27419	Naglu	alpha-N-acetylglucosaminidase (Sanfilippo disease IIIB)
2107	NA	NA	NA	NA	578	0.0225558	NA	NA	13430	Dnm2	dynamin 2
10420	NA	NA	NA	NA	578.667	0.0225991	NA	NA	54445	Unc93b1	unc-93 homolog B1 (C. elegans)
10587	2652	NA	NA	NA	579	0.0226216	NA	NA	56173	Cldn14	claudin 14
9387	2283.33	NA	NA	NA	583.667	0.0229491	NA	NA	320706	9830001H06Rik	RIKEN cDNA 9830001H06 gene
6961	NA	NA	NA	NA	585.333	0.0230599	NA	NA	22695	Zfp36	zinc finger protein 36
8051	NA	NA	NA	NA	591	0.0235608	NA	NA	240087	Mdc1	mediator of DNA damage checkpoint 1
4416	1917	NA	6077	NA	592.333	0.0236924	NA	NA	18823	Plp1	proteolipid protein (myelin) 1
13900	NA	NA	3280.33	NA	595.333	0.0239188	3665	NA	71670	Acy3	aspartoacylase (aminoacylase) 3
822	2703	NA	NA	NA	596	0.0239701	3819.67	NA	109901	Ela1	elastase 1, pancreatic
15365	NA	NA	NA	NA	597	0.0240649	NA	NA	76484	Kndc1	kinase non-catalytic C-lobe domain (KIND) containing 1
8174	2161.33	NA	NA	NA	598.333	0.0241612	NA	NA	241576	Ldlrad3	low density lipoprotein receptor class A domain containing 3
1841	NA	NA	NA	NA	599.667	0.0242575	NA	NA	12835	Col6a3	collagen, type VI, alpha 3
1370	NA	NA	6650.67	NA	601.667	0.0243988	NA	NA	11980	Atp8a1	ATPase, aminophospholipid transporter (APLT), class I, type 8A, member 1
3661	NA	NA	NA	NA	603	0.0245208	NA	NA	17120	Mad1l1	mitotic arrest deficient 1-like 1
14405	NA	NA	NA	NA	603	0.0245208	2271	NA	72948	Tppp	tubulin polymerization promoting protein
8858	3043	NA	4112.67	NA	609.333	0.0250361	NA	NA	27060	Tcirg1	T-cell, immune regulator 1, ATPase, H+ transporting, lysosomal V0 protein A3
9297	NA	NA	NA	NA	609.667	0.0250714	NA	NA	320078	Olfml2b	olfactomedin-like 2B
2449	3557.67	NA	2926.33	NA	610	0.0250939	NA	NA	14183	Fgfr2	fibroblast growth factor receptor 2
4350	4297	NA	4758.33	NA	610	0.0250939	NA	NA	18718	Pip4k2a	phosphatidylinositol-5-phosphate 4-kinase, type II, alpha
11170	3164.67	NA	4684.33	NA	614	0.0254375	5340	NA	59092	Pcbp4	poly(rC) binding protein 4
11823	2358.33	NA	NA	NA	614.333	0.0254583	NA	NA	66634	Mcm8	minichromosome maintenance deficient 8 (S. cerevisiae)
5116	NA	NA	NA	NA	615	0.0255049	NA	NA	20480	Clpb	ClpB caseinolytic peptidase B homolog (E. coli)
13318	3565	NA	2984.33	NA	615	0.0255049	NA	NA	69660	Tmbim1	transmembrane BAX inhibitor motif containing 1
6618	3920.33	NA	4125.33	NA	615.333	0.0255338	NA	NA	223739	5031439G07Rik	RIKEN cDNA 5031439G07 gene
561	3403.67	NA	NA	NA	617	0.025659	NA	NA	107239	Atpgd1	ATP-grasp domain containing 1
6180	3947	NA	5933	NA	618	0.0257521	3861	NA	217837	Itpk1	inositol 1,3,4-triphosphate 5/6 kinase
1873	2281.67	NA	NA	NA	622	0.0260604	NA	NA	12892	Cpox	coproporphyrinogen oxidase
3151	NA	NA	NA	NA	623	0.0261567	NA	NA	16161	Il12rb1	interleukin 12 receptor, beta 1
9899	3684.33	NA	6700.33	NA	623	0.0261567	3319.33	NA	432450	Nkain2	Na+/K+ transporting ATPase interacting 2
4482	NA	NA	NA	NA	623.667	0.0262065	NA	NA	19051	Gsbs	G substrate
11579	3647.67	NA	NA	NA	624.667	0.0262915	3003.67	NA	66270	Fam134b	family with sequence similarity 134, member B
3958	3711.67	NA	2807	NA	625.667	0.0263654	NA	NA	17920	Myo6	myosin VI
14338	2452	NA	NA	NA	626	0.0263943	NA	NA	72672	Zfp518	zinc finger protein 518
9260	NA	NA	NA	NA	627	0.0265083	NA	NA	319767	Atp10b	ATPase, class V, type 10B
9584	2219	NA	NA	NA	629	0.0266624	NA	NA	331004	Slc9a9	solute carrier family 9 (sodium/hydrogen exchanger), member 9
14665	3045.67	NA	NA	NA	632.667	0.0270059	NA	NA	74094	Tjap1	tight junction associated protein 1
672	3287	NA	NA	NA	633	0.0270364	NA	NA	108116	Slco3a1	solute carrier organic anion transporter family, member 3a1
16287	NA	NA	NA	NA	634.667	0.0271954	NA	NA	98999	Znfx1	zinc finger, NFX1-type containing 1
395	2076.67	NA	4511	NA	636	0.027327	NA	NA	104445	Cdc42ep1	CDC42 effector protein (Rho GTPase binding) 1
13363	NA	NA	NA	NA	636.667	0.0273816	NA	NA	69748	Aldh16a1	aldehyde dehydrogenase 16 family, member A1
15472	NA	NA	NA	NA	636.667	0.0273816	NA	NA	76857	Spopl	speckle-type POZ protein-like
6863	3700.33	NA	4762	NA	637	0.0274073	NA	NA	226154	Lzts2	leucine zipper, putative tumor suppressor 2
8567	NA	NA	NA	NA	638.333	0.0275421	NA	NA	26433	Plod3	procollagen-lysine, 2-oxoglutarate 5-dioxygenase 3
12566	NA	NA	NA	NA	639.667	0.0276401	NA	NA	67841	Atg3	autophagy-related 3 (yeast)
11117	NA	NA	NA	NA	640	0.0276642	NA	NA	58996	4933428G20Rik	RIKEN cDNA 4933428G20 gene
6272	1850	NA	NA	NA	640.333	0.0277075	NA	NA	218581	Depdc1b	DEP domain containing 1B
138	NA	NA	NA	NA	641.667	0.0278086	NA	NA	100088	Rcc1	regulator of chromosome condensation 1
6686	NA	NA	NA	NA	643	0.0279258	NA	NA	22415	Wnt3	wingless-related MMTV integration site 3
9071	NA	NA	NA	NA	643	0.0279258	NA	NA	28105	Trim36	tripartite motif-containing 36
9770	NA	NA	NA	NA	647	0.028271	NA	NA	381845	2310014L17Rik	RIKEN cDNA 2310014L17 gene
6850	2859.67	NA	5744.33	NA	648	0.0283497	4800	NA	226090	Ermp1	endoplasmic reticulum metallopeptidase 1
3030	NA	NA	NA	NA	649.333	0.0284861	2574	NA	15476	Hs3st1	heparan sulfate (glucosamine) 3-O-sulfotransferase 1
10076	2157.67	NA	NA	NA	655.333	0.0290448	NA	NA	50915	Grb14	growth factor receptor bound protein 14
16322	NA	NA	NA	NA	655.667	0.0290753	NA	NA	99683	Sec24b	Sec24 related gene family, member B (S. cerevisiae)
4513	NA	NA	NA	NA	656.667	0.0291588	2432.67	NA	19099	Mapk8ip1	mitogen-activated protein kinase 8 interacting protein 1
5176	NA	NA	NA	NA	657.333	0.0292085	NA	NA	20568	Slpi	secretory leukocyte peptidase inhibitor
7248	NA	NA	NA	NA	659.333	0.0293916	3239	NA	230126	Shb	src homology 2 domain-containing transforming protein B
4659	NA	NA	NA	NA	660.667	0.0295553	NA	NA	192652	Wdr81	WD repeat domain 81
3277	NA	NA	NA	NA	661	0.0295858	NA	NA	16485	Kcna1	potassium voltage-gated channel, shaker-related subfamily, member 1
1169	3240.33	NA	6168	NA	663.333	0.0298154	4221.67	NA	116871	Mta3	metastasis associated 3
5359	3795	NA	NA	NA	663.333	0.0298154	2748.33	NA	208158	Map6d1	MAP6 domain containing 1
14000	NA	NA	NA	NA	664	0.0298828	NA	NA	71849
12851	2346.33	NA	5077	NA	664.333	0.0299213	NA	NA	68420	Ankrd13a	ankyrin repeat domain 13a
5660	NA	NA	NA	NA	664.667	0.0299486	NA	NA	212439	AA986860	expressed sequence AA986860
13676	NA	NA	NA	NA	664.667	0.0299486	NA	NA	70807	Arrdc2	arrestin domain containing 2
5469	3434.67	NA	3145.33	NA	666.333	0.0301044	NA	NA	20912	Stxbp3a	syntaxin binding protein 3A
12016	NA	NA	NA	NA	667.333	0.030191	NA	NA	66904	Pccb	propionyl Coenzyme A carboxylase, beta polypeptide
2952	NA	NA	NA	NA	668.333	0.0302858	NA	NA	15273	Hivep2	human immunodeficiency virus type I enhancer binding protein 2
13366	2815.67	NA	4892	NA	668.333	0.0302858	5384.33	NA	69754	Fbxo7	F-box protein 7
10107	NA	NA	NA	NA	669.667	0.0303917	NA	NA	51869	Rif1	Rap1 interacting factor 1 homolog (yeast)
3682	2736.33	NA	6043	NA	670	0.0304142	NA	NA	17131	Smad7	MAD homolog 7 (Drosophila)
12353	2211.67	NA	4632	NA	670	0.0304142	NA	NA	67457	Frmd8	FERM domain containing 8
4390	1874	NA	NA	NA	670.667	0.030472	NA	NA	18783	Pla2g4a	phospholipase A2, group IVA (cytosolic, calcium-dependent)
7570	NA	NA	NA	NA	671	0.0305025	2243	NA	233806	Tmem159	transmembrane protein 159
10835	NA	NA	NA	NA	675.333	0.0309295	NA	NA	56709	Dnajb12	DnaJ (Hsp40) homolog, subfamily B, member 12
204	5216	NA	3334.67	NA	678	0.0311719	4675	NA	101240	Wdr91	WD repeat domain 91
424	3137	NA	4358.33	NA	689	0.0323198	5490.33	NA	104923	Adi1	acireductone dioxygenase 1
9960	NA	NA	NA	NA	690.667	0.0324723	NA	NA	434249	EG434249	predicted gene, EG434249
4665	NA	NA	6507	NA	692.333	0.0326553	NA	NA	19266	Ptprd	protein tyrosine phosphatase, receptor type, D
4587	2932.67	NA	6672	NA	693.333	0.0327404	3920.67	NA	192159	Prpf8	pre-mRNA processing factor 8
5961	3647	NA	4629.33	NA	693.333	0.0327404	5076	NA	216136	Ilvbl	ilvB (bacterial acetolactate synthase)-like
398	2228.33	NA	NA	NA	696.667	0.0330101	NA	NA	104479	Ccdc117	coiled-coil domain containing 117
7210	3696.33	NA	5542	NA	698.333	0.0331594	4375	NA	229681	St7l	suppression of tumorigenicity 7-like
14886	NA	NA	NA	NA	699.333	0.0332557	NA	NA	74549	9130404D08Rik	RIKEN cDNA 9130404D08 gene
10320	1970.67	NA	NA	NA	700.667	0.0333777	NA	NA	53897	Gal3st1	galactose-3-O-sulfotransferase 1
14756	2428	NA	5478	NA	703.333	0.0336442	5173	NA	74244	Atg7	autophagy-related 7 (yeast)
212	2589.67	NA	6503	NA	709.333	0.0341933	4271.67	NA	101476	Plekha1	pleckstrin homology domain containing, family A (phosphoinositide binding specific) member 1
2389	NA	NA	NA	NA	709.667	0.0342318	NA	NA	14088	Fancc	Fanconi anemia, complementation group C
1056	2293.33	NA	NA	NA	712.333	0.0345128	NA	NA	11491	Adam17	a disintegrin and metallopeptidase domain 17
7117	3945	NA	2948.67	NA	713.667	0.0346781	NA	NA	228602	4930402H24Rik	RIKEN cDNA 4930402H24 gene
16100	NA	NA	NA	NA	714.667	0.0347793	NA	NA	93742	Pard3	par-3 (partitioning defective 3) homolog (C. elegans)
12796	3663.33	NA	NA	NA	717.333	0.0350217	2809.33	NA	68262	Agpat4	1-acylglycerol-3-phosphate O-acyltransferase 4 (lysophosphatidic acid acyltransferase, delta)
13838	NA	NA	NA	NA	720	0.0352561	NA	NA	71375	Foxn3	forkhead box N3
8992	NA	NA	NA	NA	721.333	0.0353845	NA	NA	276829	Smtnl2	smoothelin-like 2
14035	NA	NA	NA	NA	722.667	0.0354937	NA	NA	71909	2310022K01Rik	RIKEN cDNA 2310022K01 gene
12670	NA	NA	NA	NA	724	0.0356269	NA	NA	67998	Fam134c	family with sequence similarity 134, member C
6556	4412.33	NA	2836.67	NA	725.667	0.0358485	NA	NA	22330	Vcl	vinculin
2597	4009	NA	2289.67	NA	727	0.0359817	NA	NA	14431	Gamt	guanidinoacetate methyltransferase
10682	2449.67	NA	NA	NA	728	0.0360652	3644.33	NA	56363	Tmeff2	transmembrane protein with EGF-like and two follistatin-like domains 2
5636	2740.33	NA	4486	NA	728.667	0.0361454	NA	NA	211978	Zfyve26	zinc finger, FYVE domain containing 26
4109	NA	NA	NA	NA	731.667	0.0364328	NA	NA	18174	Slc11a2	solute carrier family 11 (proton-coupled divalent metal ion transporters), member 2
8539	2785.67	NA	NA	NA	733.667	0.0366174	NA	NA	26403	Map3k11	mitogen-activated protein kinase kinase kinase 11
11154	3804.67	NA	3337.33	NA	734	0.0366511	5557.33	NA	59044	Rnf130	ring finger protein 130
4415	3566.67	NA	3154.67	NA	735.333	0.0367972	NA	NA	18822	Plod1	procollagen-lysine, 2-oxoglutarate 5-dioxygenase 1
6336	3552.33	NA	6682.67	NA	739	0.0371601	3428.67	NA	21916	Tmod1	tropomodulin 1
6227	2444.33	NA	5599	NA	741.667	0.0374057	NA	NA	218232	Ptpdc1	protein tyrosine phosphatase domain containing 1
14395	NA	NA	NA	NA	742.333	0.0374747	NA	NA	72902	Spock3	sparc/osteonectin, cwcv and kazal-like domains proteoglycan 3
180	4167.67	NA	4981	NA	743	0.0375309	4417.67	NA	100756	Usp30	ubiquitin specific peptidase 30
14372	NA	NA	NA	NA	743.333	0.0375598	NA	NA	72787	Tmem48	transmembrane protein 48
13592	NA	NA	NA	NA	744.667	0.0376866	3090.33	NA	70527	Stambp	Stam binding protein
16255	2499	NA	6161.33	NA	745.333	0.0377557	NA	NA	98386	Lbr	lamin B receptor
6533	NA	NA	4173	NA	754.333	0.0386402	NA	NA	22289	Utx	ubiquitously transcribed tetratricopeptide repeat gene, X chromosome
7718	3279	NA	3187	NA	759.667	0.0391572	NA	NA	235406	Snx33	sorting nexin 33
12526	3007.67	NA	6533.67	NA	759.667	0.0391572	NA	NA	67760	Slc38a2	solute carrier family 38, member 2
14212	2272.33	NA	4280.67	NA	760.333	0.0392358	NA	NA	72287	Plekhf1	pleckstrin homology domain containing, family F (with FYVE domain) member 1
5900	NA	NA	NA	NA	761.333	0.0393514	NA	NA	215113	Slc43a2	solute carrier family 43, member 2
12872	3465.33	NA	3141	NA	765.333	0.0397945	NA	NA	68480	1110007C09Rik	RIKEN cDNA 1110007C09 gene
16296	NA	NA	NA	NA	767.667	0.0399936	NA	NA	99151	Cercam	cerebral endothelial cell adhesion molecule
2340	NA	NA	NA	NA	771	0.0403869	3276.67	NA	14055	Ezh1	enhancer of zeste homolog 1 (Drosophila)
9883	NA	NA	NA	NA	771.333	0.0404447	NA	NA	407823	Baz2b	bromodomain adjacent to zinc finger domain, 2B
11141	3261.67	NA	5044.67	NA	772	0.0405314	5031.33	NA	59027	Nampt	nicotinamide phosphoribosyltransferase
7661	NA	NA	NA	NA	775.333	0.0409376	NA	NA	234728	Ftsjd1	FtsJ methyltransferase domain containing 1
9305	NA	NA	NA	NA	777.333	0.0411655	2342.67	NA	320127	Dgki	diacylglycerol kinase, iota
2384	4902	NA	2593.33	NA	778	0.0412249	NA	NA	14085	Fah	fumarylacetoacetate hydrolase
9403	2652.67	NA	NA	NA	780.333	0.0414609	NA	NA	320795	Pkn1	protein kinase N1
1377	NA	NA	NA	NA	782	0.0416712	NA	NA	11990	Atrn	attractin
12182	2932.67	NA	NA	NA	787	0.042217	NA	NA	67158	Sft2d3	SFT2 domain containing 3
4020	3651	NA	3234.67	NA	787.333	0.0422556	NA	NA	18021	Nfatc3	nuclear factor of activated T-cells, cytoplasmic, calcineurin-dependent 3
1673	3347.67	NA	NA	NA	788	0.0423375	4399	NA	12539	Cdc37	cell division cycle 37 homolog (S. cerevisiae)
11503	NA	NA	2786.33	NA	791	0.0426794	NA	NA	66153	Fbxo36	F-box protein 36
5440	3245.33	NA	6383	NA	795	0.0431016	3987.33	NA	208884	Zdhhc9	zinc finger, DHHC domain containing 9
768	3516.67	NA	4941.33	NA	798.333	0.0434853	4919	NA	109232	Sccpdh	saccharopine dehydrogenase (putative)
15767	2176.33	NA	NA	NA	798.333	0.0434853	NA	NA	78697	Pus7	pseudouridylate synthase 7 homolog (S. cerevisiae)
9065	4292	NA	5190.67	NA	800.667	0.043755	4121.33	NA	28075	Fam152b	family with sequence similarity 152, member B
8181	NA	NA	NA	NA	802.667	0.0439509	2044.33	NA	241656	Pak7	p21 (CDKN1A)-activated kinase 7
4924	4078	NA	6460.67	NA	803.333	0.0440247	3123.33	NA	20166	Rtkn	rhotekin
6434	NA	NA	NA	NA	806.667	0.0443442	NA	NA	22084	Tsc2	tuberous sclerosis 2
2031	NA	NA	NA	NA	811.667	0.0448932	NA	NA	13168	Dbil5	diazepam binding inhibitor-like 5
5062	2319.33	NA	NA	NA	815	0.0453155	NA	NA	20393	Sgk1	serum/glucocorticoid regulated kinase 1
13562	3776.67	NA	2612	NA	815.333	0.0453492	NA	NA	70423	Tspan15	tetraspanin 15
4257	3498.67	NA	3000.67	NA	818	0.0456494	NA	NA	18553	Pcsk6	proprotein convertase subtilisin/kexin type 6
1704	3238	NA	NA	NA	822	0.0460652	3178.67	NA	12585	Cdr2	cerebellar degeneration-related 2
539	3656.67	NA	NA	NA	822.333	0.0461005	3039.67	NA	106877	Afap1l1	actin filament associated protein 1-like 1
14907	NA	NA	NA	NA	822.333	0.0461005	NA	NA	74626	Tmem81	transmembrane protein 81
4293	2362	NA	6765.33	NA	823.667	0.0462578	4016.33	NA	18606	Enpp2	ectonucleotide pyrophosphatase/phosphodiesterase 2
5322	2660.33	NA	NA	NA	825	0.0464184	4573	NA	20773	Sptlc2	serine palmitoyltransferase, long chain base subunit 2
1514	2806.33	NA	4114	NA	827	0.0466367	NA	NA	12305	Ddr1	discoidin domain receptor family, member 1
5156	NA	NA	NA	NA	827.333	0.0466736	NA	NA	20530	Slc31a2	solute carrier family 31, member 2
9873	5337.67	NA	3915.33	NA	827.667	0.0467009	4062.33	NA	407243	Tmem189	transmembrane protein 189
15351	NA	NA	2062.33	NA	829.667	0.0468968	NA	NA	76441	Daam2	dishevelled associated activator of morphogenesis 2
13441	2087	NA	NA	NA	831.333	0.0470653	NA	NA	69993	Chn2	chimerin (chimaerin) 2
721	3478.67	NA	3158.67	NA	832	0.0471328	NA	NA	108897	Aif1l	allograft inflammatory factor 1-like
10321	NA	NA	4562	NA	835.333	0.0474892	3238	NA	53901	Rcan2	regulator of calcineurin 2
5332	4334.33	NA	3525.33	NA	836.667	0.0476112	NA	NA	207792	BC034090	cDNA sequence BC034090
11828	NA	NA	NA	NA	840.333	0.0480494	2631	NA	66647	Ndnl2	necdin-like 2
3074	NA	NA	NA	NA	843	0.0483175	NA	NA	15571	Elavl3	ELAV (embryonic lethal, abnormal vision, Drosophila)-like 3 (Hu antigen C)
15643	NA	NA	NA	NA	843.333	0.0483545	NA	NA	77864	Ypel2	yippee-like 2 (Drosophila)
7739	NA	NA	NA	NA	844.667	0.0484925	NA	NA	235584	Dusp7	dual specificity phosphatase 7
12127	3352.67	NA	4369	NA	850	0.0491026	5362.67	NA	67072	Cdc37l1	cell division cycle 37 homolog (S. cerevisiae)-like 1
15910	NA	NA	6679	NA	850.333	0.0491395	NA	NA	80890	Trim2	tripartite motif-containing 2
6596	3631.33	NA	5700.67	NA	852.333	0.0493707	NA	NA	223649	Nrbp2	nuclear receptor binding protein 2
10884	4018	NA	4441	NA	854.333	0.0495858	NA	NA	56812	Dnajb2	DnaJ (Hsp40) homolog, subfamily B, member 2
13643	2262	NA	4984.33	NA	854.667	0.0496179	NA	NA	70686	Dusp16	dual specificity phosphatase 16
5611	2835	NA	5778.33	NA	856.667	0.0497993	4737	NA	211488	Ado	2-aminoethanethiol (cysteamine) dioxygenase

## Sheet: Neuron - Table 1
Row	OPC_SI	OPC_pSI	Astrocyte_SI	Astrocyte_pSI	Oligodendroctye_SI	Oligodendrocyte_pSI	Neuron_SI	Neuron_pSI	Entrez	Symbol	Name
5100	NA	NA	NA	NA	NA	NA	5	3.58038e-06	20454	St3gal5	ST3 beta-galactoside alpha-2,3-sialyltransferase 5
8898	NA	NA	NA	NA	NA	NA	23.6667	4.29646e-05	27220	Cartpt	CART prepropeptide
13197	NA	NA	NA	NA	NA	NA	38	8.95095e-05	69315	1700001L19Rik	RIKEN cDNA 1700001L19 gene
10014	NA	NA	NA	NA	NA	NA	40.3333	0.000100251	50722	Dkkl1	dickkopf-like 1
5729	NA	NA	NA	NA	NA	NA	42	0.000128894	213409	Lemd1	LEM domain containing 1
6344	NA	NA	NA	NA	NA	NA	45	0.000139635	21924	Tnnc1	troponin C, cardiac/slow skeletal
14892	NA	NA	NA	NA	NA	NA	53.3333	0.000202291	74563	Rasgef1c	RasGEF domain family, member 1C
7456	NA	NA	NA	NA	NA	NA	54.3333	0.000220193	232400	BC048546	cDNA sequence BC048546
8632	NA	NA	NA	NA	NA	NA	54.3333	0.000220193	268482	Krt12	keratin 12
3547	NA	NA	NA	NA	NA	NA	58.6667	0.000230934	17060	Blnk	B-cell linker
8169	NA	NA	NA	NA	NA	NA	64.6667	0.000268528	241494	Zfp385b	zinc finger protein 385B
12320	NA	NA	NA	NA	NA	NA	76	0.000363409	67405	Nts	neurotensin
462	NA	NA	NA	NA	NA	NA	76.3333	0.000366989	105653	Phyhip	phytanoyl-CoA hydroxylase interacting protein
2373	NA	NA	NA	NA	NA	NA	77.6667	0.000384891	140781	Myh7	myosin, heavy polypeptide 7, cardiac muscle, beta
9822	NA	NA	NA	NA	NA	NA	85.6667	0.000483351	383787	Gm1337	gene model 1337, (NCBI)
10579	NA	NA	NA	NA	NA	NA	89.6667	0.000510204	56089	Ramp3	receptor (calcitonin) activity modifying protein 3
7989	NA	NA	NA	NA	NA	NA	94	0.000533477	23956	Neu2	neuraminidase 2
119	NA	NA	NA	NA	NA	NA	97	0.000553169	100043375	OTTMUSG00000015348	predicted gene, OTTMUSG00000015348
8241	NA	NA	NA	NA	NA	NA	101	0.000601504	242773	Slc45a1	solute carrier family 45, member 1
10368	NA	NA	NA	NA	NA	NA	102.667	0.000608665	54200	Sult2b1	sulfotransferase family, cytosolic, 2B, member 1
13015	NA	NA	NA	NA	NA	NA	107	0.00066237	68854	Asb11	ankyrin repeat and SOCS box-containing 11
10269	NA	NA	NA	NA	NA	NA	109.667	0.000691013	53420	Syt5	synaptotagmin V
8382	NA	NA	NA	NA	NA	NA	110.667	0.000701754	245469	Pdzd4	PDZ domain containing 4
15165	NA	NA	NA	NA	NA	NA	113.667	0.000730397	75668	Rasl10a	RAS-like, family 10, member A
1585	NA	NA	NA	NA	NA	NA	116.667	0.000767991	12404	Cbln1	cerebellin 1 precursor protein
9007	NA	NA	NA	NA	NA	NA	119.667	0.000805585	277414	Trp53i11	transformation related protein 53 inducible protein 11
1697	NA	NA	NA	NA	NA	NA	121	0.000818117	12575	Cdkn1a	cyclin-dependent kinase inhibitor 1A (P21)
6568	NA	NA	NA	NA	NA	NA	123	0.00084497	223433	Fam105a	family with sequence similarity 105, member A
5540	NA	NA	NA	NA	NA	NA	123.667	0.000855711	20979	Syt1	synaptotagmin I
10299	NA	NA	NA	NA	NA	NA	124.333	0.000870032	53857	Tuba8	tubulin, alpha 8
11089	NA	NA	NA	NA	NA	NA	126.667	0.000886144	58522	Trim54	tripartite motif-containing 54
2391	NA	NA	NA	NA	NA	NA	127.333	0.000893305	14089	Fap	fibroblast activation protein
12092	NA	NA	NA	NA	NA	NA	127.333	0.000893305	67020	Tmem88	transmembrane protein 88
5191	NA	NA	NA	NA	NA	NA	129	0.000930899	20604	Sst	somatostatin
1070	NA	NA	NA	NA	NA	NA	129.333	0.000936269	11516	Adcyap1	adenylate cyclase activating polypeptide 1
3131	NA	NA	NA	NA	NA	NA	131.667	0.000981024	16012	Igfbp6	insulin-like growth factor binding protein 6
4842	NA	NA	NA	NA	NA	NA	132	0.000991765	19711	Resp18	regulated endocrine-specific protein 18
12046	NA	NA	NA	NA	NA	NA	132.667	0.00100967	66952	2310030G06Rik	RIKEN cDNA 2310030G06 gene
6798	NA	NA	NA	NA	NA	NA	133.333	0.00101504	225642	Grp	gastrin releasing peptide
9475	NA	NA	NA	NA	NA	NA	137	0.00107053	328778	Rab26	RAB26, member RAS oncogene family
14573	NA	NA	NA	NA	NA	NA	138	0.00108127	73720	Cst6	cystatin E/M
10395	NA	NA	NA	NA	NA	NA	140.667	0.00110813	54376	Cacng3	calcium channel, voltage-dependent, gamma subunit 3
4954	NA	NA	NA	NA	NA	NA	142	0.00112782	20215	Sag	retinal S-antigen
6088	NA	NA	NA	NA	NA	NA	143	0.00115646	217154	Stac2	SH3 and cysteine rich domain 2
10988	NA	NA	NA	NA	NA	NA	144.667	0.00119406	57740	Stk32c	serine/threonine kinase 32C
11341	NA	NA	NA	NA	NA	NA	145.333	0.00120838	64337	Gng13	guanine nucleotide binding protein (G protein), gamma 13
1858	NA	NA	NA	NA	NA	NA	147.333	0.00125134	12862	Cox6a2	cytochrome c oxidase, subunit VI a, polypeptide 2
7240	NA	NA	NA	NA	NA	NA	149.667	0.00131042	230085	N28178	expressed sequence N28178
80	NA	NA	NA	NA	NA	NA	151.333	0.0013498	100042132	OTTMUSG00000006514	predicted gene, OTTMUSG00000006514
3134	NA	NA	NA	NA	NA	NA	154.667	0.00141783	16019	Igh-6	immunoglobulin heavy chain 6 (heavy chain of IgM)
2233	NA	NA	NA	NA	NA	NA	159.667	0.00151271	13796	Emx1	empty spiracles homolog 1 (Drosophila)
1549	NA	NA	NA	NA	NA	NA	163.333	0.00160043	12351	Car4	carbonic anhydrase 4
13564	NA	NA	NA	NA	NA	NA	167	0.0016792	70426	Tekt5	tektin 5
6376	NA	NA	NA	NA	NA	NA	168	0.00169531	21956	Tnnt2	troponin T2, cardiac
666	NA	NA	NA	NA	NA	NA	169.667	0.00174006	108100	Baiap2	brain-specific angiogenesis inhibitor 1-associated protein 2
15283	NA	NA	NA	NA	NA	NA	170	0.00174902	76183	Brunol6	bruno-like 6, RNA binding protein (Drosophila)
9122	NA	NA	NA	NA	NA	NA	173	0.00181883	29867	Cabp1	calcium binding protein 1
14337	NA	NA	NA	NA	NA	NA	177.333	0.00191013	72669	2810032G03Rik	RIKEN cDNA 2810032G03 gene
8021	NA	NA	NA	NA	NA	NA	178.333	0.00193161	23985	Slc26a4	solute carrier family 26, member 4
283	NA	NA	NA	NA	NA	NA	181.333	0.00201575	102614	Rpp25	ribonuclease P 25 subunit (human)
3013	NA	NA	NA	NA	NA	NA	181.667	0.0020247	15444	Hpca	hippocalcin
14570	NA	NA	NA	NA	NA	NA	184	0.00206409	73712	Dmkn	dermokine
14179	NA	NA	NA	NA	NA	NA	189.667	0.002227	72179	Fbxl2	F-box and leucine-rich repeat protein 2
1422	NA	NA	NA	NA	NA	NA	191.333	0.00226996	12064	Bdnf	brain derived neurotrophic factor
4989	NA	NA	NA	NA	NA	NA	191.667	0.0022807	20289	Scx	scleraxis
9310	NA	NA	NA	NA	NA	NA	192	0.00229681	320158	Zmat4	zinc finger, matrin type 4
12542	NA	NA	NA	NA	NA	NA	192.333	0.00230755	67792	Rgs8	regulator of G-protein signaling 8
15381	NA	NA	NA	NA	NA	NA	193.667	0.00233978	76527	Il34	interleukin 34
7400	NA	NA	NA	NA	NA	NA	196.667	0.00243108	231807	BC037034	cDNA sequence BC037034
9353	NA	NA	NA	NA	NA	NA	199.333	0.00251522	320460	A830006F12Rik	RIKEN cDNA A830006F12 gene
12942	NA	NA	NA	NA	NA	NA	200.667	0.00255102	68666	Svop	SV2 related protein
11290	NA	NA	NA	NA	NA	NA	201	0.00256176	63872	Zfp296	zinc finger protein 296
16112	NA	NA	NA	NA	NA	NA	206.667	0.00274078	93835	Amn	amnionless
1806	NA	NA	NA	NA	NA	NA	208.667	0.00281239	12794	Cnih2	cornichon homolog 2 (Drosophila)
5911	NA	NA	NA	NA	NA	NA	211.333	0.00290906	215303	Camk1g	calcium/calmodulin-dependent protein kinase I gamma
16021	NA	NA	NA	NA	NA	NA	212.333	0.00294844	83766	Actl6b	actin-like 6B
832	NA	NA	NA	NA	NA	NA	214.333	0.00301468	110058	Syt17	synaptotagmin XVII
14411	NA	NA	NA	NA	NA	NA	215	0.00303258	72978	Cnih3	cornichon homolog 3 (Drosophila)
3957	NA	NA	NA	NA	NA	NA	217.667	0.00309166	17919	Myo5b	myosin Vb
7719	NA	NA	NA	NA	NA	NA	217.667	0.00309166	235415	Cplx3	complexin 3
3520	NA	NA	NA	NA	NA	NA	219	0.00313641	16988	Lst1	leukocyte specific transcript 1
1003	NA	NA	NA	NA	NA	NA	219.333	0.00314894	11459	Acta1	actin, alpha 1, skeletal muscle
1635	NA	NA	NA	NA	NA	NA	220.333	0.00318296	12490	Cd34	CD34 antigen
3559	NA	NA	NA	NA	NA	NA	222.333	0.0032474	170677	Pcdh21	protocadherin 21
4805	NA	NA	NA	NA	NA	NA	223.333	0.003285	195646	Hs3st2	heparan sulfate (glucosamine) 3-O-sulfotransferase 2
13685	NA	NA	NA	NA	NA	NA	226.667	0.00338346	70835	Prss22	protease, serine, 22
579	NA	NA	NA	NA	NA	NA	228	0.00341389	107448	Unc5a	unc-5 homolog A (C. elegans)
10710	NA	NA	NA	NA	NA	NA	228.333	0.00342284	56405	Dusp14	dual specificity phosphatase 14
7130	NA	NA	NA	NA	NA	NA	231.333	0.00349982	228777	Nrsn2	neurensin 2
3561	NA	NA	NA	NA	NA	NA	232.333	0.00352667	17069	Ly6e	lymphocyte antigen 6 complex, locus E
14987	NA	NA	NA	NA	NA	NA	232.333	0.00352667	75040	4930504H06Rik	RIKEN cDNA 4930504H06 gene
2311	NA	NA	NA	NA	NA	NA	234	0.00357501	14025	Bcl11a	B-cell CLL/lymphoma 11A (zinc finger protein)
14419	NA	NA	NA	NA	NA	NA	236	0.00362692	73032	Ttc9b	tetratricopeptide repeat domain 9B
4137	NA	NA	NA	NA	NA	NA	237.333	0.00366273	18216	Ntsr1	neurotensin receptor 1
11009	NA	NA	3448	NA	NA	NA	241.667	0.00378088	57780	Fxyd7	FXYD domain-containing ion transport regulator 7
1004	NA	NA	NA	NA	NA	NA	243	0.0038328	114601	Ehbp1l1	EH domain binding protein 1-like 1
1598	NA	NA	NA	NA	NA	NA	244	0.00387039	12426	Cckbr	cholecystokinin B receptor
4377	NA	NA	NA	NA	NA	NA	244.667	0.00391335	18768	Pkib	protein kinase inhibitor beta, cAMP dependent, testis specific
13762	NA	NA	NA	NA	NA	NA	246.333	0.00397601	71091	Cdkl1	cyclin-dependent kinase-like 1 (CDC2-related kinase)
3321	NA	NA	NA	NA	NA	NA	248.667	0.00406194	16539	Kcns2	K+ voltage-gated channel, subfamily S, 2
16137	NA	NA	NA	NA	NA	NA	248.667	0.00406194	93890	Pcdhb19	protocadherin beta 19
13778	NA	NA	NA	NA	NA	NA	250.667	0.00412102	71146	Golga7b	golgi autoantigen, golgin subfamily a, 7B
15779	NA	NA	NA	NA	NA	NA	253.667	0.00421769	78771	Mctp1	multiple C2 domains, transmembrane 1
14228	NA	NA	NA	NA	NA	NA	258.667	0.00437701	72324	Plxdc1	plexin domain containing 1
13876	NA	NA	NA	NA	NA	NA	259.333	0.0043985	71566	9030425E11Rik	RIKEN cDNA 9030425E11 gene
15033	NA	NA	NA	NA	NA	NA	260.333	0.00443609	75288	Slc35f4	solute carrier family 35, member F4
10794	NA	NA	NA	NA	NA	NA	264.667	0.0046169	56534	Hspb3	heat shock protein 3
5665	NA	NA	NA	NA	NA	NA	266.667	0.00468493	212518	Sprn	shadow of prion protein
7300	NA	NA	NA	NA	NA	NA	266.667	0.00468493	230777	Hcrtr1	hypocretin (orexin) receptor 1
8582	NA	NA	NA	NA	NA	NA	271.667	0.00485141	26458	Slc27a2	solute carrier family 27 (fatty acid transporter), member 2
7938	NA	NA	NA	NA	NA	NA	273	0.00490691	23912	Rhof	ras homolog gene family, member f
4599	NA	NA	NA	NA	NA	NA	274	0.00494092	19218	Ptger3	prostaglandin E receptor 3 (subtype EP3)
3307	NA	NA	NA	NA	NA	NA	274.667	0.00497852	16524	Kcnj9	potassium inwardly-rectifying channel, subfamily J, member 9
2395	NA	NA	NA	NA	NA	NA	275	0.00498926	140919	Slc17a6	solute carrier family 17 (sodium-dependent inorganic phosphate cotransporter), member 6
7113	NA	NA	NA	NA	NA	NA	275	0.00498926	228550	Itpka	inositol 1,4,5-trisphosphate 3-kinase A
3870	NA	NA	NA	NA	NA	NA	276.333	0.00503759	17681	Msc	musculin
11019	NA	NA	NA	NA	NA	NA	277.333	0.00506624	57816	Tesc	tescalcin
15249	NA	NA	NA	NA	NA	NA	279.333	0.00515396	75986	Agmat	agmatine ureohydrolase (agmatinase)
2575	NA	NA	NA	NA	NA	NA	280.333	0.00518976	14403	Gabrd	gamma-aminobutyric acid (GABA-A) receptor, subunit delta
5619	NA	NA	NA	NA	NA	NA	280.667	0.0052005	211651	Fancd2	Fanconi anemia, complementation group D2
6566	NA	NA	5036.67	NA	NA	NA	280.667	0.0052005	22342	Lin7b	lin-7 homolog B (C. elegans)
1507	NA	NA	NA	NA	NA	NA	281.667	0.00525421	12296	Cacnb2	calcium channel, voltage-dependent, beta 2 subunit
3728	NA	NA	NA	NA	NA	NA	282.333	0.00529359	17179	Matk	megakaryocyte-associated tyrosine kinase
8170	NA	NA	NA	NA	NA	NA	282.667	0.00529896	241514	Zfp804a	zinc finger protein 804A
9483	NA	NA	NA	NA	NA	NA	283.333	0.00531686	328971	Spink10	serine peptidase inhibitor, Kazal type 10
7985	NA	NA	NA	NA	NA	NA	284	0.00533835	239552	Apol8	apolipoprotein L 8
3530	NA	NA	NA	NA	NA	NA	288.333	0.00552632	17005	Ltk	leukocyte tyrosine kinase
1342	NA	NA	NA	NA	NA	NA	289.667	0.00558539	11922	Neurod6	neurogenic differentiation 6
14955	NA	NA	NA	NA	NA	NA	290	0.00560329	74782	Glt8d2	glycosyltransferase 8 domain containing 2
3658	NA	NA	NA	NA	NA	NA	290.333	0.00561404	171180	Syt12	synaptotagmin XII
15273	NA	NA	NA	NA	NA	NA	293	0.00570533	76117	Arhgap15	Rho GTPase activating protein 15
1889	NA	NA	NA	NA	NA	NA	294	0.00572861	12919	Crhbp	corticotropin releasing hormone binding protein
16289	NA	NA	NA	NA	NA	NA	294	0.00572861	99010	Lpcat4	lysophosphatidylcholine acyltransferase 4
9393	NA	NA	NA	NA	NA	NA	295.667	0.00580738	320722	A330050F15Rik	RIKEN cDNA A330050F15 gene
797	NA	NA	NA	NA	NA	NA	297.333	0.00588256	109648	Npy	neuropeptide Y
9929	NA	NA	NA	NA	NA	NA	297.333	0.00588256	433323	Sgpp2	sphingosine-1-phosphate phosphotase 2
10774	NA	NA	NA	NA	NA	NA	299	0.00595775	56504	Srpk3	serine/arginine-rich protein specific kinase 3
1973	NA	NA	NA	NA	NA	NA	301.667	0.00611887	13056	Cyb561	cytochrome b-561
1736	NA	NA	NA	NA	NA	NA	302	0.00613319	12652	Chga	chromogranin A
7152	NA	NA	NA	NA	NA	NA	302	0.00613319	228942	Cbln4	cerebellin 4 precursor protein
9635	NA	NA	NA	NA	NA	NA	303.667	0.00620122	353156	Egfl7	EGF-like domain 7
9300	NA	NA	NA	NA	NA	NA	305.333	0.00626745	320083	Fbxw16	F-box and WD-40 domain protein 16
7755	NA	NA	NA	NA	NA	NA	305.667	0.00628357	235674	Acaa1b	acetyl-Coenzyme A acyltransferase 1B
4613	NA	NA	NA	NA	NA	NA	307	0.00635517	192199	Rspo1	R-spondin homolog (Xenopus laevis)
2747	NA	NA	NA	NA	NA	NA	308	0.00641246	14738	Gpr12	G-protein coupled receptor 12
8219	NA	NA	NA	NA	NA	NA	308	0.00641246	242584	Wdr78	WD repeat domain 78
8312	NA	NA	NA	NA	NA	NA	308	0.00641246	243967	Ntn5	netrin 5
41	NA	NA	NA	NA	NA	NA	308.333	0.00642678	100040297	100040297	predicted gene, 100040297
2113	NA	NA	6171	NA	NA	NA	308.667	0.00643752	13446	Doc2a	double C2, alpha
4626	NA	NA	NA	NA	NA	NA	308.667	0.00643752	19225	Ptgs2	prostaglandin-endoperoxide synthase 2
2598	NA	NA	NA	NA	NA	NA	309.667	0.00649123	14432	Gap43	growth associated protein 43
8195	NA	NA	NA	NA	NA	NA	310.333	0.0065145	242248	Bank1	B-cell scaffold protein with ankyrin repeats 1
6288	NA	NA	NA	NA	NA	NA	312.667	0.00658611	218763	Lrrc3b	leucine rich repeat containing 3B
2371	NA	NA	NA	NA	NA	NA	313.667	0.00661654	140743	Rem2	rad and gem related GTP binding protein 2
2066	NA	NA	NA	NA	NA	NA	314	0.00662907	13349	Darc	Duffy blood group, chemokine receptor
439	NA	NA	NA	NA	NA	NA	315.667	0.00668994	105349	Akr1c18	aldo-keto reductase family 1, member C18
9706	NA	NA	NA	NA	NA	NA	315.667	0.00668994	381107	E130009J12Rik	RIKEN cDNA E130009J12 gene
400	NA	NA	NA	NA	NA	NA	317.333	0.00678303	104582	Rprml	reprimo-like
15930	NA	NA	NA	NA	NA	NA	318	0.00683315	80976	Syt13	synaptotagmin XIII
10547	NA	NA	NA	NA	NA	NA	318.333	0.00684927	56012	Pgam2	phosphoglycerate mutase 2
7439	NA	NA	NA	NA	NA	NA	321	0.00697279	232201	Arhgap25	Rho GTPase activating protein 25
8713	NA	NA	NA	NA	NA	NA	321	0.00697279	26913	Gprin1	G protein-regulated inducer of neurite outgrowth 1
3941	NA	NA	NA	NA	NA	NA	322.333	0.00700501	17883	Myh3	myosin, heavy polypeptide 3, skeletal muscle, embryonic
10225	NA	NA	NA	NA	NA	NA	324.333	0.00712496	52897	D11Bwg0517e	DNA segment, Chr 11, Brigham & Women's Genetics 0517 expressed
4012	NA	NA	NA	NA	NA	NA	326	0.00724311	18012	Neurod1	neurogenic differentiation 1
4818	NA	NA	NA	NA	NA	NA	327.667	0.00733978	19662	Rbp4	retinol binding protein 4, plasma
5603	NA	NA	NA	NA	NA	NA	328.667	0.0073899	211383	Fam123c	family with sequence similarity 123, member C
6896	NA	NA	NA	NA	NA	NA	331	0.00747941	226419	Dyrk3	dual-specificity tyrosine-(Y)-phosphorylation regulated kinase 3
8120	NA	NA	NA	NA	NA	NA	332	0.00752417	240843	Fam5b	family with sequence similarity 5, member B
6540	NA	NA	NA	NA	NA	NA	333.667	0.00759398	22317	Vamp1	vesicle-associated membrane protein 1
9569	NA	NA	NA	NA	NA	NA	334	0.0076101	330671	B4galnt4	beta-1,4-N-acetyl-galactosaminyl transferase 4
2868	NA	NA	NA	NA	NA	NA	334.667	0.00764232	14998	H2-DMa	histocompatibility 2, class II, locus DMa
8954	NA	NA	NA	NA	NA	NA	336.667	0.00779091	27387	Sh2d3c	SH2 domain containing 3C
3429	NA	NA	NA	NA	3127.33	NA	337.333	0.00783924	16782	Lamc2	laminin, gamma 2
4970	NA	NA	NA	NA	NA	NA	338	0.00788042	20254	Scg2	secretogranin II
9652	NA	NA	NA	NA	NA	NA	341.667	0.00807555	360213	Trim46	tripartite motif-containing 46
14416	NA	NA	NA	NA	NA	NA	342	0.00809882	73010	Gpr22	G protein-coupled receptor 22
322	NA	NA	NA	NA	NA	NA	342.333	0.0081203	103551	E130012A19Rik	RIKEN cDNA E130012A19 gene
4861	NA	NA	NA	NA	NA	NA	343.667	0.00819012	19736	Rgs4	regulator of G-protein signaling 4
3946	NA	NA	5702.67	NA	NA	NA	344	0.00820444	17896	Myl4	myosin, light polypeptide 4
9115	NA	NA	NA	NA	NA	NA	347	0.00835482	29859	Sult4a1	sulfotransferase family 4A, member 1
2157	NA	NA	NA	NA	NA	NA	348.333	0.00843	13555	E2f1	E2F transcription factor 1
4972	NA	NA	NA	NA	NA	NA	348.333	0.00843	20256	Clec11a	C-type lectin domain family 11, member a
9970	NA	NA	NA	NA	NA	NA	351.333	0.0085947	435684	Shf	Src homology 2 domain containing F
14900	NA	NA	NA	NA	NA	NA	351.667	0.0086126	74596	Cds1	CDP-diacylglycerol synthase 1
5970	NA	NA	NA	NA	NA	NA	352	0.0086305	216166	6330514A18Rik	RIKEN cDNA 6330514A18 gene
14401	NA	NA	NA	NA	NA	NA	355	0.00882743	72937	2900008C10Rik	RIKEN cDNA 2900008C10 gene
5718	NA	NA	NA	NA	NA	NA	356	0.00889366	213332	AA474331	expressed sequence AA474331
14164	NA	NA	NA	NA	NA	NA	356.333	0.0089044	72147	Zbtb46	zinc finger and BTB domain containing 46
3938	NA	NA	NA	NA	NA	NA	359	0.00904583	17879	Myh1	myosin, heavy polypeptide 1, skeletal muscle, adult
6493	NA	NA	NA	NA	NA	NA	361.333	0.0091425	22223	Uchl1	ubiquitin carboxy-terminal hydrolase L1
338	NA	NA	NA	NA	NA	NA	361.667	0.00916219	103768	Tubg2	tubulin, gamma 2
12829	NA	NA	NA	NA	NA	NA	362.333	0.00920874	68338	Golt1a	golgi transport 1 homolog A (S. cerevisiae)
3273	NA	NA	NA	NA	NA	NA	363.333	0.00926065	16477	Junb	Jun-B oncogene
4302	NA	NA	NA	NA	NA	NA	364.333	0.00931257	18619	Penk1	preproenkephalin 1
14581	NA	NA	2956	NA	NA	NA	365	0.00935016	73737	1110008P14Rik	RIKEN cDNA 1110008P14 gene
3295	NA	NA	NA	NA	NA	NA	366	0.00939134	16512	Kcnh3	potassium voltage-gated channel, subfamily H (eag-related), member 3
2667	NA	NA	NA	NA	NA	NA	366.333	0.0094164	14608	Gpr83	G protein-coupled receptor 83
11740	NA	NA	NA	NA	NA	NA	366.333	0.0094164	665180	Clec2l	C-type lectin domain family, member l
4225	NA	NA	NA	NA	NA	NA	367	0.00948264	18484	Pam	peptidylglycine alpha-amidating monooxygenase
4147	NA	NA	NA	NA	NA	NA	370	0.00962943	18232	Nxph2	neurexophilin 2
9614	NA	NA	NA	NA	NA	NA	370.333	0.00964912	338352	Nell1	NEL-like 1 (chicken)
3281	NA	NA	NA	NA	NA	NA	370.667	0.00967598	16493	Kcna5	potassium voltage-gated channel, shaker-related subfamily, member 5
1050	NA	NA	NA	NA	NA	NA	371	0.00969925	114886	Cygb	cytoglobin
14931	NA	NA	NA	NA	NA	NA	371.333	0.00971536	74720	Tmem114	transmembrane protein 114
7111	NA	NA	NA	NA	NA	NA	372.333	0.00977444	228543	Rhov	ras homolog gene family, member V
2458	NA	NA	NA	NA	NA	NA	374.333	0.00991228	14200	Fhl2	four and a half LIM domains 2
9872	NA	NA	NA	NA	NA	NA	376	0.0100161	404711	Igh-1b	immunoglobulin heavy chain 1b (serum IgG2c)
7817	NA	NA	NA	NA	NA	NA	377.333	0.0101146	237730	AI595406	expressed sequence AI595406
3084	NA	NA	NA	NA	NA	NA	377.667	0.0101325	15898	Icam5	intercellular adhesion molecule 5, telencephalin
1586	NA	NA	NA	NA	NA	NA	378.667	0.0102059	12405	Cbln2	cerebellin 2 precursor protein
7379	NA	NA	NA	NA	NA	NA	379.333	0.0102435	231605	Galnt9	UDP-N-acetyl-alpha-D-galactosamine:polypeptide N-acetylgalactosaminyltransferase 9
13582	NA	NA	NA	NA	NA	NA	379.667	0.0102578	70481	Pnma1	paraneoplastic antigen MA1
9864	NA	NA	NA	NA	NA	NA	380	0.0102775	403178	Plcxd1	phosphatidylinositol-specific phospholipase C, X domain containing 1
9949	NA	NA	NA	NA	NA	NA	382.333	0.0104243	433904	Ociad2	OCIA domain containing 2
1890	NA	NA	NA	NA	NA	NA	382.667	0.0104475	12921	Crhr1	corticotropin releasing hormone receptor 1
15873	NA	NA	NA	NA	NA	NA	383.667	0.0105138	80515	A030009H04Rik	RIKEN cDNA A030009H04 gene
4512	NA	NA	NA	NA	NA	NA	385.333	0.0106427	19094	Mapk11	mitogen-activated protein kinase 11
12131	NA	NA	NA	NA	NA	NA	385.333	0.0106427	67077	1700019N12Rik	RIKEN cDNA 1700019N12 gene
12318	NA	NA	2907.33	NA	NA	NA	385.667	0.0106606	67399	Pdlim7	PDZ and LIM domain 7
11413	NA	NA	NA	NA	NA	NA	386	0.0106785	654795	Sdr39u1	short chain dehydrogenase/reductase family 39U, member 1
12910	NA	NA	NA	NA	NA	NA	387	0.0107197	68566	Caly	calcyon neuron-specific vesicular protein
1756	NA	NA	NA	NA	NA	NA	389	0.0108163	12700	Cish	cytokine inducible SH2-containing protein
10889	NA	NA	NA	NA	NA	NA	389.667	0.0108611	56846	Necab3	N-terminal EF-hand calcium binding protein 3
10853	NA	NA	NA	NA	NA	NA	391.667	0.0109864	56742	Psrc1	proline/serine-rich coiled-coil 1
9934	NA	NA	NA	NA	NA	NA	393	0.0110562	433485	OTTMUSG00000015750	predicted gene, OTTMUSG00000015750
2149	NA	NA	NA	NA	NA	NA	394	0.0111189	13528	Dtnb	dystrobrevin, beta
3333	NA	NA	NA	NA	NA	NA	396	0.0112281	16559	Kif17	kinesin family member 17
5069	NA	NA	NA	NA	NA	NA	396	0.0112281	20404	Sh3gl2	SH3-domain GRB2-like 2
2252	NA	NA	5706.67	NA	NA	NA	396.667	0.0112692	13829	Epb4.9	erythrocyte protein band 4.9
15628	NA	NA	NA	NA	NA	NA	397.667	0.0113444	77771	Csrnp3	cysteine-serine-rich nuclear protein 3
12344	NA	NA	NA	NA	NA	NA	398.667	0.0114304	67445	C1qtnf4	C1q and tumor necrosis factor related protein 4
3070	NA	NA	NA	NA	NA	NA	401	0.01157	15566	Htr7	5-hydroxytryptamine (serotonin) receptor 7
14509	NA	NA	NA	NA	NA	NA	401.333	0.0115861	73420	1700054N08Rik	RIKEN cDNA 1700054N08 gene
8025	NA	NA	NA	NA	NA	NA	402.333	0.0116362	23989	Med24	mediator complex subunit 24
15175	NA	NA	NA	NA	NA	NA	402.667	0.0116506	75697	Fam148b	family with sequence similarity 148, member B
14370	NA	NA	NA	NA	NA	NA	404.667	0.0117669	72780	Rspo3	R-spondin 3 homolog (Xenopus laevis)
8035	NA	NA	5292	NA	NA	NA	405	0.0117884	24001	Tiam2	T-cell lymphoma invasion and metastasis 2
14038	NA	NA	NA	NA	NA	NA	405.667	0.0118206	71912	Jsrp1	junctional sarcoplasmic reticulum protein 1
14477	NA	NA	NA	NA	NA	NA	408.333	0.0119925	73293	Ccdc103	coiled-coil domain containing 103
5793	NA	NA	NA	NA	NA	NA	409.333	0.0120551	213948	Atg9b	ATG9 autophagy related 9 homolog B (S. cerevisiae)
9477	NA	NA	NA	NA	NA	NA	410.333	0.0121106	328789	Tmhs	tetraspan transmembrane protein, hair cell stereocilia
9753	NA	NA	NA	NA	NA	NA	415	0.0124078	381677	Vgf	VGF nerve growth factor inducible
3129	NA	NA	NA	NA	NA	NA	415.333	0.0124221	16010	Igfbp4	insulin-like growth factor binding protein 4
422	NA	NA	NA	NA	NA	NA	416	0.0124544	104886	Rab15	RAB15, member RAS oncogene family
4203	NA	NA	NA	NA	NA	NA	418.667	0.0126173	18430	Oxtr	oxytocin receptor
12382	NA	NA	NA	NA	NA	NA	422.667	0.012884	67498	Kcnv1	potassium channel, subfamily V, member 1
7167	NA	NA	NA	NA	NA	NA	424.667	0.0130362	229214	Qrfpr	pyroglutamylated RFamide peptide receptor
8138	NA	NA	NA	NA	NA	NA	425	0.013063	241070	Gpr1	G protein-coupled receptor 1
15252	NA	NA	NA	NA	NA	NA	425.333	0.0130791	76000	5033430I15Rik	RIKEN cDNA 5033430I15 gene
1762	NA	NA	NA	NA	NA	NA	427	0.0132313	12716	Ckmt1	creatine kinase, mitochondrial 1, ubiquitous
4129	NA	NA	NA	NA	NA	NA	427.667	0.0132725	18205	Ntf3	neurotrophin 3
9973	NA	NA	NA	NA	NA	NA	427.667	0.0132725	442801	Arhgef15	Rho guanine nucleotide exchange factor (GEF) 15
4692	NA	NA	NA	NA	NA	NA	431.333	0.0135732	19293	Pvalb	parvalbumin
651	NA	NA	NA	NA	NA	NA	434	0.0137487	108068	Grm2	glutamate receptor, metabotropic 2
3280	NA	NA	NA	NA	NA	NA	434.667	0.0138006	16492	Kcna4	potassium voltage-gated channel, shaker-related subfamily, member 4
13653	NA	NA	NA	NA	NA	NA	436	0.0139062	70727	Rasgef1a	RasGEF domain family, member 1A
13313	NA	NA	NA	NA	NA	NA	437	0.0139814	69642	2310046A06Rik	RIKEN cDNA 2310046A06 gene
3722	NA	NA	NA	NA	NA	NA	437.333	0.0140082	17171	Mas1	MAS1 oncogene
12911	NA	NA	NA	NA	NA	NA	438	0.0140619	68567	Cgref1	cell growth regulator with EF hand domain 1
4669	NA	NA	NA	NA	NA	NA	439.333	0.0141765	192678	Rassf3	Ras association (RalGDS/AF-6) domain family member 3
4973	NA	NA	NA	NA	NA	NA	440.667	0.0143018	20257	Stmn2	stathmin-like 2
5831	NA	NA	NA	NA	NA	NA	440.667	0.0143018	214230	Pak6	p21 (CDKN1A)-activated kinase 6
8071	NA	NA	NA	NA	NA	NA	444.333	0.0145632	240332	Slc6a7	solute carrier family 6 (neurotransmitter transporter, L-proline), member 7
5992	NA	NA	NA	NA	NA	NA	447.667	0.0147726	216456	Gls2	glutaminase 2 (liver, mitochondrial)
11942	NA	NA	NA	NA	NA	NA	447.667	0.0147726	66815	Ccdc109b	coiled-coil domain containing 109B
13543	NA	NA	NA	NA	NA	NA	448	0.0147995	70375	Ica1l	islet cell autoantigen 1-like
2752	NA	NA	NA	NA	NA	NA	448.333	0.0148264	14748	Gpr3	G-protein coupled receptor 3
14544	NA	NA	NA	NA	NA	NA	449.667	0.0149212	73635	1700113i22rik	RIKEN cDNA 1700113I22 gene
10242	NA	NA	NA	NA	NA	NA	450.667	0.0150018	53324	Nptx2	neuronal pentraxin 2
12422	NA	NA	NA	NA	NA	NA	452	0.0150949	67576	4930429B21Rik	RIKEN cDNA 4930429B21 gene
14692	NA	NA	NA	NA	NA	NA	452	0.0150949	74134	Cyp2s1	cytochrome P450, family 2, subfamily s, polypeptide 1
15606	NA	NA	NA	NA	NA	NA	453.333	0.0151701	77627	Efcab6	EF-hand calcium binding domain 6
7968	NA	NA	NA	NA	NA	NA	458.333	0.0154995	239405	Rspo2	R-spondin 2 homolog (Xenopus laevis)
4677	NA	NA	NA	NA	2573.33	NA	458.667	0.0155263	19275	Ptprn	protein tyrosine phosphatase, receptor type, N
1596	NA	NA	NA	NA	NA	NA	460	0.0156194	12424	Cck	cholecystokinin
13990	NA	NA	NA	NA	NA	NA	460	0.0156194	71835	Lancl2	LanC (bacterial lantibiotic synthetase component C)-like 2
1896	NA	NA	NA	NA	NA	NA	462	0.0157769	12931	Crlf1	cytokine receptor-like factor 1
13992	NA	NA	NA	NA	NA	NA	463	0.0158468	71837	1700003E16Rik	RIKEN cDNA 1700003E16 gene
13419	NA	NA	NA	NA	NA	NA	463.333	0.0158665	69908	Rab3b	RAB3B, member RAS oncogene family
9237	NA	NA	NA	NA	NA	NA	466	0.0160437	319601	Zfp653	zinc finger protein 653
11557	NA	NA	NA	NA	NA	NA	467.333	0.0161636	66237	Atp6v1g2	ATPase, H+ transporting, lysosomal V1 subunit G2
1516	NA	NA	NA	NA	NA	NA	468	0.0161976	12307	Calb1	calbindin 1
2588	NA	NA	NA	NA	NA	NA	468	0.0161976	14421	B4galnt1	beta-1,4-N-acetyl-galactosaminyl transferase 1
4072	NA	NA	NA	NA	NA	NA	469.333	0.0162907	18113	Nnmt	nicotinamide N-methyltransferase
1552	NA	NA	NA	NA	NA	NA	472.333	0.0165646	12354	Car7	carbonic anhydrase 7
7563	NA	NA	2743	NA	NA	NA	473.333	0.0166488	233733	Galntl4	UDP-N-acetyl-alpha-D-galactosamine:polypeptide N-acetylgalactosaminyltransferase-like 4
595	NA	NA	NA	NA	NA	NA	474.667	0.0167347	107586	Ovol2	ovo-like 2 (Drosophila)
6813	NA	NA	NA	NA	NA	NA	474.667	0.0167347	225870	Rin1	Ras and Rab interactor 1
2793	NA	NA	NA	NA	NA	NA	475	0.016758	14810	Grin1	glutamate receptor, ionotropic, NMDA1 (zeta 1)
6867	NA	NA	NA	NA	NA	NA	475.333	0.0167794	226180	Ina	internexin neuronal intermediate filament protein, alpha
265	NA	NA	NA	NA	NA	NA	477.333	0.0169406	102278	Cpne7	copine VII
6108	NA	NA	NA	NA	NA	NA	477.667	0.0169567	217325	Llgl2	lethal giant larvae homolog 2 (Drosophila)
9758	NA	NA	NA	NA	NA	NA	477.667	0.0169567	381738	Gm1060	gene model 1060, (NCBI)
1505	NA	NA	NA	NA	NA	NA	479.333	0.0170838	12294	Cacna2d3	calcium channel, voltage-dependent, alpha2/delta subunit 3
2769	NA	NA	NA	NA	NA	NA	480	0.0171411	14778	Gpx3	glutathione peroxidase 3
5462	NA	NA	NA	NA	NA	NA	482.333	0.0173684	20907	Stx1a	syntaxin 1A (brain)
4681	NA	NA	NA	NA	NA	NA	484	0.0174955	19279	Ptprr	protein tyrosine phosphatase, receptor type, R
703	NA	NA	6320.33	NA	NA	NA	487.667	0.017773	108699	Chn1	chimerin (chimaerin) 1
10448	NA	NA	NA	NA	NA	NA	489	0.0178536	545527	4932431H17Rik	RIKEN cDNA 4932431H17 gene
7585	NA	NA	6168.33	NA	NA	NA	489.667	0.0179001	233879	Asphd1	aspartate beta-hydroxylase domain containing 1
6778	NA	NA	NA	NA	NA	NA	490	0.0179216	225288	Fhod3	formin homology 2 domain containing 3
481	NA	NA	NA	NA	NA	NA	491.333	0.0180201	105853	Mal2	mal, T-cell differentiation protein 2
5534	NA	NA	NA	NA	NA	NA	491.333	0.0180201	20974	Syngr3	synaptogyrin 3
2772	NA	NA	NA	NA	NA	NA	494	0.0182528	14783	Grb10	growth factor receptor bound protein 10
14387	NA	NA	NA	NA	NA	NA	494.667	0.0183172	72865	Cxx1c	CAAX box 1 homolog C (human)
4896	NA	NA	NA	NA	NA	NA	495	0.0183387	19894	Rph3a	rabphilin 3A
1693	NA	NA	NA	NA	NA	NA	495.667	0.018387	12569	Cdk5r1	cyclin-dependent kinase 5, regulatory subunit 1 (p35)
10102	NA	NA	NA	NA	NA	NA	495.667	0.018387	51800	Bok	BCL2-related ovarian killer protein
10672	NA	NA	NA	NA	NA	NA	496	0.0184157	56349	Net1	neuroepithelial cell transforming gene 1
16325	NA	NA	NA	NA	NA	NA	496.333	0.0184372	99738	Kcnc4	potassium voltage gated channel, Shaw-related subfamily, member 4
3475	NA	NA	NA	NA	NA	NA	496.667	0.0184658	16875	Lhx8	LIM homeobox protein 8
8191	NA	NA	NA	NA	NA	NA	497	0.0184909	242083	Ppm1l	protein phosphatase 1 (formerly 2C)-like
13924	NA	NA	NA	NA	NA	NA	498	0.018584	71720	Osbpl3	oxysterol binding protein-like 3
1737	NA	NA	NA	NA	NA	NA	498.333	0.018609	12653	Chgb	chromogranin B
1818	NA	NA	NA	NA	2771.67	NA	501.333	0.0188292	12810	Coch	coagulation factor C homolog (Limulus polyphemus)
3356	NA	NA	NA	NA	NA	NA	502	0.0188919	16594	Klc2	kinesin light chain 2
2900	NA	NA	NA	NA	NA	NA	504	0.0190763	15165	Hcn1	hyperpolarization-activated, cyclic nucleotide-gated K+ 1
6741	NA	NA	5816	NA	NA	NA	504.333	0.0191013	224813	Gm88	gene model 88, (NCBI)
7961	NA	NA	NA	NA	NA	NA	508.667	0.0194612	23934	Ly6h	lymphocyte antigen 6 complex, locus H
12837	NA	NA	5612.67	NA	NA	NA	512	0.0197118	68355	2010204K13Rik	RIKEN cDNA 2010204K13 gene
13933	NA	NA	NA	NA	NA	NA	512	0.0197118	71733	Susd2	sushi domain containing 2
5898	NA	NA	NA	NA	NA	NA	513.667	0.0197834	215090	Gm50	gene model 50, (NCBI)
1159	NA	NA	NA	NA	NA	NA	514	0.0198067	11682	Alk	anaplastic lymphoma kinase
1888	NA	NA	5420.67	NA	NA	NA	514	0.0198067	12918	Crh	corticotropin releasing hormone
15750	NA	NA	NA	NA	NA	NA	514.667	0.0198639	78593	Nrip3	nuclear receptor interacting protein 3
7235	NA	NA	NA	NA	NA	NA	515	0.0198908	229949	Ak5	adenylate kinase 5
8037	NA	NA	NA	NA	NA	NA	515	0.0198908	240025	Dact2	dapper homolog 2, antagonist of beta-catenin (xenopus)
12264	NA	NA	NA	NA	NA	NA	515.333	0.0199159	67295	Rab3c	RAB3C, member RAS oncogene family
849	NA	NA	NA	NA	NA	NA	515.667	0.0199517	110197	Dgkg	diacylglycerol kinase, gamma
1688	NA	NA	NA	NA	NA	NA	516.333	0.0200376	12564	Cdh8	cadherin 8
7886	NA	NA	NA	NA	NA	NA	517.333	0.020102	238377	Gpr68	G protein-coupled receptor 68
5771	NA	NA	NA	NA	NA	NA	518.333	0.0201933	21375	Tbr1	T-box brain gene 1
906	NA	NA	NA	NA	NA	NA	521.333	0.0204834	110886	Gabra5	gamma-aminobutyric acid (GABA-A) receptor, subunit alpha 5
12601	NA	NA	2639	NA	NA	NA	521.333	0.0204834	67884	1810043G02Rik	RIKEN cDNA 1810043G02 gene
15677	NA	NA	NA	NA	NA	NA	521.333	0.0204834	78088	Ankrd56	ankyrin repeat domain 56
13357	NA	NA	5522.67	NA	NA	NA	521.667	0.0205227	69737	Ttl	tubulin tyrosine ligase
4505	NA	NA	NA	NA	NA	NA	522	0.0205532	19085	Prkar1b	protein kinase, cAMP dependent regulatory, type I beta
1763	NA	NA	NA	NA	NA	NA	525	0.0208181	12721	Coro1a	coronin, actin binding protein 1A
3286	NA	NA	NA	NA	NA	NA	525.333	0.0208432	16499	Kcnab3	potassium voltage-gated channel, shaker-related subfamily, beta member 3
16303	NA	NA	5225	NA	NA	NA	526	0.0208987	99326	Garnl3	GTPase activating RANGAP domain-like 3
3795	2274.67	NA	NA	NA	NA	NA	528.667	0.0211493	17294	Mest	mesoderm specific transcript
10585	NA	NA	NA	NA	NA	NA	529.333	0.021203	56149	Grasp	GRP1 (general receptor for phosphoinositides 1)-associated scaffold protein
140	NA	NA	NA	NA	NA	NA	530.333	0.0212979	100102	Pcsk9	proprotein convertase subtilisin/kexin type 9
15781	NA	NA	NA	NA	NA	NA	531.667	0.0214322	78779	Spata2L	spermatogenesis associated 2-like
2655	NA	NA	NA	NA	NA	NA	532.667	0.0215127	14588	Gfra4	glial cell line derived neurotrophic factor family receptor alpha 4
2644	NA	NA	NA	NA	NA	NA	533.667	0.0216004	14570	Arhgdig	Rho GDP dissociation inhibitor (GDI) gamma
3285	NA	NA	NA	NA	NA	NA	533.667	0.0216004	16498	Kcnab2	potassium voltage-gated channel, shaker-related subfamily, beta member 2
5951	NA	NA	NA	NA	2467.33	NA	534.333	0.0216452	216019	Hkdc1	hexokinase domain containing 1
15869	NA	NA	NA	NA	NA	NA	534.667	0.0216756	80334	Kcnip4	Kv channel interacting protein 4
3093	NA	NA	NA	NA	NA	NA	536	0.0217884	15930	Indo	indoleamine-pyrrole 2,3 dioxygenase
9371	NA	NA	NA	NA	NA	NA	538	0.0219513	320593	A230051N06Rik	RIKEN cDNA A230051N06 gene
15488	NA	NA	NA	NA	NA	NA	539.333	0.0220605	76897	Ralyl	RALY RNA binding protein-like
4650	NA	NA	NA	NA	NA	NA	541	0.022184	19259	Ptpn5	protein tyrosine phosphatase, non-receptor type 5
5676	NA	NA	NA	NA	NA	NA	542.333	0.0222664	212706	C330016O10Rik	RIKEN cDNA C330016O10 gene
1424	NA	NA	5444.67	NA	NA	NA	544.333	0.0224114	12069	Bex2	brain expressed X-linked 2
9574	NA	NA	NA	NA	NA	NA	545	0.0224615	330790	Hapln4	hyaluronan and proteoglycan link protein 4
10240	NA	NA	NA	NA	NA	NA	545.667	0.0225116	53322	Nucb2	nucleobindin 2
9503	NA	NA	NA	NA	NA	NA	546	0.0225331	329502	Pla2g4e	phospholipase A2, group IVE
7978	NA	NA	NA	NA	NA	NA	547	0.022628	23948	Mmp17	matrix metallopeptidase 17
5694	NA	NA	NA	NA	NA	NA	548.333	0.0227676	213006	Mfsd4	major facilitator superfamily domain containing 4
8470	NA	NA	NA	NA	NA	NA	548.333	0.0227676	252870	Usp7	ubiquitin specific peptidase 7
15481	NA	NA	4046.33	NA	NA	NA	549.667	0.0228518	76886	Fam81a	family with sequence similarity 81, member A
9008	NA	NA	NA	NA	NA	NA	550	0.022875	277432	Vstm2l	V-set and transmembrane domain containing 2-like
988	NA	NA	NA	NA	NA	NA	550.667	0.0229252	11438	Chrna4	cholinergic receptor, nicotinic, alpha polypeptide 4
3969	NA	NA	NA	NA	NA	NA	550.667	0.0229252	17933	Myt1l	myelin transcription factor 1-like
4296	NA	NA	NA	NA	NA	NA	551.333	0.0230075	18610	Pdyn	prodynorphin
7214	NA	NA	NA	NA	NA	NA	551.667	0.0230344	229706	Slc6a17	solute carrier family 6 (neurotransmitter transporter), member 17
10190	NA	NA	NA	NA	NA	NA	552.333	0.0230881	52666	D10Ertd610e	DNA segment, Chr 10, ERATO Doi 610, expressed
6876	NA	NA	NA	NA	NA	NA	554.333	0.0232456	226265	6430537H07Rik	RIKEN cDNA 6430537H07 gene
7218	NA	NA	NA	NA	NA	NA	554.333	0.0232456	229722	5330417C22Rik	RIKEN cDNA 5330417C22 gene
8104	NA	NA	NA	NA	NA	NA	555.333	0.023362	240672	Dusp5	dual specificity phosphatase 5
13598	NA	NA	NA	NA	NA	NA	555.667	0.0233942	70549	Tln2	talin 2
8152	NA	NA	NA	NA	NA	NA	557	0.0234819	241201	Cdh7	cadherin 7, type 2
9661	NA	NA	NA	NA	NA	NA	557.667	0.0235285	378937	Lrrc24	leucine rich repeat containing 24
13110	NA	NA	NA	NA	NA	NA	558	0.0235643	69101	Ydjc	YdjC homolog (bacterial)
9529	NA	NA	NA	NA	NA	NA	561.333	0.0238167	329977	Fhad1	forkhead-associated (FHA) phosphopeptide binding domain 1
12849	NA	NA	4761	NA	NA	NA	561.333	0.0238167	68404	Nrn1	neuritin 1
4978	NA	NA	5260.33	NA	NA	NA	564.667	0.02413	20266	Scn1b	sodium channel, voltage-gated, type I, beta
14377	NA	NA	NA	NA	NA	NA	566.333	0.0243126	72821	Scn2b	sodium channel, voltage-gated, type II, beta
10621	NA	NA	NA	NA	NA	NA	566.667	0.024343	56222	Cited4	Cbp/p300-interacting transactivator, with Glu/Asp-rich carboxy-terminal domain, 4
8006	NA	NA	NA	NA	NA	NA	572	0.0248478	23969	Pacsin1	protein kinase C and casein kinase substrate in neurons 1
7942	NA	NA	NA	NA	NA	NA	573	0.024957	239157	Pnma2	paraneoplastic antigen MA2
15160	NA	NA	NA	NA	NA	NA	574	0.0250644	75646	Rai14	retinoic acid induced 14
7742	NA	NA	NA	NA	NA	NA	574.333	0.025077	235604	Camkv	CaM kinase-like vesicle-associated
2466	NA	NA	NA	NA	NA	NA	576.333	0.0252721	14219	Ctgf	connective tissue growth factor
405	NA	NA	NA	NA	NA	NA	579	0.0255245	104709	Pik3r6	phosphoinositide-3-kinase, regulatory subunit 6
3416	NA	NA	NA	NA	NA	NA	579.333	0.0255585	16728	L1cam	L1 cell adhesion molecule
626	NA	NA	NA	NA	NA	NA	579.667	0.025589	107934	Celsr3	cadherin, EGF LAG seven-pass G-type receptor 3 (flamingo homolog, Drosophila)
9729	NA	NA	NA	NA	NA	NA	579.667	0.025589	381350	BC061194	cDNA sequence BC061194
10951	NA	NA	NA	NA	NA	NA	582.333	0.0259345	57340	Jph3	junctophilin 3
4539	NA	NA	NA	NA	NA	NA	584.333	0.0261618	19142	Prss12	protease, serine, 12 neurotrypsin (motopsin)
10280	NA	NA	NA	NA	NA	NA	585	0.0262352	53608	Map3k6	mitogen-activated protein kinase kinase kinase 6
8770	NA	NA	NA	NA	NA	NA	586.667	0.0263874	269608	Plekhg5	pleckstrin homology domain containing, family G (with RhoGef domain) member 5
8237	NA	NA	NA	NA	NA	NA	587	0.0264196	242735	Lrrc38	leucine rich repeat containing 38
8043	NA	NA	NA	NA	NA	NA	589.667	0.0266738	240058	Cpne5	copine V
4965	NA	NA	NA	NA	NA	NA	590.667	0.0267598	20238	Atxn1	ataxin 1
9329	NA	NA	NA	NA	NA	NA	593.333	0.0270372	320265	Fam19a1	family with sequence similarity 19, member A1
12638	NA	NA	NA	NA	NA	NA	594.333	0.0271214	67937	Tmem59l	transmembrane protein 59-like
11604	NA	NA	NA	NA	NA	NA	596	0.0273129	66311	2610036L11Rik	RIKEN cDNA 2610036L11 gene
582	NA	NA	NA	NA	NA	NA	600.333	0.027705	107477	Guca1b	guanylate cyclase activator 1B
716	NA	NA	NA	NA	NA	NA	601	0.0277784	108832	5430405G05Rik	RIKEN cDNA 5430405G05 gene
1508	NA	NA	NA	NA	NA	NA	601	0.0277784	12297	Cacnb3	calcium channel, voltage-dependent, beta 3 subunit
2446	NA	NA	NA	NA	NA	NA	603.333	0.0280129	14180	Fgf9	fibroblast growth factor 9
15007	NA	NA	NA	NA	NA	NA	605.667	0.0282635	75141	Rasd2	RASD family, member 2
221	2073	NA	NA	NA	NA	NA	608	0.0284712	101544	Zfp575	zinc finger protein 575
15267	NA	NA	NA	NA	NA	NA	610	0.0287057	76080	Ttpal	tocopherol (alpha) transfer protein-like
10385	NA	NA	NA	NA	NA	NA	611	0.0287773	54354	Rassf5	Ras association (RalGDS/AF-6) domain family member 5
6803	NA	NA	4542.33	NA	NA	NA	612.333	0.0289241	225742	St8sia5	ST8 alpha-N-acetyl-neuraminide alpha-2,8-sialyltransferase 5
7458	NA	NA	NA	NA	NA	NA	614.333	0.0291443	232409	Clec2e	C-type lectin domain family 2, member e
5933	NA	NA	NA	NA	NA	NA	615.667	0.0292965	215707	Ccdc92	coiled-coil domain containing 92
4105	NA	NA	NA	NA	NA	NA	616.667	0.0294361	18168	Npy5r	neuropeptide Y receptor Y5
9827	NA	NA	NA	NA	NA	NA	617.667	0.0295471	384214	Abhd7	abhydrolase domain containing 7
2261	NA	NA	NA	NA	NA	NA	618	0.0295847	13841	Epha7	Eph receptor A7
7943	NA	NA	NA	NA	NA	NA	619.333	0.0297333	23917	Impdh1	inosine 5'-phosphate dehydrogenase 1
4542	NA	NA	NA	NA	NA	NA	619.667	0.0297726	19152	Prtn3	proteinase 3
3544	NA	NA	NA	NA	NA	NA	620	0.0297977	170571	Cntnap4	contactin associated protein-like 4
4488	NA	NA	5268.33	NA	NA	NA	622.667	0.0300734	19058	Ppp3r1	protein phosphatase 3, regulatory subunit B, alpha isoform (calcineurin B, type I)
8180	NA	NA	NA	NA	NA	NA	623	0.0301038	241638	RP23-100C5.8	ProSAPiP1 protein
5731	NA	NA	NA	NA	2760.67	NA	626.667	0.0305245	213417	Klhdc8a	kelch domain containing 8A
8295	NA	NA	NA	NA	NA	NA	627	0.0305764	243846	Ccdc9	coiled-coil domain containing 9
8795	NA	NA	NA	NA	NA	NA	627.667	0.0306355	269774	Aak1	AP2 associated kinase 1
6782	NA	NA	NA	NA	NA	NA	628.667	0.0307662	225362	Reep2	receptor accessory protein 2
8608	NA	NA	NA	NA	NA	NA	629.333	0.0308253	267019	Rps15a	ribosomal protein S15a
7690	NA	NA	NA	NA	NA	NA	631	0.0310007	235044	BC018242	cDNA sequence BC018242
3081	2104	NA	NA	NA	NA	NA	633	0.0312406	15893	Ica1	islet cell autoantigen 1
3018	NA	NA	NA	NA	NA	NA	635.333	0.0314769	15452	Hprt1	hypoxanthine guanine phosphoribosyl transferase 1
4037	NA	NA	NA	NA	NA	NA	636	0.0315718	18040	Nefm	neurofilament, medium polypeptide
7436	NA	NA	NA	NA	NA	NA	636.667	0.0316362	232174	Cyp26b1	cytochrome P450, family 26, subfamily b, polypeptide 1
7615	NA	NA	NA	NA	NA	NA	637	0.0316613	234290	BC030500	cDNA sequence BC030500
7507	NA	NA	NA	NA	NA	NA	637.333	0.0316917	232975	Atp1a3	ATPase, Na+/K+ transporting, alpha 3 polypeptide
5385	NA	NA	NA	NA	NA	NA	640.667	0.0320068	208439	Klhl29	kelch-like 29 (Drosophila)
3195	NA	NA	NA	NA	NA	NA	643	0.0322431	16319	Incenp	inner centromere protein
5190	NA	NA	NA	NA	NA	NA	643.667	0.032329	20603	Sms	spermine synthase
9340	NA	NA	NA	NA	NA	NA	645.333	0.0324794	320360	Ric3	resistance to inhibitors of cholinesterase 3 homolog (C. elegans)
10591	NA	NA	NA	NA	NA	NA	647.333	0.0326763	56177	Olfm1	olfactomedin 1
6644	NA	NA	NA	NA	NA	NA	648	0.0327515	223881	Rnd1	Rho family GTPase 1
9950	NA	NA	NA	NA	NA	NA	649.333	0.0328876	433938	Mn1	meningioma 1
7675	NA	NA	NA	NA	NA	NA	650	0.0329681	234854	Cdk10	cyclin-dependent kinase (CDC2-like) 10
5203	NA	NA	NA	NA	NA	NA	655.667	0.0335106	20617	Snca	synuclein, alpha
14184	NA	NA	NA	NA	NA	NA	656.667	0.033652	72185	Dbndd1	dysbindin (dystrobrevin binding protein 1) domain containing 1
6258	NA	NA	NA	NA	NA	NA	657.667	0.0337612	21847	Klf10	Kruppel-like factor 10
8473	NA	NA	NA	NA	NA	NA	659.333	0.0339599	252966	Cables2	CDK5 and Abl enzyme substrate 2
6351	NA	NA	NA	NA	NA	NA	660	0.0340136	21929	Tnfaip3	tumor necrosis factor, alpha-induced protein 3
15824	NA	NA	NA	NA	NA	NA	660	0.0340136	78923	Chsy3	chondroitin sulfate synthase 3
11692	2472.33	NA	NA	NA	NA	NA	664.667	0.0345578	66443	Tnfaip8l1	tumor necrosis factor, alpha-induced protein 8-like 1
10451	NA	NA	NA	NA	2679	NA	666	0.0347243	545554	Ankrd34a	ankyrin repeat domain 34A
9924	NA	NA	NA	NA	NA	NA	666.333	0.0347619	433022	Plcxd2	phosphatidylinositol-specific phospholipase C, X domain containing 2
14669	NA	NA	NA	NA	NA	NA	668.333	0.0349696	74100	Arpp21	cyclic AMP-regulated phosphoprotein, 21
4036	NA	NA	NA	NA	NA	NA	669	0.0350286	18039	Nefl	neurofilament, light polypeptide
15279	NA	NA	NA	NA	NA	NA	670	0.0351432	76161	6330527O06Rik	RIKEN cDNA 6330527O06 gene
2902	NA	NA	NA	NA	NA	NA	672.333	0.0354493	15168	Hcn3	hyperpolarization-activated, cyclic nucleotide-gated K+ 3
3098	NA	NA	NA	NA	NA	NA	676.667	0.0360043	15939	Ier5	immediate early response 5
3550	NA	NA	NA	NA	NA	NA	676.667	0.0360043	170638	Hpcal4	hippocalcin-like 4
691	NA	NA	NA	NA	NA	NA	677.333	0.036067	108655	Foxp1	forkhead box P1
7340	NA	NA	NA	NA	NA	NA	677.667	0.0361189	231125	Zfyve28	zinc finger, FYVE domain containing 28
5605	NA	NA	NA	NA	NA	NA	678	0.0361672	211401	Mtss1	metastasis suppressor 1
6460	NA	NA	NA	NA	2333	NA	680.667	0.0364572	22152	Tubb3	tubulin, beta 3
14638	NA	NA	NA	NA	NA	NA	681	0.0364948	74020	Cpne4	copine IV
1872	NA	NA	NA	NA	2593.33	NA	683.333	0.036758	12891	Cpne6	copine VI
8161	NA	NA	NA	NA	NA	NA	685.333	0.0370193	241303	Fam78a	family with sequence similarity 78, member A
7789	NA	NA	NA	NA	NA	NA	687	0.0372234	237213	Glra2	glycine receptor, alpha 2 subunit
7812	NA	NA	NA	NA	NA	NA	687.333	0.0372718	237553	Trhde	TRH-degrading enzyme
8269	2193	NA	NA	NA	NA	NA	688.333	0.0373881	243373	AI854703	expressed sequence AI854703
7221	NA	NA	NA	NA	NA	NA	692.333	0.0378804	229759	Olfm3	olfactomedin 3
7455	NA	NA	NA	NA	NA	NA	695.667	0.038319	232370	Clstn3	calsyntenin 3
5538	NA	NA	NA	NA	NA	NA	696	0.0383799	20977	Syp	synaptophysin
5717	NA	NA	NA	NA	NA	NA	696.333	0.0384354	21333	Tac1	tachykinin 1
4366	NA	NA	NA	NA	NA	NA	696.667	0.0384748	18752	Prkcc	protein kinase C, gamma
5063	NA	NA	6543.33	NA	NA	NA	696.667	0.0384748	20394	Scg5	secretogranin V
16209	NA	NA	NA	NA	NA	NA	697	0.0385034	94332	Cadm3	cell adhesion molecule 3
10716	NA	NA	NA	NA	NA	NA	697.667	0.0385893	56417	Adar	adenosine deaminase, RNA-specific
4868	NA	NA	NA	NA	NA	NA	698	0.0386341	19762	Rit2	Ras-like without CAAX 2
5058	NA	NA	NA	NA	NA	NA	698.667	0.0387415	20389	Sftpc	surfactant associated protein C
12154	NA	NA	NA	NA	NA	NA	698.667	0.0387415	67119	2510048L02Rik	RIKEN cDNA 2510048L02 gene
5523	NA	NA	NA	NA	NA	NA	700.667	0.0389957	20964	Syn1	synapsin I
5304	NA	NA	NA	NA	NA	NA	702.667	0.0392195	207565	Camkk2	calcium/calmodulin-dependent protein kinase kinase 2, beta
5008	NA	NA	NA	NA	3519	NA	705.667	0.039565	20312	Cx3cl1	chemokine (C-X3-C motif) ligand 1
8265	NA	NA	NA	NA	NA	NA	705.667	0.039565	243339	Tmem130	transmembrane protein 130
12345	NA	NA	NA	NA	NA	NA	707	0.039701	67446	Dusp28	dual specificity phosphatase 28
319	NA	NA	NA	NA	NA	NA	708	0.0398174	103511	Fam26e	family with sequence similarity 26, member E
7681	NA	NA	NA	NA	NA	NA	708.333	0.0398586	234915	AK129341	cDNA sequence AK129341
15278	NA	NA	NA	NA	NA	NA	708.333	0.0398586	76157	Slc35d3	solute carrier family 35, member D3
6391	NA	NA	3928.33	NA	NA	NA	711.333	0.040222	21987	Tpd52l1	tumor protein D52-like 1
10085	NA	NA	NA	NA	NA	NA	712.667	0.0404171	50934	Slc7a8	solute carrier family 7 (cationic amino acid transporter, y+ system), member 8
5941	3244	NA	5304.67	NA	NA	NA	714.333	0.0406337	215814	Ccdc28a	coiled-coil domain containing 28A
10094	NA	NA	NA	NA	NA	NA	714.333	0.0406337	51791	Rgs14	regulator of G-protein signaling 14
13600	NA	NA	NA	NA	NA	NA	715.667	0.0408127	70551	Tmtc4	transmembrane and tetratricopeptide repeat containing 4
3971	NA	NA	NA	NA	NA	NA	716.667	0.0409416	17937	Nab2	Ngfi-A binding protein 2
10668	NA	NA	NA	NA	NA	NA	721.333	0.0415449	56336	B4galt5	UDP-Gal:betaGlcNAc beta 1,4-galactosyltransferase, polypeptide 5
6038	NA	NA	6416.33	NA	NA	NA	722.667	0.0416989	216831	AU040829	expressed sequence AU040829
3505	NA	NA	NA	NA	NA	NA	723	0.0417257	16956	Lpl	lipoprotein lipase
15632	NA	NA	NA	NA	NA	NA	723.333	0.0417526	77794	Adamtsl2	ADAMTS-like 2
7487	2358	NA	NA	NA	NA	NA	723.667	0.0417794	232821	Ccdc106	coiled-coil domain containing 106
15608	NA	NA	NA	NA	NA	NA	723.667	0.0417794	77630	A730035I17Rik	RIKEN cDNA A730035I17 gene
13051	NA	NA	NA	NA	NA	NA	725	0.0419477	68952	Fam57b	family with sequence similarity 57, member B
5598	NA	NA	NA	NA	NA	NA	727.333	0.0422001	211232	Cpne9	copine family member IX
11316	NA	NA	4571	NA	NA	NA	731.667	0.0427247	64113	Moap1	modulator of apoptosis 1
7799	NA	NA	NA	NA	NA	NA	732.667	0.0428446	237339	L3mbtl3	l(3)mbt-like 3 (Drosophila)
14578	NA	NA	NA	NA	NA	NA	733	0.0428876	73728	Psd	pleckstrin and Sec7 domain containing
5323	NA	NA	NA	NA	2456.33	NA	735.333	0.0431668	207740	Fam100a	family with sequence similarity 100, member A
13701	NA	NA	NA	NA	3331.33	NA	735.667	0.0431973	70887	Dmrtc1a	DMRT-like family C1a
7962	NA	NA	4162.67	NA	NA	NA	736	0.0432349	23936	Lynx1	Ly6/neurotoxin 1
12259	NA	NA	NA	NA	NA	NA	736	0.0432349	67287	Parp6	poly (ADP-ribose) polymerase family, member 6
12683	NA	NA	NA	NA	NA	NA	737	0.043362	68027	Tmem178	transmembrane protein 178
6965	NA	NA	5281.33	NA	NA	NA	737.667	0.0434515	226970	Arhgef4	Rho guanine nucleotide exchange factor (GEF) 4
8578	NA	NA	2440	NA	NA	NA	737.667	0.0434515	26448	Rage	renal tumor antigen
10661	NA	NA	NA	NA	NA	NA	738	0.0435016	56323	Dnajb5	DnaJ (Hsp40) homolog, subfamily B, member 5
2522	NA	NA	NA	NA	NA	NA	738.667	0.0436144	14296	Frat1	frequently rearranged in advanced T-cell lymphomas
14345	NA	NA	5325	NA	NA	NA	738.667	0.0436144	72693	Zcchc12	zinc finger, CCHC domain containing 12
15389	NA	NA	NA	NA	NA	NA	738.667	0.0436144	76566	Fam101b	family with sequence similarity 101, member B
1919	NA	NA	4470.67	NA	NA	NA	740.333	0.0438185	12971	Crym	crystallin, mu
2226	NA	NA	NA	NA	NA	NA	740.667	0.0438704	13723	Emb	embigin
11695	NA	NA	3715.67	NA	NA	NA	740.667	0.0438704	66447	Mgst3	microsomal glutathione S-transferase 3
10717	NA	NA	5078.67	NA	NA	NA	743.667	0.0442893	56418	Ykt6	YKT6 homolog (S. Cerevisiae)
15119	NA	NA	NA	NA	NA	NA	743.667	0.0442893	75552	Paqr9	progestin and adipoQ receptor family member IX
1359	NA	NA	NA	NA	NA	NA	744	0.0443323	11951	Atp5g1	ATP synthase, H+ transporting, mitochondrial F0 complex, subunit c (subunit 9), isoform 1
7828	NA	NA	NA	NA	NA	NA	746.667	0.0447207	237847	Rtn4rl1	reticulon 4 receptor-like 1
10400	NA	NA	NA	NA	NA	NA	748.333	0.0449875	54384	Mtmr7	myotubularin related protein 7
9028	NA	NA	5466.33	NA	NA	NA	749	0.0450573	27883	D16H22S680E	DNA segment, Chr 16, human D22S680E, expressed
9210	NA	NA	NA	NA	NA	NA	750	0.0451898	319278	A230050P20Rik	RIKEN cDNA A230050P20 gene
1897	NA	NA	NA	NA	NA	NA	750.667	0.0452739	12933	Crmp1	collapsin response mediator protein 1
7703	NA	NA	NA	NA	NA	NA	752.667	0.0455388	235281	Scn3b	sodium channel, voltage-gated, type III, beta
4779	NA	NA	NA	NA	NA	NA	754.667	0.0458217	19419	Rasgrp1	RAS guanyl releasing protein 1
7349	NA	NA	4060	NA	NA	NA	754.667	0.0458217	231238	2310045A20Rik	RIKEN cDNA 2310045A20 gene
11630	NA	NA	4606	NA	NA	NA	756	0.0460079	66355	Gmpr	guanosine monophosphate reductase
1049	NA	NA	NA	NA	NA	NA	758.333	0.0463015	11488	Adam11	a disintegrin and metallopeptidase domain 11
1870	NA	NA	NA	NA	NA	NA	758.667	0.0463462	12889	Cplx1	complexin 1
1433	NA	NA	NA	NA	NA	NA	759	0.046391	12123	Hrk	harakiri, BCL2 interacting protein (contains only BH3 domain)
11388	NA	NA	NA	NA	NA	NA	759	0.046391	65079	Rtn4r	reticulon 4 receptor
14914	NA	NA	NA	NA	NA	NA	760	0.0465449	74665	Lrrc48	leucine rich repeat containing 48
5153	NA	NA	NA	NA	NA	NA	760.333	0.0466004	20527	Slc2a3	solute carrier family 2 (facilitated glucose transporter), member 3
4777	NA	NA	NA	NA	NA	NA	761.667	0.0467956	19417	Rasgrf1	RAS protein-specific guanine nucleotide-releasing factor 1
4632	NA	NA	NA	NA	NA	NA	764.333	0.0471608	19229	Ptk2b	PTK2 protein tyrosine kinase 2 beta
2242	NA	NA	NA	NA	NA	NA	765	0.0472592	13807	Eno2	enolase 2, gamma neuronal
12586	NA	NA	5505.33	NA	NA	NA	765	0.0472592	67865	Rgs10	regulator of G-protein signalling 10
8631	NA	NA	NA	NA	NA	NA	767.667	0.04756	268481	Krt222	keratin 222
2106	NA	NA	NA	NA	NA	NA	772	0.048106	13429	Dnm1	dynamin 1
14804	NA	NA	NA	NA	NA	NA	772	0.048106	74356	4931428F04Rik	RIKEN cDNA 4931428F04 gene
12279	NA	NA	NA	NA	NA	NA	776.667	0.0487129	67326	1700037H04Rik	RIKEN cDNA 1700037H04 gene
4940	NA	NA	2323.33	NA	NA	NA	777.667	0.0488632	20194	S100a10	S100 calcium binding protein A10 (calpactin)
1605	NA	NA	5535.67	NA	NA	NA	778	0.0489116	12447	Ccne1	cyclin E1
8200	NA	NA	3578.33	NA	NA	NA	779.667	0.0491192	242297	Fam110b	family with sequence similarity 110, member B
11439	NA	NA	4118	NA	NA	NA	780	0.0491586	66049	Rogdi	rogdi homolog (Drosophila)
2368	NA	NA	NA	NA	NA	NA	781.333	0.0493323	14073	Faah	fatty acid amide hydrolase
7717	NA	NA	NA	NA	NA	NA	781.333	0.0493323	235402	Lingo1	leucine rich repeat and Ig domain containing 1
358	NA	NA	NA	NA	NA	NA	784.667	0.0498013	104079	Nxph3	neurexophilin 3

## Sheet: All_data - Table 1
Row	OPC_SI	OPC_pSI	Astrocyte_SI	Astrocyte_pSI	Oligodendroctye_SI	Oligodendrocyte_pSI	Neuron_SI	Neuron_pSI	Entrez	Symbol	Name
1	NA	NA	NA	NA	NA	NA	NA	NA	100009600	Glp1	GATA-like 1
2	NA	NA	NA	NA	NA	NA	NA	NA	100012	Oog3	oogenesin 3
3	NA	NA	NA	NA	137.667	0.00117836	NA	NA	100017	Ldlrap1	low density lipoprotein receptor adaptor protein 1
4	NA	NA	NA	NA	NA	NA	NA	NA	100019	Mdn1	midasin homolog (yeast)
5	NA	NA	NA	NA	NA	NA	NA	NA	100034251	OTTMUSG00000000971	predicted gene, OTTMUSG00000000971
6	3461	NA	4453	NA	NA	NA	2158	NA	100036521	LOC100036521	hypothetical gene LOC100036521
7	4367.33	NA	2293.67	NA	2283.67	NA	NA	NA	100037258	Dnajc3	DnaJ (Hsp40) homolog, subfamily C, member 3
8	NA	NA	NA	NA	NA	NA	NA	NA	100037278	Fam129c	family with sequence similarity 129, member C
9	NA	NA	NA	NA	NA	NA	879.333	0.0625994	100038570	OTTMUSG00000003947	predicted gene, OTTMUSG00000003947
10	NA	NA	NA	NA	NA	NA	NA	NA	100038635	ENSMUSG00000074075	predicted gene, ENSMUSG00000074075
11	3023.67	NA	5318	NA	3715.67	NA	3259	NA	100038887
12	NA	NA	374.333	0.00731829	NA	NA	NA	NA	100038959	100038959	predicted gene, 100038959
13	NA	NA	NA	NA	NA	NA	NA	NA	100039027	100039027	predicted gene, 100039027
14	NA	NA	NA	NA	NA	NA	NA	NA	100039094	100039094	predicted gene, 100039094
15	NA	NA	NA	NA	NA	NA	NA	NA	100039235	LOC100039235	hypothetical protein LOC100039235
16	588.667	0.0211045	NA	NA	NA	NA	NA	NA	100039282	100039282	predicted gene, 100039282
17	2360.67	NA	5694.33	NA	NA	NA	1573	NA	100039284	100039284	predicted gene, 100039284
18	NA	NA	NA	NA	NA	NA	NA	NA	100039307	100039307	predicted gene, 100039307
19	NA	NA	NA	NA	NA	NA	NA	NA	100039332	100039332	predicted gene, 100039332
20	NA	NA	NA	NA	NA	NA	NA	NA	100039359	LOC100039359	hypothetical protein LOC100039359
21	1689	NA	4014.67	NA	NA	NA	NA	NA	100039495	OTTMUSG00000025463	predicted gene, OTTMUSG00000025463
22	NA	NA	NA	NA	NA	NA	NA	NA	100039516	LOC100039516	similar to putative
23	NA	NA	NA	NA	NA	NA	NA	NA	100039590	LOC100039590	similar to transforming growth factor, beta receptor III (betaglycan, 300kDa)
24	NA	NA	NA	NA	NA	NA	NA	NA	100039599	LOC100039599	hypothetical protein LOC100039599
25	NA	NA	NA	NA	NA	NA	NA	NA	100039652	100039652	predicted gene, 100039652
26	NA	NA	NA	NA	NA	NA	NA	NA	100039684	100039684	predicted gene, 100039684
27	NA	NA	NA	NA	NA	NA	NA	NA	100039773
28	NA	NA	NA	NA	NA	NA	NA	NA	100039795	Ildr2	immunoglobulin-like domain containing receptor 2
29	NA	NA	NA	NA	NA	NA	NA	NA	100039844	100039844	predicted gene, 100039844
30	NA	NA	NA	NA	NA	NA	NA	NA	100039855	100039855	predicted gene, 100039855
31	NA	NA	NA	NA	NA	NA	NA	NA	100039883	100039883	predicted gene, 100039883
32	NA	NA	785.333	0.0350689	NA	NA	NA	NA	100039968	OTTMUSG00000009332	predicted gene, OTTMUSG00000009332
33	NA	NA	NA	NA	NA	NA	NA	NA	100040018	ENSMUSG00000049365	predicted gene, ENSMUSG00000049365
34	NA	NA	NA	NA	NA	NA	NA	NA	100040086	100040086	predicted gene, 100040086
35	NA	NA	NA	NA	NA	NA	NA	NA	100040093	100040093	predicted gene, 100040093
36	2281	NA	611.333	0.0208236	NA	NA	NA	NA	100040174	100040174	predicted gene, 100040174
37	NA	NA	NA	NA	NA	NA	NA	NA	100040201	LOC100040201	similar to glycine tyrosine-rich hair keratin protein
38	NA	NA	NA	NA	NA	NA	NA	NA	100040214	LOC100040214	similar to keratin associated protein 6-1
39	2961	NA	3846	NA	3762.33	NA	4421	NA	100040220	ENSMUSG00000052825	predicted gene, ENSMUSG00000052825
40	NA	NA	1665	NA	5142.67	NA	2841.67	NA	100040287	LOC100040287	similar to ubiquinol-cytochrome c reductase subunit
41	NA	NA	NA	NA	NA	NA	308.333	0.00642678	100040297	100040297	predicted gene, 100040297
42	NA	NA	NA	NA	NA	NA	NA	NA	100040322	LOC100040322	hypothetical protein LOC100040322
43	2901.33	NA	4308.67	NA	5861.33	NA	1835	NA	100040353	2810416G20Rik	RIKEN cDNA 2810416G20 gene
44	1439	NA	1617.33	NA	NA	NA	NA	NA	100040358	100040358	predicted gene, 100040358
45	2949	NA	NA	NA	5210	NA	1296.67	NA	100040437	100040437	predicted gene, 100040437
46	NA	NA	NA	NA	NA	NA	NA	NA	100040447	1700036A12Rik	RIKEN cDNA 1700036A12 gene
47	NA	NA	NA	NA	NA	NA	NA	NA	100040465	100040465	predicted gene, 100040465
48	NA	NA	NA	NA	NA	NA	NA	NA	100040511	100040511	predicted gene, 100040511
49	2185	NA	5280.33	NA	4957	NA	2868.67	NA	100040518
50	NA	NA	NA	NA	NA	NA	NA	NA	100040529	100040529	predicted gene, 100040529
51	NA	NA	NA	NA	NA	NA	NA	NA	100040569
52	NA	NA	NA	NA	NA	NA	NA	NA	100040591	Kcnj13	potassium inwardly-rectifying channel, subfamily J, member 13
53	2861	NA	5630.33	NA	1303.67	NA	4677	NA	100040608	Fancf	Fanconi anemia, complementation group F
54	NA	NA	NA	NA	NA	NA	NA	NA	100040623
55	NA	NA	NA	NA	NA	NA	NA	NA	100040724	100040724	predicted gene, 100040724
56	NA	NA	NA	NA	NA	NA	NA	NA	100040766	LOC100040766	similar to hCG2012694
57	NA	NA	7.66667	1.02579e-05	NA	NA	NA	NA	100040792	OTTMUSG00000002879	predicted gene, OTTMUSG00000002879
58	1951	NA	2703.67	NA	3518.67	NA	NA	NA	100040799
59	NA	NA	NA	NA	NA	NA	NA	NA	100040834	100040834	predicted gene, 100040834
60	NA	NA	NA	NA	NA	NA	NA	NA	100041035
61	NA	NA	NA	NA	NA	NA	NA	NA	100041122
62	NA	NA	NA	NA	NA	NA	NA	NA	100041241	100041241	predicted gene, 100041241
63	NA	NA	NA	NA	NA	NA	NA	NA	100041290	D4Ertd617e	DNA segment, Chr 4, ERATO Doi 617, expressed
64	5475.67	NA	2469	NA	3029.67	NA	3464.67	NA	100041294	100041294	predicted gene, 100041294
65	NA	NA	NA	NA	NA	NA	NA	NA	100041347	OTTMUSG00000005133	predicted gene, OTTMUSG00000005133
66	NA	NA	NA	NA	NA	NA	NA	NA	100041434	100041434	predicted gene, 100041434
67	NA	NA	NA	NA	NA	NA	NA	NA	100041479	100041479	predicted gene, 100041479
68	NA	NA	NA	NA	NA	NA	NA	NA	100041524	100041524	predicted gene, 100041524
69	NA	NA	NA	NA	NA	NA	NA	NA	100041587	LOC100041587	hypothetical protein LOC100041587
70	NA	NA	NA	NA	NA	NA	NA	NA	100041613	100041613	predicted gene, 100041613
71	NA	NA	NA	NA	NA	NA	NA	NA	100041660	100041660	predicted gene, 100041660
72	NA	NA	NA	NA	NA	NA	NA	NA	100041693	LOC100041693	similar to putative pheromone receptor
73	NA	NA	NA	NA	NA	NA	NA	NA	100041797	100041797	predicted gene, 100041797
74	NA	NA	373	0.00727286	NA	NA	NA	NA	100041799	100041799	predicted gene, 100041799
75	NA	NA	NA	NA	NA	NA	NA	NA	100041800	100041800	predicted gene, 100041800
76	NA	NA	NA	NA	NA	NA	NA	NA	100041870	100041870	predicted gene, 100041870
77	NA	NA	NA	NA	NA	NA	NA	NA	100041960	9230110K08Rik	RIKEN cDNA 9230110K08 gene
78	3152	NA	3501	NA	4757.33	NA	3707	NA	100042008	ENSMUSG00000044965	predicted gene, ENSMUSG00000044965
79	3935	NA	3848	NA	4909.67	NA	2471	NA	100042069	OTTMUSG00000019498	predicted gene, OTTMUSG00000019498
80	NA	NA	NA	NA	NA	NA	151.333	0.0013498	100042132	OTTMUSG00000006514	predicted gene, OTTMUSG00000006514
81	NA	NA	NA	NA	NA	NA	NA	NA	100042150	LOC100042150	similar to NTAK alpha2
82	NA	NA	NA	NA	NA	NA	NA	NA	100042165	BC005561	cDNA sequence BC005561
83	NA	NA	NA	NA	NA	NA	NA	NA	100042173	OTTMUSG00000005107	predicted gene, OTTMUSG00000005107
84	NA	NA	16.3333	2.34467e-05	NA	NA	NA	NA	100042178	OTTMUSG00000010446	predicted gene, OTTMUSG00000010446
85	NA	NA	3348	NA	4391.33	NA	2050.67	NA	100042179	ENSMUSG00000045886	predicted gene, ENSMUSG00000045886
86	NA	NA	NA	NA	NA	NA	NA	NA	100042277	100042277	predicted gene, 100042277
87	NA	NA	NA	NA	NA	NA	NA	NA	100042356	Ddx43	DEAD (Asp-Glu-Ala-Asp) box polypeptide 43
88	NA	NA	NA	NA	NA	NA	NA	NA	100042379
89	NA	NA	NA	NA	NA	NA	NA	NA	100042390	100042390	predicted gene, 100042390
90	NA	NA	NA	NA	NA	NA	NA	NA	100042416	D830025C05Rik	RIKEN cDNA D830025C05 gene
91	NA	NA	NA	NA	NA	NA	NA	NA	100042456
92	NA	NA	NA	NA	NA	NA	NA	NA	100042484	100042484	predicted gene, 100042484
93	NA	NA	NA	NA	NA	NA	NA	NA	100042500
94	NA	NA	NA	NA	NA	NA	NA	NA	100042581	100042581	predicted gene, 100042581
95	NA	NA	NA	NA	NA	NA	NA	NA	100042588	100042588	predicted gene, 100042588
96	NA	NA	NA	NA	NA	NA	NA	NA	100042605	100042605	predicted gene, 100042605
97	2051.67	NA	475.333	0.012075	NA	NA	NA	NA	100042616	100042616	predicted gene, 100042616
98	NA	NA	NA	NA	NA	NA	NA	NA	100042620	LOC100042620	similar to putative
99	NA	NA	NA	NA	NA	NA	NA	NA	100042764
100	NA	NA	NA	NA	NA	NA	NA	NA	100042789
101	NA	NA	NA	NA	NA	NA	NA	NA	100042793	OTTMUSG00000019562	predicted gene, OTTMUSG00000019562
102	NA	NA	NA	NA	NA	NA	NA	NA	100042815
103	NA	NA	NA	NA	NA	NA	NA	NA	100042830
104	NA	NA	1130	0.0717907	NA	NA	NA	NA	100042889	100042889	predicted gene, 100042889
105	NA	NA	NA	NA	NA	NA	NA	NA	100042902	100042902	predicted gene, 100042902
106	NA	NA	NA	NA	NA	NA	NA	NA	100042905
107	NA	NA	NA	NA	NA	NA	NA	NA	100042938
108	NA	NA	NA	NA	NA	NA	NA	NA	100042958	100042958	predicted gene, 100042958
109	2307.33	NA	2076	NA	4441.67	NA	NA	NA	100042972
110	NA	NA	NA	NA	NA	NA	NA	NA	100042978
111	NA	NA	5173	NA	NA	NA	1239.67	NA	100043064	100043064	predicted gene, 100043064
112	1480.33	NA	NA	NA	NA	NA	1855	NA	100043072	100043072	predicted gene, 100043072
113	NA	NA	NA	NA	NA	NA	NA	NA	100043081
114	NA	NA	NA	NA	NA	NA	NA	NA	100043132	100043132	predicted gene, 100043132
115	3492.33	NA	5000.67	NA	3826	NA	2978.67	NA	100043157
116	NA	NA	NA	NA	NA	NA	NA	NA	100043173	BB114814	expressed sequence BB114814
117	NA	NA	4493.67	NA	NA	NA	1635.67	NA	100043181
118	NA	NA	NA	NA	NA	NA	NA	NA	100043290	100043290	predicted gene, 100043290
119	NA	NA	NA	NA	NA	NA	97	0.000553169	100043375	OTTMUSG00000015348	predicted gene, OTTMUSG00000015348
120	NA	NA	NA	NA	NA	NA	NA	NA	100043413	100043413	predicted gene, 100043413
121	NA	NA	NA	NA	NA	NA	NA	NA	100043424	LOC100043424	hypothetical protein LOC100043424
122	1219	0.0958568	NA	NA	2319	NA	NA	NA	100043468	100043468	predicted gene, 100043468
123	NA	NA	NA	NA	NA	NA	NA	NA	100043487
124	NA	NA	NA	NA	NA	NA	NA	NA	100043544
125	NA	NA	NA	NA	NA	NA	NA	NA	100043575	100043575	predicted gene, 100043575
126	NA	NA	NA	NA	NA	NA	NA	NA	100043597	Srcap	Snf2-related CREBBP activator protein
127	NA	NA	NA	NA	NA	NA	NA	NA	100043601	LOC100043601	hypothetical protein LOC100043601
128	NA	NA	NA	NA	NA	NA	NA	NA	100043736	ENSMUSG00000074807	predicted gene, ENSMUSG00000074807
129	NA	NA	NA	NA	NA	NA	NA	NA	100043753	100043753	predicted gene, 100043753
130	2945.33	NA	1695	NA	4107.33	NA	NA	NA	100043766	OTTMUSG00000015563	predicted gene, OTTMUSG00000015563
131	NA	NA	NA	NA	NA	NA	NA	NA	100043777	100043777	predicted gene, 100043777
132	NA	NA	NA	NA	NA	NA	NA	NA	100043812	100043812	predicted gene, 100043812
133	NA	NA	NA	NA	NA	NA	NA	NA	100043911	LOC100043911	hypothetical protein LOC100043911
134	NA	NA	NA	NA	NA	NA	NA	NA	100061	Lrrc19	leucine rich repeat containing 19
135	NA	NA	NA	NA	NA	NA	NA	NA	100066	Cyp2j11	cytochrome P450, family 2, subfamily j, polypeptide 11
136	NA	NA	NA	NA	NA	NA	NA	NA	100072	Camta1	calmodulin binding transcription activator 1
137	4430.67	NA	2603.33	NA	3618	NA	4127.67	NA	100087	Kti12	KTI12 homolog, chromatin associated (S. cerevisiae)
138	NA	NA	NA	NA	641.667	0.0278086	NA	NA	100088	Rcc1	regulator of chromosome condensation 1
139	NA	NA	NA	NA	2144	NA	2512.67	NA	100090	Zbtb48	zinc finger and BTB domain containing 48
140	NA	NA	NA	NA	NA	NA	530.333	0.0212979	100102	Pcsk9	proprotein convertase subtilisin/kexin type 9
141	2747.67	NA	5365.67	NA	2455	NA	4357.33	NA	100121	Tdrd7	tudor domain containing 7
142	NA	NA	NA	NA	NA	NA	NA	NA	100129	Gpr153	G protein-coupled receptor 153
143	4110.33	NA	1513	NA	4945	NA	4084	NA	100163	Pafah2	platelet-activating factor acetylhydrolase 2
144	2688.67	NA	2945.33	NA	2075.33	NA	NA	NA	100169	Phactr4	phosphatase and actin regulator 4
145	NA	NA	4340	NA	1951.33	NA	NA	NA	100177	Zmym6	zinc finger, MYM-type 6
146	NA	NA	NA	NA	NA	NA	NA	NA	100182	Akna	AT-hook transcription factor
147	NA	NA	NA	NA	NA	NA	NA	NA	100198	H6pd	hexose-6-phosphate dehydrogenase (glucose 1-dehydrogenase)
148	2131	NA	3591.67	NA	NA	NA	2872	NA	100201	Tmem64	transmembrane protein 64
149	4428	NA	2166.33	NA	3781.33	NA	4300	NA	100206	Adprhl2	ADP-ribosylhydrolase like 2
150	4987	NA	2614	NA	2015	NA	4674.33	NA	100210	Gpn2	GPN-loop GTPase 2
151	NA	NA	NA	NA	962	0.0626617	2421	NA	100213	Rusc2	RUN and SH3 domain containing 2
152	2330	NA	4914.67	NA	3439.67	NA	4345.33	NA	100226	Stx12	syntaxin 12
153	3523.67	NA	1795.67	NA	NA	NA	3721.67	NA	100273	Osbpl9	oxysterol binding protein-like 9
154	5036	NA	5373.67	NA	1928.67	NA	2282	NA	100317	AU040320	expressed sequence AU040320
155	3705.33	NA	5085	NA	2188.67	NA	3970.67	NA	100336	Ppp1r8	protein phosphatase 1, regulatory (inhibitor) subunit 8
156	NA	NA	861.333	0.0422699	NA	NA	NA	NA	100340	Smpdl3b	sphingomyelin phosphodiesterase, acid-like 3B
157	NA	NA	NA	NA	NA	NA	NA	NA	100342	Fam46b	family with sequence similarity 46, member B
158	NA	NA	NA	NA	NA	NA	NA	NA	100382	AW011738	expressed sequence AW011738
159	4948	NA	2957.67	NA	1974.67	NA	4525	NA	100383	Bsdc1	BSD domain containing 1
160	2157.67	NA	4825	NA	366	0.00864184	NA	NA	100434	Slc44a1	solute carrier family 44, member 1
161	NA	NA	NA	NA	NA	NA	NA	NA	100465	Mobkl2c	MOB1, Mps One Binder kinase activator-like 2C (yeast)
162	NA	NA	NA	NA	NA	NA	NA	NA	100470	Lao1	L-amino acid oxidase 1
163	NA	NA	3738	NA	4184	NA	2808.33	NA	100494	Zfand2a	zinc finger, AN1-type domain 2A
164	679	0.0287122	NA	NA	NA	NA	NA	NA	100515	Zfp518b	zinc finger protein 518B
165	1459	NA	6195.33	NA	2628.33	NA	4390	NA	100532	Rell1	RELT-like 1
166	NA	NA	NA	NA	NA	NA	NA	NA	100559	Ugt2b38	UDP glucuronosyltransferase 2 family, polypeptide B38
167	3227.33	NA	6345.33	NA	480.333	0.0155226	4120	NA	100561	Slc15a4	solute carrier family 15, member 4
168	NA	NA	NA	NA	1288	NA	NA	NA	100604	Lrrc8c	leucine rich repeat containing 8 family, member C
169	NA	NA	5877.67	NA	3566.33	NA	1459.33	NA	100608	Noc4l	nucleolar complex associated 4 homolog (S. cerevisiae)
170	NA	NA	NA	NA	2143	NA	1697.67	NA	100609	Nsun5	NOL1/NOP2/Sun domain family, member 5
171	NA	NA	5627.67	NA	2620.33	NA	2368	NA	100637	N4bp2l1	NEDD4 binding protein 2-like 1
172	NA	NA	NA	NA	NA	NA	NA	NA	100647	Upk3b	uroplakin 3B
173	4680.67	NA	1097.33	0.0679132	2543.33	NA	NA	NA	100678	Psph	phosphoserine phosphatase
174	NA	NA	3936.33	NA	NA	NA	NA	NA	100683	Trrap	transformation/transcription domain-associated protein
175	NA	NA	NA	NA	NA	NA	NA	NA	100689	Spon2	spondin 2, extracellular matrix protein
176	2256.67	NA	4169	NA	2906	NA	NA	NA	100710	Pds5b	PDS5, regulator of cohesion maintenance, homolog B (S. cerevisiae)
177	NA	NA	NA	NA	NA	NA	NA	NA	100727	Ugt2b34	UDP glucuronosyltransferase 2 family, polypeptide B34
178	NA	NA	5669.67	NA	NA	NA	867	0.0609846	100732	Mapre3	microtubule-associated protein, RP/EB family, member 3
179	NA	NA	5847.33	NA	NA	NA	1549.33	NA	100737	Dcun1d4	DCN1, defective in cullin neddylation 1, domain containing 4 (S. cerevisiae)
180	4167.67	NA	4981	NA	743	0.0375309	4417.67	NA	100756	Usp30	ubiquitin specific peptidase 30
181	3533.67	NA	5705.33	NA	3723.67	NA	2354.33	NA	100763	Ube3c	ubiquitin protein ligase E3C
182	NA	NA	1330	0.0974648	NA	NA	2217	NA	100764	1110008J03Rik	RIKEN cDNA 1110008J03 gene
183	NA	NA	NA	NA	NA	NA	NA	NA	100855	Tbc1d14	TBC1 domain family, member 14
184	NA	NA	529	0.0153195	NA	NA	NA	NA	100900	Hscb	HscB iron-sulfur cluster co-chaperone homolog (E. coli)
185	NA	NA	NA	NA	NA	NA	NA	NA	100929	Tyw1	tRNA-yW synthesizing protein 1 homolog (S. cerevisiae)
186	NA	NA	NA	NA	NA	NA	NA	NA	100952	Emilin1	elastin microfibril interfacer 1
187	NA	NA	2331	NA	NA	NA	2661.67	NA	100972	Rab28	RAB28, member RAS oncogene family
188	NA	NA	NA	NA	NA	NA	NA	NA	100978	Nfxl1	nuclear transcription factor, X-box binding-like 1
189	NA	NA	NA	NA	NA	NA	NA	NA	100986	Akap9	A kinase (PRKA) anchor protein (yotiao) 9
190	3282.33	NA	2921.33	NA	3925.67	NA	4683	NA	101023	Zfp513	zinc finger protein 513
191	NA	NA	NA	NA	NA	NA	NA	NA	101095	Zfp282	zinc finger protein 282
192	NA	NA	NA	NA	NA	NA	NA	NA	101100	Ttll3	tubulin tyrosine ligase-like family, member 3
193	NA	NA	2730.33	NA	NA	NA	1350	NA	101113	Snx21	sorting nexin family member 21
194	3024.33	NA	5401.67	NA	954.333	0.0617611	NA	NA	101118	Tmem168	transmembrane protein 168
195	NA	NA	1289.33	0.0919226	NA	NA	1609.33	NA	101122	Rpusd3	RNA pseudouridylate synthase domain containing 3
196	3529.33	NA	5032.33	NA	1035	0.072079	4768.67	NA	101142	Itfg2	integrin alpha FG-GAP repeat containing 2
197	1557.33	NA	5136.33	NA	3969	NA	NA	NA	101148	B630005N14Rik	RIKEN cDNA B630005N14 gene
198	2667	NA	5384.33	NA	1792.67	NA	4760	NA	101185	Pot1a	protection of telomeres 1A
199	1711	NA	3983	NA	5824.67	NA	3359.67	NA	101187	Parp11	poly (ADP-ribose) polymerase family, member 11
200	NA	NA	4846.33	NA	NA	NA	2140.33	NA	101197	AI894139	expressed sequence AI894139
201	NA	NA	NA	NA	NA	NA	NA	NA	101202	Hepacam2	HEPACAM family member 2
202	2910.67	NA	4430.67	NA	3932	NA	3899	NA	101206	Tada3l	transcriptional adaptor 3 (NGG1 homolog, yeast)-like
203	1822.67	NA	4313	NA	4081.67	NA	NA	NA	101214	Tra2a	transformer 2 alpha homolog (Drosophila)
204	5216	NA	3334.67	NA	678	0.0311719	4675	NA	101240	Wdr91	WD repeat domain 91
205	4347	NA	3196.67	NA	4269.33	NA	3212.33	NA	101314	6720456B07Rik	RIKEN cDNA 6720456B07 gene
206	NA	NA	475.667	0.0120941	NA	NA	NA	NA	101351	A130022J15Rik	RIKEN cDNA A130022J15 gene
207	NA	NA	4209	NA	NA	NA	NA	NA	101358	Fbxl14	F-box and leucine-rich repeat protein 14
208	NA	NA	NA	NA	NA	NA	NA	NA	101359	D330027H18Rik	RIKEN cDNA D330027H18 gene
209	NA	NA	NA	NA	NA	NA	NA	NA	101434	Ceacam15	carcinoembryonic antigen-related cell adhesion molecule 15
210	4737	NA	2295.33	NA	4763.67	NA	NA	NA	101437	Dhx32	DEAH (Asp-Glu-Ala-His) box polypeptide 32
211	3534	NA	4993.67	NA	2107	NA	NA	NA	101471	Phrf1	PHD and ring finger domains 1
212	2589.67	NA	6503	NA	709.333	0.0341933	4271.67	NA	101476	Plekha1	pleckstrin homology domain containing, family A (phosphoinositide binding specific) member 1
213	NA	NA	NA	NA	NA	NA	NA	NA	101488	Slco2b1	solute carrier organic anion transporter family, member 2b1
214	4082.33	NA	5615.33	NA	1891	NA	3355.67	NA	101489	Ric8	resistance to inhibitors of cholinesterase 8 homolog (C. elegans)
215	3514.67	NA	5737	NA	998.667	0.0672612	NA	NA	101490	Inpp5f	inositol polyphosphate-5-phosphatase F
216	1668.67	NA	1511.67	NA	NA	NA	NA	NA	101497	Plekhg2	pleckstrin homology domain containing, family G (with RhoGef domain) member 2
217	3325.33	NA	1635.67	NA	2675.33	NA	NA	NA	101502	Hsd3b7	hydroxy-delta-5-steroid dehydrogenase, 3 beta- and steroid delta-isomerase 7
218	NA	NA	3468.33	NA	2933	NA	2118.67	NA	101513	2700078K21Rik	RIKEN cDNA 2700078K21 gene
219	NA	NA	NA	NA	NA	NA	NA	NA	101540	Prkd2	protein kinase D2
220	1365	NA	1847.67	NA	NA	NA	NA	NA	101543	Wtip	WT1-interacting protein
221	2073	NA	NA	NA	NA	NA	608	0.0284712	101544	Zfp575	zinc finger protein 575
222	2566.33	NA	NA	NA	245.333	0.0037213	NA	NA	101565	6330503K22Rik	RIKEN cDNA 6330503K22 gene
223	4561.67	NA	1408.33	NA	5847.67	NA	2380	NA	101568	Vrk3	vaccinia related kinase 3
224	2999	NA	NA	NA	2398.33	NA	NA	NA	101592	Eftud1	elongation factor Tu GTP binding domain containing 1
225	NA	NA	NA	NA	NA	NA	NA	NA	101602	AI467606	expressed sequence AI467606
226	NA	NA	NA	NA	NA	NA	NA	NA	101604	E430018J23Rik	RIKEN cDNA E430018J23 gene
227	4235.33	NA	5015.33	NA	3885	NA	1994.67	NA	101612	Grwd1	glutamate-rich WD repeat containing 1
228	NA	NA	NA	NA	NA	NA	NA	NA	101613	Nlrp6	NLR family, pyrin domain containing 6
229	NA	NA	2421.67	NA	NA	NA	823.667	0.0551074	101631	Pwwp2b	PWWP domain containing 2B
230	1168.33	0.0880438	NA	NA	NA	NA	NA	NA	101685	Spty2d1	SPT2, Suppressor of Ty, domain containing 1 (S. cerevisiae)
231	1630.67	NA	2232.67	NA	NA	NA	3604.67	NA	101694	AI854517	expressed sequence AI854517
232	703.667	0.0310621	NA	NA	2898.33	NA	NA	NA	101700	Trim68	tripartite motif-containing 68
233	2538	NA	3957.67	NA	2093	NA	NA	NA	101706	Numa1	nuclear mitotic apparatus protein 1
234	1934.33	NA	5166	NA	2690.33	NA	4895	NA	101739	Psip1	PC4 and SFRS1 interacting protein 1
235	NA	NA	NA	NA	NA	NA	NA	NA	101744	C330005M16Rik	RIKEN cDNA C330005M16 gene
236	NA	NA	NA	NA	NA	NA	NA	NA	101772	Ano1	anoctamin 1, calcium activated chloride channel
237	NA	NA	NA	NA	NA	NA	798.333	0.0515324	101809	Spred3	sprouty-related, EVH1 domain containing 3
238	2953.67	NA	2885	NA	3836.67	NA	4983.67	NA	101831	C230052I12Rik	RIKEN cDNA C230052I12 gene
239	3063.33	NA	4376.33	NA	2670.67	NA	4701.33	NA	101861	Ints4	integrator complex subunit 4
240	3266.67	NA	1543	NA	3767.67	NA	5437	NA	101867	1500003O22Rik	RIKEN cDNA 1500003O22 gene
241	NA	NA	2797.67	NA	4826	NA	3331.67	NA	101869	Unc45a	unc-45 homolog A (C. elegans)
242	NA	NA	NA	NA	NA	NA	NA	NA	101883	Tmem149	transmembrane protein 149
243	NA	NA	5612	NA	1630.67	NA	2787	NA	101943	Sf3b3	splicing factor 3b, subunit 3
244	NA	NA	1452.33	NA	4162.33	NA	3231.67	NA	101966	D8Ertd738e	DNA segment, Chr 8, ERATO Doi 738, expressed
245	3286	NA	2612.33	NA	4525	NA	4433	NA	101985	AA960436	expressed sequence AA960436
246	NA	NA	NA	NA	NA	NA	NA	NA	101994	Zfp828	zinc finger protein 828
247	NA	NA	NA	NA	NA	NA	NA	NA	102022	Ces6	carboxylesterase 6
248	4648	NA	2280	NA	2748.33	NA	4732.33	NA	102032	AI316807	expressed sequence AI316807
249	2415.67	NA	6221.33	NA	3504	NA	NA	NA	102058	Exoc8	exocyst complex component 8
250	NA	NA	2298.33	NA	4995	NA	2297.67	NA	102060	Gadd45gip1	growth arrest and DNA-damage-inducible, gamma interacting protein 1
251	NA	NA	NA	NA	NA	NA	NA	NA	102075	Plekhg4	pleckstrin homology domain containing, family G (with RhoGef domain) member 4
252	NA	NA	NA	NA	NA	NA	NA	NA	102084	AI451557	expressed sequence AI451557
253	3476.33	NA	2129	NA	3114.67	NA	NA	NA	102093	Phkb	phosphorylase kinase beta
254	NA	NA	NA	NA	NA	NA	NA	NA	102098	Arhgef18	rho/rac guanine nucleotide exchange factor (GEF) 18
255	3809	NA	3521	NA	462.333	0.0143121	NA	NA	102103	Mtus1	mitochondrial tumor suppressor 1
256	NA	NA	4243.33	NA	3886.33	NA	1400	NA	102115	Dohh	deoxyhypusine hydroxylase/monooxygenase
257	3169.33	NA	5203.33	NA	3286.67	NA	3567	NA	102122	2310065K24Rik	RIKEN cDNA 2310065K24 gene
258	NA	NA	NA	NA	NA	NA	NA	NA	102124	E130303B06Rik	RIKEN cDNA E130303B06 gene
259	1904.67	NA	4936	NA	NA	NA	2202	NA	102141	Snx25	sorting nexin 25
260	2776.33	NA	4169.33	NA	4373.33	NA	3848	NA	102162	Taf5l	TAF5-like RNA polymerase II, p300/CBP-associated factor (PCAF)-associated factor
261	NA	NA	NA	NA	NA	NA	NA	NA	102182	AI931714	expressed sequence AI931714
262	3401.33	NA	4568	NA	3737.67	NA	3516.33	NA	102193	Zdhhc7	zinc finger, DHHC domain containing 7
263	3832.33	NA	2990	NA	5577.67	NA	2587.67	NA	102209	Snapc2	small nuclear RNA activating complex, polypeptide 2
264	2640	NA	NA	NA	2319	NA	3603.33	NA	102247	Agpat6	1-acylglycerol-3-phosphate O-acyltransferase 6 (lysophosphatidic acid acyltransferase, zeta)
265	NA	NA	NA	NA	NA	NA	477.333	0.0169406	102278	Cpne7	copine VII
266	NA	NA	175.333	0.00141706	NA	NA	NA	NA	102294	Cyp4v3	cytochrome P450, family 4, subfamily v, polypeptide 3
267	3318	NA	4717.67	NA	4604	NA	2680	NA	102323	Dcun1d2	DCN1, defective in cullin neddylation 1, domain containing 2 (S. cerevisiae)
268	1428.33	NA	4173.67	NA	NA	NA	NA	NA	102334	Ankrd10	ankyrin repeat domain 10
269	4512.33	NA	5278.33	NA	2414.67	NA	2791.33	NA	102339	Cog4	component of oligomeric golgi complex 4
270	NA	NA	NA	NA	NA	NA	NA	NA	102371	Gcom1	GRINL1A complex locus
271	4087.67	NA	3607.33	NA	3515	NA	3813.33	NA	102414	Clk3	CDC-like kinase 3
272	NA	NA	NA	NA	NA	NA	NA	NA	102423	Mizf	MBD2-interacting zinc finger
273	4837	NA	2763.67	NA	4344	NA	2900.33	NA	102436	Lars2	leucyl-tRNA synthetase, mitochondrial
274	2205	NA	6104	NA	1941	NA	NA	NA	102442	Dennd4a	DENN/MADD domain containing 4A
275	NA	NA	NA	NA	NA	NA	NA	NA	102448	Xylb	xylulokinase homolog (H. influenzae)
276	4032.33	NA	3981.67	NA	2044	NA	4600.33	NA	102462	Imp3	IMP3, U3 small nucleolar ribonucleoprotein, homolog (yeast)
277	NA	NA	NA	NA	NA	NA	NA	NA	102545	Cmtm7	CKLF-like MARVEL transmembrane domain containing 7
278	3678	NA	4128.67	NA	1093	0.0798844	NA	NA	102566	Ano10	anoctamin 10
279	NA	NA	NA	NA	NA	NA	NA	NA	102570	Slc22a13	solute carrier family 22 (organic cation transporter), member 13
280	4156	NA	5218	NA	1598	NA	3828.67	NA	102580	Alg9	asparagine-linked glycosylation 9 homolog (yeast, alpha 1,2 mannosyltransferase)
281	2586.67	NA	513.333	0.0142863	NA	NA	NA	NA	102595	Plekho2	pleckstrin homology domain containing, family O member 2
282	NA	NA	NA	NA	2397.67	NA	NA	NA	102607	Snx19	sorting nexin 19
283	NA	NA	NA	NA	NA	NA	181.333	0.00201575	102614	Rpp25	ribonuclease P 25 subunit (human)
284	NA	NA	126.667	0.000754689	NA	NA	NA	NA	102626	Mapkapk3	mitogen-activated protein kinase-activated protein kinase 3
285	4513.33	NA	2987	NA	2202	NA	4755.33	NA	102632	Acad11	acyl-Coenzyme A dehydrogenase family, member 11
286	NA	NA	63.6667	0.000218347	NA	NA	NA	NA	102644	Oaf	OAF homolog (Drosophila)
287	859	0.0473261	NA	NA	NA	NA	NA	NA	102657	Cd276	CD276 antigen
288	NA	NA	557.667	0.0171395	NA	NA	NA	NA	102680	Slc6a20a	solute carrier family 6 (neurotransmitter transporter), member 20A
289	1923.33	NA	NA	NA	215	0.00284797	NA	NA	102693	Phldb1	pleckstrin homology-like domain, family B, member 1
290	2945.33	NA	NA	NA	4060.33	NA	1574.67	NA	102747	Lrrc49	leucine rich repeat containing 49
291	NA	NA	6022.33	NA	3541.33	NA	1826.33	NA	102774	Bbs4	Bardet-Biedl syndrome 4 (human)
292	4096	NA	1645	NA	3965.67	NA	4763.67	NA	102791	Tcta	T-cell leukemia translocation altered gene
293	3363.33	NA	4556	NA	2357.33	NA	NA	NA	102857	Slc6a8	solute carrier family 6 (neurotransmitter transporter, creatine), member 8
294	2668.67	NA	6648	NA	2742	NA	3055.33	NA	102866	Pls3	plastin 3 (T-isoform)
295	NA	NA	NA	NA	NA	NA	NA	NA	102920	Cenpi	centromere protein I
296	1949	NA	6738.67	NA	NA	NA	1955.33	NA	102941	B630019K06Rik	RIKEN cDNA B630019K06 gene
297	1629	NA	3887.33	NA	5445	NA	NA	NA	102954	Nudt10	nudix (nucleoside diphosphate linked moiety X)-type motif 10
298	NA	NA	NA	NA	NA	NA	NA	NA	102991	AU022751	expressed sequence AU022751
299	1626.33	NA	2362.67	NA	3740	NA	NA	NA	103080	40431	septin 10
300	2162	NA	NA	NA	NA	NA	1390.67	NA	103098	Slc6a15	solute carrier family 6 (neurotransmitter transporter), member 15
301	1458.67	NA	NA	NA	2419	NA	NA	NA	103135	Usp52	ubiquitin specific peptidase 52
302	1738.67	NA	4388.67	NA	3359.67	NA	5135	NA	103136	Pwp1	PWP1 homolog (S. cerevisiae)
303	NA	NA	255.333	0.00311547	NA	NA	NA	NA	103140	Gstt3	glutathione S-transferase, theta 3
304	NA	NA	NA	NA	162	0.0015765	NA	NA	103142	Rdh9	retinol dehydrogenase 9
305	NA	NA	NA	NA	NA	NA	NA	NA	103149	Upb1	ureidopropionase, beta
306	NA	NA	NA	NA	NA	NA	NA	NA	103161	Apof	apolipoprotein F
307	NA	NA	1360.33	NA	NA	NA	1807.67	NA	103172	Chchd10	coiled-coil-helix-coiled-coil-helix domain containing 10
308	NA	NA	NA	NA	NA	NA	NA	NA	103175	D630029K05Rik	RIKEN cDNA D630029K05 gene
309	3063	NA	3587.67	NA	3488	NA	NA	NA	103199	Fig4	FIG4 homolog (S. cerevisiae)
310	NA	NA	NA	NA	NA	NA	NA	NA	103213	Traf3ip2	Traf3 interacting protein 2
311	NA	NA	NA	NA	NA	NA	NA	NA	103220	BC030307	cDNA sequence BC030307
312	NA	NA	4125	NA	NA	NA	NA	NA	103236	Csnk1g2	casein kinase 1, gamma 2
313	1573.33	NA	4313.33	NA	5182.33	NA	3880.33	NA	103266	AI597468	expressed sequence AI597468
314	2016	NA	NA	NA	NA	NA	NA	NA	103268	2410017P07Rik	RIKEN cDNA 2410017P07 gene
315	3087.33	NA	5320.33	NA	2512	NA	4097.67	NA	103284	Zc3h10	zinc finger CCCH type containing 10
316	3039.67	NA	NA	NA	1510.33	NA	NA	NA	103425	Ncln	nicalin homolog (zebrafish)
317	NA	NA	3309.67	NA	NA	NA	1528.33	NA	103466	Nt5dc3	5'-nucleotidase domain containing 3
318	2693.67	NA	5793.67	NA	2369.67	NA	NA	NA	103468	Nup107	nucleoporin 107
319	NA	NA	NA	NA	NA	NA	708	0.0398174	103511	Fam26e	family with sequence similarity 26, member E
320	2641.67	NA	5020.33	NA	NA	NA	NA	NA	103534	Mgat4b	mannoside acetylglucosaminyltransferase 4, isoenzyme B
321	1357.33	NA	5088.67	NA	3841.33	NA	NA	NA	103537	Mbtd1	mbt domain containing 1
322	NA	NA	NA	NA	NA	NA	342.333	0.0081203	103551	E130012A19Rik	RIKEN cDNA E130012A19 gene
323	2539.33	NA	5474	NA	1783.33	NA	NA	NA	103554	Psme4	proteasome (prosome, macropain) activator subunit 4
324	3360	NA	4584.67	NA	4053.33	NA	3275.67	NA	103573	Xpo1	exportin 1, CRM1 homolog (yeast)
325	NA	NA	3280.67	NA	2473.33	NA	NA	NA	103583	Fbxw11	F-box and WD-40 domain protein 11
326	NA	NA	NA	NA	NA	NA	NA	NA	103655	Sec14l4	SEC14-like 4 (S. cerevisiae)
327	NA	NA	NA	NA	1498.33	NA	NA	NA	103677	Smg6	Smg-6 homolog, nonsense mediated mRNA decay factor (C. elegans)
328	5515.33	NA	2047.33	NA	2983	NA	3766.67	NA	103694	Tmed4	transmembrane emp24 protein transport domain containing 4
329	NA	NA	1323.33	0.0965152	2307.33	NA	NA	NA	103710	Slc35e4	solute carrier family 35, member E4
330	NA	NA	NA	NA	NA	NA	795.333	0.0511672	103711	Pnpo	pyridoxine 5'-phosphate oxidase
331	NA	NA	3483.33	NA	NA	NA	1911.67	NA	103712	6330403K07Rik	RIKEN cDNA 6330403K07 gene
332	NA	NA	901.333	0.0462192	NA	NA	NA	NA	103724	Tbc1d10a	TBC1 domain family, member 10a
333	3992.67	NA	3943	NA	4554	NA	2696.67	NA	103733	Tubg1	tubulin, gamma 1
334	2388	NA	2205.33	NA	4273	NA	5362	NA	103737	Pex12	peroxisomal biogenesis factor 12
335	4996.67	NA	2135	NA	4354.67	NA	3206.67	NA	103742	1810046J19Rik	RIKEN cDNA 1810046J19 gene
336	2472.67	NA	4269	NA	360.667	0.00839942	NA	NA	103743	Tmem98	transmembrane protein 98
337	NA	NA	NA	NA	NA	NA	NA	NA	103765	Tmem17	transmembrane protein 17
338	NA	NA	NA	NA	NA	NA	361.667	0.00916219	103768	Tubg2	tubulin, gamma 2
339	NA	NA	NA	NA	NA	NA	NA	NA	103775	Slc25a41	solute carrier family 25, member 41
340	3016.67	NA	3266.33	NA	3224.67	NA	NA	NA	103784	Wdr92	WD repeat domain 92
341	2354.67	NA	NA	NA	1433.67	NA	NA	NA	103806	Maml1	mastermind like 1 (Drosophila)
342	NA	NA	NA	NA	NA	NA	NA	NA	103836	Zfp692	zinc finger protein 692
343	1820.33	NA	2440	NA	3827.67	NA	NA	NA	103841	Cuedc1	CUE domain containing 1
344	NA	NA	845.333	0.0407649	NA	NA	NA	NA	103844	AI842396	expressed sequence AI842396
345	3913.67	NA	3663.33	NA	5371	NA	2076	NA	103850	Nt5m	5',3'-nucleotidase, mitochondrial
346	NA	NA	NA	NA	NA	NA	NA	NA	103889	Hoxb2	homeo box B2
347	NA	NA	4794	NA	2726.67	NA	2228.67	NA	103963	Rpn1	ribophorin I
348	NA	NA	NA	NA	1134.67	0.0857056	NA	NA	103967	Dnm3	dynamin 3
349	2008	NA	897.333	0.0458455	NA	NA	NA	NA	103978	Gpc5	glypican 5
350	NA	NA	NA	NA	NA	NA	NA	NA	103988	Gck	glucokinase
351	2301	NA	NA	NA	NA	NA	1856	NA	104001	Rtn1	reticulon 1
352	NA	NA	NA	NA	NA	NA	NA	NA	104002	Ctsq	cathepsin Q
353	NA	NA	NA	NA	NA	NA	NA	NA	104009	Qsox1	quiescin Q6 sulfhydryl oxidase 1
354	NA	NA	NA	NA	NA	NA	968.667	0.0759058	104010	Cdh22	cadherin 22
355	NA	NA	NA	NA	2414	NA	NA	NA	104015	Synj1	synaptojanin 1
356	NA	NA	NA	NA	NA	NA	NA	NA	104027	Synpo	synaptopodin
357	NA	NA	5842	NA	NA	NA	847	0.0581454	104069	Sncb	synuclein, beta
358	NA	NA	NA	NA	NA	NA	784.667	0.0498013	104079	Nxph3	neurexophilin 3
359	NA	NA	NA	NA	NA	NA	NA	NA	104080	Nxph4	neurexophilin 4
360	NA	NA	6450	NA	2187.33	NA	NA	NA	104082	Wdr7	WD repeat domain 7
361	2599.33	NA	NA	NA	351.667	0.00799647	NA	NA	104086	Cyp27a1	cytochrome P450, family 27, subfamily a, polypeptide 1
362	NA	NA	NA	NA	NA	NA	NA	NA	104099	Itga9	integrin alpha 9
363	NA	NA	NA	NA	NA	NA	NA	NA	104110	Adcy4	adenylate cyclase 4
364	NA	NA	NA	NA	NA	NA	NA	NA	104111	Adcy3	adenylate cyclase 3
365	3310.67	NA	5289.67	NA	2145.33	NA	4173.33	NA	104112	Acly	ATP citrate lyase
366	4768.33	NA	2208	NA	4421.33	NA	3375	NA	104130	Ndufb11	NADH dehydrogenase (ubiquinone) 1 beta subcomplex, 11
367	NA	NA	NA	NA	NA	NA	NA	NA	104156	Etv5	ets variant gene 5
368	NA	NA	NA	NA	NA	NA	NA	NA	104158	Ces3	carboxylesterase 3
369	2924.67	NA	338.333	0.0057796	3819.33	NA	NA	NA	104174	Gldc	glycine decarboxylase
370	2067	NA	2352.67	NA	4773.33	NA	NA	NA	104175	Sbk1	SH3-binding kinase 1
371	NA	NA	NA	NA	NA	NA	NA	NA	104183	Chi3l4	chitinase 3-like 4
372	2368.67	NA	6074	NA	3685.33	NA	3177.33	NA	104184	Blmh	bleomycin hydrolase
373	2642.67	NA	1062.33	0.0636723	4553	NA	NA	NA	104215	Rhoq	ras homolog gene family, member Q
374	NA	NA	NA	NA	NA	NA	NA	NA	104245	Slc6a5	solute carrier family 6 (neurotransmitter transporter, glycine), member 5
375	NA	NA	NA	NA	NA	NA	NA	NA	104248	Cabin1	calcineurin binding protein 1
376	2837	NA	NA	NA	193	0.0022925	NA	NA	104252	Cdc42ep2	CDC42 effector protein (Rho GTPase binding) 2
377	2880.33	NA	4205	NA	3342.33	NA	NA	NA	104263	Jmjd1a	jumonji domain containing 1A
378	NA	NA	NA	NA	NA	NA	NA	NA	104271	Tex15	testis expressed gene 15
379	2084.67	NA	5190.67	NA	3920	NA	3956	NA	104318	Csnk1d	casein kinase 1, delta
380	NA	NA	2981	NA	4607.33	NA	1342.67	NA	104346	Gas8	growth arrest specific 8
381	2535.33	NA	3110	NA	NA	NA	NA	NA	104348	Zfp120	zinc finger protein 120
382	1020	0.0671021	NA	NA	NA	NA	NA	NA	104349	Zfp119	zinc finger protein 119
383	NA	NA	NA	NA	NA	NA	NA	NA	104360	Isl2	insulin related protein 2 (islet 2)
384	NA	NA	570	0.0180129	NA	NA	NA	NA	104362	Meig1	meiosis expressed gene 1
385	NA	NA	NA	NA	NA	NA	NA	NA	104367	Snora65	small nucleolar RNA, H/ACA box 65
386	NA	NA	NA	NA	NA	NA	NA	NA	104382	Barhl2	BarH-like 2 (Drosophila)
387	NA	NA	NA	NA	NA	NA	NA	NA	104383	Rcor2	REST corepressor 2
388	NA	NA	NA	NA	NA	NA	NA	NA	104384	Rhox9	reproductive homeobox 9
389	NA	NA	NA	NA	NA	NA	NA	NA	104394	E2f4	E2F transcription factor 4
390	2600	NA	4887	NA	1342.33	NA	NA	NA	104401	Pcnxl3	pecanex-like 3 (Drosophila)
391	3015	NA	5502.67	NA	4465	NA	2381.33	NA	104416	Bap1	Brca1 associated protein 1
392	NA	NA	6409.67	NA	3083.67	NA	1307.67	NA	104418	Dgkz	diacylglycerol kinase zeta
393	NA	NA	NA	NA	NA	NA	NA	NA	104443	Npffr2	neuropeptide FF receptor 2
394	4018	NA	2571.67	NA	3214	NA	4788.67	NA	104444	Rexo2	REX2, RNA exonuclease 2 homolog (S. cerevisiae)
395	2076.67	NA	4511	NA	636	0.027327	NA	NA	104445	Cdc42ep1	CDC42 effector protein (Rho GTPase binding) 1
396	5108.67	NA	1765	NA	3554.67	NA	4035.67	NA	104457	0610010K14Rik	RIKEN cDNA 0610010K14 gene
397	2980	NA	4943.67	NA	NA	NA	2118.33	NA	104458	Rars	arginyl-tRNA synthetase
398	2228.33	NA	NA	NA	696.667	0.0330101	NA	NA	104479	Ccdc117	coiled-coil domain containing 117
399	3083.67	NA	2179.67	NA	4674	NA	NA	NA	104570	Smek2	SMEK homolog 2, suppressor of mek1 (Dictyostelium)
400	NA	NA	NA	NA	NA	NA	317.333	0.00678303	104582	Rprml	reprimo-like
401	NA	NA	NA	NA	NA	NA	NA	NA	104601	Mycbpap	Mycbp associated protein
402	1870.67	NA	2944.67	NA	NA	NA	NA	NA	104625	Cnot6	CCR4-NOT transcription complex, subunit 6
403	2235	NA	6485	NA	4038.67	NA	2539	NA	104662	Tsr1	TSR1, 20S rRNA accumulation, homolog (yeast)
404	NA	NA	NA	NA	NA	NA	NA	NA	104681	Slc16a6	solute carrier family 16 (monocarboxylic acid transporters), member 6
405	NA	NA	NA	NA	NA	NA	579	0.0255245	104709	Pik3r6	phosphoinositide-3-kinase, regulatory subunit 6
406	NA	NA	NA	NA	3574.33	NA	1627	NA	104718	Ttc7b	tetratricopeptide repeat domain 7B
407	4024.67	NA	5496.33	NA	2660.67	NA	2954.67	NA	104721	Ddx1	DEAD (Asp-Glu-Ala-Asp) box polypeptide 1
408	2027.67	NA	3648	NA	2999.33	NA	5506	NA	104725	1110002B05Rik	RIKEN cDNA 1110002B05 gene
409	NA	NA	NA	NA	NA	NA	NA	NA	104732	4930427A07Rik	RIKEN cDNA 4930427A07 gene
410	NA	NA	NA	NA	NA	NA	NA	NA	104759	Pld4	phospholipase D family, member 4
411	4697.33	NA	2284	NA	4211.67	NA	3590	NA	104771	1200003C05Rik	RIKEN cDNA 1200003C05 gene
412	3292.33	NA	2133.67	NA	2353.67	NA	NA	NA	104776	Aldh6a1	aldehyde dehydrogenase family 6, subfamily A1
413	2864.67	NA	4209	NA	4401.33	NA	3720	NA	104799	AI413782	expressed sequence AI413782
414	NA	NA	NA	NA	NA	NA	NA	NA	104806	Fancm	Fanconi anemia, complementation group M
415	NA	NA	NA	NA	NA	NA	NA	NA	104816	Aspg	asparaginase homolog (S. cerevisiae)
416	NA	NA	NA	NA	NA	NA	NA	NA	104831	Ptpn23	protein tyrosine phosphatase, non-receptor type 23
417	3442.67	NA	4873	NA	3309	NA	3575.33	NA	104836	Cbll1	Casitas B-lineage lymphoma-like 1
418	NA	NA	6238	NA	1421.33	NA	NA	NA	104859	4930573I19Rik	RIKEN cDNA 4930573I19 gene
419	2921.33	NA	NA	NA	3783.67	NA	1471.33	NA	104871	Spata7	spermatogenesis associated 7
420	2637.67	NA	NA	NA	3284.67	NA	4585	NA	104884	Tdp1	tyrosyl-DNA phosphodiesterase 1
421	1280.67	NA	NA	NA	NA	NA	1666	NA	104885	Tmem179	transmembrane protein 179
422	NA	NA	NA	NA	NA	NA	416	0.0124544	104886	Rab15	RAB15, member RAS oncogene family
423	3045.67	NA	1323	0.096483	3237.67	NA	NA	NA	104910	AI132487	expressed sequence AI132487
424	3137	NA	4358.33	NA	689	0.0323198	5490.33	NA	104923	Adi1	acireductone dioxygenase 1
425	NA	NA	NA	NA	NA	NA	NA	NA	104943	Fam110c	family with sequence similarity 110, member C
426	NA	NA	NA	NA	NA	NA	NA	NA	105000	Dnalc1	dynein, axonemal, light chain 1
427	NA	NA	3553.33	NA	NA	NA	1258	NA	105005	Fam84a	family with sequence similarity 84, member A
428	4914	NA	2631.67	NA	4574.33	NA	2641.67	NA	105014	Rdh14	retinol dehydrogenase 14 (all-trans and 9-cis)
429	4665.33	NA	2984.33	NA	4942.67	NA	2221.33	NA	105083	Pelo	pelota homolog (Drosophila)
430	3433.67	NA	6478.33	NA	1224	0.0983834	3557.67	NA	105148	Iars	isoleucine-tRNA synthetase
431	2564	NA	5095.67	NA	371.667	0.00894686	NA	NA	105171	Arrdc3	arrestin domain containing 3
432	4197.33	NA	4256.67	NA	2646.67	NA	3854	NA	105193	Nhlrc1	NHL repeat containing 1
433	3946	NA	4646	NA	2966.67	NA	3548.33	NA	105239	Rnf44	ring finger protein 44
434	4859.33	NA	1221	0.0830232	4641.33	NA	3736	NA	105245	Txndc5	thioredoxin domain containing 5
435	4612	NA	5203.67	NA	3124	NA	2040	NA	105246	Brd9	bromodomain containing 9
436	NA	NA	NA	NA	NA	NA	NA	NA	105278	Ccrk	cell cycle related kinase
437	3611	NA	1945	NA	NA	NA	3092.67	NA	105298	Epdr1	ependymin related protein 1 (zebrafish)
438	NA	NA	NA	NA	NA	NA	NA	NA	105348	Golm1	golgi membrane protein 1
439	NA	NA	NA	NA	NA	NA	315.667	0.00668994	105349	Akr1c18	aldo-keto reductase family 1, member C18
440	2696.33	NA	3889	NA	5335.67	NA	3230	NA	105351	AW209491	expressed sequence AW209491
441	NA	NA	1627.33	NA	4955.67	NA	2358.67	NA	105352	Dusp22	dual specificity phosphatase 22
442	NA	NA	NA	NA	NA	NA	NA	NA	105355	Slc17a3	solute carrier family 17 (sodium phosphate), member 3
443	3280.67	NA	6113	NA	3222.67	NA	2676	NA	105372	Utp15	UTP15, U3 small nucleolar ribonucleoprotein, homolog (yeast)
444	2497.67	NA	NA	NA	4159	NA	1723.33	NA	105377	Ankrd32	ankyrin repeat domain 32
445	NA	NA	NA	NA	NA	NA	NA	NA	105387	Akr1c14	aldo-keto reductase family 1, member C14
446	2143	NA	NA	NA	277.667	0.00473431	NA	NA	105418	E330034G19Rik	RIKEN cDNA E330034G19 gene
447	4041.67	NA	3306	NA	4608	NA	3137.67	NA	105428	Fam149b	family with sequence similarity 149, member B
448	2437.67	NA	NA	NA	167	0.00168566	NA	NA	105439	Slain1	SLAIN motif family, member 1
449	NA	NA	NA	NA	2007.33	NA	NA	NA	105440	Kctd9	potassium channel tetramerisation domain containing 9
450	1123.67	0.0815609	NA	NA	2636	NA	NA	NA	105445	Dock9	dedicator of cytokinesis 9
451	3843	NA	3734.33	NA	2703.33	NA	4518.33	NA	105446	Gmpr2	guanosine monophosphate reductase 2
452	NA	NA	NA	NA	NA	NA	NA	NA	105450	Mmrn2	multimerin 2
453	2931.67	NA	2337	NA	2683.67	NA	NA	NA	105501	Abhd4	abhydrolase domain containing 4
454	2734.67	NA	3200.67	NA	4559.33	NA	NA	NA	105504	Exoc5	exocyst complex component 5
455	NA	NA	NA	NA	NA	NA	NA	NA	105511	Fam170b	family with sequence similarity 170, member B
456	4137	NA	5804.67	NA	1717	NA	3238.33	NA	105513	Chmp7	CHMP family, member 7
457	1348.67	NA	5381	NA	2019	NA	NA	NA	105522	Ankrd28	ankyrin repeat domain 28
458	NA	NA	5934.67	NA	1141.33	0.0866447	2838.33	NA	105559	Mbnl2	muscleblind-like 2
459	NA	NA	NA	NA	NA	NA	NA	NA	105590	AU017455	expressed sequence AU017455
460	NA	NA	NA	NA	NA	NA	NA	NA	105611	AU040096	expressed sequence AU040096
461	4084.33	NA	2856.33	NA	4437	NA	3606.67	NA	105638	Dph3	DPH3 homolog (KTI11, S. cerevisiae)
462	NA	NA	NA	NA	NA	NA	76.3333	0.000366989	105653	Phyhip	phytanoyl-CoA hydroxylase interacting protein
463	4839.67	NA	3523.33	NA	2209.67	NA	4072	NA	105663	Thtpa	thiamine triphosphatase
464	1766.33	NA	1864	NA	NA	NA	4488.33	NA	105670	Rcbtb2	regulator of chromosome condensation (RCC1) and BTB (POZ) domain containing protein 2
465	2718	NA	3789.33	NA	5246	NA	3385.67	NA	105675	Ppif	peptidylprolyl isomerase F (cyclophilin F)
466	NA	NA	NA	NA	NA	NA	NA	NA	105689	Mycbp2	MYC binding protein 2
467	2603.33	NA	2977	NA	NA	NA	NA	NA	105722	Ano6	anoctamin 6
468	NA	NA	5151	NA	NA	NA	913.667	0.0676763	105727	Slc38a1	solute carrier family 38, member 1
469	NA	NA	NA	NA	NA	NA	NA	NA	105732	Fam83h	family with sequence similarity 83, member H
470	NA	NA	NA	NA	NA	NA	NA	NA	105734	Tigd5	tigger transposable element derived 5
471	3283.33	NA	NA	NA	1129	0.0848916	NA	NA	105782	Scrib	scribbled homolog (Drosophila)
472	NA	NA	NA	NA	NA	NA	NA	NA	105785	Kdelr3	KDEL (Lys-Asp-Glu-Leu) endoplasmic reticulum protein retention receptor 3
473	NA	NA	4513	NA	1450.33	NA	NA	NA	105787	Prkaa1	protein kinase, AMP-activated, alpha 1 catalytic subunit
474	NA	NA	453	0.010869	NA	NA	NA	NA	105827	Amigo2	adhesion molecule with Ig like domain 2
475	NA	NA	NA	NA	NA	NA	NA	NA	105833	Ccdc65	coiled-coil domain containing 65
476	3031.33	NA	NA	NA	3432.67	NA	1947.67	NA	105835	Sgsm3	small G protein signaling modulator 3
477	NA	NA	NA	NA	NA	NA	NA	NA	105837	Mtbp	Mdm2, transformed 3T3 cell double minute p53 binding protein
478	NA	NA	NA	NA	NA	NA	NA	NA	105841	Dennd3	DENN/MADD domain containing 3
479	NA	NA	NA	NA	NA	NA	NA	NA	105844	Card10	caspase recruitment domain family, member 10
480	3895.67	NA	2211.33	NA	1842	NA	NA	NA	105847	Lmf2	lipase maturation factor 2
481	NA	NA	NA	NA	NA	NA	491.333	0.0180201	105853	Mal2	mal, T-cell differentiation protein 2
482	NA	NA	NA	NA	NA	NA	NA	NA	105855	Nckap1l	NCK associated protein 1 like
483	NA	NA	630	0.0221058	NA	NA	2222.67	NA	105859	Csdc2	cold shock domain containing C2, RNA binding
484	NA	NA	NA	NA	NA	NA	NA	NA	105866	Krt72	keratin 72
485	NA	NA	NA	NA	NA	NA	NA	NA	105892	9030619P08Rik	RIKEN cDNA 9030619P08 gene
486	NA	NA	NA	NA	NA	NA	NA	NA	105988	Espl1	extra spindle poles-like 1 (S. cerevisiae)
487	2846.33	NA	2975.33	NA	NA	NA	NA	NA	106014	Fam19a5	family with sequence similarity 19, member A5
488	2338.67	NA	4487.33	NA	2129.33	NA	NA	NA	106021	Topors	topoisomerase I binding, arginine/serine-rich
489	3740.33	NA	4272.33	NA	4737.33	NA	2491.33	NA	106025	Sharpin	SHANK-associated RH domain interacting protein
490	5089.33	NA	3287.33	NA	3285	NA	3122	NA	106039	Gga1	golgi associated, gamma adaptin ear containing, ARF binding protein 1
491	3569	NA	NA	NA	937.333	0.0596147	3046.33	NA	106042	Prickle1	prickle like 1 (Drosophila)
492	3707	NA	2015	NA	3472	NA	5150.67	NA	106052	Fbxo4	F-box protein 4
493	2513	NA	4703.33	NA	2227.67	NA	NA	NA	106064	AW549877	expressed sequence AW549877
494	NA	NA	NA	NA	NA	NA	NA	NA	106068	Slc45a4	solute carrier family 45, member 4
495	4942.67	NA	3483	NA	2819.33	NA	3539.67	NA	106073	Mfsd5	major facilitator superfamily domain containing 5
496	2829.33	NA	3354.33	NA	5476	NA	3403	NA	106143	Cggbp1	CGG triplet repeat binding protein 1
497	NA	NA	NA	NA	NA	NA	NA	NA	106200	Txndc11	thioredoxin domain containing 11
498	NA	NA	NA	NA	NA	NA	NA	NA	106205	Zc3h7a	zinc finger CCCH type containing 7 A
499	NA	NA	NA	NA	NA	NA	NA	NA	106248	Qtrtd1	queuine tRNA-ribosyltransferase domain containing 1
500	4401.67	NA	2311.33	NA	5694.33	NA	2209.33	NA	106264	0610012G03Rik	RIKEN cDNA 0610012G03 gene
501	2264.67	NA	5830.67	NA	3338.67	NA	3757	NA	106298	Rrn3	RRN3 RNA polymerase I transcription factor homolog (yeast)
502	2662	NA	3748	NA	3812.67	NA	NA	NA	106326	Osbpl11	oxysterol binding protein-like 11
503	NA	NA	1597	NA	4468.67	NA	NA	NA	106338	Nsun3	NOL1/NOP2/Sun domain family member 3
504	1829.33	NA	5650	NA	3820.67	NA	3845	NA	106344	Rfc4	replication factor C (activator 1) 4
505	NA	NA	NA	NA	NA	NA	NA	NA	106347	Ildr1	immunoglobulin-like domain containing receptor 1
506	NA	NA	NA	NA	NA	NA	NA	NA	106369	Ypel1	yippee-like 1 (Drosophila)
507	NA	NA	NA	NA	NA	NA	NA	NA	106389	Eaf2	ELL associated factor 2
508	3230	NA	2668.33	NA	NA	NA	1793	NA	106393	Srl	sarcalumenin
509	NA	NA	NA	NA	NA	NA	NA	NA	106407	Osta	organic solute transporter alpha
510	1889.67	NA	2235.67	NA	4196	NA	NA	NA	106504	Stk38	serine/threonine kinase 38
511	NA	NA	NA	NA	NA	NA	NA	NA	106512	Gpsm3	G-protein signalling modulator 3 (AGS3-like, C. elegans)
512	536.333	0.0174364	NA	NA	NA	NA	NA	NA	106522	Pkdcc	protein kinase domain containing, cytoplasmic
513	NA	NA	3532	NA	2796.67	NA	2744.67	NA	106529	Gpsn2	glycoprotein, synaptic 2
514	NA	NA	NA	NA	NA	NA	NA	NA	106557	Ldhal6b	lactate dehydrogenase A-like 6B
515	4667.33	NA	3431	NA	4180.33	NA	2705.67	NA	106564	Ppcs	phosphopantothenoylcysteine synthetase
516	NA	NA	NA	NA	NA	NA	NA	NA	106565	Dlk2	delta-like 2 homolog (Drosophila)
517	1598.33	NA	3438.67	NA	3044	NA	NA	NA	106572	Rab31	RAB31, member RAS oncogene family
518	3648.33	NA	2574.33	NA	1283	NA	NA	NA	106581	Itfg3	integrin alpha FG-GAP repeat containing 3
519	NA	NA	NA	NA	NA	NA	NA	NA	106582	Nrm	nurim (nuclear envelope membrane protein)
520	2764	NA	4005.67	NA	3552.67	NA	NA	NA	106583	Rbm16	RNA binding motif protein 16
521	2158.33	NA	5389	NA	NA	NA	NA	NA	106585	Ankrd12	ankyrin repeat domain 12
522	NA	NA	NA	NA	NA	NA	NA	NA	106618	Wdr90	WD repeat domain 90
523	NA	NA	NA	NA	NA	NA	NA	NA	106628	Trip10	thyroid hormone receptor interactor 10
524	1731	NA	4454.67	NA	3719	NA	NA	NA	106633	Ift140	intraflagellar transport 140 homolog (Chlamydomonas)
525	2411.33	NA	2667.33	NA	2732	NA	NA	NA	106639	AI662250	expressed sequence AI662250
526	NA	NA	46.3333	0.000112837	NA	NA	NA	NA	106648	Cyp4f15	cytochrome P450, family 4, subfamily f, polypeptide 15
527	NA	NA	1024	0.0593464	4170.33	NA	2342	NA	106672	AI413582	expressed sequence AI413582
528	NA	NA	3676.33	NA	NA	NA	925.333	0.06942	106707	Rpusd1	RNA pseudouridylate synthase domain containing 1
529	NA	NA	NA	NA	NA	NA	NA	NA	106757	Tmem146	transmembrane protein 146
530	1412.67	NA	NA	NA	NA	NA	NA	NA	106759	Ticam1	toll-like receptor adaptor molecule 1
531	NA	NA	NA	NA	NA	NA	NA	NA	106763	Ttbk1	tau tubulin kinase 1
532	NA	NA	NA	NA	NA	NA	NA	NA	106766	Stap2	signal transducing adaptor family member 2
533	NA	NA	NA	NA	2887	NA	NA	NA	106794	Dhx57	DEAH (Asp-Glu-Ala-Asp/His) box polypeptide 57
534	1976.67	NA	NA	NA	NA	NA	1319.33	NA	106795	Tcf19	transcription factor 19
535	4062.33	NA	2448.67	NA	2161.33	NA	5359.67	NA	106821	AI314976	expressed sequence AI314976
536	2002.67	NA	2462	NA	4750.67	NA	NA	NA	106840	Unc119b	unc-119 homolog B (C. elegans)
537	3804	NA	920.667	0.0483221	3274	NA	NA	NA	106861	Abhd3	abhydrolase domain containing 3
538	2224.33	NA	281	0.00379689	NA	NA	NA	NA	106869	Tnfaip8	tumor necrosis factor, alpha-induced protein 8
539	3656.67	NA	NA	NA	822.333	0.0461005	3039.67	NA	106877	Afap1l1	actin filament associated protein 1-like 1
540	NA	NA	47.3333	0.000123095	NA	NA	NA	NA	106878	2010002N04Rik	RIKEN cDNA 2010002N04 gene
541	2915	NA	5445.33	NA	2248.67	NA	4303	NA	106894	Hmgxb3	HMG box domain containing 3
542	NA	NA	2202.33	NA	NA	NA	1651.33	NA	106931	Kctd1	potassium channel tetramerisation domain containing 1
543	4506.67	NA	3589	NA	3140	NA	3693.67	NA	106947	Slc39a3	solute carrier family 39 (zinc transporter), member 3
544	NA	NA	NA	NA	NA	NA	NA	NA	106952	Arap3	ArfGAP with RhoGAP domain, ankyrin repeat and PH domain 3
545	3093.33	NA	4178.67	NA	4183.33	NA	3735.33	NA	106957	Slc39a6	solute carrier family 39 (metal ion transporter), member 6
546	3522.33	NA	851	0.0413262	2749	NA	NA	NA	107022	Gramd3	GRAM domain containing 3
547	2824	NA	5257.67	NA	1248.67	NA	4988.67	NA	107029	Me2	malic enzyme 2, NAD(+)-dependent, mitochondrial
548	2775	NA	5972.67	NA	1719.67	NA	NA	NA	107035	Fbxo38	F-box protein 38
549	3756.33	NA	5986	NA	2346.33	NA	3017.33	NA	107045	Lars	leucyl-tRNA synthetase
550	3401.67	NA	2967	NA	4076	NA	4450.33	NA	107047	Psmg2	proteasome (prosome, macropain) assembly chaperone 2
551	714.333	0.0320309	NA	NA	NA	NA	NA	NA	107065	Lrrtm2	leucine rich repeat transmembrane neuronal 2
552	5135	NA	4389.67	NA	2594	NA	2655.33	NA	107071	Wdr74	WD repeat domain 74
553	NA	NA	NA	NA	2207	NA	3052.67	NA	107094	Rrp12	ribosomal RNA processing 12 homolog (S. cerevisiae)
554	NA	NA	NA	NA	NA	NA	NA	NA	107141	Cyp2c50	cytochrome P450, family 2, subfamily c, polypeptide 50
555	NA	NA	NA	NA	NA	NA	NA	NA	107146	Glyat	glycine-N-acyltransferase
556	NA	NA	4813.67	NA	3909.67	NA	2126.67	NA	107173	Gpr137	G protein-coupled receptor 137
557	NA	NA	5321	NA	NA	NA	NA	NA	107182	Btaf1	BTAF1 RNA polymerase II, B-TFIID transcription factor-associated, (Mot1 homolog, S. cerevisiae)
558	4986.33	NA	1611	NA	4553	NA	3425	NA	107197	AI462493	expressed sequence AI462493
559	NA	NA	NA	NA	NA	NA	NA	NA	107221	Gpr120	G protein-coupled receptor 120
560	NA	NA	2569	NA	1735.67	NA	3681.67	NA	107227	Macrod1	MACRO domain containing 1
561	3403.67	NA	NA	NA	617	0.025659	NA	NA	107239	Atpgd1	ATP-grasp domain containing 1
562	4375	NA	3934	NA	4520.67	NA	2239.67	NA	107242	AI837181	expressed sequence AI837181
563	1606	NA	NA	NA	NA	NA	1447.67	NA	107250	Kazald1	Kazal-type serine peptidase inhibitor domain 1
564	NA	NA	3155.33	NA	2475.33	NA	NA	NA	107260	Otub1	OTU domain, ubiquitin aldehyde binding 1
565	2946.33	NA	5689.67	NA	4366.33	NA	2368.67	NA	107271	Yars	tyrosyl-tRNA synthetase
566	3757.67	NA	2712	NA	1226.67	0.0988072	NA	NA	107272	Psat1	phosphoserine aminotransferase 1
567	4060.67	NA	4642.67	NA	1457.67	NA	4440	NA	107305	Vps37c	vacuolar protein sorting 37C (yeast)
568	NA	NA	NA	NA	NA	NA	NA	NA	107321	Lpxn	leupaxin
569	5088	NA	1246	0.0862529	4677	NA	3397.33	NA	107328	Trpt1	tRNA phosphotransferase 1
570	2055	NA	NA	NA	2376	NA	NA	NA	107338	Gbf1	golgi-specific brefeldin A-resistance factor 1
571	NA	NA	NA	NA	NA	NA	NA	NA	107350	AW112010	expressed sequence AW112010
572	542.667	0.0178029	NA	NA	NA	NA	NA	NA	107351	Kank1	KN motif and ankyrin repeat domains 1
573	3072	NA	5109.67	NA	1729.67	NA	4711.67	NA	107358	Tm9sf3	transmembrane 9 superfamily member 3
574	NA	NA	NA	NA	2230.33	NA	NA	NA	107371	Exoc6	exocyst complex component 6
575	226	0.00262131	NA	NA	NA	NA	NA	NA	107373	4632417K18Rik	RIKEN cDNA 4632417K18 gene
576	NA	NA	1123.33	0.071039	1902	NA	NA	NA	107375	Slc25a45	solute carrier family 25, member 45
577	5077	NA	4680.33	NA	2436.67	NA	2585	NA	107392	Brms1	breast cancer metastasis-suppressor 1
578	2960	NA	5825.33	NA	2287	NA	3941	NA	107435	Hat1	histone aminotransferase 1
579	NA	NA	NA	NA	NA	NA	228	0.00341389	107448	Unc5a	unc-5 homolog A (C. elegans)
580	2392.67	NA	NA	NA	100.667	0.00067266	NA	NA	107449	Unc5b	unc-5 homolog B (C. elegans)
581	NA	NA	NA	NA	NA	NA	NA	NA	107459
582	NA	NA	NA	NA	NA	NA	600.333	0.027705	107477	Guca1b	guanylate cyclase activator 1B
583	NA	NA	NA	NA	2664.67	NA	NA	NA	107503	Atf5	activating transcription factor 5
584	2005.67	NA	5665.67	NA	2324.33	NA	4690.33	NA	107508	Eprs	glutamyl-prolyl-tRNA synthetase
585	3962.67	NA	4794.33	NA	3233.33	NA	3191.67	NA	107513	Ssr1	signal sequence receptor, alpha
586	NA	NA	663.333	0.0246644	3620	NA	NA	NA	107515	Lgr4	leucine-rich repeat-containing G protein-coupled receptor 4
587	NA	NA	NA	NA	NA	NA	NA	NA	107522	Ece2	endothelin converting enzyme 2
588	NA	NA	NA	NA	NA	NA	NA	NA	107526	Gimap4	GTPase, IMAP family member 4
589	NA	NA	NA	NA	NA	NA	NA	NA	107527	Il1rl2	interleukin 1 receptor-like 2
590	NA	NA	NA	NA	NA	NA	1645	NA	107528	Magee1	melanoma antigen, family E, 1
591	1138.67	0.0836614	4410	NA	3768	NA	5159	NA	107566	Arl2bp	ADP-ribosylation factor-like 2 binding protein
592	3418.67	NA	2787.67	NA	3824	NA	NA	NA	107568	Wwp1	WW domain containing E3 ubiquitin protein ligase 1
593	4086	NA	6212	NA	2343.33	NA	2361.67	NA	107569	Nt5c3	5'-nucleotidase, cytosolic III
594	2800.33	NA	3408	NA	3454	NA	NA	NA	107581	Col16a1	collagen, type XVI, alpha 1
595	NA	NA	NA	NA	NA	NA	474.667	0.0167347	107586	Ovol2	ovo-like 2 (Drosophila)
596	NA	NA	NA	NA	NA	NA	NA	NA	107587	Osr2	odd-skipped related 2 (Drosophila)
597	NA	NA	NA	NA	NA	NA	NA	NA	107589	Mylk	myosin, light polypeptide kinase
598	NA	NA	NA	NA	NA	NA	NA	NA	107605	Rdh1	retinol dehydrogenase 1 (all trans)
599	NA	NA	NA	NA	138.667	0.00120244	NA	NA	107607	Nod1	nucleotide-binding oligomerization domain containing 1
600	3200.67	NA	2839.33	NA	5293	NA	3668	NA	107650	Pi4kb	phosphatidylinositol 4-kinase, catalytic, beta polypeptide
601	4256.67	NA	5720.33	NA	2356.67	NA	2705.33	NA	107652	Uap1	UDP-N-acetylglucosamine pyrophosphorylase 1
602	NA	NA	NA	NA	NA	NA	1026.67	0.0846634	107684	Coro2a	coronin, actin binding protein 2A
603	5141.67	NA	2954.67	NA	1880	NA	4386	NA	107702	Rnh1	ribonuclease/angiogenin inhibitor 1
604	3364.33	NA	6656.67	NA	2554.67	NA	NA	NA	107723	Slc12a6	solute carrier family 12, member 6
605	5258.67	NA	3230	NA	3039.33	NA	3150	NA	107732	Mrpl10	mitochondrial ribosomal protein L10
606	NA	NA	NA	NA	NA	NA	NA	NA	107733	Mrpl41	mitochondrial ribosomal protein L41
607	4487	NA	2097.33	NA	5380	NA	2792.67	NA	107734	Mrpl30	mitochondrial ribosomal protein L30
608	725.667	0.0331982	NA	NA	NA	NA	NA	NA	107746	Rapgef1	Rap guanine nucleotide exchange factor (GEF) 1
609	NA	NA	576	0.0184174	3830.67	NA	NA	NA	107747	Aldh1l1	aldehyde dehydrogenase 1 family, member L1
610	NA	NA	NA	NA	NA	NA	NA	NA	107753	Lgals2	lectin, galactose-binding, soluble 2
611	NA	NA	NA	NA	NA	NA	NA	NA	107765	Ankrd1	ankyrin repeat domain 1 (cardiac muscle)
612	NA	NA	NA	NA	NA	NA	NA	NA	107766	Haao	3-hydroxyanthranilate 3,4-dioxygenase
613	NA	NA	5941.33	NA	3732.33	NA	1459	NA	107767	Scamp1	secretory carrier membrane protein 1
614	NA	NA	NA	NA	NA	NA	1131.67	NA	107769	Tm6sf1	transmembrane 6 superfamily member 1
615	NA	NA	NA	NA	NA	NA	NA	NA	107770	Tm6sf2	transmembrane 6 superfamily member 2
616	NA	NA	658	0.0242204	NA	NA	2031.33	NA	107771	Bmyc	brain expressed myelocytomatosis oncogene
617	NA	NA	NA	NA	NA	NA	NA	NA	107815	Scml2	sex comb on midleg-like 2 (Drosophila)
618	3450.67	NA	5469.67	NA	2429	NA	3718.67	NA	107817	Jmjd6	jumonji domain containing 6
619	NA	NA	NA	NA	NA	NA	NA	NA	107823	Whsc1	Wolf-Hirschhorn syndrome candidate 1 (human)
620	3808.67	NA	6075.33	NA	1417	NA	3511	NA	107829	Thoc5	THO complex 5
621	NA	NA	3329.33	NA	NA	NA	1509.33	NA	107831	Bai1	brain-specific angiogenesis inhibitor 1
622	NA	NA	NA	NA	NA	NA	NA	NA	107868	Usp9y	ubiquitin specific peptidase 9, Y chromosome
623	NA	NA	104.667	0.000524619	2458.33	NA	NA	NA	107869	Cth	cystathionase (cystathionine gamma-lyase)
624	NA	NA	NA	NA	NA	NA	NA	NA	107889	Gcm2	glial cells missing homolog 2 (Drosophila)
625	4444	NA	3672	NA	2417.33	NA	NA	NA	107932	Chd4	chromodomain helicase DNA binding protein 4
626	NA	NA	NA	NA	NA	NA	579.667	0.025589	107934	Celsr3	cadherin, EGF LAG seven-pass G-type receptor 3 (flamingo homolog, Drosophila)
627	3648.33	NA	6225.67	NA	2577.33	NA	2705.67	NA	107939	Pom121	nuclear pore membrane protein 121
628	NA	NA	NA	NA	NA	NA	NA	NA	107970	Hist1h1t	histone cluster 1, H1t
629	NA	NA	NA	NA	1823	NA	1567.33	NA	107971	Frs3	fibroblast growth factor receptor substrate 3
630	2851.33	NA	5267.33	NA	NA	NA	2098.67	NA	107975	Pacs1	phosphofurin acidic cluster sorting protein 1
631	3768	NA	4222	NA	2812.67	NA	4150	NA	107976	Bre	brain and reproductive organ-expressed protein
632	NA	NA	NA	NA	2435.67	NA	NA	NA	107986	Ddb2	damage specific DNA binding protein 2
633	1832.67	NA	NA	NA	479.333	0.0154423	NA	NA	107993	Bfsp2	beaded filament structural protein 2, phakinin
634	774.667	0.0379691	NA	NA	3183.33	NA	3582.33	NA	107995	Cdc20	cell division cycle 20 homolog (S. cerevisiae)
635	NA	NA	NA	NA	1704.67	NA	1456.33	NA	107999	Gtpbp6	GTP binding protein 6 (putative)
636	NA	NA	NA	NA	NA	NA	NA	NA	108000	Cenpf	centromere protein F
637	NA	NA	NA	NA	1850.67	NA	NA	NA	108011	Ap4e1	adaptor-related protein complex AP-4, epsilon 1
638	NA	NA	NA	NA	NA	NA	NA	NA	108012	Ap1s2	adaptor-related protein complex 1, sigma 2 subunit
639	NA	NA	NA	NA	NA	NA	NA	NA	108013	Brunol4	bruno-like 4, RNA binding protein (Drosophila)
640	3530.33	NA	1939.67	NA	3347.67	NA	5349	NA	108014	Sfrs9	splicing factor, arginine/serine rich 9
641	NA	NA	NA	NA	NA	NA	NA	NA	108015	Chrnb4	cholinergic receptor, nicotinic, beta polypeptide 4
642	NA	NA	NA	NA	NA	NA	NA	NA	108017	Fxyd4	FXYD domain-containing ion transport regulator 4
643	NA	NA	NA	NA	NA	NA	NA	NA	108022	Igk-V19-15	immunoglobulin kappa chain variable 19 (V19)-15
644	NA	NA	NA	NA	NA	NA	NA	NA	108030	Lin7a	lin-7 homolog A (C. elegans)
645	4008.67	NA	3021.33	NA	2195	NA	NA	NA	108037	Shmt2	serine hydroxymethyltransferase 2 (mitochondrial)
646	NA	NA	NA	NA	NA	NA	NA	NA	108043	Chrnb3	cholinergic receptor, nicotinic, beta polypeptide 3
647	NA	NA	176.333	0.00143611	NA	NA	NA	NA	108052	Slc14a1	solute carrier family 14 (urea transporter), member 1
648	NA	NA	NA	NA	NA	NA	NA	NA	108058	Camk2d	calcium/calmodulin-dependent protein kinase II, delta
649	2012	NA	4375.33	NA	5842.67	NA	2729.33	NA	108062	Cstf2	cleavage stimulation factor, 3' pre-RNA subunit 2
650	4201	NA	5511.67	NA	1066	0.0763236	3830.33	NA	108067	Eif2b3	eukaryotic translation initiation factor 2B, subunit 3
651	NA	NA	NA	NA	NA	NA	434	0.0137487	108068	Grm2	glutamate receptor, metabotropic 2
652	NA	NA	1523.67	NA	2028	NA	NA	NA	108069	Grm3	glutamate receptor, metabotropic 3
653	NA	NA	NA	NA	NA	NA	NA	NA	108071	Grm5	glutamate receptor, metabotropic 5
654	NA	NA	NA	NA	NA	NA	818.333	0.0543967	108073	Grm7	glutamate receptor, metabotropic 7
655	NA	NA	NA	NA	NA	NA	NA	NA	108075	Ltbp4	latent transforming growth factor beta binding protein 4
656	NA	NA	NA	NA	NA	NA	NA	NA	108077	Skiv2l	superkiller viralicidic activity 2-like (S. cerevisiae)
657	NA	NA	NA	NA	NA	NA	NA	NA	108078	Olr1	oxidized low density lipoprotein (lectin-like) receptor 1
658	NA	NA	NA	NA	NA	NA	NA	NA	108079	Prkaa2	protein kinase, AMP-activated, alpha 2 catalytic subunit
659	NA	NA	5414.33	NA	NA	NA	1773.67	NA	108083	Pip4k2b	phosphatidylinositol-5-phosphate 4-kinase, type II, beta
660	1687.67	NA	NA	NA	2319	NA	NA	NA	108086	Rnf216	ring finger protein 216
661	1811.33	NA	2516	NA	4393.33	NA	NA	NA	108089	Rnf144a	ring finger protein 144A
662	NA	NA	NA	NA	NA	NA	NA	NA	108096	Slco1a5	solute carrier organic anion transporter family, member 1a5
663	NA	NA	NA	NA	NA	NA	NA	NA	108097	Prkab2	protein kinase, AMP-activated, beta 2 non-catalytic subunit
664	5016	NA	3074.67	NA	2775.33	NA	3811.67	NA	108098	Med21	mediator complex subunit 21
665	NA	NA	2991.33	NA	NA	NA	2581	NA	108099	Prkag2	protein kinase, AMP-activated, gamma 2 non-catalytic subunit
666	NA	NA	NA	NA	NA	NA	169.667	0.00174006	108100	Baiap2	brain-specific angiogenesis inhibitor 1-associated protein 2
667	NA	NA	NA	NA	NA	NA	NA	NA	108101	Fermt3	fermitin family homolog 3 (Drosophila)
668	NA	NA	NA	NA	NA	NA	NA	NA	108105	B3gnt5	UDP-GlcNAc:betaGal beta-1,3-N-acetylglucosaminyltransferase 5
669	NA	NA	2768	NA	NA	NA	NA	NA	108112	Eif4ebp3	eukaryotic translation initiation factor 4E binding protein 3
670	NA	NA	NA	NA	NA	NA	NA	NA	108114	Slc22a7	solute carrier family 22 (organic anion transporter), member 7
671	NA	NA	NA	NA	NA	NA	NA	NA	108115	Slco4a1	solute carrier organic anion transporter family, member 4a1
672	3287	NA	NA	NA	633	0.0270364	NA	NA	108116	Slco3a1	solute carrier organic anion transporter family, member 3a1
673	NA	NA	6306.33	NA	NA	NA	1200	NA	108123	Napg	N-ethylmaleimide sensitive fusion protein attachment protein gamma
674	NA	NA	4063	NA	3932.67	NA	1686.67	NA	108124	Napa	N-ethylmaleimide sensitive fusion protein attachment protein alpha
675	3439	NA	2685.67	NA	3362.67	NA	5064.67	NA	108138	Xrcc4	X-ray repair complementing defective repair in Chinese hamster cells 4
676	3535.33	NA	1736	NA	NA	NA	3161.67	NA	108143	Taf9	TAF9 RNA polymerase II, TATA box binding protein (TBP)-associated factor
677	2086.67	NA	2889	NA	4890	NA	NA	NA	108147	Atic	5-aminoimidazole-4-carboxamide ribonucleotide formyltransferase/IMP cyclohydrolase
678	3858.67	NA	3726.67	NA	2569	NA	4600.33	NA	108148	Galnt2	UDP-N-acetyl-alpha-D-galactosamine:polypeptide N-acetylgalactosaminyltransferase 2
679	NA	NA	NA	NA	NA	NA	NA	NA	108150	Galnt7	UDP-N-acetyl-alpha-D-galactosamine: polypeptide N-acetylgalactosaminyltransferase 7
680	NA	NA	NA	NA	NA	NA	NA	NA	108151	Sema3d	sema domain, immunoglobulin domain (Ig), short basic domain, secreted, (semaphorin) 3D
681	NA	NA	NA	NA	NA	NA	NA	NA	108153	Adamts7	a disintegrin-like and metallopeptidase (reprolysin type) with thrombospondin type 1 motif, 7
682	NA	NA	2668.33	NA	NA	NA	NA	NA	108155	Ogt	O-linked N-acetylglucosamine (GlcNAc) transferase (UDP-N-acetylglucosamine:polypeptide-N-acetylglucosaminyl transferase)
683	3034	NA	2873.33	NA	3601	NA	5088	NA	108156	Mthfd1	methylenetetrahydrofolate dehydrogenase (NADP+ dependent), methenyltetrahydrofolate cyclohydrolase, formyltetrahydrofolate synthase
684	NA	NA	NA	NA	1276.33	NA	NA	NA	108159	Ubxn8	UBX domain protein 8
685	3529.67	NA	3307	NA	2695.33	NA	5033	NA	108160	Fam50a	family with sequence similarity 50, member A
686	528	0.0168578	NA	NA	NA	NA	NA	NA	108176	Npm3-ps1	nucleoplasmin 3, pseudogene 1
687	NA	NA	4233.33	NA	2733.33	NA	1995.67	NA	108645	Mat2b	methionine adenosyltransferase II, beta
688	3414.67	NA	5346	NA	3641	NA	2910.67	NA	108652	Slc35b3	solute carrier family 35, member B3
689	2080	NA	1089	0.0668948	NA	NA	NA	NA	108653	Rimklb	ribosomal modification protein rimK-like family member B
690	2375	NA	4970	NA	4305.33	NA	3603.33	NA	108654	4933403F05Rik	RIKEN cDNA 4933403F05 gene
691	NA	NA	NA	NA	NA	NA	677.333	0.036067	108655	Foxp1	forkhead box P1
692	2789.33	NA	3738.33	NA	1899.33	NA	NA	NA	108657	Rnpepl1	arginyl aminopeptidase (aminopeptidase B)-like 1
693	3572	NA	5697	NA	3702.33	NA	2338.67	NA	108660	Rnf187	ring finger protein 187
694	NA	NA	5559.67	NA	3186.67	NA	1984.67	NA	108664	Atp6v1h	ATPase, H+ transporting, lysosomal V1 subunit H
695	NA	NA	NA	NA	NA	NA	NA	NA	108670	Epsti1	epithelial stromal interaction 1 (breast)
696	NA	NA	NA	NA	NA	NA	NA	NA	108672	Zdhhc15	zinc finger, DHHC domain containing 15
697	2737	NA	4418	NA	2579.67	NA	4963	NA	108673	Ccdc86	coiled-coil domain containing 86
698	NA	NA	3106.33	NA	4259.67	NA	2173	NA	108679	Cops8	COP9 (constitutive photomorphogenic) homolog, subunit 8 (Arabidopsis thaliana)
699	1141.67	0.0840567	4075	NA	3608.67	NA	NA	NA	108682	Gpt2	glutamic pyruvate transaminase (alanine aminotransferase) 2
700	1956.67	NA	2235.33	NA	NA	NA	NA	NA	108686	Ccdc88a	coiled coil domain containing 88A
701	3676	NA	NA	NA	542.333	0.01987	NA	NA	108687	Edem2	ER degradation enhancer, mannosidase alpha-like 2
702	NA	NA	NA	NA	476.333	0.015224	NA	NA	108689	Obfc1	oligonucleotide/oligosaccharide-binding fold containing 1
703	NA	NA	6320.33	NA	NA	NA	487.667	0.017773	108699	Chn1	chimerin (chimaerin) 1
704	3305.67	NA	788.667	0.0353751	3513.33	NA	NA	NA	108705	Pttg1ip	pituitary tumor-transforming 1 interacting protein
705	2751.33	NA	4470.67	NA	4489.33	NA	3530.33	NA	108707	1810008A18Rik	RIKEN cDNA 1810008A18 gene
706	NA	NA	NA	NA	NA	NA	NA	NA	108723	Card11	caspase recruitment domain family, member 11
707	NA	NA	987.333	0.0551744	1704	NA	NA	NA	108735	Sft2d2	SFT2 domain containing 2
708	3919	NA	2269.67	NA	5399.33	NA	3308.33	NA	108755	Lyrm2	LYR motif containing 2
709	4178	NA	5067.33	NA	2627.67	NA	3208	NA	108760	Galntl1	UDP-N-acetyl-alpha-D-galactosamine:polypeptide N-acetylgalactosaminyltransferase-like 1
710	4848.67	NA	3533.67	NA	1898	NA	4271	NA	108767	Pnrc1	proline-rich nuclear receptor coactivator 1
711	1009.67	0.0657788	NA	NA	3028	NA	NA	NA	108797	Mex3b	mex3 homolog B (C. elegans)
712	NA	NA	NA	NA	NA	NA	NA	NA	108800	Ston2	stonin 2
713	3629.67	NA	590	0.0193977	NA	NA	3014.67	NA	108811	Ccdc122	coiled-coil domain containing 122
714	NA	NA	NA	NA	NA	NA	NA	NA	108812	Als2cr12	amyotrophic lateral sclerosis 2 (juvenile) chromosome region, candidate 12 (human)
715	1628	NA	5638.33	NA	2210.67	NA	NA	NA	108829	Jmjd1c	jumonji domain containing 1C
716	NA	NA	NA	NA	NA	NA	601	0.0277784	108832	5430405G05Rik	RIKEN cDNA 5430405G05 gene
717	2486.33	NA	NA	NA	1658.67	NA	NA	NA	108837	Ibtk	inhibitor of Bruton agammaglobulinemia tyrosine kinase
718	NA	NA	1900.33	NA	NA	NA	2560.67	NA	108841	Rdh13	retinol dehydrogenase 13 (all-trans and 9-cis)
719	3897.67	NA	1518	NA	3257.67	NA	NA	NA	108853	Mtrf1l	mitochondrial translational release factor 1-like
720	2963	NA	3745	NA	5315.67	NA	3138.33	NA	108888	Atad3a	ATPase family, AAA domain containing 3A
721	3478.67	NA	3158.67	NA	832	0.0471328	NA	NA	108897	Aif1l	allograft inflammatory factor 1-like
722	976.333	0.0615134	3666.67	NA	NA	NA	4002.33	NA	108899	2700081O15Rik	RIKEN cDNA 2700081O15 gene
723	NA	NA	NA	NA	NA	NA	NA	NA	108900	2700049P18Rik	RIKEN cDNA 2700049P18 gene
724	NA	NA	4881	NA	1379.33	NA	3084.33	NA	108902	B3gnt1	UDP-GlcNAc:betaGal beta-1,3-N-acetylglucosaminyltransferase 1
725	3039.33	NA	5986	NA	1405.67	NA	NA	NA	108903	Tbcd	tubulin-specific chaperone d
726	105.333	0.000549712	NA	NA	NA	NA	NA	NA	108907	Nusap1	nucleolar and spindle associated protein 1
727	867.667	0.0483034	4691.67	NA	4136	NA	4814.33	NA	108911	Rcc2	regulator of chromosome condensation 2
728	NA	NA	NA	NA	NA	NA	NA	NA	108912	Cdca2	cell division cycle associated 2
729	NA	NA	1098.67	0.0680466	NA	NA	1913	NA	108927	Lhfp	lipoma HMGIC fusion partner
730	2605	NA	NA	NA	NA	NA	2606	NA	108943	Rg9mtd2	RNA (guanine-9-) methyltransferase domain containing 2
731	1690.33	NA	4675.67	NA	3441.33	NA	4923.67	NA	108946	Zzz3	zinc finger, ZZ domain containing 3
732	NA	NA	NA	NA	NA	NA	NA	NA	108954	Ppp1r15b	protein phosphatase 1, regulatory (inhibitor) subunit 15b
733	NA	NA	2536.33	NA	NA	NA	NA	NA	108958	Fam73b	family with sequence similarity 73, member B
734	NA	NA	540	0.0160595	NA	NA	NA	NA	108960	Irak2	interleukin-1 receptor-associated kinase 2
735	NA	NA	NA	NA	NA	NA	NA	NA	108961	E2f8	E2F transcription factor 8
736	NA	NA	NA	NA	NA	NA	NA	NA	108989	Tpr	translocated promoter region
737	NA	NA	NA	NA	NA	NA	NA	NA	108995	Tbc1d10c	TBC1 domain family, member 10c
738	NA	NA	3547.33	NA	3911.67	NA	2675	NA	109006	Ciapin1	cytokine induced apoptosis inhibitor 1
739	NA	NA	NA	NA	NA	NA	NA	NA	109019	Obfc2a	oligonucleotide/oligosaccharide-binding fold containing 2A
740	5619.67	NA	1547	NA	1868.33	NA	4556.33	NA	109042	Prkcdbp	protein kinase C, delta binding protein
741	NA	NA	NA	NA	NA	NA	894	0.0647368	109050	6530418L21Rik	RIKEN cDNA 6530418L21 gene
742	NA	NA	NA	NA	NA	NA	NA	NA	109052	Krt75	keratin 75
743	NA	NA	2147.67	NA	NA	NA	2227	NA	109054	Pfdn4	prefoldin 4
744	2626.67	NA	NA	NA	4648	NA	NA	NA	109065	1110034A24Rik	RIKEN cDNA 1110034A24 gene
745	4940.67	NA	1761.67	NA	4571.33	NA	3359.33	NA	109075	Exosc4	exosome component 4
746	3480.67	NA	4200.67	NA	4325.33	NA	3243	NA	109077	Ints5	integrator complex subunit 5
747	1032.33	0.0687886	NA	NA	4055.33	NA	NA	NA	109079	Sephs1	selenophosphate synthetase 1
748	3940.33	NA	6545.33	NA	1046	0.0735319	3065	NA	109082	Fbxw17	F-box and WD-40 domain protein 17
749	2563	NA	4609.67	NA	5205.33	NA	2877.33	NA	109093	Rars2	arginyl-tRNA synthetase 2, mitochondrial
750	NA	NA	3601	NA	4038.67	NA	2447.33	NA	109108	Slc30a9	solute carrier family 30 (zinc transporter), member 9
751	1645.33	NA	NA	NA	1730.67	NA	NA	NA	109113	Uhrf2	ubiquitin-like, containing PHD and RING finger domains 2
752	4073	NA	3392.67	NA	4677.33	NA	2966.67	NA	109115	Supt3h	suppressor of Ty 3 homolog (S. cerevisiae)
753	3572.33	NA	5045.67	NA	1901	NA	4295.67	NA	109129	2010311D03Rik	RIKEN cDNA 2010311D03 gene
754	NA	NA	NA	NA	NA	NA	NA	NA	109135	Plekha5	pleckstrin homology domain containing, family A member 5
755	4340	NA	1917.67	NA	2845	NA	5110	NA	109136	Mmaa	methylmalonic aciduria (cobalamin deficiency) type A
756	4057.67	NA	4538	NA	1521.33	NA	4482.33	NA	109145	Gins4	GINS complex subunit 4 (Sld5 homolog)
757	NA	NA	4952.33	NA	NA	NA	NA	NA	109151	Chd9	chromodomain helicase DNA binding protein 9
758	3181.33	NA	4708.67	NA	NA	NA	1752.33	NA	109154	Mlec	malectin
759	NA	NA	5699.33	NA	3033.33	NA	2635.67	NA	109161	Ube2q2	ubiquitin-conjugating enzyme E2Q (putative) 2
760	NA	NA	NA	NA	NA	NA	NA	NA	109168	Atl3	atlastin GTPase 3
761	NA	NA	NA	NA	NA	NA	NA	NA	109181	Trip11	thyroid hormone receptor interactor 11
762	NA	NA	NA	NA	NA	NA	NA	NA	109205	Sobp	sine oculis-binding protein homolog (Drosophila)
763	NA	NA	NA	NA	NA	NA	NA	NA	109212	6720460F02Rik	RIKEN cDNA 6720460F02 gene
764	NA	NA	NA	NA	NA	NA	NA	NA	109218	Tmem139	transmembrane protein 139
765	NA	NA	NA	NA	NA	NA	NA	NA	109222	Rarres1	retinoic acid receptor responder (tazarotene induced) 1
766	NA	NA	NA	NA	NA	NA	NA	NA	109225	Ms4a7	membrane-spanning 4-domains, subfamily A, member 7
767	2985.67	NA	2914	NA	4571.67	NA	4426.67	NA	109229	Fam118b	family with sequence similarity 118, member B
768	3516.67	NA	4941.33	NA	798.333	0.0434853	4919	NA	109232	Sccpdh	saccharopine dehydrogenase (putative)
769	2242.67	NA	5663	NA	NA	NA	2060.33	NA	109241	Mbd5	methyl-CpG binding domain protein 5
770	NA	NA	NA	NA	NA	NA	NA	NA	109242	Kif24	kinesin family member 24
771	NA	NA	NA	NA	NA	NA	NA	NA	109245	Lrrc39	leucine rich repeat containing 39
772	NA	NA	1396.67	NA	4336.67	NA	3431	NA	109246	Tspan9	tetraspanin 9
773	NA	NA	NA	NA	NA	NA	NA	NA	109254	9530008L14Rik	RIKEN cDNA 9530008L14 gene
774	2056.33	NA	NA	NA	1519.33	NA	NA	NA	109263	Rlf	rearranged L-myc fusion sequence
775	NA	NA	2968.33	NA	NA	NA	1718	NA	109264	Me3	malic enzyme 3, NADP(+)-dependent, mitochondrial
776	NA	NA	NA	NA	NA	NA	NA	NA	109267	Srcrb4d	scavenger receptor cysteine rich domain containing, group B (4 domains)
777	NA	NA	NA	NA	NA	NA	NA	NA	109270	Prr5	proline rich 5 (renal)
778	NA	NA	NA	NA	NA	NA	NA	NA	109272	8030451F13Rik	RIKEN cDNA 8030451F13 gene
779	3853.33	NA	2621.67	NA	2445.33	NA	NA	NA	109275	Actr5	ARP5 actin-related protein 5 homolog (yeast)
780	NA	NA	NA	NA	2030.33	NA	2160.67	NA	109284	C030046I01Rik	RIKEN cDNA C030046I01 gene
781	NA	NA	4345.67	NA	3238.33	NA	2122.67	NA	109299	C330006A16Rik	RIKEN cDNA C330006A16 gene
782	1366	NA	1512.33	NA	NA	NA	NA	NA	109305	Orai1	ORAI calcium release-activated calcium modulator 1
783	NA	NA	NA	NA	NA	NA	NA	NA	109314	A030004J04Rik	RIKEN cDNA A030004J04 gene
784	NA	NA	NA	NA	NA	NA	NA	NA	109323	C1qtnf7	C1q and tumor necrosis factor related protein 7
785	3112	NA	4317.67	NA	1611	NA	NA	NA	109331	Rnf20	ring finger protein 20
786	NA	NA	823.333	0.0386196	NA	NA	NA	NA	109333	Pkn2	protein kinase N2
787	NA	NA	NA	NA	NA	NA	NA	NA	109335	9230102K24Rik	RIKEN cDNA 9230102K24 gene
788	NA	NA	NA	NA	NA	NA	NA	NA	109342	Slc5a10	solute carrier family 5 (sodium/glucose cotransporter), member 10
789	NA	NA	NA	NA	2926	NA	NA	NA	109346	Ankrd39	ankyrin repeat domain 39
790	NA	NA	NA	NA	NA	NA	NA	NA	109349	Fam163b	family with sequence similarity 163, member B
791	3524.33	NA	3601.67	NA	4710.33	NA	3330.33	NA	109359	Fam175b	family with sequence similarity 175, member B
792	3852.33	NA	2343	NA	3713.67	NA	4729.67	NA	109552	Sri	sorcin
793	1672.67	NA	2027.67	NA	NA	NA	3611.67	NA	109594	Lmo1	LIM domain only 1
794	NA	NA	NA	NA	NA	NA	NA	NA	109620	Dsp	desmoplakin
795	451	0.0119562	NA	NA	3037	NA	NA	NA	109624	Cald1	caldesmon 1
796	NA	NA	NA	NA	NA	NA	NA	NA	109637	Upk1a	uroplakin 1A
797	NA	NA	NA	NA	NA	NA	297.333	0.00588256	109648	Npy	neuropeptide Y
798	NA	NA	1624	NA	1627.67	NA	NA	NA	109652	Acy1	aminoacylase 1
799	3148	NA	4420	NA	1685	NA	NA	NA	109658	Txlna	taxilin alpha
800	NA	NA	NA	NA	NA	NA	NA	NA	109660	Ctrl	chymotrypsin-like
801	3987.67	NA	2009	NA	3963	NA	4648.67	NA	109672	Cyb5	cytochrome b-5
802	3885.33	NA	1877.67	NA	NA	NA	3321	NA	109674	Ampd2	adenosine monophosphate deaminase 2 (isoform L)
803	NA	NA	2525	NA	1050.67	0.0741628	NA	NA	109676	Ank2	ankyrin 2, brain
804	NA	NA	NA	NA	NA	NA	NA	NA	109685	Hyal3	hyaluronoglucosaminidase 3
805	NA	NA	2779.67	NA	NA	NA	NA	NA	109689	Arrb1	arrestin, beta 1
806	NA	NA	NA	NA	NA	NA	NA	NA	109697	Cpa1	carboxypeptidase A1
807	NA	NA	NA	NA	NA	NA	NA	NA	109700	Itga1	integrin alpha 1
808	NA	NA	NA	NA	NA	NA	NA	NA	109711	Actn1	actinin, alpha 1
809	NA	NA	702.667	0.027859	3921.33	NA	NA	NA	109731	Maob	monoamine oxidase B
810	5045.67	NA	2497.33	NA	4727.33	NA	2369.33	NA	109754	Cyb5r3	cytochrome b5 reductase 3
811	3221	NA	5467	NA	2604.33	NA	3805.33	NA	109778	Blvra	biliverdin reductase A
812	3064	NA	6266.67	NA	1580.33	NA	3893.33	NA	109785	Pgm3	phosphoglucomutase 3
813	NA	NA	NA	NA	NA	NA	NA	NA	109791	Clps	colipase, pancreatic
814	2922.33	NA	2050.67	NA	4230.33	NA	5186.33	NA	109801	Glo1	glyoxalase 1
815	4168	NA	2882.33	NA	2569	NA	4886.67	NA	109815	H47	histocompatibility 47
816	NA	NA	NA	NA	NA	NA	NA	NA	109820	Pgc	progastricsin (pepsinogen C)
817	NA	NA	NA	NA	NA	NA	NA	NA	109821	F11	coagulation factor XI
818	2373	NA	600.333	0.0200879	NA	NA	NA	NA	109857	Cbr3	carbonyl reductase 3
819	NA	NA	NA	NA	NA	NA	NA	NA	109880	Braf	Braf transforming gene
820	NA	NA	NA	NA	NA	NA	NA	NA	109889	Mzf1	myeloid zinc finger 1
821	4668	NA	3368.33	NA	4075.33	NA	2870.67	NA	109900	Asl	argininosuccinate lyase
822	2703	NA	NA	NA	596	0.0239701	3819.67	NA	109901	Ela1	elastase 1, pancreatic
823	NA	NA	NA	NA	NA	NA	NA	NA	109904	Mcf2	mcf.2 transforming sequence
824	2789.33	NA	3384.67	NA	4568.67	NA	NA	NA	109910	Zfp91	zinc finger protein 91
825	2029.33	NA	NA	NA	2025	NA	4580	NA	109929	Zbtb25	zinc finger and BTB domain containing 25
826	NA	NA	2497.67	NA	NA	NA	NA	NA	109934	Abr	active BCR-related gene
827	NA	NA	NA	NA	NA	NA	NA	NA	109978	Art4	ADP-ribosyltransferase 4
828	NA	NA	NA	NA	NA	NA	NA	NA	109979	Art3	ADP-ribosyltransferase 3
829	2539.33	NA	NA	NA	2501	NA	NA	NA	110006	Gusb	glucuronidase, beta
830	NA	NA	3799	NA	3500.67	NA	1156.67	NA	110012	Gtrgeo22	gene trap ROSA b-geo 22
831	NA	NA	NA	NA	NA	NA	NA	NA	110033	Kif22	kinesin family member 22
832	NA	NA	NA	NA	NA	NA	214.333	0.00301468	110058	Syt17	synaptotagmin XVII
833	NA	NA	NA	NA	NA	NA	1327	NA	110074	Dut	deoxyuridine triphosphatase
834	3853.67	NA	876	0.0437691	4310.67	NA	NA	NA	110078	Pygb	brain glycogen phosphorylase
835	NA	NA	NA	NA	NA	NA	NA	NA	110082	Dnahc5	dynein, axonemal, heavy chain 5
836	NA	NA	NA	NA	NA	NA	NA	NA	110083	Dnahc12	dynein, axonemal, heavy chain 12
837	NA	NA	NA	NA	NA	NA	NA	NA	110084	Dnahc1	dynein, axonemal, heavy chain 1
838	3958	NA	NA	NA	2147.33	NA	NA	NA	110094	Phka2	phosphorylase kinase alpha 2
839	NA	NA	642	0.0230818	NA	NA	NA	NA	110095	Pygl	liver glycogen phosphorylase
840	3308.33	NA	NA	NA	3819	NA	2464.67	NA	110109	Nop2	NOP2 nucleolar protein homolog (yeast)
841	NA	NA	NA	NA	NA	NA	NA	NA	110115	Cyp11b1	cytochrome P450, family 11, subfamily b, polypeptide 1
842	NA	NA	5078	NA	3682	NA	1512	NA	110119	Mpi	mannose phosphate isomerase
843	NA	NA	NA	NA	NA	NA	NA	NA	110135	Fgb	fibrinogen, B beta polypeptide
844	NA	NA	NA	NA	NA	NA	2920.33	NA	110147	Ehmt2	euchromatic histone lysine N-methyltransferase 2
845	3246	NA	4880	NA	2013.67	NA	4600.67	NA	110157	Raf1	v-raf-leukemia viral oncogene 1
846	NA	NA	NA	NA	NA	NA	NA	NA	110168	Gpr18	G protein-coupled receptor 18
847	3925.33	NA	3300.67	NA	3052.67	NA	4514.67	NA	110172	Slc35b1	solute carrier family 35, member B1
848	4038	NA	3321.67	NA	1152.33	0.0881715	NA	NA	110173	Manba	mannosidase, beta A, lysosomal
849	NA	NA	NA	NA	NA	NA	515.667	0.0199517	110197	Dgkg	diacylglycerol kinase, gamma
850	4585.33	NA	3664.33	NA	3165	NA	3529.67	NA	110198	Akr7a5	aldo-keto reductase family 7, member A5 (aflatoxin aldehyde reductase)
851	1981.33	NA	4535.33	NA	3793.67	NA	4600.33	NA	110208	Pgd	phosphogluconate dehydrogenase
852	3834.33	NA	3080.67	NA	2397.67	NA	5111.33	NA	110213	Tmbim6	transmembrane BAX inhibitor motif containing 6
853	NA	NA	943.667	0.0506829	1838.33	NA	NA	NA	110253	Triobp	TRIO and F-actin binding protein
854	3731	NA	5743.67	NA	4210.67	NA	1344.33	NA	110265	Msra	methionine sulfoxide reductase A
855	NA	NA	3911	NA	NA	NA	1802.33	NA	110279	Bcr	breakpoint cluster region
856	NA	NA	NA	NA	NA	NA	NA	NA	110304	Glra3	glycine receptor, alpha 3 subunit
857	NA	NA	NA	NA	NA	NA	NA	NA	110308	Krt5	keratin 5
858	NA	NA	NA	NA	NA	NA	NA	NA	110310	Krt7	keratin 7
859	NA	NA	NA	NA	NA	NA	NA	NA	110312	Pmch	pro-melanin-concentrating hormone
860	3678.33	NA	2255.67	NA	NA	NA	3165.67	NA	110323	Cox6b1	cytochrome c oxidase, subunit VIb polypeptide 1
861	NA	NA	NA	NA	NA	NA	NA	NA	110326	Tas1r1	taste receptor, type 1, member 1
862	NA	NA	NA	NA	NA	NA	NA	NA	110350	Dync2h1	dynein cytoplasmic 2 heavy chain 1
863	1307.67	NA	6490.67	NA	NA	NA	2638	NA	110351	Rap1gap	Rap1 GTPase-activating protein
864	3767	NA	5214.33	NA	3559	NA	2733	NA	110355	Adrbk1	adrenergic receptor kinase, beta 1
865	4885	NA	2877.33	NA	2203.67	NA	4496.33	NA	110379	Sec13	SEC13 homolog (S. cerevisiae)
866	2270	NA	6124.67	NA	3204.67	NA	3595	NA	110380	Shroom2	shroom family member 2
867	NA	NA	NA	NA	NA	NA	NA	NA	110382	C8b	complement component 8, beta polypeptide
868	2710.67	NA	5635.67	NA	1093.33	0.0799213	NA	NA	110391	Qdpr	quinoid dihydropteridine reductase
869	2452.67	NA	2664	NA	3997.67	NA	5292	NA	110417	Pigh	phosphatidylinositol glycan anchor biosynthesis, class H
870	3293	NA	4217	NA	4122.33	NA	3580.67	NA	110446	Acat1	acetyl-Coenzyme A acetyltransferase 1
871	NA	NA	NA	NA	NA	NA	NA	NA	110454	Ly6a	lymphocyte antigen 6 complex, locus A
872	3164	NA	2803.67	NA	4922	NA	4067.33	NA	110460	Acat2	acetyl-Coenzyme A acetyltransferase 2
873	NA	NA	NA	NA	NA	NA	NA	NA	110524	Dgkq	diacylglycerol kinase, theta
874	NA	NA	NA	NA	NA	NA	NA	NA	110532	Adarb1	adenosine deaminase, RNA-specific, B1
875	NA	NA	NA	NA	NA	NA	NA	NA	110542	Amhr2	anti-Mullerian hormone type 2 receptor
876	2800	NA	5072.67	NA	1423	NA	NA	NA	110593	Prdm2	PR domain containing 2, with ZNF domain
877	2049.33	NA	342.667	0.00597597	NA	NA	NA	NA	110595	Timp4	tissue inhibitor of metalloproteinase 4
878	NA	NA	NA	NA	489.333	0.0160812	NA	NA	110596	Rgnef	Rho-guanine nucleotide exchange factor
879	2909.67	NA	NA	NA	1417.67	NA	NA	NA	110606	Fntb	farnesyltransferase, CAAX box, beta
880	3318.67	NA	3457.67	NA	NA	NA	1967	NA	110611	Hdlbp	high density lipoprotein (HDL) binding protein
881	NA	NA	NA	NA	NA	NA	NA	NA	110616	Atxn3	ataxin 3
882	815.667	0.0424279	NA	NA	NA	NA	NA	NA	110637	Grik4	glutamate receptor, ionotropic, kainate 4
883	2228	NA	5958	NA	2106	NA	4448.33	NA	110639	Prps2	phosphoribosyl pyrophosphate synthetase 2
884	NA	NA	NA	NA	NA	NA	NA	NA	110648	Lmx1a	LIM homeobox transcription factor 1 alpha
885	NA	NA	896	0.04574	NA	NA	NA	NA	110695	Aldh7a1	aldehyde dehydrogenase family 7, member A1
886	NA	NA	NA	NA	NA	NA	NA	NA	110749	Chaf1b	chromatin assembly factor 1, subunit B (p60)
887	2801.67	NA	5710	NA	3652.67	NA	NA	NA	110750	Cse1l	chromosome segregation 1-like (S. cerevisiae)
888	NA	NA	NA	NA	NA	NA	NA	NA	110751	Adam33	a disintegrin and metallopeptidase domain 33
889	NA	NA	NA	NA	NA	NA	NA	NA	110785	Igl-C1	immunoglobulin lambda chain, constant region 1
890	NA	NA	NA	NA	NA	NA	NA	NA	110786	Igl-C2	immunoglobulin lambda chain, constant region 2
891	NA	NA	NA	NA	80	0.000455932	NA	NA	110789	Gpr98	G protein-coupled receptor 98
892	1010	0.0658212	4573.67	NA	4508.67	NA	4565.33	NA	110796	Tshz1	teashirt zinc finger family member 1
893	2820.33	NA	6486.67	NA	2019.33	NA	3611.67	NA	110809	Sfrs1	splicing factor, arginine/serine-rich 1 (ASF/SF2)
894	3044	NA	NA	NA	2669.67	NA	2626.33	NA	110816	Pwp2	PWP2 periodic tryptophan protein homolog (yeast)
895	3680	NA	1739.67	NA	4627.33	NA	4579	NA	110821	Pcca	propionyl-Coenzyme A carboxylase, alpha polypeptide
896	4277	NA	1009.67	0.0577315	3658.33	NA	5084.67	NA	110826	Etfb	electron transferring flavoprotein, beta polypeptide
897	2231	NA	2606.67	NA	3211.33	NA	NA	NA	110829	Lims1	LIM and senescent cell antigen-like domains 1
898	NA	NA	NA	NA	NA	NA	NA	NA	110834	Chrna3	cholinergic receptor, nicotinic, alpha polypeptide 3
899	NA	NA	NA	NA	NA	NA	NA	NA	110835	Chrna5	cholinergic receptor, nicotinic, alpha polypeptide 5
900	3036	NA	1078.67	0.0657488	4967.33	NA	5048.33	NA	110842	Etfa	electron transferring flavoprotein, alpha polypeptide
901	3711.67	NA	3999	NA	3782.33	NA	3652.33	NA	110854	Ppp2r4	protein phosphatase 2A, regulatory subunit B (PR 53)
902	NA	NA	NA	NA	NA	NA	NA	NA	110855	Pde6c	phosphodiesterase 6C, cGMP specific, cone, alpha prime
903	NA	NA	NA	NA	NA	NA	NA	NA	110876	Scn2a1	sodium channel, voltage-gated, type II, alpha 1
904	NA	NA	NA	NA	NA	NA	NA	NA	110877	Slc18a1	solute carrier family 18 (vesicular monoamine), member 1
905	NA	NA	NA	NA	NA	NA	NA	NA	110880	Scn4a	sodium channel, voltage-gated, type IV, alpha
906	NA	NA	NA	NA	NA	NA	521.333	0.0204834	110886	Gabra5	gamma-aminobutyric acid (GABA-A) receptor, subunit alpha 5
907	NA	NA	NA	NA	NA	NA	NA	NA	110891	Slc8a2	solute carrier family 8 (sodium/calcium exchanger), member 2
908	NA	NA	NA	NA	NA	NA	NA	NA	110893	Slc8a3	solute carrier family 8 (sodium/calcium exchanger), member 3
909	NA	NA	NA	NA	NA	NA	NA	NA	110902	Chrna2	cholinergic receptor, nicotinic, alpha polypeptide 2 (neuronal)
910	4348	NA	4007.33	NA	1304.33	NA	4736	NA	110911	Cds2	CDP-diacylglycerol synthase (phosphatidate cytidylyltransferase) 2
911	NA	NA	NA	NA	NA	NA	1471.67	NA	110920	Hspa13	heat shock protein 70 family, member 13
912	NA	NA	NA	NA	NA	NA	NA	NA	110935	Atp6v1b1	ATPase, H+ transporting, lysosomal V1 subunit B1
913	3262	NA	NA	NA	2700.67	NA	NA	NA	110948	Hlcs	holocarboxylase synthetase (biotin- [propriony-Coenzyme A-carboxylase (ATP-hydrolysing)] ligase)
914	NA	NA	NA	NA	NA	NA	NA	NA	110957	D1Pas1	DNA segment, Chr 1, Pasteur Institute 1
915	NA	NA	NA	NA	NA	NA	NA	NA	110958	D6Mm5e	DNA segment, Chr 6, Miriam Meisler 5, expressed
916	3489	NA	2681.33	NA	5270.67	NA	3554.33	NA	110959	Nudt19	nudix (nucleoside diphosphate linked moiety X)-type motif 19
917	3057	NA	3983.67	NA	4429	NA	NA	NA	110960	Tars	threonyl-tRNA synthetase
918	1734.67	NA	NA	NA	2340	NA	NA	NA	110962	Mbd6	methyl-CpG binding domain protein 6
919	NA	NA	NA	NA	NA	NA	NA	NA	111173	Erc1	ELKS/RAB6-interacting/CAST family member 1
920	NA	NA	NA	NA	NA	NA	NA	NA	111174	Taar1	trace amine-associated receptor 1
921	4243.67	NA	3260.33	NA	1580	NA	NA	NA	111175	Pecr	peroxisomal trans-2-enoyl-CoA reductase
922	NA	NA	NA	NA	NA	NA	NA	NA	111975	Igf2as	insulin-like growth factor 2, antisense
923	2974.33	NA	3130.33	NA	4634.67	NA	4233	NA	112403	Dom3z	DOM-3 homolog Z (C. elegans)
924	NA	NA	2591.67	NA	NA	NA	NA	NA	112405	Egln1	EGL nine homolog 1 (C. elegans)
925	4437	NA	2625.67	NA	4885.67	NA	2966	NA	112406	Egln2	EGL nine homolog 2 (C. elegans)
926	3110.67	NA	2253	NA	NA	NA	2814	NA	112407	Egln3	EGL nine homolog 3 (C. elegans)
927	2109	NA	4330.67	NA	NA	NA	NA	NA	112415	C030039L03Rik	RIKEN cDNA C030039L03 gene
928	NA	NA	NA	NA	NA	NA	NA	NA	112417	Ugt2b37	UDP glucuronosyltransferase 2 family, polypeptide B37
929	NA	NA	NA	NA	NA	NA	NA	NA	112418	1700102P08Rik	RIKEN cDNA 1700102P08 gene
930	NA	NA	NA	NA	NA	NA	NA	NA	112419	2010002M12Rik	RIKEN cDNA 2010002M12 gene
931	NA	NA	NA	NA	NA	NA	NA	NA	112422	2610305D13Rik	RIKEN cDNA 2610305D13 gene
932	NA	NA	NA	NA	NA	NA	NA	NA	11287	Pzp	pregnancy zone protein
933	NA	NA	NA	NA	NA	NA	NA	NA	11298	Aanat	arylalkylamine N-acetyltransferase
934	NA	NA	NA	NA	271	0.0045224	NA	NA	11302	Aatk	apoptosis-associated tyrosine kinase
935	NA	NA	NA	NA	NA	NA	NA	NA	11303	Abca1	ATP-binding cassette, sub-family A (ABC1), member 1
936	NA	NA	NA	NA	NA	NA	NA	NA	11304	Abca4	ATP-binding cassette, sub-family A (ABC1), member 4
937	NA	NA	NA	NA	154	0.00142559	NA	NA	11305	Abca2	ATP-binding cassette, sub-family A (ABC1), member 2
938	2968	NA	NA	NA	1089.33	0.0794879	3094	NA	11307	Abcg1	ATP-binding cassette, sub-family G (WHITE), member 1
939	3072.67	NA	3056	NA	5104.67	NA	3791.67	NA	11308	Abi1	abl-interactor 1
940	2706.33	NA	NA	NA	279.333	0.00478407	NA	NA	11350	Abl1	c-abl oncogene 1, receptor tyrosine kinase
941	NA	NA	3612	NA	NA	NA	NA	NA	11352	Abl2	v-abl Abelson murine leukemia viral oncogene homolog 2 (arg, Abelson-related gene)
942	NA	NA	NA	NA	NA	NA	NA	NA	11354	Abpa	androgen binding protein alpha
943	3640	NA	785.667	0.0350967	3102.67	NA	NA	NA	11363	Acadl	acyl-Coenzyme A dehydrogenase, long-chain
944	3850.67	NA	1030.33	0.0600381	3365.67	NA	NA	NA	11364	Acadm	acyl-Coenzyme A dehydrogenase, medium chain
945	4024.33	NA	1438.67	NA	2789.67	NA	NA	NA	11370	Acadvl	acyl-Coenzyme A dehydrogenase, very long chain
946	NA	NA	NA	NA	NA	NA	NA	NA	113846	V1ra4	vomeronasal 1 receptor, A4
947	NA	NA	NA	NA	NA	NA	NA	NA	113847	V1ra5	vomeronasal 1 receptor, A5
948	NA	NA	NA	NA	NA	NA	NA	NA	113848	V1ra6	vomeronasal 1 receptor, A6
949	NA	NA	NA	NA	NA	NA	NA	NA	113851	V1ra9	vomeronasal 1 receptor, A9
950	NA	NA	NA	NA	NA	NA	NA	NA	113852	V1rb1	vomeronasal 1 receptor, B1
951	NA	NA	NA	NA	NA	NA	NA	NA	113853	V1rb3	vomeronasal 1 receptor, B3
952	NA	NA	NA	NA	NA	NA	NA	NA	113855	V1rb7	vomeronasal 1 receptor, B7
953	NA	NA	NA	NA	NA	NA	NA	NA	113856	V1rb8	vomeronasal 1 receptor, B8
954	NA	NA	NA	NA	NA	NA	NA	NA	113859	V1rc2	vomeronasal 1 receptor, C2
955	NA	NA	NA	NA	NA	NA	NA	NA	113860	V1rc3	vomeronasal 1 receptor, C3
956	NA	NA	NA	NA	NA	NA	NA	NA	113862	V1rc5	vomeronasal 1 receptor, C5
957	NA	NA	NA	NA	NA	NA	NA	NA	113863	V1rc6	vomeronasal 1 receptor, C6
958	NA	NA	NA	NA	NA	NA	NA	NA	113864	V1rc7	vomeronasal 1 receptor, C7
959	NA	NA	NA	NA	NA	NA	NA	NA	113865	V1rc8	vomeronasal 1 receptor, C8
960	3327.67	NA	3299.33	NA	2289.67	NA	NA	NA	113868	Acaa1a	acetyl-Coenzyme A acyltransferase 1A
961	NA	NA	541	0.0161313	NA	NA	NA	NA	11409	Acads	acyl-Coenzyme A dehydrogenase, short chain
962	3756.33	NA	3397.67	NA	3580.33	NA	4221	NA	114128	Laptm4b	lysosomal-associated protein transmembrane 4B
963	NA	NA	NA	NA	NA	NA	NA	NA	114141	Cldn16	claudin 16
964	NA	NA	NA	NA	NA	NA	NA	NA	114142	Foxp2	forkhead box P2
965	NA	NA	3389.33	NA	3831.67	NA	2086.33	NA	114143	Atp6v0b	ATPase, H+ transporting, lysosomal V0 subunit B
966	4176.33	NA	3940.33	NA	1939	NA	4575.33	NA	11416	Slc33a1	solute carrier family 33 (acetyl-CoA transporter), member 1
967	1375.67	NA	NA	NA	NA	NA	2857	NA	11418	Accn1	amiloride-sensitive cation channel 1, neuronal (degenerin)
968	1038.67	0.0696149	5460.67	NA	NA	NA	2640.33	NA	11419	Accn2	amiloride-sensitive cation channel 2, neuronal
969	NA	NA	NA	NA	NA	NA	NA	NA	11421	Ace	angiotensin I converting enzyme (peptidyl-dipeptidase A) 1
970	NA	NA	NA	NA	NA	NA	NA	NA	114229	Kiss1r	KISS1 receptor
971	NA	NA	NA	NA	NA	NA	943	0.0719549	11423	Ache	acetylcholinesterase
972	NA	NA	NA	NA	NA	NA	NA	NA	114230	Aipl1	aryl hydrocarbon receptor-interacting protein-like 1
973	NA	NA	NA	NA	NA	NA	NA	NA	114249	Npnt	nephronectin
974	NA	NA	NA	NA	NA	NA	NA	NA	11425	Apoc4	apolipoprotein C-IV
975	NA	NA	NA	NA	NA	NA	NA	NA	114255	Dok4	docking protein 4
976	NA	NA	NA	NA	NA	NA	NA	NA	11426	Macf1	microtubule-actin crosslinking factor 1
977	3653.67	NA	2885.33	NA	2527.33	NA	NA	NA	11428	Aco1	aconitase 1
978	NA	NA	3430.33	NA	3228	NA	2885	NA	11429	Aco2	aconitase 2, mitochondrial
979	2969.33	NA	2401	NA	3918.33	NA	NA	NA	11430	Acox1	acyl-Coenzyme A oxidase 1, palmitoyl
980	NA	NA	NA	NA	NA	NA	NA	NA	114301	Palmd	palmdelphin
981	NA	NA	NA	NA	NA	NA	NA	NA	114304	Slc28a3	solute carrier family 28 (sodium-coupled nucleoside transporter), member 3
982	1723	NA	3056.67	NA	4466	NA	NA	NA	11431	Acp1	acid phosphatase 1, soluble
983	NA	NA	1761.67	NA	4388.33	NA	3393.33	NA	11432	Acp2	acid phosphatase 2, lysosomal
984	NA	NA	NA	NA	NA	NA	NA	NA	11433	Acp5	acid phosphatase 5, tartrate resistant
985	NA	NA	NA	NA	NA	NA	NA	NA	114332	Lyve1	lymphatic vessel endothelial hyaluronan receptor 1
986	NA	NA	NA	NA	NA	NA	NA	NA	11434	Acr	acrosin prepropeptide
987	NA	NA	NA	NA	NA	NA	NA	NA	11435	Chrna1	cholinergic receptor, nicotinic, alpha polypeptide 1 (muscle)
988	NA	NA	NA	NA	NA	NA	550.667	0.0229252	11438	Chrna4	cholinergic receptor, nicotinic, alpha polypeptide 4
989	NA	NA	NA	NA	NA	NA	NA	NA	11440	Chrna6	cholinergic receptor, nicotinic, alpha polypeptide 6
990	NA	NA	NA	NA	NA	NA	NA	NA	11441	Chrna7	cholinergic receptor, nicotinic, alpha polypeptide 7
991	NA	NA	NA	NA	NA	NA	NA	NA	11443	Chrnb1	cholinergic receptor, nicotinic, beta polypeptide 1 (muscle)
992	NA	NA	NA	NA	NA	NA	NA	NA	11444	Chrnb2	cholinergic receptor, nicotinic, beta polypeptide 2 (neuronal)
993	NA	NA	NA	NA	NA	NA	NA	NA	11447	Chrnd	cholinergic receptor, nicotinic, delta polypeptide
994	NA	NA	NA	NA	NA	NA	NA	NA	114479	Slc5a5	solute carrier family 5 (sodium iodide symporter), member 5
995	NA	NA	NA	NA	NA	NA	NA	NA	11448	Chrne	cholinergic receptor, nicotinic, epsilon polypeptide
996	NA	NA	NA	NA	NA	NA	NA	NA	11449	Chrng	cholinergic receptor, nicotinic, gamma polypeptide
997	NA	NA	NA	NA	NA	NA	NA	NA	11450	Adipoq	adiponectin, C1Q and collagen domain containing
998	NA	NA	NA	NA	NA	NA	NA	NA	11451	Acrv1	acrosomal vesicle protein 1
999	2607.67	NA	5953.67	NA	2293	NA	4093.67	NA	114565	Zfp295	zinc finger protein 295
1000	NA	NA	NA	NA	NA	NA	NA	NA	114566	Krt82	keratin 82
1001	NA	NA	NA	NA	NA	NA	NA	NA	114570	Crip3	cysteine-rich protein 3
1002	1996.33	NA	599.333	0.0200205	NA	NA	NA	NA	114584	Clic1	chloride intracellular channel 1
1003	NA	NA	NA	NA	NA	NA	219.333	0.00314894	11459	Acta1	actin, alpha 1, skeletal muscle
1004	NA	NA	NA	NA	NA	NA	243	0.0038328	114601	Ehbp1l1	EH domain binding protein 1-like 1
1005	NA	NA	NA	NA	NA	NA	NA	NA	114602	Zmynd10	zinc finger, MYND domain containing 10
1006	1513.33	NA	NA	NA	3981	NA	3183.33	NA	114604	Prdm15	PR domain containing 15
1007	1982.67	NA	NA	NA	NA	NA	1580.33	NA	114606	Tle6	transducin-like enhancer of split 6, homolog of Drosophila E(spl)
1008	4021.67	NA	2545	NA	3912.67	NA	4321	NA	11461	Actb	actin, beta
1009	NA	NA	NA	NA	NA	NA	NA	NA	114615	Elac1	elaC homolog 1 (E. coli)
1010	NA	NA	NA	NA	NA	NA	NA	NA	11464	Actc1	actin, alpha, cardiac muscle 1
1011	NA	NA	NA	NA	NA	NA	NA	NA	114640	Pth2	parathyroid hormone 2
1012	2846.67	NA	4275.33	NA	NA	NA	1915.33	NA	114641	Rpl31	ribosomal protein L31
1013	NA	NA	NA	NA	NA	NA	NA	NA	114642	Brdt	bromodomain, testis-specific
1014	NA	NA	NA	NA	NA	NA	NA	NA	114643	Oas1c	2'-5' oligoadenylate synthetase 1C
1015	NA	NA	465.333	0.0115695	NA	NA	NA	NA	114644	Slc13a3	solute carrier family 13 (sodium-dependent dicarboxylate transporter), member 3
1016	NA	NA	NA	NA	NA	NA	NA	NA	114654	Ly6g6d	lymphocyte antigen 6 complex, locus G6D
1017	NA	NA	NA	NA	NA	NA	NA	NA	114661	Prss28	protease, serine, 28
1018	NA	NA	NA	NA	NA	NA	NA	NA	114662	Prss29	protease, serine, 29
1019	NA	NA	534.333	0.0156726	NA	NA	NA	NA	114663	Impa2	inositol (myo)-1(or 4)-monophosphatase 2
1020	3703	NA	2041.33	NA	4693	NA	4320.67	NA	114664	Hsd17b11	hydroxysteroid (17-beta) dehydrogenase 11
1021	NA	NA	NA	NA	NA	NA	NA	NA	114666	Krtap5-5	keratin associated protein 5-5
1022	NA	NA	NA	NA	NA	NA	NA	NA	114672	1700007E05Rik	RIKEN cDNA 1700007E05 gene
1023	NA	NA	NA	NA	NA	NA	NA	NA	114673	4930433N12Rik	RIKEN cDNA 4930433N12 gene
1024	1989.67	NA	5124.33	NA	4360.33	NA	NA	NA	114674	Gtf2ird2	GTF2I repeat domain containing 2
1025	NA	NA	2097.67	NA	3153.67	NA	2961.67	NA	114679	Selm	selenoprotein M
1026	NA	NA	NA	NA	NA	NA	NA	NA	11468	Actg2	actin, gamma 2, smooth muscle, enteric
1027	NA	NA	NA	NA	NA	NA	NA	NA	11470	Actl7a	actin-like 7a
1028	NA	NA	NA	NA	NA	NA	NA	NA	11471	Actl7b	actin-like 7b
1029	NA	NA	NA	NA	NA	NA	NA	NA	114712	Ferd3l	Fer3-like (Drosophila)
1030	2523.67	NA	1239.33	0.0853444	NA	NA	NA	NA	114713	Rasa2	RAS p21 protein activator 2
1031	NA	NA	NA	NA	NA	NA	NA	NA	114714	Rad51c	Rad51 homolog c (S. cerevisiae)
1032	NA	NA	NA	NA	NA	NA	NA	NA	114716	Spred2	sprouty-related, EVH1 domain containing 2
1033	NA	NA	NA	NA	NA	NA	NA	NA	11472	Actn2	actinin alpha 2
1034	NA	NA	NA	NA	NA	NA	NA	NA	11474	Actn3	actinin alpha 3
1035	NA	NA	NA	NA	NA	NA	NA	NA	114741	Supt16h	suppressor of Ty 16 homolog (S. cerevisiae)
1036	NA	NA	2710.67	NA	NA	NA	NA	NA	11475	Acta2	actin, alpha 2, smooth muscle, aorta
1037	NA	NA	3737	NA	2295.33	NA	3241.67	NA	11477	Acvr1	activin A receptor, type 1
1038	NA	NA	NA	NA	NA	NA	NA	NA	11479	Acvr1b	activin A receptor, type 1B
1039	NA	NA	NA	NA	NA	NA	1422.67	NA	11480	Acvr2a	activin receptor IIA
1040	NA	NA	NA	NA	NA	NA	NA	NA	11481	Acvr2b	activin receptor IIB
1041	NA	NA	NA	NA	NA	NA	NA	NA	11482	Acvrl1	activin A receptor, type II-like 1
1042	2405.33	NA	4461.33	NA	187.333	0.0021737	NA	NA	11484	Aspa	aspartoacylase
1043	NA	NA	NA	NA	217.667	0.00292663	NA	NA	11486	Ada	adenosine deaminase
1044	4560.33	NA	4802.33	NA	3484.33	NA	2202.67	NA	114863	Prosc	proline synthetase co-transcribed
1045	NA	NA	NA	NA	NA	NA	NA	NA	11487	Adam10	a disintegrin and metallopeptidase domain 10
1046	NA	NA	NA	NA	NA	NA	NA	NA	114873	Dscaml1	Down syndrome cell adhesion molecule-like 1
1047	3862.33	NA	3233.33	NA	2668	NA	4860.67	NA	114874	Ddhd1	DDHD domain containing 1
1048	NA	NA	NA	NA	NA	NA	NA	NA	114875	Plcz1	phospholipase C, zeta 1
1049	NA	NA	NA	NA	NA	NA	758.333	0.0463015	11488	Adam11	a disintegrin and metallopeptidase domain 11
1050	NA	NA	NA	NA	NA	NA	371	0.00969925	114886	Cygb	cytoglobin
1051	NA	NA	NA	NA	NA	NA	NA	NA	114889	Vsx1	visual system homeobox 1 homolog (zebrafish)
1052	216.333	0.00235494	NA	NA	NA	NA	NA	NA	11489	Adam12	a disintegrin and metallopeptidase domain 12 (meltrin alpha)
1053	1738.67	NA	5860	NA	4404	NA	3234	NA	114893	Dcun1d1	DCN1, defective in cullin neddylation 1, domain containing 1 (S. cerevisiae)
1054	3615	NA	3573.67	NA	2651.33	NA	4846	NA	114896	Afg3l1	AFG3(ATPase family gene 3)-like 1 (yeast)
1055	NA	NA	NA	NA	NA	NA	NA	NA	11490	Adam15	a disintegrin and metallopeptidase domain 15 (metargidin)
1056	2293.33	NA	NA	NA	712.333	0.0345128	NA	NA	11491	Adam17	a disintegrin and metallopeptidase domain 17
1057	NA	NA	NA	NA	NA	NA	NA	NA	11492	Adam19	a disintegrin and metallopeptidase domain 19 (meltrin beta)
1058	NA	NA	NA	NA	NA	NA	NA	NA	11495	Adam2	a disintegrin and metallopeptidase domain 2
1059	NA	NA	NA	NA	NA	NA	NA	NA	11496	Adam22	a disintegrin and metallopeptidase domain 22
1060	NA	NA	NA	NA	NA	NA	NA	NA	11497	Adam3	a disintegrin and metallopeptidase domain 3 (cyritestin)
1061	NA	NA	NA	NA	NA	NA	NA	NA	11499	Adam5	a disintegrin and metallopeptidase domain 5
1062	NA	NA	NA	NA	NA	NA	NA	NA	11500	Adam7	a disintegrin and metallopeptidase domain 7
1063	NA	NA	NA	NA	NA	NA	NA	NA	11501	Adam8	a disintegrin and metallopeptidase domain 8
1064	986.667	0.0628368	6230.67	NA	2709.33	NA	4479.33	NA	11502	Adam9	a disintegrin and metallopeptidase domain 9 (meltrin gamma)
1065	2313.33	NA	NA	NA	412	0.0110869	NA	NA	11504	Adamts1	a disintegrin-like and metallopeptidase (reprolysin type) with thrombospondin type 1 motif, 1
1066	NA	NA	NA	NA	3041.67	NA	NA	NA	11512	Adcy6	adenylate cyclase 6
1067	NA	NA	NA	NA	NA	NA	NA	NA	11513	Adcy7	adenylate cyclase 7
1068	2575	NA	4692	NA	NA	NA	1942.33	NA	11514	Adcy8	adenylate cyclase 8
1069	NA	NA	5421.67	NA	NA	NA	NA	NA	11515	Adcy9	adenylate cyclase 9
1070	NA	NA	NA	NA	NA	NA	129.333	0.000936269	11516	Adcyap1	adenylate cyclase activating polypeptide 1
1071	NA	NA	632.667	0.0223212	NA	NA	NA	NA	11517	Adcyap1r1	adenylate cyclase activating polypeptide 1 receptor 1
1072	NA	NA	4899.33	NA	1301.67	NA	3233.33	NA	11518	Add1	adducin 1 (alpha)
1073	NA	NA	NA	NA	NA	NA	NA	NA	11519	Add2	adducin 2 (beta)
1074	2368	NA	818	0.0380744	4682.67	NA	NA	NA	11520	Adfp	adipose differentiation related protein
1075	NA	NA	NA	NA	NA	NA	NA	NA	11522	Adh1	alcohol dehydrogenase 1 (class I)
1076	NA	NA	NA	NA	NA	NA	NA	NA	11529	Adh7	alcohol dehydrogenase 7 (class IV), mu or sigma polypeptide
1077	3092.33	NA	3524	NA	2689.67	NA	5198.67	NA	11532	Adh5	alcohol dehydrogenase 5 (class III), chi polypeptide
1078	4043	NA	1210.67	0.0817966	3388	NA	5308	NA	11534	Adk	adenosine kinase
1079	345	0.00661351	NA	NA	NA	NA	NA	NA	11535	Adm	adrenomedullin
1080	NA	NA	NA	NA	NA	NA	NA	NA	11536	Gpr182	G protein-coupled receptor 182
1081	NA	NA	NA	NA	NA	NA	NA	NA	11537	Cfd	complement factor D (adipsin)
1082	2831	NA	4669	NA	4096	NA	3641.67	NA	11538	Adnp	activity-dependent neuroprotective protein
1083	2879	NA	5693.67	NA	3494.67	NA	3239.67	NA	11539	Adora1	adenosine A1 receptor
1084	NA	NA	NA	NA	NA	NA	NA	NA	11540	Adora2a	adenosine A2a receptor
1085	1882.33	NA	471.667	0.0118875	NA	NA	NA	NA	11541	Adora2b	adenosine A2b receptor
1086	NA	NA	NA	NA	NA	NA	NA	NA	11542	Adora3	adenosine A3 receptor
1087	NA	NA	3911.33	NA	2996.33	NA	3058.33	NA	11544	Adprh	ADP-ribosylarginine hydrolase
1088	3209	NA	6567	NA	2316.67	NA	2982.33	NA	11545	Parp1	poly (ADP-ribose) polymerase family, member 1
1089	2402	NA	3309	NA	5867.33	NA	3337	NA	11546	Parp2	poly (ADP-ribose) polymerase family, member 2
1090	NA	NA	NA	NA	NA	NA	NA	NA	11548	Adra1b	adrenergic receptor, alpha 1b
1091	NA	NA	NA	NA	NA	NA	NA	NA	11549	Adra1a	adrenergic receptor, alpha 1a
1092	NA	NA	NA	NA	NA	NA	NA	NA	11551	Adra2a	adrenergic receptor, alpha 2a
1093	NA	NA	NA	NA	NA	NA	NA	NA	11552	Adra2b	adrenergic receptor, alpha 2b
1094	NA	NA	NA	NA	NA	NA	NA	NA	11553	Adra2c	adrenergic receptor, alpha 2c
1095	NA	NA	NA	NA	NA	NA	NA	NA	11555	Adrb2	adrenergic receptor, beta 2
1096	NA	NA	NA	NA	NA	NA	NA	NA	11556	Adrb3	adrenergic receptor, beta 3
1097	4069	NA	2301.67	NA	3113.67	NA	4967	NA	11564	Adsl	adenylosuccinate lyase
1098	2912.33	NA	6696	NA	350	0.00790175	3966	NA	11565	Adssl1	adenylosuccinate synthetase like 1
1099	NA	NA	5352.33	NA	3520	NA	2990	NA	11566	Adss	adenylosuccinate synthetase, non muscle
1100	NA	NA	NA	NA	NA	NA	NA	NA	11567	Avil	advillin
1101	3653.67	NA	NA	NA	1068.33	0.0766303	NA	NA	11568	Aebp1	AE binding protein 1
1102	2071	NA	6501	NA	2835.33	NA	NA	NA	11569	Aebp2	AE binding protein 2
1103	NA	NA	NA	NA	NA	NA	NA	NA	11571	Crisp1	cysteine-rich secretory protein 1
1104	NA	NA	NA	NA	NA	NA	NA	NA	11572	Crisp3	cysteine-rich secretory protein 3
1105	NA	NA	NA	NA	NA	NA	NA	NA	11576	Afp	alpha fetoprotein
1106	4021	NA	2378.67	NA	1555	NA	NA	NA	11593	Aga	aspartylglucosaminidase
1107	NA	NA	NA	NA	NA	NA	NA	NA	11595	Acan	aggrecan
1108	NA	NA	NA	NA	NA	NA	NA	NA	11596	Ager	advanced glycosylation end product-specific receptor
1109	NA	NA	NA	NA	NA	NA	NA	NA	11600	Angpt1	angiopoietin 1
1110	NA	NA	NA	NA	NA	NA	NA	NA	11601	Angpt2	angiopoietin 2
1111	NA	NA	NA	NA	NA	NA	NA	NA	11602	Angpt4	angiopoietin 4
1112	2053	NA	NA	NA	3408	NA	NA	NA	11603	Agrn	agrin
1113	NA	NA	NA	NA	NA	NA	NA	NA	11604	Agrp	agouti related protein
1114	NA	NA	NA	NA	NA	NA	NA	NA	11605	Gla	galactosidase, alpha
1115	NA	NA	142.667	0.000946659	NA	NA	NA	NA	11606	Agt	angiotensinogen (serpin peptidase inhibitor, clade A, member 8)
1116	NA	NA	NA	NA	NA	NA	NA	NA	11607	Agtr1a	angiotensin II receptor, type 1a
1117	NA	NA	NA	NA	NA	NA	NA	NA	11608	Agtr1b	angiotensin II receptor, type 1b
1118	NA	NA	NA	NA	NA	NA	NA	NA	11609	Agtr2	angiotensin II receptor, type 2
1119	NA	NA	449.333	0.0106873	NA	NA	NA	NA	11610	Agtrap	angiotensin II, type I receptor-associated protein
1120	NA	NA	NA	NA	NA	NA	NA	NA	11611	Agxt	alanine-glyoxylate aminotransferase
1121	NA	NA	NA	NA	NA	NA	NA	NA	11614	Nr0b1	nuclear receptor subfamily 0, group B, member 1
1122	NA	NA	NA	NA	NA	NA	NA	NA	11622	Ahr	aryl-hydrocarbon receptor
1123	NA	NA	NA	NA	NA	NA	NA	NA	11624	Ahrr	aryl-hydrocarbon receptor repressor
1124	NA	NA	NA	NA	NA	NA	NA	NA	11625	Ahsg	alpha-2-HS-glycoprotein
1125	NA	NA	NA	NA	NA	NA	NA	NA	11628	Aicda	activation-induced cytidine deaminase
1126	NA	NA	NA	NA	NA	NA	NA	NA	11629	Aif1	allograft inflammatory factor 1
1127	NA	NA	NA	NA	NA	NA	NA	NA	11630	Aim1	absent in melanoma 1
1128	NA	NA	4093.33	NA	3370.33	NA	1542	NA	11632	Aip	aryl-hydrocarbon receptor-interacting protein
1129	NA	NA	NA	NA	NA	NA	NA	NA	11634	Aire	autoimmune regulator (autoimmune polyendocrinopathy candidiasis ectodermal dystrophy)
1130	NA	NA	1954.67	NA	4476.67	NA	3177	NA	11636	Ak1	adenylate kinase 1
1131	4083.67	NA	2723.67	NA	2123.67	NA	5246.67	NA	11637	Ak2	adenylate kinase 2
1132	NA	NA	1064	0.0638834	NA	NA	NA	NA	11639	Ak3l1	adenylate kinase 3-like 1
1133	NA	NA	NA	NA	NA	NA	NA	NA	11640	Akap1	A kinase (PRKA) anchor protein 1
1134	NA	NA	NA	NA	1495	NA	NA	NA	11641	Akap2	A kinase (PRKA) anchor protein 2
1135	NA	NA	NA	NA	NA	NA	NA	NA	11642	Akap3	A kinase (PRKA) anchor protein 3
1136	NA	NA	NA	NA	NA	NA	NA	NA	11643	Akap4	A kinase (PRKA) anchor protein 4
1137	NA	NA	545.333	0.0164009	NA	NA	NA	NA	11647	Alpl	alkaline phosphatase, liver/bone/kidney
1138	NA	NA	NA	NA	NA	NA	NA	NA	11648	Akp3	alkaline phosphatase 3, intestine, not Mn requiring
1139	NA	NA	NA	NA	NA	NA	NA	NA	11650	Akp5	alkaline phosphatase 5
1140	2263.33	NA	2358	NA	NA	NA	NA	NA	11651	Akt1	thymoma viral proto-oncogene 1
1141	4316	NA	764	0.033136	4406.33	NA	NA	NA	11652	Akt2	thymoma viral proto-oncogene 2
1142	NA	NA	2947.67	NA	4397.67	NA	2145	NA	11655	Alas1	aminolevulinic acid synthase 1
1143	NA	NA	NA	NA	NA	NA	NA	NA	11656	Alas2	aminolevulinic acid synthase 2, erythroid
1144	NA	NA	NA	NA	NA	NA	NA	NA	11657	Alb	albumin
1145	NA	NA	2283	NA	NA	NA	NA	NA	11658	Alcam	activated leukocyte cell adhesion molecule
1146	NA	NA	NA	NA	887.667	0.0534115	NA	NA	11666	Abcd1	ATP-binding cassette, sub-family D (ALD), member 1
1147	2938.67	NA	626.333	0.0218538	5002	NA	NA	NA	11668	Aldh1a1	aldehyde dehydrogenase family 1, subfamily A1
1148	3925.67	NA	1199.33	0.0804484	4678	NA	4614	NA	11669	Aldh2	aldehyde dehydrogenase 2, mitochondrial
1149	NA	NA	NA	NA	NA	NA	NA	NA	11670	Aldh3a1	aldehyde dehydrogenase family 3, subfamily A1
1150	2204	NA	689	0.0267101	4276.67	NA	NA	NA	116701	Fgfrl1	fibroblast growth factor receptor-like 1
1151	2968.33	NA	4643.67	NA	1770.67	NA	NA	NA	11671	Aldh3a2	aldehyde dehydrogenase family 3, subfamily A2
1152	NA	NA	NA	NA	NA	NA	NA	NA	116732	Tsga13	testis specific gene A13
1153	4555	NA	4786.67	NA	2971	NA	2743.33	NA	116733	Vps4a	vacuolar protein sorting 4a (yeast)
1154	NA	NA	2829	NA	NA	NA	2191.33	NA	11674	Aldoa	aldolase A, fructose-bisphosphate
1155	NA	NA	NA	NA	NA	NA	NA	NA	116746	Defb6	defensin beta 6
1156	5058.67	NA	1302.67	0.0936841	4569	NA	3513.33	NA	116748	Lsm10	U7 snRNP-specific Sm-like protein LSM10
1157	NA	NA	710.333	0.028517	NA	NA	NA	NA	11676	Aldoc	aldolase C, fructose-bisphosphate
1158	NA	NA	NA	NA	NA	NA	NA	NA	116810	Foxn4	forkhead box N4
1159	NA	NA	NA	NA	NA	NA	514	0.0198067	11682	Alk	anaplastic lymphoma kinase
1160	NA	NA	NA	NA	NA	NA	NA	NA	116838	Rims2	regulating synaptic membrane exocytosis 2
1161	NA	NA	NA	NA	NA	NA	NA	NA	11684	Alox12	arachidonate 12-lipoxygenase
1162	NA	NA	218.667	0.00221131	NA	NA	NA	NA	116847	Prelp	proline arginine-rich end leucine-rich repeat
1163	NA	NA	NA	NA	NA	NA	NA	NA	116848	Baz2a	bromodomain adjacent to zinc finger domain, 2A
1164	NA	NA	NA	NA	NA	NA	NA	NA	11685	Alox12e	arachidonate lipoxygenase, epidermal
1165	NA	NA	NA	NA	NA	NA	NA	NA	116852	Akr1c20	aldo-keto reductase family 1, member C20
1166	NA	NA	NA	NA	NA	NA	NA	NA	11686	Alox12b	arachidonate 12-lipoxygenase, 12R type
1167	NA	NA	NA	NA	NA	NA	NA	NA	11687	Alox15	arachidonate 15-lipoxygenase
1168	2373	NA	5918.67	NA	2902.67	NA	NA	NA	116870	Mta1	metastasis associated 1
1169	3240.33	NA	6168	NA	663.333	0.0298154	4221.67	NA	116871	Mta3	metastasis associated 3
1170	NA	NA	NA	NA	NA	NA	NA	NA	116872	Serpinb7	serine (or cysteine) peptidase inhibitor, clade B, member 7
1171	2042.67	NA	6694	NA	3881.33	NA	2541	NA	116873	Stim2	stromal interaction molecule 2
1172	NA	NA	NA	NA	NA	NA	NA	NA	11688	Alox8	arachidonate 8-lipoxygenase
1173	NA	NA	NA	NA	NA	NA	NA	NA	11689	Alox5	arachidonate 5-lipoxygenase
1174	3389	NA	2496.33	NA	3763.67	NA	4952.67	NA	116891	Derl2	Der1-like domain family, member 2
1175	NA	NA	NA	NA	NA	NA	NA	NA	11690	Alox5ap	arachidonate 5-lipoxygenase activating protein
1176	NA	NA	NA	NA	NA	NA	NA	NA	116903	Calcb	calcitonin-related polypeptide, beta
1177	NA	NA	NA	NA	NA	NA	NA	NA	116904	Alpk3	alpha-kinase 3
1178	NA	NA	NA	NA	NA	NA	NA	NA	116913	Tpbpb	trophoblast specific protein beta
1179	NA	NA	3663.67	NA	NA	NA	1759.33	NA	116914	Slc19a2	solute carrier family 19 (thiamine transporter), member 2
1180	3105	NA	3139	NA	3939	NA	4666	NA	11692	Gfer	growth factor, erv1 (S. cerevisiae)-like (augmenter of liver regeneration)
1181	NA	NA	NA	NA	NA	NA	NA	NA	116939	Pnpla3	patatin-like phospholipase domain containing 3
1182	NA	NA	NA	NA	NA	NA	NA	NA	11694	Alx3	aristaless-like homeobox 3
1183	1034.33	0.0690787	NA	NA	2945.33	NA	NA	NA	116940	Tgs1	trimethylguanosine synthase homolog (S. cerevisiae)
1184	NA	NA	NA	NA	NA	NA	NA	NA	11695	Alx4	aristaless-like homeobox 4
1185	2306.67	NA	NA	NA	249	0.0038401	NA	NA	116972	Fam57a	family with sequence similarity 57, member A
1186	NA	NA	NA	NA	NA	NA	NA	NA	11698	Ambn	ameloblastin
1187	NA	NA	NA	NA	NA	NA	NA	NA	11699	Ambp	alpha 1 microglobulin/bikunin
1188	NA	NA	NA	NA	NA	NA	NA	NA	117004	Olfr73	olfactory receptor 73
1189	NA	NA	NA	NA	NA	NA	NA	NA	117005	Olfr74	olfactory receptor 74
1190	NA	NA	NA	NA	NA	NA	NA	NA	11704	Amelx	amelogenin X chromosome
1191	NA	NA	NA	NA	NA	NA	NA	NA	11705	Amh	anti-Mullerian hormone
1192	NA	NA	NA	NA	NA	NA	NA	NA	117066	Cts3	cathepsin 3
1193	NA	NA	3162	NA	4584	NA	2102.33	NA	117109	Pop5	processing of precursor 5, ribonuclease P/MRP family (S. cerevisiae)
1194	4160.33	NA	4337.67	NA	3370.33	NA	NA	NA	117146	Ube3b	ubiquitin protein ligase E3B
1195	NA	NA	NA	NA	NA	NA	NA	NA	117147	Acsm1	acyl-CoA synthetase medium-chain family member 1
1196	1285.33	NA	NA	NA	NA	NA	1779	NA	117148	Necab2	N-terminal EF-hand calcium binding protein 2
1197	NA	NA	NA	NA	NA	NA	NA	NA	117149	Tirap	toll-interleukin 1 receptor (TIR) domain-containing adaptor protein
1198	NA	NA	6005	NA	2168.33	NA	2208.67	NA	117150	Pip4k2c	phosphatidylinositol-5-phosphate 4-kinase, type II, gamma
1199	NA	NA	NA	NA	NA	NA	NA	NA	117158	Scgb3a2	secretoglobin, family 3A, member 2
1200	3093.67	NA	3087.33	NA	1608.67	NA	NA	NA	117160	Ttyh2	tweety homolog 2 (Drosophila)
1201	NA	NA	NA	NA	NA	NA	NA	NA	117167	Steap4	STEAP family member 4
1202	357	0.0071717	3101	NA	NA	NA	NA	NA	11717	Ampd3	adenosine monophosphate deaminase 3
1203	3774.67	NA	3001.33	NA	5259.67	NA	3019.33	NA	117171	1110038F14Rik	RIKEN cDNA 1110038F14 gene
1204	NA	NA	NA	NA	NA	NA	NA	NA	117172	2310034C09Rik	RIKEN cDNA 2310034C09 gene
1205	4077.33	NA	3291.67	NA	3693.33	NA	3922.33	NA	117197	Cno	cappuccino
1206	3123	NA	2839	NA	3981.33	NA	NA	NA	117198	Ivns1abp	influenza virus NS1A binding protein
1207	NA	NA	NA	NA	NA	NA	NA	NA	11720	Mat1a	methionine adenosyltransferase I, alpha
1208	NA	NA	NA	NA	NA	NA	NA	NA	11722	Amy1	amylase 1, salivary
1209	NA	NA	NA	NA	NA	NA	NA	NA	117229	Stk33	serine/threonine kinase 33
1210	NA	NA	NA	NA	NA	NA	NA	NA	11727	Ang	angiogenin, ribonuclease, RNase A family, 5
1211	NA	NA	NA	NA	NA	NA	NA	NA	11730	Ang3	angiogenin, ribonuclease A family, member 3
1212	NA	NA	NA	NA	NA	NA	NA	NA	11731	Ang2	angiogenin, ribonuclease A family, member 2
1213	5280	NA	4055.67	NA	2239	NA	3054.67	NA	11732	Ank	progressive ankylosis
1214	NA	NA	NA	NA	NA	NA	NA	NA	11733	Ank1	ankyrin 1, erythroid
1215	2314	NA	NA	NA	908.333	0.0559801	NA	NA	11735	Ank3	ankyrin 3, epithelial
1216	2137.67	NA	3905	NA	3534.33	NA	NA	NA	11736	Ankfy1	ankyrin repeat and FYVE domain containing 1
1217	2993.67	NA	3661.33	NA	NA	NA	2842.67	NA	11737	Anp32a	acidic (leucine-rich) nuclear phosphoprotein 32 family, member A
1218	3608.67	NA	3440	NA	4500.67	NA	3570.33	NA	11739	Slc25a4	solute carrier family 25 (mitochondrial carrier, adenine nucleotide translocator), member 4
1219	NA	NA	NA	NA	NA	NA	NA	NA	11745	Anxa3	annexin A3
1220	NA	NA	1346.33	0.0996805	1902.33	NA	NA	NA	11746	Anxa4	annexin A4
1221	NA	NA	741.333	0.0311635	2763	NA	NA	NA	11747	Anxa5	annexin A5
1222	2085	NA	NA	NA	NA	NA	1651.33	NA	11749	Anxa6	annexin A6
1223	NA	NA	3647	NA	NA	NA	1193	NA	11750	Anxa7	annexin A7
1224	NA	NA	NA	NA	NA	NA	NA	NA	11752	Anxa8	annexin A8
1225	NA	NA	NA	NA	NA	NA	NA	NA	11754	Aoc3	amine oxidase, copper containing 3
1226	5433	NA	1970.33	NA	3116.67	NA	3834	NA	11757	Prdx3	peroxiredoxin 3
1227	4513.33	NA	580.667	0.0187559	2909	NA	NA	NA	11758	Prdx6	peroxiredoxin 6
1228	NA	NA	NA	NA	NA	NA	NA	NA	117589	Asb7	ankyrin repeat and SOCS box-containing 7
1229	NA	NA	NA	NA	NA	NA	NA	NA	117590	Asb10	ankyrin repeat and SOCS box-containing 10
1230	NA	NA	NA	NA	NA	NA	NA	NA	117591	Slc2a9	solute carrier family 2 (facilitated glucose transporter), member 9
1231	3275.67	NA	NA	NA	3972	NA	966.333	0.0755371	117592	B3galt6	UDP-Gal:betaGal beta 1,3-galactosyltransferase, polypeptide 6
1232	NA	NA	NA	NA	NA	NA	NA	NA	117599	Helb	helicase (DNA) B
1233	NA	NA	NA	NA	NA	NA	NA	NA	117600	Srgap1	SLIT-ROBO Rho GTPase activating protein 1
1234	NA	NA	NA	NA	NA	NA	NA	NA	117606	Boc	biregional cell adhesion molecule-related/down-regulated by oncogenes (Cdon) binding protein
1235	NA	NA	207	0.00202521	NA	NA	NA	NA	11761	Aox1	aldehyde oxidase 1
1236	NA	NA	3029.33	NA	NA	NA	1551.67	NA	11764	Ap1b1	adaptor protein complex AP-1, beta 1 subunit
1237	NA	NA	NA	NA	1662	NA	3028	NA	11765	Ap1g1	adaptor protein complex AP-1, gamma 1 subunit
1238	NA	NA	NA	NA	NA	NA	NA	NA	11766	Ap1g2	adaptor protein complex AP-1, gamma 2 subunit
1239	3160.67	NA	4116.67	NA	4417.33	NA	3523.67	NA	11767	Ap1m1	adaptor-related protein complex AP-1, mu subunit 1
1240	NA	NA	NA	NA	NA	NA	NA	NA	11768	Ap1m2	adaptor protein complex AP-1, mu 2 subunit
1241	NA	NA	5347.33	NA	NA	NA	1009.33	0.0821733	11769	Ap1s1	adaptor protein complex AP-1, sigma 1
1242	NA	NA	NA	NA	NA	NA	NA	NA	11770	Fabp4	fatty acid binding protein 4, adipocyte
1243	2279.33	NA	NA	NA	2543.67	NA	3905	NA	11771	Ap2a1	adaptor protein complex AP-2, alpha 1 subunit
1244	NA	NA	5369.67	NA	2777.67	NA	NA	NA	11772	Ap2a2	adaptor protein complex AP-2, alpha 2 subunit
1245	3936.33	NA	3729	NA	1982	NA	NA	NA	11774	Ap3b1	adaptor-related protein complex 3, beta 1 subunit
1246	NA	NA	NA	NA	2355.67	NA	2504.33	NA	11775	Ap3b2	adaptor-related protein complex 3, beta 2 subunit
1247	NA	NA	4923.33	NA	3196.33	NA	NA	NA	11776	Ap3d1	adaptor-related protein complex 3, delta 1 subunit
1248	2262.33	NA	4160	NA	5160	NA	3553.67	NA	11778	Ap3s2	adaptor-related protein complex 3, sigma 2 subunit
1249	NA	NA	NA	NA	NA	NA	NA	NA	11781	Ap4m1	adaptor-related protein complex AP-4, mu 1
1250	4117	NA	2400.67	NA	5589.33	NA	2744	NA	11782	Ap4s1	adaptor-related protein complex AP-4, sigma 1
1251	NA	NA	NA	NA	NA	NA	1782.33	NA	11783	Apaf1	apoptotic peptidase activating factor 1
1252	2208.67	NA	3108	NA	NA	NA	NA	NA	11784	Apba2	amyloid beta (A4) precursor protein-binding, family A, member 2
1253	NA	NA	6249.33	NA	1953.67	NA	1392.67	NA	11785	Apbb1	amyloid beta (A4) precursor protein-binding, family B, member 1
1254	NA	NA	6225.67	NA	1200.67	0.0950747	NA	NA	11787	Apbb2	amyloid beta (A4) precursor protein-binding, family B, member 2
1255	NA	NA	NA	NA	NA	NA	NA	NA	11789	Apc	adenomatosis polyposis coli
1256	NA	NA	NA	NA	NA	NA	NA	NA	11790	Speg	SPEG complex locus
1257	3267.67	NA	2786.67	NA	5946.67	NA	2872.67	NA	11792	Apex1	apurinic/apyrimidinic endonuclease 1
1258	3870.67	NA	2032.33	NA	5552.67	NA	3376.33	NA	11793	Atg5	autophagy-related 5 (yeast)
1259	NA	NA	582.667	0.0189156	NA	NA	NA	NA	11796	Birc3	baculoviral IAP repeat-containing 3
1260	2280.33	NA	5730.33	NA	2733	NA	NA	NA	11797	Birc2	baculoviral IAP repeat-containing 2
1261	NA	NA	NA	NA	NA	NA	NA	NA	11798	Xiap	X-linked inhibitor of apoptosis
1262	NA	NA	NA	NA	NA	NA	NA	NA	11799	Birc5	baculoviral IAP repeat-containing 5
1263	3681.33	NA	4700.67	NA	2683.33	NA	NA	NA	11800	Api5	apoptosis inhibitor 5
1264	NA	NA	NA	NA	NA	NA	NA	NA	11801	Cd5l	CD5 antigen-like
1265	4682.33	NA	5189.67	NA	1189.67	0.0935287	3548.33	NA	11803	Aplp1	amyloid beta (A4) precursor-like protein 1
1266	NA	NA	4417.67	NA	1667	NA	NA	NA	11804	Aplp2	amyloid beta (A4) precursor-like protein 2
1267	NA	NA	NA	NA	NA	NA	NA	NA	11806	Apoa1	apolipoprotein A-I
1268	NA	NA	NA	NA	NA	NA	NA	NA	11807	Apoa2	apolipoprotein A-II
1269	NA	NA	NA	NA	NA	NA	NA	NA	11808	Apoa4	apolipoprotein A-IV
1270	NA	NA	NA	NA	NA	NA	NA	NA	11810	Apobec1	apolipoprotein B mRNA editing enzyme, catalytic polypeptide 1
1271	NA	NA	NA	NA	NA	NA	NA	NA	11811	Apobec2	apolipoprotein B mRNA editing enzyme, catalytic polypeptide 2
1272	NA	NA	NA	NA	NA	NA	NA	NA	11812	Apoc1	apolipoprotein C-I
1273	NA	NA	NA	NA	NA	NA	NA	NA	11813	Apoc2	apolipoprotein C-II
1274	NA	NA	147.333	0.000990621	NA	NA	NA	NA	11814	Apoc3	apolipoprotein C-III
1275	NA	NA	NA	NA	191	0.00225558	NA	NA	11815	Apod	apolipoprotein D
1276	NA	NA	519.333	0.0146893	2357.67	NA	NA	NA	11816	Apoe	apolipoprotein E
1277	NA	NA	NA	NA	NA	NA	NA	NA	11818	Apoh	apolipoprotein H
1278	NA	NA	2152.33	NA	NA	NA	NA	NA	11819	Nr2f2	nuclear receptor subfamily 2, group F, member 2
1279	3346.33	NA	6746.67	NA	1302.33	NA	NA	NA	11820	App	amyloid beta (A4) precursor protein
1280	4272.67	NA	1947	NA	NA	NA	2024.33	NA	11821	Aprt	adenine phosphoribosyl transferase
1281	NA	NA	NA	NA	NA	NA	NA	NA	11826	Aqp1	aquaporin 1
1282	NA	NA	NA	NA	NA	NA	NA	NA	11827	Aqp2	aquaporin 2
1283	NA	NA	NA	NA	NA	NA	NA	NA	11828	Aqp3	aquaporin 3
1284	NA	NA	84.3333	0.000342907	NA	NA	NA	NA	11829	Aqp4	aquaporin 4
1285	NA	NA	NA	NA	NA	NA	NA	NA	11830	Aqp5	aquaporin 5
1286	NA	NA	NA	NA	NA	NA	NA	NA	11831	Aqp6	aquaporin 6
1287	NA	NA	NA	NA	NA	NA	NA	NA	11832	Aqp7	aquaporin 7
1288	NA	NA	NA	NA	NA	NA	NA	NA	11833	Aqp8	aquaporin 8
1289	NA	NA	NA	NA	NA	NA	NA	NA	11834	Aqr	aquarius
1290	NA	NA	NA	NA	NA	NA	NA	NA	11835	Ar	androgen receptor
1291	4408	NA	1729.33	NA	2843.67	NA	5140.67	NA	11836	Araf	v-raf murine sarcoma 3611 viral oncogene homolog
1292	NA	NA	NA	NA	2132.33	NA	NA	NA	11838	Arc	activity regulated cytoskeletal-associated protein
1293	NA	NA	NA	NA	NA	NA	NA	NA	11839	Areg	amphiregulin
1294	NA	NA	4595.33	NA	2903.33	NA	1744	NA	11840	Arf1	ADP-ribosylation factor 1
1295	NA	NA	NA	NA	NA	NA	NA	NA	11841	Arf2	ADP-ribosylation factor 2
1296	NA	NA	5834.67	NA	NA	NA	1453.33	NA	11842	Arf3	ADP-ribosylation factor 3
1297	4354.33	NA	2788.67	NA	3525.67	NA	4141.33	NA	11843	Arf4	ADP-ribosylation factor 4
1298	5116	NA	2749	NA	4779	NA	1856.67	NA	11844	Arf5	ADP-ribosylation factor 5
1299	2382	NA	NA	NA	NA	NA	1163	NA	118445	Klf16	Kruppel-like factor 16
1300	2262.33	NA	NA	NA	151.333	0.00139348	NA	NA	118446	Gje1	gap junction membrane channel protein epsilon 1
1301	NA	NA	NA	NA	NA	NA	NA	NA	118449	Synpo2	synaptopodin 2
1302	3156.33	NA	2336.67	NA	5188.33	NA	4166	NA	11845	Arf6	ADP-ribosylation factor 6
1303	3425.67	NA	4309.33	NA	5445.33	NA	1911.67	NA	118451	Mrps2	mitochondrial ribosomal protein S2
1304	4001.33	NA	735.667	0.0306301	NA	NA	2337	NA	118452	Baalc	brain and acute leukemia, cytoplasmic
1305	NA	NA	NA	NA	82.3333	0.000480013	NA	NA	118454	Gjc2	gap junction protein, gamma 2
1306	NA	NA	NA	NA	NA	NA	NA	NA	11846	Arg1	arginase, liver
1307	NA	NA	NA	NA	NA	NA	NA	NA	11847	Arg2	arginase type II
1308	3904	NA	4354.67	NA	1454.33	NA	4776.33	NA	11852	Rhob	ras homolog gene family, member B
1309	1655.33	NA	2139.33	NA	3883	NA	NA	NA	11853	Rhoc	ras homolog gene family, member C
1310	NA	NA	NA	NA	NA	NA	NA	NA	11854	Rhod	ras homolog gene family, member D
1311	4264.67	NA	759.333	0.0326788	3058	NA	NA	NA	11855	Arhgap5	Rho GTPase activating protein 5
1312	NA	NA	NA	NA	NA	NA	NA	NA	11856	Arhgap6	Rho GTPase activating protein 6
1313	NA	NA	NA	NA	NA	NA	NA	NA	11857	Arhgdib	Rho, GDP dissociation inhibitor (GDI) beta
1314	NA	NA	NA	NA	NA	NA	NA	NA	11859	Phox2a	paired-like homeobox 2a
1315	1090.67	0.0767458	5985	NA	NA	NA	NA	NA	11861	Arl4a	ADP-ribosylation factor-like 4A
1316	NA	NA	NA	NA	NA	NA	NA	NA	11863	Arnt	aryl hydrocarbon receptor nuclear translocator
1317	NA	NA	NA	NA	NA	NA	NA	NA	11864	Arnt2	aryl hydrocarbon receptor nuclear translocator 2
1318	NA	NA	3136.33	NA	3827.67	NA	1285	NA	11865	Arntl	aryl hydrocarbon receptor nuclear translocator-like
1319	NA	NA	NA	NA	NA	NA	NA	NA	11870	Art1	ADP-ribosyltransferase 1
1320	NA	NA	NA	NA	NA	NA	NA	NA	11871	Art2a	ADP-ribosyltransferase 2a
1321	NA	NA	NA	NA	NA	NA	NA	NA	11872	Art2b	ADP-ribosyltransferase 2b
1322	NA	NA	NA	NA	NA	NA	NA	NA	11875	Art5	ADP-ribosyltransferase 5
1323	NA	NA	NA	NA	NA	NA	NA	NA	11876	Artn	artemin
1324	633	0.0246607	NA	NA	NA	NA	NA	NA	11877	Arvcf	armadillo repeat gene deleted in velo-cardio-facial syndrome
1325	NA	NA	NA	NA	NA	NA	NA	NA	11878	Arx	aristaless related homeobox
1326	1256	NA	6512	NA	3779.33	NA	3418.33	NA	11881	Arsb	arylsulfatase B
1327	4803	NA	4662.33	NA	1532	NA	3674	NA	11883	Arsa	arylsulfatase A
1328	4540.33	NA	1462.67	NA	4097	NA	4390.67	NA	11886	Asah1	N-acylsphingosine amidohydrolase 1
1329	NA	NA	NA	NA	NA	NA	NA	NA	11889	Asgr1	asialoglycoprotein receptor 1
1330	NA	NA	NA	NA	NA	NA	NA	NA	11890	Asgr2	asialoglycoprotein receptor 2
1331	NA	NA	NA	NA	NA	NA	NA	NA	11891	Rab27a	RAB27A, member RAS oncogene family
1332	2066	NA	4886.33	NA	NA	NA	NA	NA	11899	Astn1	astrotactin 1
1333	NA	NA	NA	NA	NA	NA	NA	NA	11905	Serpinc1	serine (or cysteine) peptidase inhibitor, clade C (antithrombin), member 1
1334	NA	NA	NA	NA	NA	NA	NA	NA	11906	Zfhx3	zinc finger homeobox 3
1335	4310	NA	NA	NA	1878	NA	3227	NA	11907	Ate1	arginyltransferase 1
1336	3120.33	NA	1712.67	NA	5075.33	NA	4651.33	NA	11908	Atf1	activating transcription factor 1
1337	2085	NA	5322	NA	4247.67	NA	3585.33	NA	11909	Atf2	activating transcription factor 2
1338	NA	NA	NA	NA	NA	NA	NA	NA	11910	Atf3	activating transcription factor 3
1339	4314.67	NA	2317.33	NA	5249	NA	2993.67	NA	11911	Atf4	activating transcription factor 4
1340	NA	NA	NA	NA	NA	NA	NA	NA	11920	Atm	ataxia telangiectasia mutated homolog (human)
1341	NA	NA	NA	NA	NA	NA	NA	NA	11921	Atoh1	atonal homolog 1 (Drosophila)
1342	NA	NA	NA	NA	NA	NA	289.667	0.00558539	11922	Neurod6	neurogenic differentiation 6
1343	NA	NA	NA	NA	NA	NA	NA	NA	11923	Neurod4	neurogenic differentiation 4
1344	NA	NA	NA	NA	NA	NA	NA	NA	11924	Neurog2	neurogenin 2
1345	NA	NA	NA	NA	NA	NA	NA	NA	11925	Neurog3	neurogenin 3
1346	4688	NA	1494.67	NA	5508.33	NA	2789	NA	11927	Atox1	ATX1 (antioxidant protein 1) homolog 1 (yeast)
1347	NA	NA	NA	NA	1996.67	NA	1545.67	NA	11928	Atp1a1	ATPase, Na+/K+ transporting, alpha 1 polypeptide
1348	NA	NA	4175	NA	NA	NA	1880.67	NA	11931	Atp1b1	ATPase, Na+/K+ transporting, beta 1 polypeptide
1349	2597.33	NA	522.333	0.0148828	5582.33	NA	NA	NA	11932	Atp1b2	ATPase, Na+/K+ transporting, beta 2 polypeptide
1350	3533	NA	5232.67	NA	567.667	0.0217691	NA	NA	11933	Atp1b3	ATPase, Na+/K+ transporting, beta 3 polypeptide
1351	NA	NA	NA	NA	NA	NA	NA	NA	11936	Fxyd2	FXYD domain-containing ion transport regulator 2
1352	NA	NA	NA	NA	NA	NA	NA	NA	11937	Atp2a1	ATPase, Ca++ transporting, cardiac muscle, fast twitch 1
1353	NA	NA	6417.33	NA	NA	NA	2013	NA	11938	Atp2a2	ATPase, Ca++ transporting, cardiac muscle, slow twitch 2
1354	NA	NA	NA	NA	NA	NA	NA	NA	11941	Atp2b2	ATPase, Ca++ transporting, plasma membrane 2
1355	NA	NA	NA	NA	NA	NA	NA	NA	11944	Atp4a	ATPase, H+/K+ exchanging, gastric, alpha polypeptide
1356	NA	NA	NA	NA	NA	NA	NA	NA	11945	Atp4b	ATPase, H+/K+ exchanging, beta polypeptide
1357	4308	NA	3701.33	NA	4075	NA	3015.67	NA	11946	Atp5a1	ATP synthase, H+ transporting, mitochondrial F1 complex, alpha subunit, isoform 1
1358	NA	NA	3508.33	NA	3144	NA	3396.33	NA	11947	Atp5b	ATP synthase, H+ transporting mitochondrial F1 complex, beta subunit
1359	NA	NA	NA	NA	NA	NA	744	0.0443323	11951	Atp5g1	ATP synthase, H+ transporting, mitochondrial F0 complex, subunit c (subunit 9), isoform 1
1360	3905.33	NA	1938.33	NA	5542.67	NA	3421	NA	11957	Atp5j	ATP synthase, H+ transporting, mitochondrial F0 complex, subunit F
1361	NA	NA	1577	NA	NA	NA	2477.67	NA	11958	Atp5k	ATP synthase, H+ transporting, mitochondrial F1F0 complex, subunit e
1362	NA	NA	6580.67	NA	2153.67	NA	2270	NA	11964	Atp6v1a	ATPase, H+ transporting, lysosomal V1 subunit A
1363	NA	NA	6581.67	NA	2763	NA	1313	NA	11966	Atp6v1b2	ATPase, H+ transporting, lysosomal V1 subunit B2
1364	4287	NA	4935.67	NA	3280.33	NA	2657	NA	11972	Atp6v0d1	ATPase, H+ transporting, lysosomal V0 subunit D1
1365	NA	NA	3514.67	NA	4403.67	NA	2856.33	NA	11973	Atp6v1e1	ATPase, H+ transporting, lysosomal V1 subunit E1
1366	2447.67	NA	1084.33	0.0663819	4515.33	NA	NA	NA	11974	Atp6v0e	ATPase, H+ transporting, lysosomal V0 subunit E
1367	NA	NA	NA	NA	2815.67	NA	2235.67	NA	11975	Atp6v0a1	ATPase, H+ transporting, lysosomal V0 subunit A1
1368	1024	0.0676332	NA	NA	2769	NA	NA	NA	11977	Atp7a	ATPase, Cu++ transporting, alpha polypeptide
1369	NA	NA	NA	NA	NA	NA	NA	NA	11979	Atp7b	ATPase, Cu++ transporting, beta polypeptide
1370	NA	NA	6650.67	NA	601.667	0.0243988	NA	NA	11980	Atp8a1	ATPase, aminophospholipid transporter (APLT), class I, type 8A, member 1
1371	3459.67	NA	NA	NA	2280.33	NA	2021.67	NA	11981	Atp9a	ATPase, class II, type 9A
1372	NA	NA	NA	NA	NA	NA	NA	NA	11982	Atp10a	ATPase, class V, type 10A
1373	NA	NA	4343	NA	4545.33	NA	1336	NA	11983	Atpif1	ATPase inhibitory factor 1
1374	NA	NA	NA	NA	NA	NA	NA	NA	11987	Slc7a1	solute carrier family 7 (cationic amino acid transporter, y+ system), member 1
1375	NA	NA	448.333	0.0106331	NA	NA	NA	NA	11988	Slc7a2	solute carrier family 7 (cationic amino acid transporter, y+ system), member 2
1376	431.667	0.0108568	NA	NA	NA	NA	NA	NA	11989	Slc7a3	solute carrier family 7 (cationic amino acid transporter, y+ system), member 3
1377	NA	NA	NA	NA	782	0.0416712	NA	NA	11990	Atrn	attractin
1378	1419	NA	5792.33	NA	NA	NA	NA	NA	11991	Hnrnpd	heterogeneous nuclear ribonucleoprotein D
1379	5032	NA	5277	NA	1919.33	NA	2422.67	NA	11992	Auh	AU RNA binding protein/enoyl-coenzyme A hydratase
1380	5044	NA	2676.67	NA	2861	NA	4011.33	NA	11993	Aup1	ancient ubiquitous protein 1
1381	NA	NA	NA	NA	NA	NA	NA	NA	11994	Pcdh15	protocadherin 15
1382	NA	NA	NA	NA	NA	NA	NA	NA	11997	Akr1b7	aldo-keto reductase family 1, member B7
1383	NA	NA	NA	NA	NA	NA	NA	NA	11998	Avp	arginine vasopressin
1384	NA	NA	NA	NA	NA	NA	NA	NA	12000	Avpr2	arginine vasopressin receptor 2
1385	2087.33	NA	NA	NA	1940.33	NA	NA	NA	12005	Axin1	axin 1
1386	1448	NA	3185.33	NA	NA	NA	NA	NA	12006	Axin2	axin2
1387	NA	NA	NA	NA	NA	NA	NA	NA	12007	Azgp1	alpha-2-glycoprotein 1, zinc
1388	3361	NA	NA	NA	2893.33	NA	2429	NA	12009	Azi1	5-azacytidine induced gene 1
1389	3130.33	NA	1253.67	0.0872509	5859	NA	4157.33	NA	12010	B2m	beta-2 microglobulin
1390	NA	NA	NA	NA	NA	NA	NA	NA	12012	Baat	bile acid-Coenzyme A: amino acid N-acyltransferase
1391	NA	NA	NA	NA	862.667	0.0504752	NA	NA	12013	Bach1	BTB and CNC homology 1
1392	NA	NA	NA	NA	1124.33	0.0842527	NA	NA	12014	Bach2	BTB and CNC homology 2
1393	3416.67	NA	1986.67	NA	6044.67	NA	3208.33	NA	12015	Bad	BCL2-associated agonist of cell death
1394	NA	NA	2922.67	NA	NA	NA	1843	NA	12017	Bag1	BCL2-associated athanogene 1
1395	NA	NA	NA	NA	NA	NA	NA	NA	12018	Bak1	BCL2-antagonist/killer 1
1396	NA	NA	NA	NA	NA	NA	NA	NA	12020	Nkx3-2	NK3 homeobox 2
1397	NA	NA	NA	NA	NA	NA	NA	NA	12021	Bard1	BRCA1 associated RING domain 1
1398	NA	NA	NA	NA	NA	NA	NA	NA	12022	Barx1	BarH-like homeobox 1
1399	NA	NA	NA	NA	NA	NA	NA	NA	12023	Barx2	BarH-like homeobox 2
1400	3185.33	NA	3718.67	NA	4000.67	NA	4150	NA	12028	Bax	BCL2-associated X protein
1401	221.333	0.0024754	NA	NA	NA	NA	NA	NA	12029	Bcl6b	B-cell CLL/lymphoma 6, member B
1402	1969.67	NA	622.667	0.021568	4422	NA	NA	NA	12032	Bcan	brevican
1403	4932.33	NA	2415.67	NA	4415.33	NA	2996	NA	12033	Bcap29	B-cell receptor-associated protein 29
1404	3469.67	NA	3455.33	NA	4802	NA	3411.33	NA	12034	Phb2	prohibitin 2
1405	919	0.0541127	NA	NA	3362.67	NA	3174.67	NA	12035	Bcat1	branched chain aminotransferase 1, cytosolic
1406	NA	NA	NA	NA	NA	NA	NA	NA	12036	Bcat2	branched chain aminotransferase 2, mitochondrial
1407	NA	NA	NA	NA	NA	NA	NA	NA	12038	Bche	butyrylcholinesterase
1408	4050.33	NA	1841.33	NA	3069.33	NA	5216	NA	12039	Bckdha	branched chain ketoacid dehydrogenase E1, alpha polypeptide
1409	5328	NA	2728	NA	3293.67	NA	3248.33	NA	12040	Bckdhb	branched chain ketoacid dehydrogenase E1, beta polypeptide
1410	5268.67	NA	2452.67	NA	3477.33	NA	3398	NA	12041	Bckdk	branched chain ketoacid dehydrogenase kinase
1411	2620.67	NA	2325	NA	4059.33	NA	5320.33	NA	12042	Bcl10	B-cell leukemia/lymphoma 10
1412	NA	NA	662.667	0.0246131	NA	NA	NA	NA	12043	Bcl2	B-cell leukemia/lymphoma 2
1413	NA	NA	NA	NA	NA	NA	NA	NA	12048	Bcl2l1	BCL2-like 1
1414	NA	NA	NA	NA	NA	NA	NA	NA	12049	Bcl2l10	Bcl2-like 10
1415	NA	NA	NA	NA	NA	NA	NA	NA	12050	Bcl2l2	BCL2-like 2
1416	NA	NA	NA	NA	NA	NA	NA	NA	12051	Bcl3	B-cell leukemia/lymphoma 3
1417	2642.33	NA	3224.67	NA	5212.33	NA	3916.33	NA	12053	Bcl6	B-cell leukemia/lymphoma 6
1418	2600.67	NA	5276.33	NA	2520	NA	4488.67	NA	12055	Bcl7c	B-cell CLL/lymphoma 7C
1419	NA	NA	NA	NA	NA	NA	NA	NA	12057	Opn1sw	opsin 1 (cone pigments), short-wave-sensitive (color blindness, tritan)
1420	NA	NA	NA	NA	NA	NA	NA	NA	12061	Bdkrb1	bradykinin receptor, beta 1
1421	NA	NA	NA	NA	NA	NA	NA	NA	12062	Bdkrb2	bradykinin receptor, beta 2
1422	NA	NA	NA	NA	NA	NA	191.333	0.00226996	12064	Bdnf	brain derived neurotrophic factor
1423	2524.67	NA	3165	NA	2850.33	NA	5528	NA	12068	Bet1	blocked early in transport 1 homolog (S. cerevisiae)
1424	NA	NA	5444.67	NA	NA	NA	544.333	0.0224114	12069	Bex2	brain expressed X-linked 2
1425	NA	NA	4184.33	NA	NA	NA	1692.33	NA	12070	Ngfrap1	nerve growth factor receptor (TNFRSF16) associated protein 1
1426	NA	NA	NA	NA	NA	NA	NA	NA	12075	Bfsp1	beaded filament structural protein 1, in lens-CP94
1427	3487	NA	NA	NA	4613.33	NA	1489	NA	12091	Glb1	galactosidase, beta 1
1428	73	0.000285036	NA	NA	NA	NA	NA	NA	121021	Cspg4	chondroitin sulfate proteoglycan 4
1429	5191.33	NA	1503.33	NA	4438	NA	3320.33	NA	121022	Mrps6	mitochondrial ribosomal protein S6
1430	1465	NA	NA	NA	NA	NA	NA	NA	12111	Bgn	biglycan
1431	2724	NA	NA	NA	2673	NA	NA	NA	12121	Bicd1	bicaudal D homolog 1 (Drosophila)
1432	NA	NA	NA	NA	NA	NA	NA	NA	12122	Bid	BH3 interacting domain death agonist
1433	NA	NA	NA	NA	NA	NA	759	0.046391	12123	Hrk	harakiri, BCL2 interacting protein (contains only BH3 domain)
1434	NA	NA	NA	NA	NA	NA	NA	NA	12124	Bik	BCL2-interacting killer
1435	NA	NA	NA	NA	NA	NA	NA	NA	12125	Bcl2l11	BCL2-like 11 (apoptosis facilitator)
1436	1708	NA	862	0.0423329	NA	NA	NA	NA	12140	Fabp7	fatty acid binding protein 7, brain
1437	NA	NA	NA	NA	NA	NA	NA	NA	12142	Prdm1	PR domain containing 1, with ZNF domain
1438	NA	NA	NA	NA	NA	NA	NA	NA	12143	Blk	B lymphoid kinase
1439	1605.67	NA	NA	NA	1304.33	NA	NA	NA	12144	Blm	Bloom syndrome homolog (human)
1440	NA	NA	NA	NA	NA	NA	NA	NA	12145	Cxcr5	chemochine (C-X-C motif) receptor 5
1441	1544	NA	5343	NA	3073.33	NA	NA	NA	12151	Bmi1	Bmi1 polycomb ring finger oncogene
1442	NA	NA	NA	NA	NA	NA	NA	NA	12153	Bmp1	bone morphogenetic protein 1
1443	NA	NA	NA	NA	NA	NA	NA	NA	12154	Bmp10	bone morphogenetic protein 10
1444	NA	NA	NA	NA	NA	NA	NA	NA	12155	Bmp15	bone morphogenetic protein 15
1445	1242.33	0.0994876	NA	NA	2909.67	NA	3537.33	NA	12156	Bmp2	bone morphogenetic protein 2
1446	34.3333	6.6169e-05	NA	NA	NA	NA	NA	NA	12159	Bmp4	bone morphogenetic protein 4
1447	NA	NA	NA	NA	NA	NA	NA	NA	12160	Bmp5	bone morphogenetic protein 5
1448	NA	NA	NA	NA	NA	NA	NA	NA	12162	Bmp7	bone morphogenetic protein 7
1449	NA	NA	NA	NA	NA	NA	NA	NA	12163	Bmp8a	bone morphogenetic protein 8a
1450	NA	NA	NA	NA	NA	NA	NA	NA	12164	Bmp8b	bone morphogenetic protein 8b
1451	NA	NA	NA	NA	NA	NA	NA	NA	12165	Gdf2	growth differentiation factor 2
1452	2485	NA	926.667	0.0489552	NA	NA	NA	NA	12166	Bmpr1a	bone morphogenetic protein receptor, type 1A
1453	NA	NA	238.667	0.00271102	NA	NA	NA	NA	12167	Bmpr1b	bone morphogenetic protein receptor, type 1B
1454	NA	NA	959.667	0.0522714	NA	NA	NA	NA	12168	Bmpr2	bone morphogenic protein receptor, type II (serine/threonine kinase)
1455	NA	NA	NA	NA	NA	NA	NA	NA	12169	Bmx	BMX non-receptor tyrosine kinase
1456	NA	NA	NA	NA	NA	NA	NA	NA	12173	Bnc1	basonuclin 1
1457	2373.67	NA	1599.33	NA	4580.33	NA	NA	NA	12175	Bnip2	BCL2/adenovirus E1B interacting protein 2
1458	3261	NA	6075	NA	1039	0.0726023	4162.67	NA	12177	Bnip3l	BCL2/adenovirus E1B interacting protein 3-like
1459	NA	NA	NA	NA	NA	NA	NA	NA	12180	Smyd1	SET and MYND domain containing 1
1460	4204	NA	6182.33	NA	2524	NA	2037.67	NA	12181	Bop1	block of proliferation 1
1461	NA	NA	NA	NA	NA	NA	NA	NA	12182	Bst1	bone marrow stromal cell antigen 1
1462	3872	NA	3788.33	NA	1110	0.0822042	5287.33	NA	12183	Bpgm	2,3-bisphosphoglycerate mutase
1463	NA	NA	NA	NA	NA	NA	NA	NA	12189	Brca1	breast cancer 1
1464	NA	NA	NA	NA	NA	NA	NA	NA	12190	Brca2	breast cancer 2
1465	1378.33	NA	1172.33	0.0770032	NA	NA	NA	NA	12192	Zfp36l1	zinc finger protein 36, C3H type-like 1
1466	NA	NA	NA	NA	NA	NA	NA	NA	12193	Zfp36l2	zinc finger protein 36, C3H type-like 2
1467	NA	NA	NA	NA	NA	NA	NA	NA	12209	Brs3	bombesin-like receptor 3
1468	NA	NA	NA	NA	NA	NA	NA	NA	12211	Birc6	baculoviral IAP repeat-containing 6
1469	NA	NA	NA	NA	NA	NA	NA	NA	12212	Chic1	cysteine-rich hydrophobic domain 1
1470	NA	NA	3059.33	NA	4216.33	NA	1538	NA	12215	Bsg	basigin
1471	NA	NA	NA	NA	NA	NA	NA	NA	12217	Bsn	bassoon
1472	NA	NA	NA	NA	NA	NA	NA	NA	12223	Btc	betacellulin, epidermal growth factor family member
1473	NA	NA	NA	NA	NA	NA	1028	0.0849302	12224	Klf5	Kruppel-like factor 5
1474	NA	NA	1703.67	NA	NA	NA	1991	NA	12227	Btg2	B-cell translocation gene 2, anti-proliferative
1475	NA	NA	NA	NA	NA	NA	NA	NA	12229	Btk	Bruton agammaglobulinemia tyrosine kinase
1476	NA	NA	NA	NA	NA	NA	NA	NA	12231	Btn1a1	butyrophilin, subfamily 1, member A1
1477	NA	NA	NA	NA	2913	NA	1361.67	NA	12234	Btrc	beta-transducin repeat containing protein
1478	NA	NA	NA	NA	NA	NA	NA	NA	12235	Bub1	budding uninhibited by benzimidazoles 1 homolog (S. cerevisiae)
1479	413.333	0.00982355	NA	NA	NA	NA	NA	NA	12236	Bub1b	budding uninhibited by benzimidazoles 1 homolog, beta (S. cerevisiae)
1480	3496.67	NA	6498.67	NA	1514.67	NA	3319.67	NA	12237	Bub3	budding uninhibited by benzimidazoles 3 homolog (S. cerevisiae)
1481	5054.33	NA	2882.67	NA	3445.67	NA	3368	NA	12238	Commd3	COMM domain containing 3
1482	NA	NA	399.333	0.0083602	NA	NA	NA	NA	12257	Tspo	translocator protein
1483	NA	NA	NA	NA	NA	NA	NA	NA	12258	Serping1	serine (or cysteine) peptidase inhibitor, clade G, member 1
1484	NA	NA	NA	NA	NA	NA	NA	NA	12259	C1qa	complement component 1, q subcomponent, alpha polypeptide
1485	NA	NA	NA	NA	NA	NA	NA	NA	12260	C1qb	complement component 1, q subcomponent, beta polypeptide
1486	3563.33	NA	3081.33	NA	4971.67	NA	3458.33	NA	12261	C1qbp	complement component 1, q subcomponent binding protein
1487	NA	NA	NA	NA	NA	NA	NA	NA	12262	C1qc	complement component 1, q subcomponent, C chain
1488	NA	NA	330.333	0.00544402	NA	NA	NA	NA	12263	C2	complement component 2 (within H-2S)
1489	NA	NA	NA	NA	NA	NA	NA	NA	12265	Ciita	class II transactivator
1490	NA	NA	NA	NA	NA	NA	NA	NA	12266	C3	complement component 3
1491	NA	NA	NA	NA	NA	NA	NA	NA	12267	C3ar1	complement component 3a receptor 1
1492	NA	NA	NA	NA	NA	NA	NA	NA	12269	C4bp	complement component 4 binding protein
1493	NA	NA	NA	NA	NA	NA	NA	NA	12273	C5ar1	complement component 5a receptor 1
1494	NA	NA	NA	NA	NA	NA	NA	NA	12274	C6	complement component 6
1495	NA	NA	NA	NA	NA	NA	NA	NA	12279	C9	complement component 9
1496	NA	NA	NA	NA	NA	NA	NA	NA	12282	Hyou1	hypoxia up-regulated 1
1497	3535.67	NA	2159.33	NA	4226.67	NA	NA	NA	12283	Cab39	calcium binding protein 39
1498	NA	NA	NA	NA	NA	NA	NA	NA	12286	Cacna1a	calcium channel, voltage-dependent, P/Q type, alpha 1A subunit
1499	NA	NA	NA	NA	NA	NA	NA	NA	12287	Cacna1b	calcium channel, voltage-dependent, N type, alpha 1B subunit
1500	NA	NA	NA	NA	NA	NA	NA	NA	12289	Cacna1d	calcium channel, voltage-dependent, L type, alpha 1D subunit
1501	NA	NA	NA	NA	NA	NA	NA	NA	12290	Cacna1e	calcium channel, voltage-dependent, R type, alpha 1E subunit
1502	NA	NA	NA	NA	NA	NA	NA	NA	12291	Cacna1g	calcium channel, voltage-dependent, T type, alpha 1G subunit
1503	NA	NA	NA	NA	NA	NA	NA	NA	12292	Cacna1s	calcium channel, voltage-dependent, L type, alpha 1S subunit
1504	NA	NA	NA	NA	NA	NA	NA	NA	12293	Cacna2d1	calcium channel, voltage-dependent, alpha2/delta subunit 1
1505	NA	NA	NA	NA	NA	NA	479.333	0.0170838	12294	Cacna2d3	calcium channel, voltage-dependent, alpha2/delta subunit 3
1506	NA	NA	NA	NA	NA	NA	NA	NA	12295	Cacnb1	calcium channel, voltage-dependent, beta 1 subunit
1507	NA	NA	NA	NA	NA	NA	281.667	0.00525421	12296	Cacnb2	calcium channel, voltage-dependent, beta 2 subunit
1508	NA	NA	NA	NA	NA	NA	601	0.0277784	12297	Cacnb3	calcium channel, voltage-dependent, beta 3 subunit
1509	NA	NA	NA	NA	NA	NA	NA	NA	12298	Cacnb4	calcium channel, voltage-dependent, beta 4 subunit
1510	NA	NA	NA	NA	NA	NA	NA	NA	12299	Cacng1	calcium channel, voltage-dependent, gamma subunit 1
1511	NA	NA	NA	NA	NA	NA	NA	NA	12300	Cacng2	calcium channel, voltage-dependent, gamma subunit 2
1512	3463.67	NA	4203	NA	4653.33	NA	2941	NA	12301	Cacybp	calcyclin binding protein
1513	NA	NA	NA	NA	NA	NA	NA	NA	12304	Pdia4	protein disulfide isomerase associated 4
1514	2806.33	NA	4114	NA	827	0.0466367	NA	NA	12305	Ddr1	discoidin domain receptor family, member 1
1515	NA	NA	1400.33	NA	2704.67	NA	NA	NA	12306	Anxa2	annexin A2
1516	NA	NA	NA	NA	NA	NA	468	0.0161976	12307	Calb1	calbindin 1
1517	741.667	0.0346488	NA	NA	NA	NA	2122.67	NA	12308	Calb2	calbindin 2
1518	NA	NA	NA	NA	NA	NA	NA	NA	12309	S100g	S100 calcium binding protein G
1519	NA	NA	NA	NA	NA	NA	NA	NA	12310	Calca	calcitonin/calcitonin-related polypeptide, alpha
1520	NA	NA	NA	NA	NA	NA	NA	NA	12311	Calcr	calcitonin receptor
1521	NA	NA	4532.33	NA	NA	NA	2180	NA	12313	Calm1	calmodulin 1
1522	NA	NA	4609.67	NA	3875.33	NA	2301.67	NA	12315	Calm3	calmodulin 3
1523	NA	NA	NA	NA	NA	NA	NA	NA	12316	Aspm	asp (abnormal spindle)-like, microcephaly associated (Drosophila)
1524	3222.67	NA	5056.67	NA	4673.67	NA	2383	NA	12317	Calr	calreticulin
1525	1045.33	0.0705056	1530.33	NA	NA	NA	NA	NA	12319	Car8	carbonic anhydrase 8
1526	3907	NA	2342	NA	3181	NA	5021	NA	12321	Calu	calumenin
1527	NA	NA	NA	NA	NA	NA	NA	NA	12322	Camk2a	calcium/calmodulin-dependent protein kinase II alpha
1528	NA	NA	NA	NA	NA	NA	845	0.0578965	12323	Camk2b	calcium/calmodulin-dependent protein kinase II, beta
1529	NA	NA	2850.33	NA	NA	NA	NA	NA	12325	Camk2g	calcium/calmodulin-dependent protein kinase II gamma
1530	NA	NA	NA	NA	NA	NA	NA	NA	12326	Camk4	calcium/calmodulin-dependent protein kinase IV
1531	3228	NA	5079.33	NA	4464.33	NA	2575.33	NA	12328	Caml	calcium modulating ligand
1532	3940.33	NA	4061.33	NA	1839.67	NA	4740	NA	12330	Canx	calnexin
1533	NA	NA	3778.67	NA	1540.33	NA	3571	NA	12331	Cap1	CAP, adenylate cyclase-associated protein 1 (yeast)
1534	NA	NA	NA	NA	NA	NA	NA	NA	12332	Capg	capping protein (actin filament), gelsolin-like
1535	NA	NA	NA	NA	NA	NA	NA	NA	12333	Capn1	calpain 1
1536	3676	NA	1675.33	NA	2921.67	NA	NA	NA	12334	Capn2	calpain 2
1537	NA	NA	NA	NA	NA	NA	NA	NA	12335	Capn3	calpain 3
1538	4980.33	NA	2387.33	NA	3264.67	NA	3987.33	NA	12336	Capns1	calpain, small subunit 1
1539	1947.67	NA	NA	NA	1956	NA	NA	NA	12337	Capn5	calpain 5
1540	NA	NA	NA	NA	NA	NA	NA	NA	12338	Capn6	calpain 6
1541	3292	NA	5598.67	NA	3573.33	NA	2867.67	NA	12339	Capn7	calpain 7
1542	4139.33	NA	2560.33	NA	4810	NA	3436	NA	12343	Capza2	capping protein (actin filament) muscle Z-line, alpha 2
1543	NA	NA	NA	NA	NA	NA	NA	NA	12344	Capza3	capping protein (actin filament) muscle Z-line, alpha 3
1544	4153.67	NA	3955.67	NA	4696.67	NA	2328.67	NA	12345	Capzb	capping protein (actin filament) muscle Z-line, beta
1545	NA	NA	NA	NA	NA	NA	NA	NA	12346	Car1	carbonic anhydrase 1
1546	NA	NA	6127.67	NA	NA	NA	1123.33	NA	12348	Car11	carbonic anhydrase 11
1547	3869.67	NA	2201	NA	1188.33	0.0933312	NA	NA	12349	Car2	carbonic anhydrase 2
1548	NA	NA	NA	NA	NA	NA	NA	NA	12350	Car3	carbonic anhydrase 3
1549	NA	NA	NA	NA	NA	NA	163.333	0.00160043	12351	Car4	carbonic anhydrase 4
1550	NA	NA	NA	NA	NA	NA	NA	NA	12352	Car5a	carbonic anhydrase 5a, mitochondrial
1551	NA	NA	NA	NA	NA	NA	NA	NA	12353	Car6	carbonic anhydrase 6
1552	NA	NA	NA	NA	NA	NA	472.333	0.0165646	12354	Car7	carbonic anhydrase 7
1553	NA	NA	NA	NA	NA	NA	NA	NA	12355	Nr1i3	nuclear receptor subfamily 1, group I, member 3
1554	3720.67	NA	2323	NA	2282.33	NA	5511.33	NA	12359	Cat	catalase
1555	992.667	0.0635833	5960.67	NA	NA	NA	NA	NA	12361	Cask	calcium/calmodulin-dependent serine protein kinase (MAGUK family)
1556	NA	NA	NA	NA	NA	NA	NA	NA	12362	Casp1	caspase 1
1557	NA	NA	NA	NA	NA	NA	NA	NA	12363	Casp4	caspase 4, apoptosis-related cysteine peptidase
1558	NA	NA	NA	NA	NA	NA	NA	NA	12364	Casp12	caspase 12
1559	NA	NA	NA	NA	NA	NA	NA	NA	12365	Casp14	caspase 14
1560	1361	NA	5154.67	NA	2992.67	NA	5036.33	NA	12366	Casp2	caspase 2
1561	NA	NA	NA	NA	NA	NA	NA	NA	12367	Casp3	caspase 3
1562	NA	NA	545	0.0163746	NA	NA	NA	NA	12368	Casp6	caspase 6
1563	1313.33	NA	2181	NA	NA	NA	NA	NA	12369	Casp7	caspase 7
1564	NA	NA	NA	NA	NA	NA	NA	NA	12370	Casp8	caspase 8
1565	4083	NA	3071.33	NA	4313.67	NA	3552.33	NA	12371	Casp9	caspase 9
1566	NA	NA	NA	NA	NA	NA	NA	NA	12373	Casq2	calsequestrin 2
1567	NA	NA	NA	NA	NA	NA	NA	NA	12374	Casr	calcium-sensing receptor
1568	NA	NA	NA	NA	NA	NA	NA	NA	12380	Cast	calpastatin
1569	4512.33	NA	2776.67	NA	1957	NA	5013	NA	12385	Ctnna1	catenin (cadherin associated protein), alpha 1
1570	2439.33	NA	6655	NA	4143	NA	1942	NA	12386	Ctnna2	catenin (cadherin associated protein), alpha 2
1571	3792.33	NA	5867	NA	1744	NA	NA	NA	12387	Ctnnb1	catenin (cadherin associated protein), beta 1
1572	1357	NA	4438	NA	2332.67	NA	NA	NA	12388	Ctnnd1	catenin (cadherin associated protein), delta 1
1573	94.3333	0.00045979	2831.67	NA	NA	NA	NA	NA	12389	Cav1	caveolin 1, caveolae protein
1574	1231	0.0976569	2884.33	NA	NA	NA	3770	NA	12390	Cav2	caveolin 2
1575	NA	NA	NA	NA	NA	NA	NA	NA	12391	Cav3	caveolin 3
1576	NA	NA	NA	NA	NA	NA	NA	NA	12393	Runx2	runt related transcription factor 2
1577	NA	NA	NA	NA	NA	NA	NA	NA	12394	Runx1	runt related transcription factor 1
1578	NA	NA	NA	NA	NA	NA	NA	NA	12395	Runx1t1	runt-related transcription factor 1; translocated to, 1 (cyclin D-related)
1579	NA	NA	3408.67	NA	NA	NA	2112	NA	12396	Cbfa2t2	core-binding factor, runt domain, alpha subunit 2, translocated to, 2 (human)
1580	NA	NA	NA	NA	NA	NA	NA	NA	12398	Cbfa2t3	core-binding factor, runt domain, alpha subunit 2, translocated to, 3 (human)
1581	NA	NA	NA	NA	NA	NA	NA	NA	12399	Runx3	runt related transcription factor 3
1582	1552	NA	2931	NA	4142	NA	NA	NA	12400	Cbfb	core binding factor beta
1583	NA	NA	NA	NA	NA	NA	NA	NA	12401	Serpina6	serine (or cysteine) peptidase inhibitor, clade A, member 6
1584	NA	NA	NA	NA	NA	NA	NA	NA	12402	Cbl	Casitas B-lineage lymphoma
1585	NA	NA	NA	NA	NA	NA	116.667	0.000767991	12404	Cbln1	cerebellin 1 precursor protein
1586	NA	NA	NA	NA	NA	NA	378.667	0.0102059	12405	Cbln2	cerebellin 2 precursor protein
1587	NA	NA	281	0.00379689	NA	NA	NA	NA	12406	Serpinh1	serine (or cysteine) peptidase inhibitor, clade H, member 1
1588	NA	NA	3314.67	NA	5170.33	NA	2311	NA	12408	Cbr1	carbonyl reductase 1
1589	NA	NA	NA	NA	NA	NA	NA	NA	12409	Cbr2	carbonyl reductase 2
1590	NA	NA	207	0.00202521	NA	NA	NA	NA	12411	Cbs	cystathionine beta-synthase
1591	3301.33	NA	NA	NA	3972	NA	2985	NA	12412	Cbx1	chromobox homolog 1 (Drosophila HP1 beta)
1592	NA	NA	NA	NA	NA	NA	NA	NA	12416	Cbx2	chromobox homolog 2 (Drosophila Pc class)
1593	NA	NA	5611	NA	1538	NA	2246	NA	12418	Cbx4	chromobox homolog 4 (Drosophila Pc class)
1594	NA	NA	2339	NA	NA	NA	NA	NA	12419	Cbx5	chromobox homolog 5 (Drosophila HP1a)
1595	2346	NA	3379	NA	4020.33	NA	NA	NA	12421	Rb1cc1	RB1-inducible coiled-coil 1
1596	NA	NA	NA	NA	NA	NA	460	0.0156194	12424	Cck	cholecystokinin
1597	NA	NA	NA	NA	NA	NA	NA	NA	12425	Cckar	cholecystokinin A receptor
1598	NA	NA	NA	NA	NA	NA	244	0.00387039	12426	Cckbr	cholecystokinin B receptor
1599	NA	NA	NA	NA	NA	NA	NA	NA	12427	Ccna1	cyclin A1
1600	150.667	0.00111809	NA	NA	NA	NA	NA	NA	12428	Ccna2	cyclin A2
1601	271	0.00389718	NA	NA	NA	NA	NA	NA	12442	Ccnb2	cyclin B2
1602	261.333	0.00357143	4381	NA	NA	NA	NA	NA	12443	Ccnd1	cyclin D1
1603	NA	NA	1745	NA	NA	NA	NA	NA	12444	Ccnd2	cyclin D2
1604	1907.33	NA	1919.33	NA	4879.67	NA	NA	NA	12445	Ccnd3	cyclin D3
1605	NA	NA	5535.67	NA	NA	NA	778	0.0489116	12447	Ccne1	cyclin E1
1606	676.667	0.0284968	NA	NA	NA	NA	2138.33	NA	12448	Ccne2	cyclin E2
1607	NA	NA	NA	NA	NA	NA	NA	NA	12449	Ccnf	cyclin F
1608	3767.67	NA	2571.33	NA	5295	NA	3337.33	NA	12450	Ccng1	cyclin G1
1609	NA	NA	5582.33	NA	2013	NA	2981	NA	12452	Ccng2	cyclin G2
1610	2933.67	NA	4882	NA	4420	NA	3094	NA	12453	Ccni	cyclin I
1611	NA	NA	NA	NA	NA	NA	NA	NA	12454	Ccnk	cyclin K
1612	NA	NA	NA	NA	NA	NA	NA	NA	12455	Ccnt1	cyclin T1
1613	NA	NA	4969	NA	NA	NA	1387.67	NA	12457	Ccrn4l	CCR4 carbon catabolite repression 4-like (S. cerevisiae)
1614	NA	NA	NA	NA	NA	NA	NA	NA	12458	Ccr6	chemokine (C-C motif) receptor 6
1615	4720.33	NA	1349	NA	3357.67	NA	4781.67	NA	12460	Ccs	copper chaperone for superoxide dismutase
1616	NA	NA	5050	NA	3004	NA	3198	NA	12461	Cct2	chaperonin containing Tcp1, subunit 2 (beta)
1617	2882.67	NA	4334	NA	3677.67	NA	4188	NA	12462	Cct3	chaperonin containing Tcp1, subunit 3 (gamma)
1618	2881	NA	5828	NA	3596.33	NA	3033	NA	12464	Cct4	chaperonin containing Tcp1, subunit 4 (delta)
1619	3479.67	NA	5776	NA	2858	NA	3117	NA	12465	Cct5	chaperonin containing Tcp1, subunit 5 (epsilon)
1620	NA	NA	NA	NA	NA	NA	NA	NA	12467	Cct6b	chaperonin containing Tcp1, subunit 6b (zeta)
1621	3627.67	NA	5606.67	NA	2504.67	NA	3386	NA	12468	Cct7	chaperonin containing Tcp1, subunit 7 (eta)
1622	3689	NA	5198	NA	2032	NA	3997	NA	12469	Cct8	chaperonin containing Tcp1, subunit 8 (theta)
1623	NA	NA	NA	NA	NA	NA	NA	NA	12475	Cd14	CD14 antigen
1624	2800.33	NA	1388.33	NA	4512.33	NA	5349	NA	12476	Cd151	CD151 antigen
1625	NA	NA	NA	NA	NA	NA	NA	NA	12477	Ctla4	cytotoxic T-lymphocyte-associated protein 4
1626	NA	NA	NA	NA	NA	NA	NA	NA	12478	Cd19	CD19 antigen
1627	NA	NA	NA	NA	NA	NA	NA	NA	12479	Cd1d1	CD1d1 antigen
1628	NA	NA	NA	NA	NA	NA	NA	NA	12481	Cd2	CD2 antigen
1629	NA	NA	NA	NA	NA	NA	NA	NA	12482	Ms4a1	membrane-spanning 4-domains, subfamily A, member 1
1630	NA	NA	NA	NA	NA	NA	NA	NA	12483	Cd22	CD22 antigen
1631	NA	NA	NA	NA	NA	NA	NA	NA	12484	Cd24a	CD24a antigen
1632	NA	NA	NA	NA	NA	NA	NA	NA	12487	Cd28	CD28 antigen
1633	NA	NA	NA	NA	NA	NA	NA	NA	12488	Cd2ap	CD2-associated protein
1634	NA	NA	NA	NA	NA	NA	NA	NA	12489	Cd33	CD33 antigen
1635	NA	NA	NA	NA	NA	NA	220.333	0.00318296	12490	Cd34	CD34 antigen
1636	NA	NA	NA	NA	NA	NA	NA	NA	12491	Cd36	CD36 antigen
1637	3714.67	NA	4396	NA	979.333	0.0647841	5092	NA	12492	Scarb2	scavenger receptor class B, member 2
1638	NA	NA	NA	NA	NA	NA	NA	NA	12493	Cd37	CD37 antigen
1639	NA	NA	317.333	0.00497216	NA	NA	NA	NA	12494	Cd38	CD38 antigen
1640	NA	NA	NA	NA	NA	NA	NA	NA	12495	Entpd1	ectonucleoside triphosphate diphosphohydrolase 1
1641	NA	NA	42.3333	8.7925e-05	NA	NA	NA	NA	12496	Entpd2	ectonucleoside triphosphate diphosphohydrolase 2
1642	NA	NA	4475.67	NA	NA	NA	1167	NA	12497	Entpd6	ectonucleoside triphosphate diphosphohydrolase 6
1643	4053.67	NA	3415.67	NA	1313	NA	5286.33	NA	12499	Entpd5	ectonucleoside triphosphate diphosphohydrolase 5
1644	NA	NA	NA	NA	NA	NA	NA	NA	12500	Cd3d	CD3 antigen, delta polypeptide
1645	NA	NA	NA	NA	NA	NA	NA	NA	12501	Cd3e	CD3 antigen, epsilon polypeptide
1646	NA	NA	NA	NA	NA	NA	NA	NA	12502	Cd3g	CD3 antigen, gamma polypeptide
1647	NA	NA	NA	NA	NA	NA	NA	NA	12503	Cd247	CD247 antigen
1648	NA	NA	NA	NA	NA	NA	NA	NA	12504	Cd4	CD4 antigen
1649	NA	NA	771.333	0.0337632	NA	NA	NA	NA	12505	Cd44	CD44 antigen
1650	NA	NA	NA	NA	NA	NA	NA	NA	12506	Cd48	CD48 antigen
1651	NA	NA	NA	NA	NA	NA	NA	NA	12507	Cd5	CD5 antigen
1652	NA	NA	NA	NA	NA	NA	NA	NA	12508	Cd53	CD53 antigen
1653	NA	NA	NA	NA	NA	NA	NA	NA	12509	Cd59a	CD59a antigen
1654	NA	NA	NA	NA	NA	NA	NA	NA	12511	Cd6	CD6 antigen
1655	NA	NA	NA	NA	NA	NA	NA	NA	12514	Cd68	CD68 antigen
1656	NA	NA	NA	NA	NA	NA	NA	NA	12515	Cd69	CD69 antigen
1657	NA	NA	NA	NA	NA	NA	NA	NA	12516	Cd7	CD7 antigen
1658	NA	NA	NA	NA	NA	NA	NA	NA	12517	Cd72	CD72 antigen
1659	NA	NA	NA	NA	NA	NA	NA	NA	12519	Cd80	CD80 antigen
1660	3229.67	NA	2090.67	NA	3288.67	NA	5459.67	NA	12520	Cd81	CD81 antigen
1661	2115.33	NA	4749.67	NA	481	0.0155691	NA	NA	12521	Cd82	CD82 antigen
1662	1696	NA	NA	NA	NA	NA	1213	NA	12522	Cd83	CD83 antigen
1663	NA	NA	NA	NA	NA	NA	NA	NA	12523	Cd84	CD84 antigen
1664	NA	NA	NA	NA	NA	NA	NA	NA	12524	Cd86	CD86 antigen
1665	NA	NA	NA	NA	NA	NA	NA	NA	12525	Cd8a	CD8 antigen, alpha chain
1666	NA	NA	NA	NA	NA	NA	NA	NA	12526	Cd8b1	CD8 antigen, beta chain 1
1667	3677	NA	2711	NA	555.333	0.0208493	NA	NA	12527	Cd9	CD9 antigen
1668	1652.33	NA	NA	NA	NA	NA	2285.67	NA	12530	Cdc25a	cell division cycle 25 homolog A (S. pombe)
1669	2656.33	NA	1179.67	0.0779719	NA	NA	NA	NA	12531	Cdc25b	cell division cycle 25 homolog B (S. pombe)
1670	NA	NA	NA	NA	NA	NA	NA	NA	12532	Cdc25c	cell division cycle 25 homolog C (S. pombe)
1671	277.333	0.00405667	NA	NA	NA	NA	NA	NA	12534	Cdc2a	cell division cycle 2 homolog A (S. pombe)
1672	NA	NA	4765.33	NA	3374	NA	2248.33	NA	12537	Cdc2l1	cell division cycle 2-like 1
1673	3347.67	NA	NA	NA	788	0.0423375	4399	NA	12539	Cdc37	cell division cycle 37 homolog (S. cerevisiae)
1674	3280	NA	2828.33	NA	3640	NA	4914	NA	12540	Cdc42	cell division cycle 42 homolog (S. cerevisiae)
1675	1215.67	0.0953308	NA	NA	NA	NA	NA	NA	12544	Cdc45l	cell division cycle 45 homolog (S. cerevisiae)-like
1676	NA	NA	NA	NA	NA	NA	NA	NA	12545	Cdc7	cell division cycle 7 (S. cerevisiae)
1677	NA	NA	NA	NA	NA	NA	NA	NA	12549	Cdgap	CDC42 GTPase-activating protein
1678	NA	NA	NA	NA	NA	NA	NA	NA	12550	Cdh1	cadherin 1
1679	2698.33	NA	2048.33	NA	5336.67	NA	NA	NA	12552	Cdh11	cadherin 11
1680	1869.33	NA	NA	NA	NA	NA	1416.33	NA	12554	Cdh13	cadherin 13
1681	NA	NA	NA	NA	NA	NA	NA	NA	12555	Cdh15	cadherin 15
1682	NA	NA	NA	NA	NA	NA	NA	NA	12556	Cdh16	cadherin 16
1683	NA	NA	NA	NA	NA	NA	NA	NA	12557	Cdh17	cadherin 17
1684	NA	NA	NA	NA	NA	NA	NA	NA	12560	Cdh3	cadherin 3
1685	NA	NA	NA	NA	NA	NA	NA	NA	12561	Cdh4	cadherin 4
1686	NA	NA	NA	NA	NA	NA	NA	NA	12562	Cdh5	cadherin 5
1687	NA	NA	NA	NA	NA	NA	NA	NA	12563	Cdh6	cadherin 6
1688	NA	NA	NA	NA	NA	NA	516.333	0.0200376	12564	Cdh8	cadherin 8
1689	NA	NA	NA	NA	NA	NA	947.667	0.0726781	12565	Cdh9	cadherin 9
1690	770.333	0.037511	NA	NA	NA	NA	NA	NA	12566	Cdk2	cyclin-dependent kinase 2
1691	1140.67	0.0839108	4380.67	NA	3818	NA	5146.33	NA	12567	Cdk4	cyclin-dependent kinase 4
1692	NA	NA	5593.67	NA	1770.67	NA	1952.33	NA	12568	Cdk5	cyclin-dependent kinase 5
1693	NA	NA	NA	NA	NA	NA	495.667	0.018387	12569	Cdk5r1	cyclin-dependent kinase 5, regulatory subunit 1 (p35)
1694	NA	NA	NA	NA	NA	NA	NA	NA	12570	Cdk5r2	cyclin-dependent kinase 5, regulatory subunit 2 (p39)
1695	NA	NA	NA	NA	NA	NA	NA	NA	12571	Cdk6	cyclin-dependent kinase 6
1696	3856.67	NA	3523.67	NA	2960.67	NA	4482.33	NA	12572	Cdk7	cyclin-dependent kinase 7 (homolog of Xenopus MO15 cdk-activating kinase)
1697	NA	NA	NA	NA	NA	NA	121	0.000818117	12575	Cdkn1a	cyclin-dependent kinase inhibitor 1A (P21)
1698	NA	NA	419.333	0.00924385	NA	NA	NA	NA	12576	Cdkn1b	cyclin-dependent kinase inhibitor 1B
1699	656.333	0.0266983	NA	NA	NA	NA	NA	NA	12577	Cdkn1c	cyclin-dependent kinase inhibitor 1C (P57)
1700	NA	NA	NA	NA	NA	NA	NA	NA	12578	Cdkn2a	cyclin-dependent kinase inhibitor 2A
1701	528.667	0.0169104	2556.33	NA	NA	NA	NA	NA	12579	Cdkn2b	cyclin-dependent kinase inhibitor 2B (p15, inhibits CDK4)
1702	1811.67	NA	2263.67	NA	3459.67	NA	NA	NA	12580	Cdkn2c	cyclin-dependent kinase inhibitor 2C (p18, inhibits CDK4)
1703	575.667	0.0201188	2767.33	NA	NA	NA	3757.33	NA	12583	Cdo1	cysteine dioxygenase 1, cytosolic
1704	3238	NA	NA	NA	822	0.0460652	3178.67	NA	12585	Cdr2	cerebellar degeneration-related 2
1705	NA	NA	343.333	0.00599209	NA	NA	NA	NA	12587	Mia1	melanoma inhibitory activity 1
1706	2608	NA	6007.67	NA	4009.33	NA	NA	NA	12589	Ift81	intraflagellar transport 81 homolog (Chlamydomonas)
1707	NA	NA	NA	NA	NA	NA	NA	NA	12590	Cdx1	caudal type homeo box 1
1708	NA	NA	NA	NA	NA	NA	NA	NA	12591	Cdx2	caudal type homeo box 2
1709	NA	NA	NA	NA	NA	NA	NA	NA	12592	Cdx4	caudal type homeo box 4
1710	2223	NA	4783.67	NA	2687.33	NA	4986.33	NA	12593	Cdyl	chromodomain protein, Y chromosome-like
1711	NA	NA	426.333	0.00955451	NA	NA	NA	NA	12606	Cebpa	CCAAT/enhancer binding protein (C/EBP), alpha
1712	1278.33	NA	NA	NA	3591.33	NA	NA	NA	12607	Cebpz	CCAAT/enhancer binding protein zeta
1713	NA	NA	729.667	0.0301583	NA	NA	NA	NA	12608	Cebpb	CCAAT/enhancer binding protein (C/EBP), beta
1714	2484.33	NA	689	0.0267101	4322.67	NA	NA	NA	12609	Cebpd	CCAAT/enhancer binding protein (C/EBP), delta
1715	3974.33	NA	2656.67	NA	3074.67	NA	4861	NA	12611	Cebpg	CCAAT/enhancer binding protein (C/EBP), gamma
1716	NA	NA	NA	NA	NA	NA	NA	NA	12613	Cel	carboxyl ester lipase
1717	NA	NA	NA	NA	NA	NA	NA	NA	12614	Celsr1	cadherin, EGF LAG seven-pass G-type receptor 1 (flamingo homolog, Drosophila)
1718	898.333	0.0516899	NA	NA	NA	NA	2618.33	NA	12615	Cenpa	centromere protein A
1719	NA	NA	NA	NA	NA	NA	NA	NA	12616	Cenpb	centromere protein B
1720	1730.67	NA	5135.33	NA	3126	NA	4783.33	NA	12617	Cenpc1	centromere protein C1
1721	NA	NA	NA	NA	NA	NA	NA	NA	12622	Cer1	cerberus 1 homolog (Xenopus laevis)
1722	NA	NA	NA	NA	NA	NA	NA	NA	12623	Ces1	carboxylesterase 1
1723	3137	NA	3162.33	NA	4596	NA	4108	NA	12626	Cetn3	centrin 3
1724	NA	NA	NA	NA	NA	NA	NA	NA	12627	Cfc1	cripto, FRL-1, cryptic family 1
1725	NA	NA	NA	NA	NA	NA	NA	NA	12628	Cfh	complement component factor h
1726	NA	NA	NA	NA	NA	NA	NA	NA	12630	Cfi	complement component factor i
1727	3241.33	NA	4745.33	NA	1385	NA	5017	NA	12632	Cfl2	cofilin 2, muscle
1728	NA	NA	NA	NA	NA	NA	NA	NA	12633	Cflar	CASP8 and FADD-like apoptosis regulator
1729	NA	NA	NA	NA	NA	NA	NA	NA	12638	Cftr	cystic fibrosis transmembrane conductance regulator homolog
1730	NA	NA	NA	NA	NA	NA	NA	NA	12640	Cga	glycoprotein hormones, alpha subunit
1731	NA	NA	NA	NA	NA	NA	NA	NA	12642	Ch25h	cholesterol 25-hydroxylase
1732	NA	NA	NA	NA	NA	NA	NA	NA	12643	Chad	chondroadherin
1733	NA	NA	NA	NA	NA	NA	NA	NA	12648	Chd1	chromodomain helicase DNA binding protein 1
1734	493.333	0.0145572	NA	NA	NA	NA	NA	NA	12649	Chek1	checkpoint kinase 1 homolog (S. pombe)
1735	3637	NA	2895.67	NA	5149.67	NA	3361.67	NA	12651	Chkb	choline kinase beta
1736	NA	NA	NA	NA	NA	NA	302	0.00613319	12652	Chga	chromogranin A
1737	NA	NA	NA	NA	NA	NA	498.333	0.018609	12653	Chgb	chromogranin B
1738	2271.33	NA	126.333	0.000750293	NA	NA	NA	NA	12654	Chi3l1	chitinase 3-like 1
1739	NA	NA	NA	NA	NA	NA	NA	NA	12655	Chi3l3	chitinase 3-like 3
1740	NA	NA	NA	NA	NA	NA	NA	NA	12659	Ovgp1	oviductal glycoprotein 1
1741	NA	NA	NA	NA	NA	NA	NA	NA	12660	Chka	choline kinase alpha
1742	803.333	0.0410248	NA	NA	NA	NA	NA	NA	12661	Chl1	cell adhesion molecule with homology to L1CAM
1743	2416.67	NA	5344.67	NA	3591.33	NA	NA	NA	12662	Chm	choroidermia
1744	NA	NA	NA	NA	NA	NA	NA	NA	12663	Chml	choroideremia-like
1745	NA	NA	NA	NA	NA	NA	1443.67	NA	12667	Chrd	chordin
1746	NA	NA	NA	NA	NA	NA	1219.67	NA	12669	Chrm1	cholinergic receptor, muscarinic 1, CNS
1747	NA	NA	NA	NA	NA	NA	NA	NA	12671	Chrm3	cholinergic receptor, muscarinic 3, cardiac
1748	NA	NA	NA	NA	NA	NA	NA	NA	12672	Chrm4	cholinergic receptor, muscarinic 4
1749	NA	NA	2222.33	NA	2526	NA	NA	NA	12675	Chuk	conserved helix-loop-helix ubiquitous kinase
1750	NA	NA	NA	NA	NA	NA	NA	NA	12677	Vsx2	visual system homeobox 2
1751	NA	NA	NA	NA	NA	NA	NA	NA	12683	Cidea	cell death-inducing DNA fragmentation factor, alpha subunit-like effector A
1752	NA	NA	151.333	0.00104338	NA	NA	NA	NA	12684	Cideb	cell death-inducing DNA fragmentation factor, alpha subunit-like effector B
1753	NA	NA	NA	NA	NA	NA	NA	NA	12686	Elovl3	elongation of very long chain fatty acids (FEN1/Elo2, SUR4/Elo3, yeast)-like 3
1754	NA	NA	NA	NA	NA	NA	NA	NA	12695	Inadl	InaD-like (Drosophila)
1755	4298.67	NA	1484.33	NA	3211.33	NA	NA	NA	12696	Cirbp	cold inducible RNA binding protein
1756	NA	NA	NA	NA	NA	NA	389	0.0108163	12700	Cish	cytokine inducible SH2-containing protein
1757	659.333	0.026963	NA	NA	NA	NA	NA	NA	12702	Socs3	suppressor of cytokine signaling 3
1758	NA	NA	NA	NA	NA	NA	NA	NA	12703	Socs1	suppressor of cytokine signaling 1
1759	1425.67	NA	NA	NA	NA	NA	NA	NA	12704	Cit	citron
1760	NA	NA	NA	NA	NA	NA	NA	NA	12705	Cited1	Cbp/p300-interacting transactivator with Glu/Asp-rich carboxy-terminal domain 1
1761	NA	NA	NA	NA	NA	NA	NA	NA	12715	Ckm	creatine kinase, muscle
1762	NA	NA	NA	NA	NA	NA	427	0.0132313	12716	Ckmt1	creatine kinase, mitochondrial 1, ubiquitous
1763	NA	NA	NA	NA	NA	NA	525	0.0208181	12721	Coro1a	coronin, actin binding protein 1A
1764	NA	NA	NA	NA	NA	NA	NA	NA	12722	Clca1	chloride channel calcium activated 1
1765	NA	NA	NA	NA	1380.33	NA	NA	NA	12724	Clcn2	chloride channel 2
1766	3900	NA	3566.33	NA	2682.33	NA	4602.33	NA	12725	Clcn3	chloride channel 3
1767	NA	NA	4431.33	NA	2728.67	NA	3699	NA	12727	Clcn4-2	chloride channel 4-2
1768	NA	NA	NA	NA	NA	NA	NA	NA	12728	Clcn5	chloride channel 5
1769	4963	NA	2584.33	NA	4252.67	NA	2966	NA	12729	Clns1a	chloride channel, nucleotide-sensitive, 1A
1770	NA	NA	NA	NA	NA	NA	NA	NA	12733	Clcnka	chloride channel Ka
1771	NA	NA	NA	NA	NA	NA	NA	NA	12737	Cldn1	claudin 1
1772	NA	NA	NA	NA	NA	NA	NA	NA	12738	Cldn2	claudin 2
1773	NA	NA	NA	NA	NA	NA	NA	NA	12739	Cldn3	claudin 3
1774	NA	NA	NA	NA	NA	NA	NA	NA	12740	Cldn4	claudin 4
1775	NA	NA	NA	NA	NA	NA	NA	NA	12741	Cldn5	claudin 5
1776	NA	NA	NA	NA	NA	NA	NA	NA	12745	Clgn	calmegin
1777	2245.33	NA	4363.33	NA	2066	NA	NA	NA	12747	Clk1	CDC-like kinase 1
1778	2356.33	NA	6124.33	NA	2898.67	NA	3754.33	NA	12748	Clk2	CDC-like kinase 2
1779	NA	NA	2651	NA	1085.33	0.0789677	NA	NA	12750	Clk4	CDC like kinase 4
1780	3851.67	NA	1764.33	NA	3570.67	NA	5119	NA	12751	Tpp1	tripeptidyl peptidase I
1781	2727.67	NA	1931.67	NA	3487.33	NA	NA	NA	12752	Cln3	ceroid lipofuscinosis, neuronal 3, juvenile (Batten, Spielmeyer-Vogt disease)
1782	2464.67	NA	6245.67	NA	1801	NA	NA	NA	12753	Clock	circadian locomoter output cycles kaput
1783	NA	NA	2869.33	NA	4925	NA	2559.67	NA	12757	Clta	clathrin, light polypeptide (Lca)
1784	NA	NA	796	0.0359437	NA	NA	NA	NA	12759	Clu	clusterin
1785	NA	NA	NA	NA	NA	NA	NA	NA	12763	Cmah	cytidine monophospho-N-acetylneuraminic acid hydroxylase
1786	NA	NA	6568.67	NA	3384.67	NA	1120.33	NA	12764	Cmas	cytidine monophospho-N-acetylneuraminic acid synthetase
1787	NA	NA	NA	NA	375.667	0.00916198	NA	NA	12765	Il8rb	interleukin 8 receptor, beta
1788	NA	NA	NA	NA	NA	NA	NA	NA	12766	Cxcr3	chemokine (C-X-C motif) receptor 3
1789	NA	NA	NA	NA	NA	NA	NA	NA	12767	Cxcr4	chemokine (C-X-C motif) receptor 4
1790	NA	NA	NA	NA	NA	NA	NA	NA	12768	Ccr1	chemokine (C-C motif) receptor 1
1791	NA	NA	NA	NA	NA	NA	NA	NA	12769	Ccr9	chemokine (C-C motif) receptor 9
1792	NA	NA	NA	NA	NA	NA	NA	NA	12770	Ccr1l1	chemokine (C-C motif) receptor 1-like 1
1793	NA	NA	NA	NA	NA	NA	NA	NA	12771	Ccr3	chemokine (C-C motif) receptor 3
1794	NA	NA	NA	NA	NA	NA	NA	NA	12772	Ccr2	chemokine (C-C motif) receptor 2
1795	NA	NA	NA	NA	NA	NA	NA	NA	12773	Ccr4	chemokine (C-C motif) receptor 4
1796	NA	NA	NA	NA	NA	NA	NA	NA	12774	Ccr5	chemokine (C-C motif) receptor 5
1797	NA	NA	NA	NA	NA	NA	NA	NA	12775	Ccr7	chemokine (C-C motif) receptor 7
1798	NA	NA	NA	NA	NA	NA	NA	NA	12776	Ccr8	chemokine (C-C motif) receptor 8
1799	NA	NA	NA	NA	NA	NA	NA	NA	12777	Ccr10	chemokine (C-C motif) receptor 10
1800	1117.33	0.0806719	3176.67	NA	NA	NA	4044	NA	12778	Cxcr7	chemokine (C-X-C motif) receptor 7
1801	NA	NA	NA	NA	NA	NA	NA	NA	12780	Abcc2	ATP-binding cassette, sub-family C (CFTR/MRP), member 2
1802	3303	NA	3287	NA	4062	NA	4318	NA	12785	Cnbp	cellular nucleic acid binding protein
1803	NA	NA	NA	NA	NA	NA	NA	NA	12788	Cnga1	cyclic nucleotide gated channel alpha 1
1804	NA	NA	NA	NA	NA	NA	NA	NA	12789	Cnga2	cyclic nucleotide gated channel alpha 2
1805	3532.67	NA	2972.67	NA	4253.67	NA	4195.67	NA	12793	Cnih	cornichon homolog (Drosophila)
1806	NA	NA	NA	NA	NA	NA	208.667	0.00281239	12794	Cnih2	cornichon homolog 2 (Drosophila)
1807	3429	NA	NA	NA	515	0.0179098	3170.67	NA	12795	Plk3	polo-like kinase 3 (Drosophila)
1808	NA	NA	NA	NA	NA	NA	NA	NA	12796	Camp	cathelicidin antimicrobial peptide
1809	NA	NA	NA	NA	NA	NA	NA	NA	12797	Cnn1	calponin 1
1810	242	0.00304547	NA	NA	NA	NA	NA	NA	12798	Cnn2	calponin 2
1811	2484.67	NA	4684.67	NA	210.667	0.00275486	NA	NA	12799	Cnp	2',3'-cyclic nucleotide 3' phosphodiesterase
1812	2714.67	NA	NA	NA	2923.33	NA	NA	NA	12801	Cnr1	cannabinoid receptor 1 (brain)
1813	NA	NA	NA	NA	NA	NA	NA	NA	12802	Cnr2	cannabinoid receptor 2 (macrophage)
1814	NA	NA	NA	NA	NA	NA	NA	NA	12804	Cntfr	ciliary neurotrophic factor receptor
1815	NA	NA	NA	NA	NA	NA	NA	NA	12805	Cntn1	contactin 1
1816	NA	NA	NA	NA	1458.67	NA	2190.33	NA	12807	Hps3	Hermansky-Pudlak syndrome 3 homolog (human)
1817	1959	NA	NA	NA	3820.67	NA	1876	NA	12808	Cobl	cordon-bleu
1818	NA	NA	NA	NA	2771.67	NA	501.333	0.0188292	12810	Coch	coagulation factor C homolog (Limulus polyphemus)
1819	2311.33	NA	6512.33	NA	4145.33	NA	2319.67	NA	12812	Coil	coilin
1820	NA	NA	NA	NA	NA	NA	NA	NA	12813	Col10a1	collagen, type X, alpha 1
1821	NA	NA	NA	NA	NA	NA	NA	NA	12814	Col11a1	collagen, type XI, alpha 1
1822	NA	NA	NA	NA	NA	NA	NA	NA	12815	Col11a2	collagen, type XI, alpha 2
1823	NA	NA	NA	NA	NA	NA	NA	NA	12816	Col12a1	collagen, type XII, alpha 1
1824	NA	NA	NA	NA	NA	NA	NA	NA	12817	Col13a1	collagen, type XIII, alpha 1
1825	NA	NA	NA	NA	NA	NA	NA	NA	12818	Col14a1	collagen, type XIV, alpha 1
1826	NA	NA	NA	NA	NA	NA	NA	NA	12819	Col15a1	collagen, type XV, alpha 1
1827	NA	NA	NA	NA	NA	NA	NA	NA	12821	Col17a1	collagen, type XVII, alpha 1
1828	NA	NA	NA	NA	NA	NA	NA	NA	12822	Col18a1	collagen, type XVIII, alpha 1
1829	NA	NA	NA	NA	NA	NA	NA	NA	12823	Col19a1	collagen, type XIX, alpha 1
1830	NA	NA	NA	NA	NA	NA	NA	NA	12824	Col2a1	collagen, type II, alpha 1
1831	NA	NA	NA	NA	NA	NA	NA	NA	12825	Col3a1	collagen, type III, alpha 1
1832	NA	NA	NA	NA	NA	NA	NA	NA	12826	Col4a1	collagen, type IV, alpha 1
1833	NA	NA	NA	NA	NA	NA	NA	NA	12827	Col4a2	collagen, type IV, alpha 2
1834	NA	NA	NA	NA	NA	NA	NA	NA	12828	Col4a3	collagen, type IV, alpha 3
1835	NA	NA	NA	NA	NA	NA	NA	NA	12829	Col4a4	collagen, type IV, alpha 4
1836	NA	NA	NA	NA	NA	NA	NA	NA	12830	Col4a5	collagen, type IV, alpha 5
1837	NA	NA	NA	NA	NA	NA	NA	NA	12831	Col5a1	collagen, type V, alpha 1
1838	NA	NA	NA	NA	NA	NA	NA	NA	12832	Col5a2	collagen, type V, alpha 2
1839	NA	NA	NA	NA	NA	NA	NA	NA	12833	Col6a1	collagen, type VI, alpha 1
1840	NA	NA	NA	NA	NA	NA	NA	NA	12834	Col6a2	collagen, type VI, alpha 2
1841	NA	NA	NA	NA	599.667	0.0242575	NA	NA	12835	Col6a3	collagen, type VI, alpha 3
1842	NA	NA	NA	NA	NA	NA	NA	NA	12836	Col7a1	collagen, type VII, alpha 1
1843	NA	NA	NA	NA	NA	NA	NA	NA	12837	Col8a1	collagen, type VIII, alpha 1
1844	NA	NA	NA	NA	NA	NA	NA	NA	12839	Col9a1	collagen, type IX, alpha 1
1845	NA	NA	NA	NA	NA	NA	NA	NA	12840	Col9a2	collagen, type IX, alpha 2
1846	402	0.00921276	3823.67	NA	3463	NA	NA	NA	12841	Col9a3	collagen, type IX, alpha 3
1847	NA	NA	NA	NA	NA	NA	NA	NA	12842	Col1a1	collagen, type I, alpha 1
1848	NA	NA	NA	NA	NA	NA	NA	NA	12843	Col1a2	collagen, type I, alpha 2
1849	NA	NA	NA	NA	NA	NA	NA	NA	12845	Comp	cartilage oligomeric matrix protein
1850	NA	NA	2305.67	NA	4734.33	NA	2168	NA	12846	Comt1	catechol-O-methyltransferase 1
1851	4170.67	NA	6247.33	NA	2314.67	NA	2211.33	NA	12847	Copa	coatomer protein complex subunit alpha
1852	3756.67	NA	5659.67	NA	1969.33	NA	3596	NA	12848	Cops2	COP9 (constitutive photomorphogenic) homolog, subunit 2 (Arabidopsis thaliana)
1853	4389.33	NA	2599	NA	4540.67	NA	3382.33	NA	12850	Coq7	demethyl-Q 7
1854	NA	NA	NA	NA	NA	NA	NA	NA	12854	Cort	cortistatin
1855	NA	NA	2227.33	NA	4845.67	NA	3210.33	NA	12857	Cox4i1	cytochrome c oxidase subunit IV isoform 1
1856	4082.67	NA	2810.67	NA	4968.33	NA	3137.67	NA	12858	Cox5a	cytochrome c oxidase, subunit Va
1857	3875.33	NA	3025	NA	5005.33	NA	3157.33	NA	12861	Cox6a1	cytochrome c oxidase, subunit VI a, polypeptide 1
1858	NA	NA	NA	NA	NA	NA	147.333	0.00125134	12862	Cox6a2	cytochrome c oxidase, subunit VI a, polypeptide 2
1859	3605.33	NA	3403	NA	3919	NA	4089.33	NA	12864	Cox6c	cytochrome c oxidase, subunit VIc
1860	NA	NA	581.333	0.0188203	NA	NA	2265.33	NA	12865	Cox7a1	cytochrome c oxidase, subunit VIIa 1
1861	NA	NA	2306.33	NA	5050.33	NA	2535.67	NA	12866	Cox7a2	cytochrome c oxidase, subunit VIIa 2
1862	NA	NA	519	0.0146732	NA	NA	2173.67	NA	12868	Cox8a	cytochrome c oxidase, subunit VIIIa
1863	NA	NA	NA	NA	NA	NA	NA	NA	12869	Cox8b	cytochrome c oxidase, subunit VIIIb
1864	NA	NA	NA	NA	NA	NA	NA	NA	12870	Cp	ceruloplasmin
1865	NA	NA	NA	NA	NA	NA	NA	NA	12873	Cpa3	carboxypeptidase A3, mast cell
1866	NA	NA	NA	NA	1537.33	NA	1705	NA	12874	Cpd	carboxypeptidase D
1867	3586	NA	2280	NA	5241.33	NA	3787.33	NA	12876	Cpe	carboxypeptidase E
1868	NA	NA	4069	NA	1528.67	NA	3120	NA	12877	Cpeb1	cytoplasmic polyadenylation element binding protein 1
1869	NA	NA	NA	NA	NA	NA	NA	NA	12879	Cys1	cystin 1
1870	NA	NA	NA	NA	NA	NA	758.667	0.0463462	12889	Cplx1	complexin 1
1871	NA	NA	NA	NA	NA	NA	NA	NA	12890	Cplx2	complexin 2
1872	NA	NA	NA	NA	2593.33	NA	683.333	0.036758	12891	Cpne6	copine VI
1873	2281.67	NA	NA	NA	622	0.0260604	NA	NA	12892	Cpox	coproporphyrinogen oxidase
1874	2686	NA	424.333	0.009449	4112	NA	NA	NA	12894	Cpt1a	carnitine palmitoyltransferase 1a, liver
1875	NA	NA	NA	NA	NA	NA	NA	NA	12895	Cpt1b	carnitine palmitoyltransferase 1b, muscle
1876	3645.67	NA	1803.33	NA	1694.67	NA	NA	NA	12896	Cpt2	carnitine palmitoyltransferase 2
1877	NA	NA	NA	NA	NA	NA	NA	NA	12902	Cr2	complement receptor 2
1878	NA	NA	NA	NA	NA	NA	NA	NA	12903	Crabp1	cellular retinoic acid binding protein I
1879	NA	NA	573.667	0.0182635	NA	NA	NA	NA	12904	Crabp2	cellular retinoic acid binding protein II
1880	NA	NA	NA	NA	NA	NA	NA	NA	12905	Cradd	CASP2 and RIPK1 domain containing adaptor with death domain
1881	2973	NA	1649	NA	4735.67	NA	NA	NA	12908	Crat	carnitine acetyltransferase
1882	NA	NA	2973.33	NA	NA	NA	2275.67	NA	12909	Crcp	calcitonin gene-related peptide-receptor component protein
1883	3226.33	NA	3984.33	NA	2833	NA	4751.33	NA	12912	Creb1	cAMP responsive element binding protein 1
1884	NA	NA	2443	NA	4663.67	NA	2672.67	NA	12913	Creb3	cAMP responsive element binding protein 3
1885	NA	NA	3892	NA	NA	NA	NA	NA	12914	Crebbp	CREB binding protein
1886	NA	NA	NA	NA	968.667	0.0634548	NA	NA	12915	Atf6b	activating transcription factor 6 beta
1887	NA	NA	2774.67	NA	NA	NA	1212.67	NA	12916	Crem	cAMP responsive element modulator
1888	NA	NA	5420.67	NA	NA	NA	514	0.0198067	12918	Crh	corticotropin releasing hormone
1889	NA	NA	NA	NA	NA	NA	294	0.00572861	12919	Crhbp	corticotropin releasing hormone binding protein
1890	NA	NA	NA	NA	NA	NA	382.667	0.0104475	12921	Crhr1	corticotropin releasing hormone receptor 1
1891	NA	NA	NA	NA	NA	NA	NA	NA	12922	Crhr2	corticotropin releasing hormone receptor 2
1892	NA	NA	435	0.0100249	NA	NA	NA	NA	12925	Crip1	cysteine-rich protein 1 (intestinal)
1893	3523.33	NA	4585.67	NA	1655.33	NA	NA	NA	12927	Bcar1	breast cancer anti-estrogen resistance 1
1894	3589.67	NA	3374	NA	5036.33	NA	NA	NA	12928	Crk	v-crk sarcoma virus CT10 oncogene homolog (avian)
1895	NA	NA	NA	NA	NA	NA	NA	NA	12929	Crkl	v-crk sarcoma virus CT10 oncogene homolog (avian)-like
1896	NA	NA	NA	NA	NA	NA	462	0.0157769	12931	Crlf1	cytokine receptor-like factor 1
1897	NA	NA	NA	NA	NA	NA	750.667	0.0452739	12933	Crmp1	collapsin response mediator protein 1
1898	3116.33	NA	5798.33	NA	1664.67	NA	4204	NA	12934	Dpysl2	dihydropyrimidinase-like 2
1899	NA	NA	NA	NA	NA	NA	NA	NA	12944	Crp	C-reactive protein, pentraxin-related
1900	NA	NA	NA	NA	NA	NA	NA	NA	12945	Dmbt1	deleted in malignant brain tumors 1
1901	3870.33	NA	1933	NA	2559	NA	5479.67	NA	12946	Cr1l	complement component (3b/4b) receptor 1-like
1902	NA	NA	376.333	0.00738863	NA	NA	NA	NA	12950	Hapln1	hyaluronan and proteoglycan link protein 1
1903	NA	NA	NA	NA	NA	NA	NA	NA	12951	Crx	cone-rod homeobox containing gene
1904	3017	NA	2952.67	NA	4122	NA	4709.67	NA	12952	Cry1	cryptochrome 1 (photolyase-like)
1905	NA	NA	2877.33	NA	3398	NA	3847	NA	12953	Cry2	cryptochrome 2 (photolyase-like)
1906	NA	NA	NA	NA	NA	NA	NA	NA	12954	Cryaa	crystallin, alpha A
1907	3379	NA	3629.67	NA	1586.33	NA	5447.33	NA	12955	Cryab	crystallin, alpha B
1908	NA	NA	NA	NA	NA	NA	NA	NA	12957	Cryba1	crystallin, beta A1
1909	NA	NA	NA	NA	NA	NA	NA	NA	12958	Cryba2	crystallin, beta A2
1910	NA	NA	NA	NA	NA	NA	NA	NA	12959	Cryba4	crystallin, beta A4
1911	NA	NA	639.667	0.0228883	NA	NA	NA	NA	12960	Crybb1	crystallin, beta B1
1912	NA	NA	NA	NA	NA	NA	NA	NA	12961	Crybb2	crystallin, beta B2
1913	NA	NA	NA	NA	NA	NA	NA	NA	12962	Crybb3	crystallin, beta B3
1914	NA	NA	NA	NA	NA	NA	NA	NA	12964	Cryga	crystallin, gamma A
1915	NA	NA	NA	NA	NA	NA	NA	NA	12965	Crygb	crystallin, gamma B
1916	NA	NA	NA	NA	NA	NA	NA	NA	12967	Crygd	crystallin, gamma D
1917	NA	NA	NA	NA	NA	NA	NA	NA	12969	Crygf	crystallin, gamma F
1918	NA	NA	NA	NA	NA	NA	NA	NA	12970	Crygs	crystallin, gamma S
1919	NA	NA	4470.67	NA	NA	NA	740.333	0.0438185	12971	Crym	crystallin, mu
1920	2857	NA	2274.67	NA	6015.67	NA	3551	NA	12972	Cryz	crystallin, zeta
1921	NA	NA	1720	NA	4015	NA	3849	NA	12974	Cs	citrate synthase
1922	NA	NA	1560.33	NA	1882	NA	NA	NA	12977	Csf1	colony stimulating factor 1 (macrophage)
1923	NA	NA	NA	NA	NA	NA	NA	NA	12978	Csf1r	colony stimulating factor 1 receptor
1924	NA	NA	NA	NA	NA	NA	NA	NA	12981	Csf2	colony stimulating factor 2 (granulocyte-macrophage)
1925	922.333	0.0545504	NA	NA	NA	NA	NA	NA	12982	Csf2ra	colony stimulating factor 2 receptor, alpha, low-affinity (granulocyte-macrophage)
1926	NA	NA	NA	NA	NA	NA	NA	NA	12983	Csf2rb	colony stimulating factor 2 receptor, beta, low-affinity (granulocyte-macrophage)
1927	NA	NA	NA	NA	NA	NA	NA	NA	12984	Csf2rb2	colony stimulating factor 2 receptor, beta 2, low-affinity (granulocyte-macrophage)
1928	NA	NA	NA	NA	NA	NA	NA	NA	12985	Csf3	colony stimulating factor 3 (granulocyte)
1929	NA	NA	NA	NA	NA	NA	NA	NA	12986	Csf3r	colony stimulating factor 3 receptor (granulocyte)
1930	2148.67	NA	6193.67	NA	3008.33	NA	3762	NA	12988	Csk	c-src tyrosine kinase
1931	NA	NA	NA	NA	NA	NA	NA	NA	12990	Csn1s1	casein alpha s1
1932	NA	NA	NA	NA	NA	NA	NA	NA	12991	Csn2	casein beta
1933	NA	NA	NA	NA	NA	NA	NA	NA	12992	Csn1s2b	casein alpha s2-like B
1934	NA	NA	NA	NA	NA	NA	NA	NA	12993	Csn1s2a	casein alpha s2-like A
1935	NA	NA	NA	NA	NA	NA	NA	NA	12994	Csn3	casein kappa
1936	2754.33	NA	5553.33	NA	2438.33	NA	4216	NA	12995	Csnk2a1	casein kinase 2, alpha 1 polypeptide
1937	3926.67	NA	6115	NA	3212.67	NA	1848	NA	13000	Csnk2a2	casein kinase 2, alpha prime polypeptide
1938	4560.67	NA	2723	NA	4817.33	NA	2793.67	NA	13001	Csnk2b	casein kinase 2, beta polypeptide
1939	NA	NA	3490.33	NA	NA	NA	NA	NA	13002	Dnajc5	DnaJ (Hsp40) homolog, subfamily C, member 5
1940	NA	NA	NA	NA	NA	NA	NA	NA	13003	Vcan	versican
1941	3585.67	NA	1221.33	0.0830598	NA	NA	3371.33	NA	13004	Ncan	neurocan
1942	2397	NA	4827.67	NA	1792.33	NA	5284	NA	13006	Smc3	structural maintenace of chromosomes 3
1943	4066	NA	1696.67	NA	1148.67	0.0877219	NA	NA	13007	Csrp1	cysteine and glycine-rich protein 1
1944	1907.67	NA	NA	NA	2680.33	NA	NA	NA	13008	Csrp2	cysteine and glycine-rich protein 2
1945	NA	NA	NA	NA	NA	NA	NA	NA	13009	Csrp3	cysteine and glycine-rich protein 3
1946	NA	NA	516	0.0144754	NA	NA	NA	NA	13010	Cst3	cystatin C
1947	NA	NA	NA	NA	NA	NA	NA	NA	13011	Cst7	cystatin F (leukocystatin)
1948	NA	NA	NA	NA	NA	NA	NA	NA	13012	Cst8	cystatin 8 (cystatin-related epididymal spermatogenic)
1949	NA	NA	NA	NA	NA	NA	NA	NA	13013	Cst9	cystatin 9
1950	4789.67	NA	2810	NA	2939.33	NA	4131.67	NA	13014	Cstb	cystatin B
1951	3696.33	NA	4482.67	NA	3885.67	NA	3174.67	NA	13016	Ctbp1	C-terminal binding protein 1
1952	1784	NA	2053.33	NA	NA	NA	NA	NA	13017	Ctbp2	C-terminal binding protein 2
1953	3418	NA	5240.33	NA	2524.33	NA	NA	NA	13018	Ctcf	CCCTC-binding factor
1954	2182	NA	394	0.00810668	NA	NA	NA	NA	13019	Ctf1	cardiotrophin 1
1955	NA	NA	NA	NA	NA	NA	NA	NA	13024	Ctla2a	cytotoxic T lymphocyte-associated protein 2 alpha
1956	NA	NA	1419.33	NA	2757.33	NA	NA	NA	13026	Pcyt1a	phosphate cytidylyltransferase 1, choline, alpha isoform
1957	4659.33	NA	4810.33	NA	3005	NA	2540	NA	13030	Ctsb	cathepsin B
1958	3265.67	NA	2826.67	NA	1336.67	NA	NA	NA	13032	Ctsc	cathepsin C
1959	5018	NA	2510.67	NA	3294.67	NA	3832	NA	13033	Ctsd	cathepsin D
1960	NA	NA	NA	NA	NA	NA	NA	NA	13034	Ctse	cathepsin E
1961	NA	NA	NA	NA	NA	NA	NA	NA	13035	Ctsg	cathepsin G
1962	NA	NA	NA	NA	NA	NA	NA	NA	13036	Ctsh	cathepsin H
1963	2322	NA	NA	NA	183.333	0.00207096	NA	NA	13038	Ctsk	cathepsin K
1964	3469	NA	4041	NA	2932.33	NA	4457	NA	13039	Ctsl	cathepsin L
1965	NA	NA	4419.67	NA	NA	NA	NA	NA	13040	Ctss	cathepsin S
1966	NA	NA	NA	NA	NA	NA	NA	NA	13041	Ctsw	cathepsin W
1967	3067.33	NA	6440	NA	2544.67	NA	3100.67	NA	13043	Cttn	cortactin
1968	NA	NA	NA	NA	NA	NA	NA	NA	13046	Cugbp1	CUG triplet repeat, RNA binding protein 1
1969	NA	NA	NA	NA	NA	NA	NA	NA	13047	Cux1	cut-like homeobox 1
1970	NA	NA	NA	NA	NA	NA	NA	NA	13048	Cux2	cut-like homeobox 2
1971	NA	NA	NA	NA	NA	NA	NA	NA	13051	Cx3cr1	chemokine (C-X3-C) receptor 1
1972	NA	NA	NA	NA	NA	NA	NA	NA	13052	Cxadr	coxsackie virus and adenovirus receptor
1973	NA	NA	NA	NA	NA	NA	301.667	0.00611887	13056	Cyb561	cytochrome b-561
1974	NA	NA	240	0.00274326	NA	NA	NA	NA	13057	Cyba	cytochrome b-245, alpha polypeptide
1975	NA	NA	NA	NA	NA	NA	NA	NA	13058	Cybb	cytochrome b-245, beta polypeptide
1976	NA	NA	2331.67	NA	NA	NA	1372.33	NA	13063	Cycs	cytochrome c, somatic
1977	NA	NA	NA	NA	NA	NA	NA	NA	13067	Cyct	cytochrome c, testis
1978	NA	NA	NA	NA	NA	NA	NA	NA	13070	Cyp11a1	cytochrome P450, family 11, subfamily a, polypeptide 1
1979	NA	NA	NA	NA	NA	NA	NA	NA	13072	Cyp11b2	cytochrome P450, family 11, subfamily b, polypeptide 2
1980	NA	NA	NA	NA	NA	NA	NA	NA	13074	Cyp17a1	cytochrome P450, family 17, subfamily a, polypeptide 1
1981	NA	NA	NA	NA	NA	NA	NA	NA	13075	Cyp19a1	cytochrome P450, family 19, subfamily a, polypeptide 1
1982	NA	NA	NA	NA	NA	NA	NA	NA	13076	Cyp1a1	cytochrome P450, family 1, subfamily a, polypeptide 1
1983	NA	NA	NA	NA	NA	NA	NA	NA	13077	Cyp1a2	cytochrome P450, family 1, subfamily a, polypeptide 2
1984	NA	NA	NA	NA	NA	NA	NA	NA	13078	Cyp1b1	cytochrome P450, family 1, subfamily b, polypeptide 1
1985	NA	NA	NA	NA	NA	NA	NA	NA	13079	Cyp21a1	cytochrome P450, family 21, subfamily a, polypeptide 1
1986	NA	NA	NA	NA	NA	NA	NA	NA	13081	Cyp24a1	cytochrome P450, family 24, subfamily a, polypeptide 1
1987	NA	NA	NA	NA	NA	NA	NA	NA	13082	Cyp26a1	cytochrome P450, family 26, subfamily a, polypeptide 1
1988	NA	NA	NA	NA	NA	NA	NA	NA	13085	Cyp2a12	cytochrome P450, family 2, subfamily a, polypeptide 12
1989	NA	NA	NA	NA	NA	NA	NA	NA	13088	Cyp2b10	cytochrome P450, family 2, subfamily b, polypeptide 10
1990	NA	NA	NA	NA	NA	NA	NA	NA	13089	Cyp2b13	cytochrome P450, family 2, subfamily b, polypeptide 13
1991	NA	NA	NA	NA	NA	NA	NA	NA	13090	Cyp2b19	cytochrome P450, family 2, subfamily b, polypeptide 19
1992	NA	NA	NA	NA	NA	NA	NA	NA	13094	Cyp2b9	cytochrome P450, family 2, subfamily b, polypeptide 9
1993	NA	NA	NA	NA	NA	NA	NA	NA	13095	Cyp2c29	cytochrome P450, family 2, subfamily c, polypeptide 29
1994	NA	NA	NA	NA	NA	NA	NA	NA	13096	Cyp2c37	cytochrome P450, family 2. subfamily c, polypeptide 37
1995	NA	NA	NA	NA	NA	NA	NA	NA	13097	Cyp2c38	cytochrome P450, family 2, subfamily c, polypeptide 38
1996	NA	NA	NA	NA	NA	NA	NA	NA	13098	Cyp2c39	cytochrome P450, family 2, subfamily c, polypeptide 39
1997	NA	NA	NA	NA	NA	NA	NA	NA	13101	Cyp2d10	cytochrome P450, family 2, subfamily d, polypeptide 10
1998	NA	NA	NA	NA	NA	NA	NA	NA	13105	Cyp2d9	cytochrome P450, family 2, subfamily d, polypeptide 9
1999	NA	NA	NA	NA	NA	NA	NA	NA	13106	Cyp2e1	cytochrome P450, family 2, subfamily e, polypeptide 1
[truncated: 14,332 more rows]
